# Supplementary material for: Reproducible and Opposing Microbiome Signatures Distinguish Autoimmune Diseases and Cancers: A Systematic Review and Meta-Analysis
Source: Research Square preprint supplement (doi:10.21203/rs.3.rs-1195626/v1), 2021-12-29
Supplement: Supplementary file 1 [file 52f28c0710fc11f9284a5139.docx]

**Supplementary Table 4.** Articles excluded from this study (n=148)

| **Reason for exclusion (n)** | **List of articles** |
| --- | --- |
| Non-metagenomic studies (n=33)  Not sequence based-microbiome study (specific microbes, virom, culture dependent, only metabolomic or proteomic, etc.) | 1. Amitay, Efrat L., Simone Werner, Marius Vital, Dietmar H. Pieper, Daniela Höfler, Indra-Jasmin Gierse, Julia Butt, Yesilda Balavarca, Katarina Cuk, and Hermann Brenner. 2017. “Fusobacterium and Colorectal Cancer: Causal Factor or Passenger? Results from a Large Colorectal Cancer Screening Study.” Carcinogenesis 38 (8): 781–88. 2. Dalla Costa, Gloria, Marzia Romeo, Federica Esposito, Francesca Sangalli, Bruno Colombo, Marta Radaelli, Lucia Moiola, Giancarlo Comi, and Vittorio Martinelli. 2019. “Caesarean Section and Infant Formula Feeding Are Associated with an Earlier Age of Onset of Multiple Sclerosis.” Multiple Sclerosis and Related Disorders 33 (August): 75–77. 3. Dörffel, Yvonne, Alexander Swidsinski, Vera Loening-Baucke, Bertram Wiedenmann, and Marianne Pavel. 2012. “Common Biostructure of the Colonic Microbiota in Neuroendocrine Tumors and Crohn’s Disease and the Effect of Therapy.” Inflammatory Bowel Diseases 18 (9): 1663–71. 4. Fukugaiti, Márcia H., Aline Ignacio, Miriam R. Fernandes, Ulysses Ribeiro Júnior, Viviane Nakano, and Mario J. Avila-Campos. 2015. “High Occurrence of Fusobacterium Nucleatum and Clostridium Difficile in the Intestinal Microbiota of Colorectal Carcinoma Patients.” Brazilian Journal of Microbiology: [publication of the Brazilian Society for Microbiology] 46 (4): 1135–40. 5. Gao, R., C. Kong, H. Li, L. Huang, X. Qu, N. Qin, and H. Qin. 2017. “Dysbiosis Signature of Mycobiota in Colon Polyp and Colorectal Cancer.” European Journal of Clinical Microbiology & Infectious Diseases: Official Publication of the European Society of Clinical Microbiology 36 (12): 2457–68. 6. Goffau, Marcus C. de, Susana Fuentes, Bartholomeus van den Bogert, Hanna Honkanen, Willem M. de Vos, Gjalt W. Welling, Heikki Hyöty, and Hermie J. M. Harmsen. 2014. “Aberrant Gut Microbiota Composition at the Onset of Type 1 Diabetes in Young Children.” Diabetologia 57 (8): 1569–77. 7. Grąt, M., K. M. Wronka, M. Krasnodębski, Ł. Masior, Z. Lewandowski, I. Kosińska, K. Grąt, et al. 2016. “Profile of Gut Microbiota Associated With the Presence of Hepatocellular Cancer in Patients With Liver Cirrhosis.” Transplantation Proceedings 48 (5): 1687–91. 8. Grobbee, Esmée J., Suk Yee Lam, Gwenny M. Fuhler, Blerdi Blakaj, Sergey R. Konstantinov, Marco J. Bruno, Maikel P. Peppelenbosch, Ernst J. Kuipers, and Manon C. W. Spaander. 2020. “First Steps towards Combining Faecal Immunochemical Testing with the Gut Microbiome in Colorectal Cancer Screening.” United European Gastroenterology Journal. <https://doi.org/10.1177/2050640619890732>. 9. Kadowaki, Atsushi, Ryoko Saga, Youwei Lin, Wakiro Sato, and Takashi Yamamura. 2019. “Gut Microbiota-Dependent CCR9+CD4+ T Cells Are Altered in Secondary Progressive Multiple Sclerosis.” Brain: A Journal of Neurology 142 (4): 916–31. 10. Kim, Minsuk, Emily Vogtmann, David A. Ahlquist, Mary E. Devens, John B. Kisiel, William R. Taylor, Bryan A. White, et al. 2020. “Fecal Metabolomic Signatures in Colorectal Adenoma Patients Are Associated with Gut Microbiota and Early Events of Colorectal Cancer Pathogenesis.” mBio. <https://doi.org/10.1128/mbio.03186-19>. 11. Liang, Qiaoyi, Jonathan Chiu, Yingxuan Chen, Yanqin Huang, Akira Higashimori, Jingyuan Fang, Hassan Brim, et al. 2017. “Fecal Bacteria Act as Novel Biomarkers for Noninvasive Diagnosis of Colorectal Cancer.” Clinical Cancer Research: An Official Journal of the American Association for Cancer Research 23 (8): 2061–70. 12. Lindfors, Katri, Jake Lin, Hye-Seung Lee, Heikki Hyöty, Matti Nykter, Kalle Kurppa, Edwin Liu, et al. 2020. “Metagenomics of the Faecal Virome Indicate a Cumulative Effect of Enterovirus and Gluten Amount on the Risk of Coeliac Disease Autoimmunity in Genetically at Risk Children: The TEDDY Study.” Gut. <https://doi.org/10.1136/gutjnl-2019-319809>. 13. Loo, Tze Mun, Fumitaka Kamachi, Yoshihiro Watanabe, Shin Yoshimoto, Hiroaki Kanda, Yuriko Arai, Yaeko Nakajima-Takagi, et al. 2017. “Gut Microbiota Promotes Obesity-Associated Liver Cancer through PGE2-Mediated Suppression of Antitumor Immunity.” Cancer Discovery 7 (5): 522–38. 14. Luan, Chunguang, Lingling Xie, Xi Yang, Huifang Miao, Na Lv, Ruifen Zhang, Xue Xiao, et al. 2015. “Dysbiosis of Fungal Microbiota in the Intestinal Mucosa of Patients with Colorectal Adenomas.” Scientific Reports 5 (January): 7980. 15. Luu, Trang H., Catherine Michel, Jean-Marie Bard, François Dravet, Hassan Nazih, and Christine Bobin-Dubigeon. 2017. “Intestinal Proportion of Blautia Sp. Is Associated with Clinical Stage and Histoprognostic Grade in Patients with Early-Stage Breast Cancer.” Nutrition and Cancer 69 (2): 267–75. 16. Mandl, Thomas, Jan Marsal, Peter Olsson, Bodil Ohlsson, and Kristofer Andréasson. 2017. “Severe Intestinal Dysbiosis Is Prevalent in Primary Sjögren’s Syndrome and Is Associated with Systemic Disease Activity.” Arthritis Research & Therapy 19 (1): 237. 17. Ma, Qin-Yun, Da-Yu Huang, Hui-Jun Zhang, Shaohua Wang, and Xiao-Feng Chen. 2017. “Upregulation of Bacterial-Specific Th1 and Th17 Responses That Are Enriched in CXCR5+CD4+ T Cells in Non-Small Cell Lung Cancer.” International Immunopharmacology 52 (November): 305–9. 18. Murri, Mora, Isabel Leiva, Juan Miguel Gomez-Zumaquero, Francisco J. Tinahones, Fernando Cardona, Federico Soriguer, and María Isabel Queipo-Ortuño. 2013. “Gut Microbiota in Children with Type 1 Diabetes Differs from That in Healthy Children: A Case-Control Study.” BMC Medicine 11 (February): 46. 19. Nakatsu, Geicho, Haokui Zhou, William Ka Kei Wu, Sunny Hei Wong, Olabisi Oluwabukola Coker, Zhenwei Dai, Xiangchun Li, et al. 2018. “Alterations in Enteric Virome Are Associated With Colorectal Cancer and Survival Outcomes.” Gastroenterology 155 (2): 529–41.e5. 20. Niccolai, Elena, Simone Baldi, Federica Ricci, Edda Russo, Giulia Nannini, Marta Menicatti, Giovanni Poli, et al. 2019. “Evaluation and Comparison of Short Chain Fatty Acids Composition in Gut Diseases.” World Journal of Gastroenterology: WJG 25 (36): 5543–58. 21. Nugent, Julia L., Amber N. McCoy, Cassandra J. Addamo, Wei Jia, Robert S. Sandler, and Temitope O. Keku. 2014. “Altered Tissue Metabolites Correlate with Microbial Dysbiosis in Colorectal Adenomas.” Journal of Proteome Research 13 (4): 1921–29. 22. Ohigashi, Seiji, Kazuki Sudo, Daiki Kobayashi, Osamu Takahashi, Takuya Takahashi, Takashi Asahara, Koji Nomoto, and Hisashi Onodera. 2013. “Changes of the Intestinal Microbiota, Short Chain Fatty Acids, and Fecal pH in Patients with Colorectal Cancer.” Digestive Diseases and Sciences 58 (6): 1717–26. 23. Pianta, Annalisa, Sheila L. Arvikar, Klemen Strle, Elise E. Drouin, Qi Wang, Catherine E. Costello, and Allen C. Steere. 2017. “Two Rheumatoid Arthritis-Specific Autoantigens Correlate Microbial Immunity with Autoimmune Responses in Joints.” The Journal of Clinical Investigation 127 (8): 2946–56. 24. Pinto, Elsa, Marisol Anselmo, Manuela Calha, Andrew Bottrill, Isabel Duarte, Peter W. Andrew, and Maria L. Faleiro. 2017. “The Intestinal Proteome of Diabetic and Control Children Is Enriched with Different Microbial and Host Proteins.” Microbiology 163 (2): 161–74. 25. Rezasoltani, Sama, Maryam Sharafkhah, Hamid Asadzadeh Aghdaei, Ehsan Nazemalhosseini Mojarad, Hossein Dabiri, Abbas Akhavan Sepahi, Mohammad Hossein Modarressi, Mohammad Mehdi Feizabadi, and Mohammad Reza Zali. 2018. “Applying Simple Linear Combination, Multiple Logistic and Factor Analysis Methods for Candidate Fecal Bacteria as Novel Biomarkers for Early Detection of Adenomatous Polyps and Colon Cancer.” Journal of Microbiological Methods 155 (December): 82–88. 26. Scanlan, Pauline D., Fergus Shanahan, Yvonne Clune, John K. Collins, Gerald C. O’Sullivan, Micheal O’Riordan, Elaine Holmes, Yulan Wang, and Julian R. Marchesi. 2008. “Culture-Independent Analysis of the Gut Microbiota in Colorectal Cancer and Polyposis.” Environmental Microbiology 10 (3): 789–98. 27. Sobhani, Iradj, Julien Tap, Françoise Roudot-Thoraval, Jean P. Roperch, Sophie Letulle, Philippe Langella, Gérard Corthier, Jeanne Tran Van Nhieu, and Jean P. Furet. 2011. “Microbial Dysbiosis in Colorectal Cancer (CRC) Patients.” PloS One 6 (1): e16393. 28. Song, Xinyang, Hanchao Gao, Yingying Lin, Yikun Yao, Shu Zhu, Jingjing Wang, Yan Liu, et al. 2014. “Alterations in the Microbiota Drive Interleukin-17C Production from Intestinal Epithelial Cells to Promote Tumorigenesis.” Immunity 40 (1): 140–52. 29. Tan, Binbin, Yunping Qiu, Xia Zou, Tianlu Chen, Guoxiang Xie, Yu Cheng, Taotao Dong, et al. 2013. “Metabonomics Identifies Serum Metabolite Markers of Colorectal Cancer.” Journal of Proteome Research 12 (6): 3000–3009. 30. Usami, Makoto, Makoto Miyoshi, Yoshihiro Kanbara, Michiko Aoyama, Hiroe Sakaki, Katsuhito Shuno, Kenrou Hirata, et al. 2013. “Analysis of Fecal Microbiota, Organic Acids and Plasma Lipids in Hepatic Cancer Patients with or without Liver Cirrhosis.” Clinical Nutrition 32 (3): 444–51. 31. Wang, Lili, Jianhua Zhou, Yongning Xin, Changxin Geng, Zibin Tian, Xinjuan Yu, and Quanjiang Dong. 2016. “Bacterial Overgrowth and Diversification of Microbiota in Gastric Cancer.” European Journal of Gastroenterology & Hepatology 28 (3): 261–66. 32. Yusuf, Fauzi, Syafruddin Ilyas, Harun Al Rasyid Damanik, and Fatchiyah Fatchiyah. 2016. “Microbiota Composition, HSP70 and Caspase-3 Expression as Marker for Colorectal Cancer Patients in Aceh, Indonesia.” Acta Medica Indonesiana 48 (4): 289–99. 33. Zhao, Guoyan, Tommi Vatanen, Lindsay Droit, Arnold Park, Aleksandar D. Kostic, Tiffany W. Poon, Hera Vlamakis, et al. 2017. “Intestinal Virome Changes Precede Autoimmunity in Type I Diabetes-Susceptible Children.” Proceedings of the National Academy of Sciences of the United States of America 114 (30): E6166–75. |
| Insufficient taxonomic data (n=32)  (Insufficient taxonomic data or incomplete case-control comparison of abundance data) | 1. Amir, Itay, Fred M. Konikoff, Michal Oppenheim, Uri Gophna, and Elizabeth E. Half. 2014. “Gastric Microbiota Is Altered in Oesophagitis and Barrett’s Oesophagus and Further Modified by Proton Pump Inhibitors.” Environmental Microbiology 16 (9): 2905–14. 2. Chiang, Hsin-I, Jian-Rong Li, Chun-Chi Liu, Po-Yu Liu, Hsin-Hua Chen, Yi-Ming Chen, Joung-Liang Lan, and Der-Yuan Chen. 2019. “An Association of Gut Microbiota with Different Phenotypes in Chinese Patients with Rheumatoid Arthritis.” Journal of Clinical Medicine Research 8 (11). <https://doi.org/10.3390/jcm8111770>. 3. De Angelis, Maria, Eustacchio Montemurno, Maria Piccolo, Lucia Vannini, Gabriella Lauriero, Valentina Maranzano, Giorgia Gozzi, et al. 2014. “Microbiota and Metabolome Associated with Immunoglobulin A Nephropathy (IgAN).” PloS One 9 (6): e99006. 4. Dejea, Christine M., Elizabeth C. Wick, Elizabeth M. Hechenbleikner, James R. White, Jessica L. Mark Welch, Blair J. Rossetti, Scott N. Peterson, et al. 2014. “Microbiota Organization Is a Distinct Feature of Proximal Colorectal Cancers.” Proceedings of the National Academy of Sciences of the United States of America 111 (51): 18321–26. 5. Deng, Xingming, Zhuofei Li, Guan Li, Bei Li, Xinhan Jin, and Guoqing Lyu. 2018. “Comparison of Microbiota in Patients Treated by Surgery or Chemotherapy by 16S rRNA Sequencing Reveals Potential Biomarkers for Colorectal Cancer Therapy.” Frontiers in Microbiology 9 (July): 1607. 6. Eun, Chang Soo, Byung Kwon Kim, Dong Soo Han, Seon Young Kim, Kyung Mo Kim, Bo Youl Choi, Kyu Sang Song, Yong Sung Kim, and Jihyun F. Kim. 2014. “Differences in Gastric Mucosal Microbiota Profiling in Patients with Chronic Gastritis, Intestinal Metaplasia, and Gastric Cancer Using Pyrosequencing Methods.” Helicobacter 19 (6): 407–16. 7. Gavin, Patrick G., Jane A. Mullaney, Dorothy Loo, Kim-Anh Lê Cao, Peter A. Gottlieb, Michelle M. Hill, Danny Zipris, and Emma E. Hamilton-Williams. 2018. “Intestinal Metaproteomics Reveals Host-Microbiota Interactions in Subjects at Risk for Type 1 Diabetes.” Diabetes Care 41 (10): 2178–86. 8. Goedert, James J., Yangming Gong, Xing Hua, Huanzi Zhong, Yimin He, Peng Peng, Guoqin Yu, et al. 2015. “Fecal Microbiota Characteristics of Patients with Colorectal Adenoma Detected by Screening: A Population-Based Study.” EBioMedicine 2 (6): 597–603. 9. Goedert, James J., Xing Hua, Agata Bielecka, Isao Okayasu, Ginger L. Milne, Gieira S. Jones, Mutsunori Fujiwara, et al. 2018. “Postmenopausal Breast Cancer and Oestrogen Associations with the IgA-Coated and IgA-Noncoated Faecal Microbiota.” British Journal of Cancer 118 (4): 471–79. 10. Goedert, James J., Gieira Jones, Xing Hua, Xia Xu, Guoqin Yu, Roberto Flores, Roni T. Falk, et al. 2015. “Investigation of the Association between the Fecal Microbiota and Breast Cancer in Postmenopausal Women: A Population-Based Case-Control Pilot Study.” Journal of the National Cancer Institute 107 (8). <https://doi.org/10.1093/jnci/djv147>. 11. González, Sonia, Isabel Gutie Rrez-Díaz, Patricia Lo Pez, Ana Suárez, Tania Fernández-Navarro, Borja Sánchez, and Abelardo Margolles. 2017. “Microbiota and Oxidant-Antioxidant Balance in Systemic Lupus Erythematosus.” Nutricion Hospitalaria: Organo Oficial de La Sociedad Espanola de Nutricion Parenteral Y Enteral 34 (4): 934–41. 12. Liss, Michael A., James Robert White, Martin Goros, Jonathan Gelfond, Robin Leach, Teresa Johnson-Pais, Zhao Lai, et al. 2018. “Metabolic Biosynthesis Pathways Identified from Fecal Microbiome Associated with Prostate Cancer.” European Urology 74 (5): 575–82. 13. Liu, Fang, Jingjing Li, Yubin Guan, Yanfeng Lou, Huiying Chen, Mingyu Xu, Dequan Deng, et al. 2019. “Dysbiosis of the Gut Microbiome Is Associated with Tumor Biomarkers in Lung Cancer.” International Journal of Biological Sciences 15 (11): 2381–92. 14. Liu, Wanxin, Ren Zhang, Rong Shu, Jinjing Yu, Huan Li, Hui Long, Shu Jin, et al. 2020. “Study of the Relationship between Microbiome and Colorectal Cancer Susceptibility Using 16SrRNA Sequencing.” BioMed Research International 2020 (January): 7828392. 15. Maeda, Yuichi, Takashi Kurakawa, Eiji Umemoto, Daisuke Motooka, Yoshinaga Ito, Kazuyoshi Gotoh, Keiji Hirota, et al. 2016. “Dysbiosis Contributes to Arthritis Development via Activation of Autoreactive T Cells in the Intestine.” Arthritis & Rheumatology (Hoboken, N.J.) 68 (11): 2646–61. 16. McFarlane, M., A. Millard, H. Hall, R. Savage, C. Constantinidou, R. Arasaradnam, and C. Nwokolo. 2019. “Urinary Volatile Organic Compounds and Faecal Microbiome Profiles in Colorectal Cancer.” Colorectal Disease: The Official Journal of the Association of Coloproctology of Great Britain and Ireland 21 (11): 1259–69. 17. Moris, German, Silvia Arboleya, Leonardo Mancabelli, Christian Milani, Marco Ventura, Clara G. de Los Reyes-Gavilán, and Miguel Gueimonde. 2018. “Fecal Microbiota Profile in a Group of Myasthenia Gravis Patients.” Scientific Reports 8 (1): 14384. 18. Muñiz Pedrogo, David A., Jun Chen, Benjamin Hillmann, Patricio Jeraldo, Gabriel Al-Ghalith, Veena Taneja, John M. Davis, et al. 2019. “An Increased Abundance of Clostridiaceae Characterizes Arthritis in Inflammatory Bowel Disease and Rheumatoid Arthritis: A Cross-Sectional Study.” Inflammatory Bowel Diseases 25 (5): 902–13. 19. Nam, Young-Do, Hak Jae Kim, Jae-Gu Seo, Seung Wan Kang, and Jin-Woo Bae. 2013. “Impact of Pelvic Radiotherapy on Gut Microbiota of Gynecological Cancer Patients Revealed by Massive Pyrosequencing.” PloS One 8 (12): e82659. 20. Nasrollahzadeh, Dariush, Reza Malekzadeh, Alexander Ploner, Ramin Shakeri, Masoud Sotoudeh, Saman Fahimi, Siavosh Nasseri-Moghaddam, et al. 2015. “Variations of Gastric Corpus Microbiota Are Associated with Early Esophageal Squamous Cell Carcinoma and Squamous Dysplasia.” Scientific Reports 5 (March): 8820. 21. Rajagopala, Seesandra V., Shibu Yooseph, Derek M. Harkins, Kelvin J. Moncera, Keri B. Zabokrtsky, Manolito G. Torralba, Andrey Tovchigrechko, et al. 2016. “Gastrointestinal Microbial Populations Can Distinguish Pediatric and Adolescent Acute Lymphoblastic Leukemia (ALL) at the Time of Disease Diagnosis.” BMC Genomics 17 (1): 635. 22. Richard, Mathias L., Giuseppina Liguori, Bruno Lamas, Giovanni Brandi, Gregory da Costa, Thomas W. Hoffmann, Massimo Pierluigi Di Simone, et al. 2018. “Mucosa-Associated Microbiota Dysbiosis in Colitis Associated Cancer.” Gut Microbes 9 (2): 131–42. 23. Russo, Edda, Giovanni Bacci, Carolina Chiellini, Camilla Fagorzi, Elena Niccolai, Antonio Taddei, Federica Ricci, et al. 2017. “Preliminary Comparison of Oral and Intestinal Human Microbiota in Patients with Colorectal Cancer: A Pilot Study.” Frontiers in Microbiology 8: 2699. 24. Sfanos, Karen S., Mark C. Markowski, Lauren B. Peiffer, Sarah E. Ernst, James R. White, Kenneth J. Pienta, Emmanuel S. Antonarakis, and Ashley E. Ross. 2018. “Compositional Differences in Gastrointestinal Microbiota in Prostate Cancer Patients Treated with Androgen Axis-Targeted Therapies.” Prostate Cancer and Prostatic Diseases 21 (4): 539–48. 25. Stoll, Matthew L., Pamela F. Weiss, Jennifer E. Weiss, Peter A. Nigrovic, Barbara S. Edelheit, S. Lou Bridges Jr, Maria I. Danila, et al. 2018. “Age and Fecal Microbial Strain-Specific Differences in Patients with Spondyloarthritis.” Arthritis Research & Therapy 20 (1): 14. 26. Stoll, M. L., R. Kumar, E. J. Lefkowitz, R. Q. Cron, C. D. Morrow, and S. Barnes. 2016. “Fecal Metabolomics in Pediatric Spondyloarthritis Implicate Decreased Metabolic Diversity and Altered Tryptophan Metabolism as Pathogenic Factors.” Genes and Immunity 17 (7): 400–405. 27. Storm-Larsen, C., K-M Myhr, E. Farbu, R. Midgard, K. Nyquist, L. Broch, P. Berg-Hansen, et al. 2019. “Gut Microbiota Composition during a 12-Week Intervention with Delayed-Release Dimethyl Fumarate in Multiple Sclerosis – a Pilot Trial.” Multiple Sclerosis Journal - Experimental, Translational and Clinical. <https://doi.org/10.1177/2055217319888767>. 28. Torres, Pedro J., Martyna Siakowska, Beata Banaszewska, Leszek Pawelczyk, Antoni J. Duleba, Scott T. Kelley, and Varykina G. Thackray. 2018. “Gut Microbial Diversity in Women With Polycystic Ovary Syndrome Correlates With Hyperandrogenism.” The Journal of Clinical Endocrinology and Metabolism 103 (4): 1502–11. 29. Yang, Jian, Dongfang Li, Zhenyu Yang, Wenkui Dai, Xin Feng, Yanhong Liu, Yiqi Jiang, et al. 2020. “Establishing High-Accuracy Biomarkers for Colorectal Cancer by Comparing Fecal Microbiomes in Patients with Healthy Families.” Gut Microbes 11 (4): 918–29. 30. Yang, Liying, Xiaohua Lu, Carlos W. Nossa, Fritz Francois, Richard M. Peek, and Zhiheng Pei. 2009. “Inflammation and Intestinal Metaplasia of the Distal Esophagus Are Associated with Alterations in the Microbiome.” Gastroenterology 137 (2): 588–97. 31. Yoon, Hyuk, Nayoung Kim, Ji Hyun Park, Yong Sung Kim, Jongchan Lee, Hyoung Woo Kim, Yoon Jin Choi, et al. 2017. “Comparisons of Gut Microbiota Among Healthy Control, Patients With Conventional Adenoma, Sessile Serrated Adenoma, and Colorectal Cancer.” Journal of Cancer Prevention 22 (2): 108–14. 32. Zhang, Xuan, Dongya Zhang, Huijue Jia, Qiang Feng, Donghui Wang, Di Liang, Xiangni Wu, et al. 2015. “The Oral and Gut Microbiomes Are Perturbed in Rheumatoid Arthritis and Partly Normalized after Treatment.” Nature Medicine 21 (8): 895–905. |
| Treatment intervention (n=19) | 1. Aykut, Berk, Smruti Pushalkar, Ruonan Chen, Qianhao Li, Raquel Abengozar, Jacqueline I. Kim, Sorin A. Shadaloey, et al. 2019. “The Fungal Mycobiome Promotes Pancreatic Oncogenesis via Activation of MBL.” Nature 574 (7777): 264–67. 2. Berer, Kerstin, Lisa Ann Gerdes, Egle Cekanaviciute, Xiaoming Jia, Liang Xiao, Zhongkui Xia, Chuan Liu, et al. 2017. “Gut Microbiota from Multiple Sclerosis Patients Enables Spontaneous Autoimmune Encephalomyelitis in Mice.” Proceedings of the National Academy of Sciences of the United States of America 114 (40): 10719–24. 3. Coker, Olabisi Oluwabukola, Geicho Nakatsu, Rudin Zhenwei Dai, William Ka Kei Wu, Sunny Hei Wong, Siew Chien Ng, Francis Ka Leung Chan, Joseph Jao Yiu Sung, and Jun Yu. 2019. “Enteric Fungal Microbiota Dysbiosis and Ecological Alterations in Colorectal Cancer.” Gut 68 (4): 654–62. 4. Dicksved, Johan, Mathilda Lindberg, Magnus Rosenquist, Helena Enroth, Janet K. Jansson, and Lars Engstrand. 2009. “Molecular Characterization of the Stomach Microbiota in Patients with Gastric Cancer and in Controls.” Journal of Medical Microbiology 58 (Pt 4): 509–16. 5. Dijkhuizen, E. H. Pieter van, Federica Del Chierico, Clara Malattia, Alessandra Russo, Denise Pires Marafon, Nienke M. Ter Haar, Silvia Magni-Manzoni, et al. 2019. “Microbiome Analytics of the Gut Microbiota in Patients With Juvenile Idiopathic Arthritis: A Longitudinal Observational Cohort Study.” Arthritis & Rheumatology (Hoboken, N.J.) 71 (6): 1000–1010. 6. Gao, Zhiguang, Bomin Guo, Renyuan Gao, Qingchao Zhu, Wen Wu, and Huanlong Qin. 2015. “Probiotics Modify Human Intestinal Mucosa-Associated Microbiota in Patients with Colorectal Cancer.” Molecular Medicine Reports 12 (4): 6119–27. 7. Hakim, Hana, Ronald Dallas, Joshua Wolf, Li Tang, Stacey Schultz-Cherry, Victoria Darling, Cydney Johnson, et al. 2018. “Gut Microbiome Composition Predicts Infection Risk During Chemotherapy in Children With Acute Lymphoblastic Leukemia.” Clinical Infectious Diseases: An Official Publication of the Infectious Diseases Society of America 67 (4): 541–48. 8. Kikuchi, Tomohiro, Kosaku Mimura, Mai Ashizawa, Hirokazu Okayama, Eisei Endo, Katsuharu Saito, Wataru Sakamoto, et al. 2020. “Characterization of Tumor-Infiltrating Immune Cells in Relation to Microbiota in Colorectal Cancers.” Cancer Immunology, Immunotherapy: CII 69 (1): 23–32. 9. Li, Jiante, Zhiliang Wei, Shougen Cao, Xiaojie Tan, Shanglong Liu, Zengwu Yao, Teng Sun, Yi Li, Dongfeng Zhang, and Yanbing Zhou. 2019. “A Pilot Study on Clinicopathological Features and Intestinal Microflora Changes in Colorectal Cancer Patients Born over a Nine-Year Period Encompassing Three Years before and after the Great Chinese Famine.” Cancer Epidemiology 59 (April): 166–72. 10. Lin, Xi-Hsuan, Jeng-Kai Jiang, Jiing-Chyuan Luo, Chung-Chi Lin, Po-Hsiang Ting, Ueng-Cheng Yang, Yuan-Tzu Lan, Yi-Hsiang Huang, Ming-Chih Hou, and Fa-Yauh Lee. 2019. “The Long Term Microbiota and Metabolic Status in Patients with Colorectal Cancer after Curative Colon Surgery.” PloS One 14 (6): e0218436. 11. Martina, A., G. E. Felis, M. Corradi, C. Maffeis, S. Torriani, and K. Venema. 2019. “Effects of Functional Pasta Ingredients on Different Gut Microbiota as Revealed by TIM-2 in Vitro Model of the Proximal Colon.” Beneficial Microbes 10 (3): 301–13. 12. Matson, Vyara, Jessica Fessler, Riyue Bao, Tara Chongsuwat, Yuanyuan Zha, Maria-Luisa Alegre, Jason J. Luke, and Thomas F. Gajewski. 2018. “The Commensal Microbiome Is Associated with Anti-PD-1 Efficacy in Metastatic Melanoma Patients.” Science 359 (6371): 104–8. 13. Molan, Abdul-Lateef, Zhuojian Liu, and Gabriel Plimmer. 2014. “Evaluation of the Effect of Blackcurrant Products on Gut Microbiota and on Markers of Risk for Colon Cancer in Humans.” Phytotherapy Research: PTR 28 (3): 416–22. 14. Mori, Giorgia, Simone Rampelli, Beatrice Silvia Orena, Claudia Rengucci, Giulia De Maio, Giulia Barbieri, Alessandro Passardi, et al. 2018. “Shifts of Faecal Microbiota During Sporadic Colorectal Carcinogenesis.” Scientific Reports 8 (1): 10329. 15. Paulsen, Jesseca A., Travis S. Ptacek, Stephen J. Carter, Nianjun Liu, Ranjit Kumar, Lakeshia Hyndman, Elliot J. Lefkowitz, Casey D. Morrow, and Laura Q. Rogers. 2017. “Gut Microbiota Composition Associated with Alterations in Cardiorespiratory Fitness and Psychosocial Outcomes among Breast Cancer Survivors.” Supportive Care in Cancer: Official Journal of the Multinational Association of Supportive Care in Cancer 25 (5): 1563–70. 16. Tankou, Stephanie K., Keren Regev, Brian C. Healy, Emily Tjon, Luca Laghi, Laura M. Cox, Pia Kivisäkk, et al. 2018. “A Probiotic Modulates the Microbiome and Immunity in Multiple Sclerosis.” Annals of Neurology 83 (6): 1147–61. 17. Zhang, Hong, Ying Chang, Qingqing Zheng, Rong Zhang, Cheng Hu, and Weiping Jia. 2019. “Altered Intestinal Microbiota Associated with Colorectal Cancer.” Frontiers of Medicine 13 (4): 461–70. 18. Zhang, Jiaming, Fanghua Zhang, Changying Zhao, Qian Xu, Cheng Liang, Ying Yang, Huiling Wang, et al. 2019. “Dysbiosis of the Gut Microbiome Is Associated with Thyroid Cancer and Thyroid Nodules and Correlated with Clinical Index of Thyroid Function.” Endocrine 64 (3): 564–74. 19. Zhou, Gang, and Jing Yang. 2019. “Correlations of Gastrointestinal Hormones with Inflammation and Intestinal Flora in Patients with Gastric Cancer.” Journal of B.U.ON.: Official Journal of the Balkan Union of Oncology 24 (4): 1595–1600. |
| No healthy control (n=18) | 1. Aviles-Jimenez, Francisco, Flor Vazquez-Jimenez, Rafael Medrano-Guzman, Alejandra Mantilla, and Javier Torres. 2014. “Stomach Microbiota Composition Varies between Patients with Non-Atrophic Gastritis and Patients with Intestinal Type of Gastric Cancer.” Scientific Reports 4 (February): 4202. 2. Coker, Olabisi Oluwabukola, Zhenwei Dai, Yongzhan Nie, Guijun Zhao, Lei Cao, Geicho Nakatsu, William Kk Wu, et al. 2018. “Mucosal Microbiome Dysbiosis in Gastric Carcinogenesis.” Gut 67 (6): 1024–32. 3. Cremonesi, Eleonora, Valeria Governa, Jesus Francisco Glaus Garzon, Valentina Mele, Francesca Amicarella, Manuele Giuseppe Muraro, Emanuele Trella, et al. 2018. “Gut Microbiota Modulate T Cell Trafficking into Human Colorectal Cancer.” Gut 67 (11): 1984–94. 4. Endesfelder, David, Wolfgang zu Castell, Alexandria Ardissone, Austin G. Davis-Richardson, Peter Achenbach, Michael Hagen, Maren Pflueger, et al. 2014. “Compromised Gut Microbiota Networks in Children with Anti-Islet Cell Autoimmunity.” Diabetes 63 (6): 2006–14. 5. Gall, Alevtina, Jutta Fero, Connor McCoy, Brian C. Claywell, Carissa A. Sanchez, Patricia L. Blount, Xiaohong Li, et al. 2015. “Bacterial Composition of the Human Upper Gastrointestinal Tract Microbiome Is Dynamic and Associated with Genomic Instability in a Barrett’s Esophagus Cohort.” PloS One 10 (6): e0129055. 6. Gao, R., C. Kong, L. Huang, H. Li, X. Qu, Z. Liu, P. Lan, J. Wang, and H. Qin. 2017. “Mucosa-Associated Microbiota Signature in Colorectal Cancer.” European Journal of Clinical Microbiology & Infectious Diseases: Official Publication of the European Society of Clinical Microbiology 36 (11): 2073–83. 7. González-Mercado, Velda J., Jean Lim, Lawrence Berk, Mary Esele, Carmen S. Rodríguez, and Gerardo Colón-Otero. 2020. “Gut Microbiota Differences in Island Hispanic Puerto Ricans and Mainland Non-Hispanic Whites during Chemoradiation for Rectal Cancer: A Pilot Study.” Current Problems in Cancer 44 (4): 100551. 8. Hamada, Shin, Atsushi Masamune, Tatsuhide Nabeshima, and Tooru Shimosegawa. 2018. “Differences in Gut Microbiota Profiles between Autoimmune Pancreatitis and Chronic Pancreatitis.” The Tohoku Journal of Experimental Medicine 244 (2): 113–17. 9. Katz Sand, Ilana, Yunjiao Zhu, Achilles Ntranos, Jose C. Clemente, Egle Cekanaviciute, Rachel Brandstadter, Elizabeth Crabtree-Hartman, et al. 2019. “Disease-Modifying Therapies Alter Gut Microbial Composition in MS.” Neurology(R) Neuroimmunology & Neuroinflammation 6 (1): e517. 10. Kinross, James, Reza Mirnezami, James Alexander, Richard Brown, Alasdair Scott, Dieter Galea, Kirill Veselkov, et al. 2017. “A Prospective Analysis of Mucosal Microbiome-Metabonome Interactions in Colorectal Cancer Using a Combined MAS 1HNMR and Metataxonomic Strategy.” Scientific Reports 7 (1): 8979. 11. Kostic, Aleksandar D., Dirk Gevers, Heli Siljander, Tommi Vatanen, Tuulia Hyötyläinen, Anu-Maaria Hämäläinen, Aleksandr Peet, et al. 2015. “The Dynamics of the Human Infant Gut Microbiome in Development and in Progression toward Type 1 Diabetes.” Cell Host & Microbe 17 (2): 260–73. 12. Lee, Jin-Young, Mohamed Mannaa, Yunkyung Kim, Jehun Kim, Geun-Tae Kim, and Young-Su Seo. 2019. “Comparative Analysis of Fecal Microbiota Composition Between Rheumatoid Arthritis and Osteoarthritis Patients.” Genes 10 (10). <https://doi.org/10.3390/genes10100748>. 13. Nearing, Jacob T., Jessica Connors, Scott Whitehouse, Johan Van Limbergen, Tamara Macdonald, Ketan Kulkarni, and Morgan G. I. Langille. 2019. “Infectious Complications Are Associated With Alterations in the Gut Microbiome in Pediatric Patients With Acute Lymphoblastic Leukemia.” Frontiers in Cellular and Infection Microbiology 9 (February): 28. 14. Purcell, Rachel V., Martina Visnovska, Patrick J. Biggs, Sebastian Schmeier, and Frank A. Frizelle. 2017. “Distinct Gut Microbiome Patterns Associate with Consensus Molecular Subtypes of Colorectal Cancer.” Scientific Reports 7 (1): 11590. 15. Rintala, Anniina, Iiris Riikonen, Anne Toivonen, Sami Pietilä, Eveliina Munukka, Juha-Pekka Pursiheimo, Laura L. Elo, et al. 2018. “Early Fecal Microbiota Composition in Children Who Later Develop Celiac Disease and Associated Autoimmunity.” Scandinavian Journal of Gastroenterology 53 (4): 403–9. 16. Shi, Ting-Ting, Lin Hua, Hua Wang, and Zhong Xin. 2019. “The Potential Link between Gut Microbiota and Serum TRAb in Chinese Patients with Severe and Active Graves’ Orbitopathy.” International Journal of Endocrinology 2019 (December): 9736968. 17. Tremlett, Helen, Douglas W. Fadrosh, Ali A. Faruqi, Janace Hart, Shelly Roalstad, Jennifer Graves, Susan Lynch, Emmanuelle Waubant, and US Network of Pediatric MS Centers. 2016. “Gut Microbiota Composition and Relapse Risk in Pediatric MS: A Pilot Study.” Journal of the Neurological Sciences 363 (April): 153–57. 18. Yu, Guoqin, Nan Hu, Lemin Wang, Chaoyu Wang, Xiao-You Han, Mike Humphry, Jacques Ravel, Christian C. Abnet, Philip R. Taylor, and Alisa M. Goldstein. 2017. “Gastric Microbiota Features Associated with Cancer Risk Factors and Clinical Outcomes: A Pilot Study in Gastric Cardia Cancer Patients from Shanxi, China.” International Journal of Cancer. Journal International Du Cancer 141 (1): 45–51. |
| No disease onset during sampling (n=13) | 1. Alpizar-Rodriguez, Deshire, Till Robin Lesker, Achim Gronow, Benoît Gilbert, Elena Raemy, Celine Lamacchia, Cem Gabay, Axel Finckh, and Till Strowig. 2019. “Prevotella Copri in Individuals at Risk for Rheumatoid Arthritis.” Annals of the Rheumatic Diseases 78 (5): 590–93. 2. Asquith, Mark, Peter R. Sternes, Mary-Ellen Costello, Lisa Karstens, Sarah Diamond, Tammy M. Martin, Zhixiu Li, et al. 2019. “HLA Alleles Associated With Risk of Ankylosing Spondylitis and Rheumatoid Arthritis Influence the Gut Microbiome.” Arthritis & Rheumatology (Hoboken, N.J.) 71 (10): 1642–50. 3. Brown, Christopher T., Austin G. Davis-Richardson, Adriana Giongo, Kelsey A. Gano, David B. Crabb, Nabanita Mukherjee, George Casella, et al. 2011. “Gut Microbiome Metagenomics Analysis Suggests a Functional Model for the Development of Autoimmunity for Type 1 Diabetes.” PloS One 6 (10): e25792. 4. Cinek, Ondrej, Lenka Kramna, Jake Lin, Sami Oikarinen, Katerina Kolarova, Jorma Ilonen, Olli Simell, Riitta Veijola, Reija Autio, and Heikki Hyöty. 2017. “Imbalance of Bacteriome Profiles within the Finnish Diabetes Prediction and Prevention Study: Parallel Use of 16S Profiling and Virome Sequencing in Stool Samples from Children with Islet Autoimmunity and Matched Controls.” Pediatric Diabetes 18 (7): 588–98. 5. Davis-Richardson, Austin G., Alexandria N. Ardissone, Raquel Dias, Ville Simell, Michael T. Leonard, Kaisa M. Kemppainen, Jennifer C. Drew, et al. 2014. “Bacteroides Dorei Dominates Gut Microbiome prior to Autoimmunity in Finnish Children at High Risk for Type 1 Diabetes.” Frontiers in Microbiology 5 (December): 678. 6. Giongo, Adriana, Kelsey A. Gano, David B. Crabb, Nabanita Mukherjee, Luis L. Novelo, George Casella, Jennifer C. Drew, et al. 2011. “Toward Defining the Autoimmune Microbiome for Type 1 Diabetes.” The ISME Journal 5 (1): 82–91. 7. Goffau, Marcus C. de, Kristiina Luopajärvi, Mikael Knip, Jorma Ilonen, Terhi Ruohtula, Taina Härkönen, Laura Orivuori, et al. 2013. “Fecal Microbiota Composition Differs between Children with β-Cell Autoimmunity and Those without.” Diabetes 62 (4): 1238–44. 8. Kemppainen, Kaisa M., Alexandria N. Ardissone, Austin G. Davis-Richardson, Jennie R. Fagen, Kelsey A. Gano, Luis G. León-Novelo, Kendra Vehik, et al. 2015. “Early Childhood Gut Microbiomes Show Strong Geographic Differences among Subjects at High Risk for Type 1 Diabetes.” Diabetes Care 38 (2): 329–32. 9. Maffeis, Claudio, Alessia Martina, Massimiliano Corradi, Sara Quarella, Nicole Nori, Sandra Torriani, Mario Plebani, Giovanna Contreas, and Giovanna E. Felis. 2016. “Association between Intestinal Permeability and Faecal Microbiota Composition in Italian Children with Beta Cell Autoimmunity at Risk for Type 1 Diabetes.” Diabetes/metabolism Research and Reviews 32 (7): 700–709. 10. Russell, Jordan T., Luiz F. W. Roesch, Malin Ördberg, Jorma Ilonen, Mark A. Atkinson, Desmond A. Schatz, Eric W. Triplett, and Johnny Ludvigsson. 2019. “Genetic Risk for Autoimmunity Is Associated with Distinct Changes in the Human Gut Microbiome.” Nature Communications 10 (1): 3621. 11. Vatanen, Tommi, Aleksandar D. Kostic, Eva d’Hennezel, Heli Siljander, Eric A. Franzosa, Moran Yassour, Raivo Kolde, et al. 2016. “Variation in Microbiome LPS Immunogenicity Contributes to Autoimmunity in Humans.” Cell 165 (4): 842–53. 12. Wacklin, Pirjo, Katri Kaukinen, Elina Tuovinen, Pekka Collin, Katri Lindfors, Jukka Partanen, Markku Mäki, and Jaana Mättö. 2013. “The Duodenal Microbiota Composition of Adult Celiac Disease Patients Is Associated with the Clinical Manifestation of the Disease.” Inflammatory Bowel Diseases 19 (5): 934–41. 13. Yang, Ines, Sabrina Woltemate, M. Blanca Piazuelo, Luis E. Bravo, Maria Clara Yepez, Judith Romero-Gallo, Alberto G. Delgado, et al. 2016. “Different Gastric Microbiota Compositions in Two Human Populations with High and Low Gastric Cancer Risk in Colombia.” Scientific Reports 6 (January): 18594. |
| Other disease condition (n=10) | 1. Aden, Konrad, Ateequr Rehman, Silvio Waschina, Wei-Hung Pan, Alesia Walker, Marianna Lucio, Alejandro Mena Nunez, et al. 2019. “Metabolic Functions of Gut Microbes Associate With Efficacy of Tumor Necrosis Factor Antagonists in Patients With Inflammatory Bowel Diseases.” Gastroenterology 157 (5): 1279–92.e11. 2. Duboc, Henri, Sylvie Rajca, Dominique Rainteau, David Benarous, Marie-Anne Maubert, Elodie Quervain, Ginette Thomas, et al. 2013. “Connecting Dysbiosis, Bile-Acid Dysmetabolism and Gut Inflammation in Inflammatory Bowel Diseases.” Gut 62 (4): 531–39. 3. Gantuya, Boldbaatar, Hashem B. El-Serag, Takashi Matsumoto, Nadim J. Ajami, Khasag Oyuntsetseg, Dashdorj Azzaya, Tomohisa Uchida, and Yoshio Yamaoka. 2019. “Gastric Microbiota in Helicobacter Pylori-Negative and -Positive Gastritis Among High Incidence of Gastric Cancer Area.” Cancers 11 (4). <https://doi.org/10.3390/cancers11040504>. 4. Gao, Juan-Juan, Yang Zhang, Markus Gerhard, Raquel Mejias-Luque, Lian Zhang, Michael Vieth, Jun-Ling Ma, et al. 2018. “Association Between Gut Microbiota and Helicobacter Pylori-Related Gastric Lesions in a High-Risk Population of Gastric Cancer.” Frontiers in Cellular and Infection Microbiology 8 (June): 202. 5. Hester, Christina M., Venkatakrishna R. Jala, Morgan Gi Langille, Shahid Umar, K. Allen Greiner, and Bodduluri Haribabu. 2015. “Fecal Microbes, Short Chain Fatty Acids, and Colorectal Cancer across Racial/ethnic Groups.” World Journal of Gastroenterology: WJG 21 (9): 2759–69. 6. Insenser, María, Mora Murri, Rosa Del Campo, M. Ángeles Martínez-García, Elena Fernández-Durán, and Héctor F. Escobar-Morreale. 2018. “Gut Microbiota and the Polycystic Ovary Syndrome: Influence of Sex, Sex Hormones, and Obesity.” The Journal of Clinical Endocrinology and Metabolism 103 (7): 2552–62. 7. Lindheim, Lisa, Mina Bashir, Julia Münzker, Christian Trummer, Verena Zachhuber, Bettina Leber, Angela Horvath, et al. 2017. “Alterations in Gut Microbiome Composition and Barrier Function Are Associated with Reproductive and Metabolic Defects in Women with Polycystic Ovary Syndrome (PCOS): A Pilot Study.” PloS One 12 (1): e0168390. 8. Ou, Junhai, Franck Carbonero, Erwin G. Zoetendal, James P. DeLany, Mei Wang, Keith Newton, H. Rex Gaskins, and Stephen J. D. O’Keefe. 2013. “Diet, Microbiota, and Microbial Metabolites in Colon Cancer Risk in Rural Africans and African Americans.” The American Journal of Clinical Nutrition 98 (1): 111–20. 9. Vogtmann, Emily, Roberto Flores, Guoqin Yu, Neal D. Freedman, Jianxin Shi, Mitchell H. Gail, Bruce A. Dye, et al. 2015. “Association between Tobacco Use and the Upper Gastrointestinal Microbiome among Chinese Men.” Cancer Causes & Control: CCC 26 (4): 581–88. 10. Zeng, Bo, Zhiwen Lai, Lijin Sun, Zhongbao Zhang, Jianhua Yang, Zaixin Li, Jie Lin, and Zhi Zhang. 2019. “Structural and Functional Profiles of the Gut Microbial Community in Polycystic Ovary Syndrome with Insulin Resistance (IR-PCOS): A Pilot Study.” Research in Microbiology 170 (1): 43–52. |
| Non-gut microbiome (n=7) | 1. Chen, Xingdong, Björn Winckler, Ming Lu, Hongwei Cheng, Ziyu Yuan, Yajun Yang, Li Jin, and Weimin Ye. 2015. “Oral Microbiota and Risk for Esophageal Squamous Cell Carcinoma in a High-Risk Area of China.” PloS One 10 (12): e0143603. 2. Cosorich, Ilaria, Gloria Dalla-Costa, Chiara Sorini, Roberto Ferrarese, Maria Josè Messina, Jayashree Dolpady, Elisa Radice, et al. 2017. “High Frequency of Intestinal TH17 Cells Correlates with Microbiota Alterations and Disease Activity in Multiple Sclerosis.” Science Advances 3 (7): e1700492. 3. Lee, Huisong, Hyeon Kook Lee, Seog Ki Min, and Won Hee Lee. 2020. “16S rDNA Microbiome Composition Pattern Analysis as a Diagnostic Biomarker for Biliary Tract Cancer.” World Journal of Surgical Oncology 18 (1): 19. 4. Liu, Xiaosun, Li Shao, Xia Liu, Feng Ji, Ying Mei, Yiwen Cheng, Fengping Liu, Chongxian Yan, Lanjuan Li, and Zongxin Ling. 2019. “Alterations of Gastric Mucosal Microbiota across Different Stomach Microhabitats in a Cohort of 276 Patients with Gastric Cancer.” EBioMedicine 40 (February): 336–48. 5. Ogunrinde, Elizabeth, Zejun Zhou, Zhenwu Luo, Alexander Alekseyenko, Quan-Zhen Li, Danielle Macedo, Diane L. Kamen, Jim C. Oates, Gary S. Gilkeson, and Wei Jiang. 2019. “A Link Between Plasma Microbial Translocation, Microbiome, and Autoantibody Development in First-Degree Relatives of Systemic Lupus Erythematosus Patients.” Arthritis & Rheumatology (Hoboken, N.J.) 71 (11): 1858–68. 6. Pellegrini, Silvia, Valeria Sordi, Andrea Mario Bolla, Diego Saita, Roberto Ferrarese, Filippo Canducci, Massimo Clementi, et al. 2017. “Duodenal Mucosa of Patients With Type 1 Diabetes Shows Distinctive Inflammatory Profile and Microbiota.” The Journal of Clinical Endocrinology and Metabolism 102 (5): 1468–77. 7. Walsh, Dana M., Alexis N. Hokenstad, Jun Chen, Jaeyun Sung, Gregory D. Jenkins, Nicholas Chia, Heidi Nelson, Andrea Mariani, and Marina R. S. Walther-Antonio. 2019. “Postmenopause as a Key Factor in the Composition of the Endometrial Cancer Microbiome (ECbiome).” Scientific Reports 9 (1): 19213. |
| Other publication types (n=6) | 1. Abu-Ghazaleh, Nadine, Weng Joe Chua, and Vinod Gopalan. 2020. “Intestinal Microbiota and Its Association with Colon Cancer and Red/processed Meat Consumption.” Journal of Gastroenterology and Hepatology. <https://onlinelibrary.wiley.com/doi/abs/10.1111/jgh.15042>. 2. Cekanaviciute, Egle, Bryan B. Yoo, Tessel F. Runia, Justine W. Debelius, Sneha Singh, Charlotte A. Nelson, Rachel Kanner, et al. 2017. “Gut Bacteria from Multiple Sclerosis Patients Modulate Human T Cells and Exacerbate Symptoms in Mouse Models.” Proceedings of the National Academy of Sciences of the United States of America 114 (40): 10713–18. 3. Greenhill, Claire. 2013. “Paediatrics: Differences in the Faecal Microbiota of Children with β-Cell Autoimmunity.” Nature Reviews. Endocrinology. 4. Heintz-Buschart, Anna, Patrick May, Cédric C. Laczny, Laura A. Lebrun, Camille Bellora, Abhimanyu Krishna, Linda Wampach, et al. 2016. “Integrated Multi-Omics of the Human Gut Microbiome in a Case Study of Familial Type 1 Diabetes.” Nature Microbiology 2 (October): 16180. 5. Plaza-Díaz, Julio, Ana I. Álvarez-Mercado, Carmen M. Ruiz-Marín, Iris Reina-Pérez, Alejandro J. Pérez-Alonso, María Belén Sánchez-Andujar, Pablo Torné, et al. 2019. “Association of Breast and Gut Microbiota Dysbiosis and the Risk of Breast Cancer: A Case-Control Clinical Study.” BMC Cancer 19 (1): 495. 6. Rouxel, Ophélie, Jennifer Da Silva, Lucie Beaudoin, Isabelle Nel, Céline Tard, Lucie Cagninacci, Badr Kiaf, et al. 2017. “Cytotoxic and Regulatory Roles of Mucosal-Associated Invariant T Cells in Type 1 Diabetes.” Nature Immunology 18 (12): 1321–31. |
| Experimental animal model (n=5) | 1. Bradley, C. Pierce, Fei Teng, Krysta M. Felix, Teruyuki Sano, Debdut Naskar, Katharine E. Block, Haochu Huang, Kenneth S. Knox, Dan R. Littman, and Hsin-Jung Joyce Wu. 2017. “Segmented Filamentous Bacteria Provoke Lung Autoimmunity by Inducing Gut-Lung Axis Th17 Cells Expressing Dual TCRs.” Cell Host & Microbe 22 (5): 697–704.e4. 2. Guo, Yanjie, Yane Qi, Xuefei Yang, Lihui Zhao, Shu Wen, Yinhui Liu, and Li Tang. 2016. “Association between Polycystic Ovary Syndrome and Gut Microbiota.” PloS One 11 (4): e0153196. 3. Mangalam, Ashutosh, Shailesh K. Shahi, David Luckey, Melissa Karau, Eric Marietta, Ningling Luo, Rok Seon Choung, et al. 2017. “Human Gut-Derived Commensal Bacteria Suppress CNS Inflammatory and Demyelinating Disease.” Cell Reports 20 (6): 1269–77. 4. Rothhammer, Veit, Ivan D. Mascanfroni, Lukas Bunse, Maisa C. Takenaka, Jessica E. Kenison, Lior Mayo, Chun-Cheih Chao, et al. 2016. “Type I Interferons and Microbial Metabolites of Tryptophan Modulate Astrocyte Activity and Central Nervous System Inflammation via the Aryl Hydrocarbon Receptor.” Nature Medicine 22 (6): 586–97. 5. Zhang, Husen, Xiaofeng Liao, Joshua B. Sparks, and Xin M. Luo. 2014. “Dynamics of Gut Microbiota in Autoimmune Lupus.” Applied and Environmental Microbiology 80 (24): 7551–60. |
| Previous data (n=5) | 1. Inamo, Jun. 2019. “Non-Causal Association of Gut Microbiome on the Risk of Rheumatoid Arthritis: A Mendelian Randomisation Study.” Annals of the Rheumatic Diseases. https://doi.org/10.1136/annrheumdis-2019-216565. 2. Montassier, Emmanuel, Laureline Berthelot, and Jean-Paul Soulillou. 2018. “Are the Decrease in Circulating Anti-α1,3-Gal IgG and the Lower Content of Galactosyl Transferase A1 in the Microbiota of Patients with Multiple Sclerosis a Novel Environmental Risk Factor for the Disease?” Molecular Immunology 93 (January): 162–65. 3. Rojo, David, Arancha Hevia, Rafael Bargiela, Patricia López, Adriana Cuervo, Sonia González, Ana Suárez, et al. 2015. “Ranking the Impact of Human Health Disorders on Gut Metabolism: Systemic Lupus Erythematosus and Obesity as Study Cases.” Scientific Reports 5 (February): 8310. 4. Thomas, Andrew Maltez, Paolo Manghi, Francesco Asnicar, Edoardo Pasolli, Federica Armanini, Moreno Zolfo, Francesco Beghini, et al. 2019. “Metagenomic Analysis of Colorectal Cancer Datasets Identifies Cross-Cohort Microbial Diagnostic Signatures and a Link with Choline Degradation.” Nature Medicine 25 (4): 667–78. 5. Xu, Kehan, and Bo Jiang. 2017. “Analysis of Mucosa-Associated Microbiota in Colorectal Cancer.” Medical Science Monitor: International Medical Journal of Experimental and Clinical Research 23 (September): 4422–30. |
