# Supplementary material for: Reproducible and Opposing Microbiome Signatures Distinguish Autoimmune Diseases and Cancers: A Systematic Review and Meta-Analysis
Source: Research Square preprint supplement (doi:10.21203/rs.3.rs-1195626/v1), 2021-12-29
Supplement: Supplementary file 2 [file 9596a21527be9cf2a9c50c5b.docx]

**Supplementary Table 1.** Electronic database search strategy to identify published reports on cancer- and autoimmune-microbiome studies

| Database | Outcome | Search build |
| --- | --- | --- |
| Pubmed | Autoimmune diseases | ("Microbiota"[Mesh] OR "Gastrointestinal Microbiome"[Mesh] OR " Metagenome "[Mesh]) AND "Autoimmune Diseases"[Mesh] |
|  | Cancer | ("Microbiota"[Mesh] OR "Gastrointestinal Microbiome"[Mesh] OR " Metagenome "[Mesh]) AND "Neoplasms"[Mesh] |
| Web of science and EMBAS | Autoimmune diseases | #1 TI = (microbiota* OR microflora* OR microbial communit* OR microbiome* OR metagenom* OR microbe*)  #2 TI = (autoimmun* OR sjogren* OR “sicca Syndrome” OR “multiple sclerosis” OR “type 1 diabetes” OR “type-1 diabetes” OR “T1D” OR glomerulonephritis OR graves* OR “addison disease” OR “autoimmune hemolytic anemia” OR “anti-glomerular basement membrane disease” OR goodpasture* OR vasculitis OR churg* OR Polyangiitis OR antiphospholipid OR “juvenile arthritis” OR “rheumatoid arthritis” OR “felty syndrome” OR “rheumatoid vasculitis” OR encephalitis OR myasthenia OR polyradiculoneuropathy OR stiff* OR “birdshot chorioretinopathy” OR herpetiformis OR “systemic lupus erythematosus” OR “libman-sacks sisease” OR “lupus nephritis” OR “sympathetic ophthalmia” OR “bullous pemphigoid” OR pemphigus OR “idiopathic thrombocytopenic purpura”)  #3 #1 AND #2 |
|  | Cancer | #1 TI = (microbiota* OR microflora* OR microbial comunit* OR microbiome* OR metagenom* OR microbe*)  #2 TI = (neoplasm* OR neoplasia OR tumor* OR cancer* OR malignanc* OR malignant*)  #3 #1 AND #2 |
