# Supplementary material for: Reproducible and Opposing Microbiome Signatures Distinguish Autoimmune Diseases and Cancers: A Systematic Review and Meta-Analysis
Source: Research Square preprint supplement (doi:10.21203/rs.3.rs-1195626/v1), 2021-12-29
Supplement: Supplementary file 3 [file ab6487107ad87fa65ad414ce.docx]

**Supplementary Table 5.** Characteristics of included studies

| Study | Country | Disease | Disease type | Disease diagnosis | Specimen | Number of cases | Numbber of control | Age of cases | Age of control | Sequencing type | Publicly available sequencing data |
| --- | --- | --- | --- | --- | --- | --- | --- | --- | --- | --- | --- |
| Huang S, 2019 | China | Pemphigus vulgaris | Autoimmune | clinical manifestations, histopathological evaluation and direct immunofluorescence | stool | 18 | 14 | 45.78±13.45 years | 44.57±14.72 years | 16s | No |
| Harbison JE, 2019 | Australia | Type 1 diabetes | Autoimmune | Not specified | stool | 29 | 41 | 10.7 (5.3‐16.3) years | 11.5 (5.1‐26.7) | 16s | No |
| Wei F, 2019 | China | Systemic lupus erythematosus | Autoimmune | ACR criteria | stool | 14 | 16 | 40.71±13.85 years | 38.63±14.50 years | 16s | No |
| Forbes JD, 2018 | Canada | Multiple sclerosis | Autoimmune | McDonald criteria | stool | 19 | 23 | 47.3 years | 32.4 years | 16s | Yes |
| Forbes JD, 2018 | Canada | Rheumatoid Arthritis | Autoimmune | ACR criteria | stool | 21 |  | 62.3 years | 32.4 years | 16s | Yes |
| Vatanen T, 2018 | USA, Sweeden, Germany, Finland | Type 1 diabetes | Autoimmune | ADA criteria | stool | 101 | 415 | 3 months to 5 years | 3 months to 5 years | Shotgun | Yes |
| Stewart CJ, 2018 | USA, Sweeden, Germany, Finland | Type 1 diabetes | Autoimmune | ADA criteria | stool | 91 | 91 | 3 months to 5 years | 3 months to 5 years | 16s | Yes |
| Picchianti-Diamanti A, 2018 | Italy | Rheumatoid Arthritis | Autoimmune | ACR/EULAR criteria | stool | 11 | 10 | 55.7 years | not specified | 16s | No |
| Ishaq HM, 2018 | China | Graves' Disease | Autoimmune | CSE criteria | stool | 10 | 10 | 35-50 years | 35-50 years | 16s | No |
| Leiva-Gea I, 2018 | Spain | Type 1 diabetes | Autoimmune | ADA criteria | stool | 15 | 13 | 12.56 ± 3.59 years | 12.25 ± 2.92 years | 16s | No |
| Cinek O, 2018 | Azerbaijan, Jordan, Nigeria, and Sudan | Type 1 diabetes | Autoimmune | WHO glycaemic criteria | stool | 73 | 103 | 3-19 years | 3-19 years | 16s | Yes |
| Huang Y, 2018 | China | Type 1 diabetes | Autoimmune | ADA criteria | stool | 12 | 10 | 22.58 ± 2.24 years | 25.10 ± 0.41 years | 16s | No |
| Salamon D, 2018 | Poland | Type 1 diabetes | Autoimmune | Not specified | stool | 22 | 23 | 36 (31–47) years | 37 (31–48) years | 16s | No |
| de Groot PF, 2017 | The Netherlands | Type 1 diabetes | Autoimmune | Not specified | stool | 45 | 35 | 35 ± 9.0 years | 33 ± 13 years | 16s | No |
| Singh H, 2017 | USA | Type 1 diabetes | Autoimmune | ADA criteria | stool | 99 | 106 | 14.5 years | 13.9 years | 16s | No |
| Wen C, 2017 | China | Ankylosing spondylitis | Autoimmune | Modified New York criteria | stool | 97 | 114 | 14-71 years | 23-70 years | shotgun | No |
| Breban M, 2017 | France | Spondyloarthritis | Autoimmune | ASAS criteria | stool | 49 | 18 | 48±13 years | 37±10.4 years | 16s | No |
| Breban M, 2017 | France | Rheumatoid Arthritis | Autoimmune | RCR criteria | stool | 17 |  | 65.5±11.6 years | 37±10.4 years | 16s | No |
| Breban M, 2017 | France | Spondyloarthritis | Autoimmune | ASAS criteria | stool | 38 | 51 | 53±9.8 years | 54±8.6 years | 16s | No |
| Breban M, 2017 | France | Rheumatoid Arthritis | Autoimmune | RCR criteria | stool | 11 |  | 56±19.5 years | 37±10.4 years | 16s | No |
| Aggarwal A, 2017 | India | enthesitis‐related arthritis | Autoimmune | ILAR criteria | stool | 33 | 14 | 15 (5–10) years | 13 (5–22) years | 16s | No |
| Jangi S, 2016 | USA | Multiple sclerosis | Autoimmune | Not specified | stool | 60 | 43 | 49.7±8.50 years | 42.2±9.61 years | 16s | Yes |
| Chen J, 2016 | USA | Multiple sclerosis | Autoimmune | McDonald criteria | stool | 31 | 36 | 42.9 ± 10.6 years | 40.3 ± 7.3 | 16s | No |
| Qi CJ, 2016 | China | Type 1 diabetes | Autoimmune | ADA criteria | stool | 15 | 15 | 11.4 ± 3.0 years | 10.5 ± 1.5 years | 16s | No |
| Tremlett H, 2016 | USA | Multiple sclerosis | Autoimmune | Not specified | stool | 18 | 17 | 12.5 (4-17) years | 13.5 (9-18) years | 16s | No |
| Chen J, 2016 | USA | Rheumatoid Arthritis | Autoimmune | ACR criteria | stool | 40 | 32 | 55.7 years | 53.0 years | 16s | Yes |
| Stewart CJ, 2017 | UK | Type 1 diabetes | Autoimmune | Not specified | stool | 10 | 10 | 27±2 years | 27±2 years | 16s | No |
| Tejesvi MV, 2016 | Finland | Juvenile idiopathic arthritis | Autoimmune | Not specified | stool | 30 | 27 | 6.2 years | 5.4 years | 16s | Yes |
| Miyake S, 2015 | Japan | Multiple sclerosis | Autoimmune | McDonald criteria | stool | 20 | 50 | 36.0 ± 7.2 years | 27.2 ± 9.2 years | 16s | Yes |
| Alkanani AK, 2015 | USA | Type 1 diabetes | Autoimmune | Not specified | stool | 35 | 23 | 11 (2–20) years | 12 (4–24) years | 16s | No |
| Stoll ML, 2014 | USA | enthesitis‐related arthritis | Autoimmune | ILAR criteria | stool | 25 | 13 | 13.0 (7.0 to 19.0) years | 13.0 (5.8 to 18.0) years | 16s | No |
| Hevia A, 2014 | Spain | Systemic lupus erythematosus | Autoimmune | ACR criteria | stool | 20 | 20 | 49.2±10.7 years | 46.9±8.6 years | 16s | No |
| Mejía-León ME, 2014 | Maxico | Type 1 diabetes | Autoimmune | ADA criteria | stool | 21 | 8 | 12.3 years | 11 years | 16s | No |
| Wei, 2020 | China | Autoimmune hepatitis | Autoimmune | IAIHG criteria | stool | 119 | 132 | 52(19-72) years | 47.5 (25-75) years | 16s | No |
| Yang, 2019 | China | Rheumatoid Arthritis | Autoimmune | ACR criteria | stool | 66 | 60 | not specified | not specified | 16s | Yes |
| Gong, 2019 | China | Anti‐NMDAR encephalitis | Autoimmune | Not specified | stool | 30 | 12 | 29-32 years | 30.4±10.5 years | 16s | No |
| Reynders, 2020 | Belgium | Multiple sclerosis | Autoimmune | McDonald criteria | stool | 98 | 120 | 48 years (median) | 49 years (median) | 16s | No |
| Choileáin, 2020 | USA | Multiple sclerosis | Autoimmune | Not specified | stool | 26 | 39 | 42 years | 45 years | 16s | Yes |
| Shi, 2019 | China | Graves’ orbitopathy | Autoimmune | EUGOGO criteria | stool | 33 | 32 | 46 years | 43 years | 16s | No |
| van der Meulen, 2019 | The Netherlands | Primary Sjögren's syndrome | Autoimmune | ACR/EULAR criteria | stool | 39 | 965 | 55±12 years | 45±13 years | 16s | No |
| van der Meulen, 2019 | The Netherlands | Systemic lupus erythematosus | Autoimmune | SLICC criteria | stool | 30 |  | 47±14 years | 45±13 years | 16s | No |
| Sheng-Xiao, 2019 | China | Systemic lupus erythematosus | Autoimmune | Not specified | stool | 92 | 217 | not specified | not specified | 16s | No |
| Sims TT, 2019 | USA | Cervical cancer | Cancer | Biopsy | stool | 42 | 46 | 48.9 years | 48.9 years | 16S | Yes |
| Liang W, 2019 | China | Gastric cancer | Cancer | Endoscopy and histology | stool | 20 | 22 | 53.4 years | 52.3 years | 16S | No |
| Yachida S, 2019 | Japan | Colorectal cancer | Cancer | Endoscopy and histology | stool | 251 | 258 | not specified | not specified | Shotgun | Yes |
| Zhuang H, 2019 | China | Lung cancer | Cancer | Histology | stool | 30 | 30 | 61 years | 50 years | 16S | Yes |
| Saito K, 2019 | Japan | Colorectal carcinoma | Cancer | Colonoscopy | colonoscopy aspirates | 47 | 10 | 66 years | 58 years | 16S | No |
| Feng J, 2019 | China | Thyroid papillary cancer | Cancer | Ultrasonography and histopathology | stool | 34 | 40 | 48 years | 46 years | 16S | Yes |
| Qi YF, 2019 | China | Gastric adenocarcinoma | Cancer | Pathology | stool | 116 | 88 | 45.58±8.86 years | 58.06±11.24 years | 16S | Yes |
| Hannigan GD, 2018 | USA | Colorectal carcinoma | Cancer | Colonoscopy and histology | stool | 30 | 30 | not specified | not specified | 16S | Yes |
| Zhang Y, 2018 | China | Colorectal carcinoma | Cancer | Colonoscopy | stool | 130 | 130 | 60 years | 58.6 years | 16S | No |
| Alanee S, 2019 | USA | Prostate cancer | Cancer | Pathology | stool | 14 | 16 | not specified | not specified | 16S | No |
| Zhu J, 2018 | China | Breast cancer | Cancer | Pathology | stool | 43 | 90 | 51 years | 49 years | shotgun | No |
| Ren Z, 2019 | China | Hepatocellular carcinoma (liver cancer) | Cancer | Histology | stool | 75 | 75 | 48 years | 49 years | 16S | Yes |
| Youssef O, 2018 | Finland | GIT neoplasia | Cancer | Surgery | stool | 63 | 13 | 70.4 years | 43.9 years | 16S | No |
| Allali I, 2018 | Morocco | Colorectal cancer | Cancer | Not specified | stool | 11 | 12 | 52.8 years | 49.3 years | 16S | No |
| Mei QX, 2018 | China | Pancreatic ductal adenocarcinoma | Cancer | Imaging and pathology | duodenal content | 14 | 14 | 56.8 years | 55.4 years | 16S | Yes |
| Pushalkar S, 2018 | USA | Pancreatic ductal adenocarcinoma | Cancer | Not specified | stool | 32 | 31 | not specified | not specified | 16S | Yes |
| Castaño-Rodríguez N, 2017 | China | Gastric cancer | Cancer | International Classification of Diseases | gastric biopsy | 12 | 20 | 56.3 years | 53.1 years | 16S | Yes |
| Golombos DM, 2018 | USA | Prostate cancer | Cancer | Imaging | stool | 12 | 8 | 63 years | 66 years | shotgun | No |
| Hale VL, 2017 | USA | Colorectal adenoma | Cancer | Colonoscopy and histology | stool | 233 | 547 | 66.5 years | 66.5 years | 16S | Yes |
| Vogtmann E, 2016 | USA | Colorectal cancer | Cancer | Colonoscopy | stool | 52 | 52 | 61.8 years | 61.2 years | shotgun | Yes |
| Jo HJ, 2016 | South Korea | Gastric cancer | Cancer | Endoscopy and histology | gastric antrum mucosa | 34 | 29 | 58.7 years | 58.4 years | 16S | Yes |
| Kasai C, 2016 | Japan | Colorectal cancer | Cancer | Colonoscopy | stool | 6 | 6 | 54 years | 50.3 years | 16S | No |
| Nakatsu G, 2015 | China | Colorectal cancer | Cancer | Colonoscopy and histology | colonic mucosal biopsy | 52 | 61 | 60 years | 67 years | 16S | Yes |
| Yu J, 2017 | China, Denmark | Colorectal cancer | Cancer | AJCC | stool | 74 | 54 | 67 years | 63 years | shotgun | No |
| Feng Q, 2015 | Austria | Colorectal cancer | Cancer | AJCC | stool | 46 | 57 | 66 years | 66 years | shotgun | Yes |
| Zeller G, 2014 | France | Colorectal cancer | Cancer | Colonoscopy | stool | 53 | 61 | not specified | not specified | 16S | Yes |
| Zackular JP, 2014 | USA, Canada | Colorectal cancer | Cancer | Colonoscopy and biopsy | stool | 30 | 30 | 59.4 years | 55.3 years | 16S | Yes |
| Mira-Pascual L, 2015 | Spain | Colorectal cancer | Cancer | Colonoscopy | stool | 11 | 10 | 71.1 years | 52.6 years | 16S | Yes |
| Ahn J, 2013 | USA | Colorectal cancer | Cancer | Histology | stool | 47 | 94 | 62.9 years | 58.5 years | 16S | No |
| Weir TL, 2013 | USA | Colorectal cancer | Cancer | Not specified | stool | 10 | 11 | 63.7 years | 40.72 years | 16S | Yes |
| Wu N, 2013 | China | Colorectal cancer | Cancer | Colonoscopy | stool | 53 | 213 | 60.1 years | 66.9 years | 16S | Yes |
| Chen HM, 2013 | China | Colorectal cancer | Cancer | Pathology | stool | 47 | 47 | 52.2 years | 51.8 years | 16S | No |
| Sanapareddy N, 2012 | USA | Colorectal adenoma | Cancer | Pathology | rectal mucosal surface | 33 | 38 | 57.45 years | 55.7 years | 16S | Yes |
| Wang T, 2012 | China | Colorectal cancer and carcinoma | Cancer | Histology | stool | 46 | 56 | 60 years | 49 years | 16S | Yes |
| Half 2019, 2019 | USA | Pancreatic cancer | Cancer | Histology | stool | 30 | 13 | 68.9 years | 59 years | 16S | Yes |
| Qinsong, 2019 | China | Colorectal cancer | Cancer | Pathology | stool | 67 | 30 | 62.81 years | 50.96 years | 16S | No |
| Gunathilake , 2019 | Korea | Gastric cancer | Cancer | Histology | gastric mucosa | 268 | 288 | 51.53 years | 53.68 years | 16S | No |
| Sonia, 2019 | Italy | Colorectal carcinoma | Cancer | Colonoscopy | stool | 29 | 24 | not specified | not specified | shotgun | Yes |
| Tzu-Wei, 2019 | China | Colorectal cancer | Cancer | Colonoscopy | stool | 62 | 104 | 61 years | 61 years | 16S | Yes |
| Zhongqiu, 2019 | China | Cervical cancer | Cancer | Pathology | stool | 8 | 5 | 59.5 years | not specified | 16S | Yes |
| Yang, 2019 | China | Colorectal cancer and carcinoma | Cancer | Pathology | stool | 50 | 50 | not specified | not specified | 16S | No |
| Gao, 2015 | China | Colorectal cancer | Cancer | Not specified | colorectal mucosa surface samples | 31 | 30 | 67 years | 70 years | 16S | Yes |
| Chen, 2012 | China | Colorectal carcinoma | Cancer | Not specified | stool | 46 | 56 | not specified | not specified | 16S | Yes |
| Gantuya, 2020 | Mongolia | Gastric cancer | Cancer | Histology | gastric mucosa | 48 | 20 | not specified | not specified | 16S | No |
| Virinder, 2020 | Iran, Finland | Colorectal cancer | Cancer | Not specified | stool | 83 | 60 | 65.9 years | 58.77 years | 16S | No |
| Total |  |  |  |  |  | 4208 | 5957 |  |  |  |  |
