# Supplementary material for: Reproducible and Opposing Microbiome Signatures Distinguish Autoimmune Diseases and Cancers: A Systematic Review and Meta-Analysis
Source: Research Square preprint supplement (doi:10.21203/rs.3.rs-1195626/v1), 2021-12-29
Supplement: Supplementary file 4 [file c50689283925e9e1c267f3e0.docx]

**Supplementary Table 3.** Articles included in this study (n=82).

| 1. Aggarwal, A., Sarangi, A. N., Gaur, P., Shukla, A., & Aggarwal, R. (2017). Gut microbiome in children with enthesitis-related arthritis in a developing country and the effect of probiotic administration. In Clinical & Experimental Immunology (Vol. 187, Issue 3, pp. 480–489). <https://doi.org/10.1111/cei.12900> 2. Ahn, J., Sinha, R., Pei, Z., Dominianni, C., Wu, J., Shi, J., Goedert, J. J., Hayes, R. B., & Yang, L. (2013). Human gut microbiome and risk for colorectal cancer. Journal of the National Cancer Institute, 105(24), 1907–1911. 3. Alanee, S., El-Zawahry, A., Dynda, D., Dabaja, A., McVary, K., Karr, M., & Braundmeier-Fleming, A. (2019). A prospective study to examine the association of the urinary and fecal microbiota with prostate cancer diagnosis after transrectal biopsy of the prostate using 16sRNA gene analysis. In The Prostate (Vol. 79, Issue 1, pp. 81–87). <https://doi.org/10.1002/pros.23713> 4. Alkanani, A. K., Hara, N., Gottlieb, P. A., Ir, D., Robertson, C. E., Wagner, B. D., Frank, D. N., & Zipris, D. (2015). Alterations in Intestinal Microbiota Correlate With Susceptibility to Type 1 Diabetes. Diabetes, 64(10), 3510–3520. 5. Allali, I., Boukhatem, N., Bouguenouch, L., Hardi, H., Abir Boudouaya, H., Belen Cadenas, M., Ouldim, K., Amzazi, S., Andrea Azcarate-Peril, M., & Ghazal, H. (2018). Gut microbiome of Moroccan colorectal cancer patients. In Medical Microbiology and Immunology (Vol. 207, Issues 3-4, pp. 211–225). <https://doi.org/10.1007/s00430-018-0542-5> 6. Breban, M., Tap, J., Leboime, A., Said-Nahal, R., Langella, P., Chiocchia, G., Furet, J.-P., & Sokol, H. (2017). Faecal microbiota study reveals specific dysbiosis in spondyloarthritis. Annals of the Rheumatic Diseases, 76(9), 1614–1622. 7. Castaño-Rodríguez, N., Goh, K.-L., Fock, K. M., Mitchell, H. M., & Kaakoush, N. O. (2017). Dysbiosis of the microbiome in gastric carcinogenesis. In Scientific Reports (Vol. 7, Issue 1). <https://doi.org/10.1038/s41598-017-16289-2> 8. Chen, H.-M., Yu, Y.-N., Wang, J.-L., Lin, Y.-W., Kong, X., Yang, C.-Q., Yang, L., Liu, Z.-J., Yuan, Y.-Z., Liu, F., Wu, J.-X., Zhong, L., Fang, D.-C., Zou, W., & Fang, J.-Y. (2013). Decreased dietary fiber intake and structural alteration of gut microbiota in patients with advanced colorectal adenoma. In The American Journal of Clinical Nutrition (Vol. 97, Issue 5, pp. 1044–1052). <https://doi.org/10.3945/ajcn.112.046607> 9. Chen, J., Chia, N., Kalari, K. R., Yao, J. Z., Novotna, M., Paz Soldan, M. M., Luckey, D. H., Marietta, E. V., Jeraldo, P. R., Chen, X., Weinshenker, B. G., Rodriguez, M., Kantarci, O. H., Nelson, H., Murray, J. A., & Mangalam, A. K. (2016). Multiple sclerosis patients have a distinct gut microbiota compared to healthy controls. Scientific Reports, 6, 28484. 10. Chen, J., Wright, K., Davis, J. M., Jeraldo, P., Marietta, E. V., Murray, J., Nelson, H., Matteson, E. L., & Taneja, V. (2016). An expansion of rare lineage intestinal microbes characterizes rheumatoid arthritis. Genome Medicine, 8(1), 43. 11. Chen, W., Liu, F., Ling, Z., Tong, X., & Xiang, C. (2012). Human Intestinal Lumen and Mucosa-Associated Microbiota in Patients with Colorectal Cancer. In PLoS ONE (Vol. 7, Issue 6, p. e39743). <https://doi.org/10.1371/journal.pone.0039743> 12. Choileáin, S. N., Kleinewietfeld, M., Raddassi, K., Hafler, D. A., Ruff, W. E., & Longbrake, E. E. (2020). CXCR3+ T cells in multiple sclerosis correlate with reduced diversity of the gut microbiome. Journal of Translational Autoimmunity, 3, 100032. 13. Cinek, O., Kramna, L., Mazankova, K., Odeh, R., Alassaf, A., Ibekwe, M. U., Ahmadov, G., Elmahi, B. M. E., Mekki, H., Lebl, J., & Abdullah, M. A. (2018). The bacteriome at the onset of type 1 diabetes: A study from four geographically distant African and Asian countries. Diabetes Research and Clinical Practice, 144, 51–62. 14. de Groot, P. F., Belzer, C., Aydin, Ö., Levin, E., Levels, J. H., Aalvink, S., Boot, F., Holleman, F., van Raalte, D. H., Scheithauer, T. P., Simsek, S., Schaap, F. G., Olde Damink, S. W. M., Roep, B. O., Hoekstra, J. B., de Vos, W. M., & Nieuwdorp, M. (2017). Distinct fecal and oral microbiota composition in human type 1 diabetes, an observational study. PloS One, 12(12), e0188475. 15. Feng, J., Zhao, F., Sun, J., Lin, B., Zhao, L., Liu, Y., Jin, Y., Li, S., Li, A., & Wei, Y. (2019). Alterations in the gut microbiota and metabolite profiles of thyroid carcinoma patients. In International Journal of Cancer (Vol. 144, Issue 11, pp. 2728–2745). <https://doi.org/10.1002/ijc.32007> 16. Feng, Q., Liang, S., Jia, H., Stadlmayr, A., Tang, L., Lan, Z., Zhang, D., Xia, H., Xu, X., Jie, Z., Su, L., Li, X., Li, X., Li, J., Xiao, L., Huber-Schönauer, U., Niederseer, D., Xu, X., Al-Aama, J. Y., … Wang, J. (2015). Gut microbiome development along the colorectal adenoma-carcinoma sequence. Nature Communications, 6, 6528. 17. Forbes, J. D., Chen, C.-Y., Knox, N. C., Marrie, R.-A., El-Gabalawy, H., de Kievit, T., Alfa, M., Bernstein, C. N., & Van Domselaar, G. (2018). A comparative study of the gut microbiota in immune-mediated inflammatory diseases—does a common dysbiosis exist? In Microbiome (Vol. 6, Issue 1). <https://doi.org/10.1186/s40168-018-0603-4> 18. Gantuya, B., El Serag, H. B., Matsumoto, T., Ajami, N. J., Uchida, T., Oyuntsetseg, K., Bolor, D., & Yamaoka, Y. (2020). Gastric mucosal microbiota in a Mongolian population with gastric cancer and precursor conditions. In Alimentary Pharmacology & Therapeutics (Vol. 51, Issue 8, pp. 770–780). <https://doi.org/10.1111/apt.15675> 19. Gao, Z., Guo, B., Gao, R., Zhu, Q., & Qin, H. (2015). Microbiota disbiosis is associated with colorectal cancer. In Frontiers in Microbiology (Vol. 6). <https://doi.org/10.3389/fmicb.2015.00020\> 20. Golombos, D. M., Ayangbesan, A., O’Malley, P., Lewicki, P., Barlow, L., Barbieri, C. E., Chan, C., DuLong, C., Abu-Ali, G., Huttenhower, C., & Scherr, D. S. (2018). The Role of Gut Microbiome in the Pathogenesis of Prostate Cancer: A Prospective, Pilot Study. In Urology (Vol. 111, pp. 122–128). <https://doi.org/10.1016/j.urology.2017.08.039> 21. Gong, X., Liu, X., Li, C., Chen, C., Lin, J., Li, A., An, D., Zhou, D., & Hong, Z. (2019). Alterations in the human gut microbiome in anti-N-methyl-D-aspartate receptor encephalitis. Annals of Clinical and Translational Neurology, 6(9), 1771–1781. 22. Gunathilake, M. N., Lee, J., Choi, I. J., Kim, Y.-I., Ahn, Y., Park, C., & Kim, J. (2019). Association between the relative abundance of gastric microbiota and the risk of gastric cancer: a case-control study. In Scientific Reports (Vol. 9, Issue 1). <https://doi.org/10.1038/s41598-019-50054-x> 23. Hale, V. L., Chen, J., Johnson, S., Harrington, S. C., Yab, T. C., Smyrk, T. C., Nelson, H., Boardman, L. A., Druliner, B. R., Levin, T. R., Rex, D. K., Ahnen, D. J., Lance, P., Ahlquist, D. A., & Chia, N. (2017). Shifts in the Fecal Microbiota Associated with Adenomatous Polyps. In Cancer Epidemiology Biomarkers & Prevention (Vol. 26, Issue 1, pp. 85–94). <https://doi.org/10.1158/1055-9965.epi-16-0337> 24. Half, E., Keren, N., Reshef, L., Dorfman, T., Lachter, I., Kluger, Y., Reshef, N., Knobler, H., Maor, Y., Stein, A., Konikoff, F. M., & Gophna, U. (2019). Fecal microbiome signatures of pancreatic cancer patients. In Scientific Reports (Vol. 9, Issue 1). <https://doi.org/10.1038/s41598-019-53041-4> 25. Hannigan, G. D., Duhaime, M. B., Ruffin, M. T., Koumpouras, C. C., & Schloss, P. D. (2018). Diagnostic Potential and Interactive Dynamics of the Colorectal Cancer Virome. In mBio (Vol. 9, Issue 6). <https://doi.org/10.1128/mbio.02248-18> 26. Harbison, J. E., Roth-Schulze, A. J., Giles, L. C., Tran, C. D., Ngui, K. M., Penno, M. A., Thomson, R. L., Wentworth, J. M., Colman, P. G., Craig, M. E., Morahan, G., Papenfuss, A. T., Barry, S. C., Harrison, L. C., & Couper, J. J. (2019). Gut microbiome dysbiosis and increased intestinal permeability in children with islet autoimmunity and type 1 diabetes: A prospective cohort study. Pediatric Diabetes, 20(5), 574–583. 27. Hevia, A., Milani, C., López, P., Cuervo, A., Arboleya, S., Duranti, S., Turroni, F., González, S., Suárez, A., Gueimonde, M., Ventura, M., Sánchez, B., & Margolles, A. (2014). Intestinal dysbiosis associated with systemic lupus erythematosus. mBio, 5(5), e01548–14. 28. Huang, S., Mao, J., Zhou, L., Xiong, X., & Deng, Y. (2019). The imbalance of gut microbiota and its correlation with plasma inflammatory cytokines in pemphigus vulgaris patients. Scandinavian Journal of Immunology, 90(3), e12799. 29. Huang, Y., Li, S.-C., Hu, J., Ruan, H.-B., Guo, H.-M., Zhang, H.-H., Wang, X., Pei, Y.-F., Pan, Y., & Fang, C. (2018). Gut microbiota profiling in Han Chinese with type 1 diabetes. Diabetes Research and Clinical Practice, 141, 256–263. 30. Ishaq, H. M., Mohammad, I. S., Shahzad, M., Ma, C., Raza, M. A., Wu, X., Guo, H., Shi, P., & Xu, J. (2018). Molecular Alteration Analysis of Human Gut Microbial Composition in Graves’ disease Patients. International Journal of Biological Sciences, 14(11), 1558–1570. 31. Jangi, S., Gandhi, R., Cox, L. M., Li, N., von Glehn, F., Yan, R., Patel, B., Mazzola, M. A., Liu, S., Glanz, B. L., Cook, S., Tankou, S., Stuart, F., Melo, K., Nejad, P., Smith, K., Topçuolu, B. D., Holden, J., Kivisäkk, P., … Weiner, H. L. (2016). Alterations of the human gut microbiome in multiple sclerosis. Nature Communications, 7, 12015. 32. Jo, H. J., Kim, J., Kim, N., Park, J. H., Nam, R. H., Seok, Y.-J., Kim, Y.-R., Kim, J. S., Kim, J. M., Kim, J. M., Lee, D. H., & Jung, H. C. (2016). Analysis of Gastric Microbiota by Pyrosequencing: Minor Role of Bacteria Other Than Helicobacter pylori in the Gastric Carcinogenesis. Helicobacter, 21(5), 364–374. 33. Kasai, C., Sugimoto, K., Moritani, I., Tanaka, J., Oya, Y., Inoue, H., Tameda, M., Shiraki, K., Ito, M., Takei, Y., & Takase, K. (2016). Comparison of human gut microbiota in control subjects and patients with colorectal carcinoma in adenoma: Terminal restriction fragment length polymorphism and next-generation sequencing analyses. In Oncology Reports (Vol. 35, Issue 1, pp. 325–333). <https://doi.org/10.3892/or.2015.4398> 34. Leiva-Gea, I., Sánchez-Alcoholado, L., Martín-Tejedor, B., Castellano-Castillo, D., Moreno-Indias, I., Urda-Cardona, A., Tinahones, F. J., Fernández-García, J. C., & Queipo-Ortuño, M. I. (2018). Gut Microbiota Differs in Composition and Functionality Between Children With Type 1 Diabetes and MODY2 and Healthy Control Subjects: A Case-Control Study. In Diabetes Care (Vol. 41, Issue 11, pp. 2385–2395). <https://doi.org/10.2337/dc18-0253> 35. Liang, W., Yang, Y., Wang, H., Wang, H., Yu, X., Lu, Y., Shen, S., & Teng, L. (2019). Gut microbiota shifts in patients with gastric cancer in perioperative period. Medicine, 98(35), e16626. 36. Mei, Q.-X., Huang, C.-L., Luo, S.-Z., Zhang, X.-M., Zeng, Y., & Lu, Y.-Y. (2018). Characterization of the duodenal bacterial microbiota in patients with pancreatic head cancer vs. healthy controls. In Pancreatology (Vol. 18, Issue 4, pp. 438–445). <https://doi.org/10.1016/j.pan.2018.03.005> 37. Mejía-León, M. E., Petrosino, J. F., Ajami, N. J., Domínguez-Bello, M. G., & de la Barca, A. M. C. (2015). Fecal microbiota imbalance in Mexican children with type 1 diabetes. In Scientific Reports (Vol. 4, Issue 1). <https://doi.org/10.1038/srep03814> 38. Mira-Pascual, L., Cabrera-Rubio, R., Ocon, S., Costales, P., Parra, A., Suarez, A., Moris, F., Rodrigo, L., Mira, A., & Collado, M. C. (2015). Microbial mucosal colonic shifts associated with the development of colorectal cancer reveal the presence of different bacterial and archaeal biomarkers. In Journal of Gastroenterology (Vol. 50, Issue 2, pp. 167–179). <https://doi.org/10.1007/s00535-014-0963-x> 39. Miyake, S., Kim, S., Suda, W., Oshima, K., Nakamura, M., Matsuoka, T., Chihara, N., Tomita, A., Sato, W., Kim, S.-W., Morita, H., Hattori, M., & Yamamura, T. (2015). Dysbiosis in the Gut Microbiota of Patients with Multiple Sclerosis, with a Striking Depletion of Species Belonging to Clostridia XIVa and IV Clusters. PloS One, 10(9), e0137429. 40. Nakatsu, G., Li, X., Zhou, H., Sheng, J., Wong, S. H., Wu, W. K. K., Ng, S. C., Tsoi, H., Dong, Y., Zhang, N., He, Y., Kang, Q., Cao, L., Wang, K., Zhang, J., Liang, Q., Yu, J., & Sung, J. J. Y. (2015). Gut mucosal microbiome across stages of colorectal carcinogenesis. In Nature Communications (Vol. 6, Issue 1). <https://doi.org/10.1038/ncomms9727> 41. Picchianti-Diamanti, A., Panebianco, C., Salemi, S., Sorgi, M. L., Di Rosa, R., Tropea, A., Sgrulletti, M., Salerno, G., Terracciano, F., D’Amelio, R., Laganà, B., & Pazienza, V. (2018). Analysis of Gut Microbiota in Rheumatoid Arthritis Patients: Disease-Related Dysbiosis and Modifications Induced by Etanercept. International Journal of Molecular Sciences, 19(10). <https://doi.org/10.3390/ijms19102938> 42. Pushalkar, S., Hundeyin, M., Daley, D., Zambirinis, C. P., Kurz, E., Mishra, A., Mohan, N., Aykut, B., Usyk, M., Torres, L. E., Werba, G., Zhang, K., Guo, Y., Li, Q., Akkad, N., Lall, S., Wadowski, B., Gutierrez, J., Rossi, J. A. K., … Miller, G. (2018). The Pancreatic Cancer Microbiome Promotes Oncogenesis by Induction of Innate and Adaptive Immune Suppression. In Cancer Discovery (Vol. 8, Issue 4, pp. 403–416). <https://doi.org/10.1158/2159-8290.cd-17-1134> 43. Qi, C.-J., Zhang, Q., Yu, M., Xu, J.-P., Zheng, J., Wang, T., & Xiao, X.-H. (2016). Imbalance of Fecal Microbiota at Newly Diagnosed Type 1 Diabetes in Chinese Children. Chinese Medical Journal, 129(11), 1298–1304. 44. Qi, Y.-F., Sun, J.-N., Ren, L.-F., Cao, X.-L., Dong, J.-H., Tao, K., Guan, X.-M., Cui, Y.-N., & Su, W. (2019). Intestinal Microbiota Is Altered in Patients with Gastric Cancer from Shanxi Province, China. In Digestive Diseases and Sciences (Vol. 64, Issue 5, pp. 1193–1203). <https://doi.org/10.1007/s10620-018-5411-y> 45. Ren, Z., Li, A., Jiang, J., Zhou, L., Yu, Z., Lu, H., Xie, H., Chen, X., Shao, L., Zhang, R., Xu, S., Zhang, H., Cui, G., Chen, X., Sun, R., Wen, H., Lerut, J. P., Kan, Q., Li, L., & Zheng, S. (2019). Gut microbiome analysis as a tool towards targeted non-invasive biomarkers for early hepatocellular carcinoma. In Gut (Vol. 68, Issue 6, pp. 1014–1023). <https://doi.org/10.1136/gutjnl-2017-315084> 46. Reynders, T., Devolder, L., Valles-Colomer, M., Van Remoortel, A., Joossens, M., De Keyser, J., Nagels, G., D’hooghe, M., & Raes, J. (2020). Gut microbiome variation is associated to Multiple Sclerosis phenotypic subtypes. Annals of Clinical and Translational Neurology, 7(4), 406–419. 47. Saito, K., Koido, S., Odamaki, T., Kajihara, M., Kato, K., Horiuchi, S., Adachi, S., Arakawa, H., Yoshida, S., Akasu, T., Ito, Z., Uchiyama, K., Saruta, M., Xiao, J.-Z., Sato, N., & Ohkusa, T. (2019). Metagenomic analyses of the gut microbiota associated with colorectal adenoma. In PLOS ONE (Vol. 14, Issue 2, p. e0212406). <https://doi.org/10.1371/journal.pone.0212406> 48. Salamon, D., Sroka-Oleksiak, A., Kapusta, P., Szopa, M., Mrozinska, S., Ludwig-Slomczynska, A. H., Wolkow, P. P., Bulanda, M., Klupa, T., Malecki, M. T., & Others. (2018). Characteristics of gut microbiota in adult patients with type 1 and type 2 diabetes based on next-generation sequencing of the 16S rRNA gene fragment. Pol Arch Intern Med, 128(6), 336–343. 49. Sanapareddy, N., Legge, R. M., Jovov, B., McCoy, A., Burcal, L., Araujo-Perez, F., Randall, T. A., Galanko, J., Benson, A., Sandler, R. S., Rawls, J. F., Abdo, Z., Fodor, A. A., & Keku, T. O. (2012). Increased rectal microbial richness is associated with the presence of colorectal adenomas in humans. In The ISME Journal (Vol. 6, Issue 10, pp. 1858–1868). <https://doi.org/10.1038/ismej.2012.43> 50. Sarhadi, V., Lahti, L., Saberi, F., Youssef, O., Kokkola, A., Karla, T., Tikkanen, M., Rautelin, H., Puolakkainen, P., Salehi, R., & Knuutila, S. (2020). Gut Microbiota and Host Gene Mutations in Colorectal Cancer Patients and Controls of Iranian and Finnish Origin. In Anticancer Research (Vol. 40, Issue 3, pp. 1325–1334). <https://doi.org/10.21873/anticanres.14074> 51. Sheng, Q., Du, H., Cheng, X., Cheng, X., Tang, Y., Pan, L., Wang, Q., & Lin, J. (2019). Characteristics of fecal gut microbiota in patients with colorectal cancer at different stages and different sites. In Oncology Letters. <https://doi.org/10.3892/ol.2019.10841> 52. Shi, T.-T., Xin, Z., Hua, L., Zhao, R.-X., Yang, Y.-L., Wang, H., Zhang, S., Liu, W., & Xie, R.-R. (2019). Alterations in the intestinal microbiota of patients with severe and active Graves’ orbitopathy: a cross-sectional study. In Journal of Endocrinological Investigation (Vol. 42, Issue 8, pp. 967–978). <https://doi.org/10.1007/s40618-019-1010-9> 53. Sims, T. T., Colbert, L. E., Zheng, J., Delgado Medrano, A. Y., Hoffman, K. L., Ramondetta, L., Jazaeri, A., Jhingran, A., Schmeler, K. M., Daniel, C. R., & Klopp, A. (2019). Gut microbial diversity and genus-level differences identified in cervical cancer patients versus healthy controls. In Gynecologic Oncology (Vol. 155, Issue 2, pp. 237–244). <https://doi.org/10.1016/j.ygyno.2019.09.002> 54. Singh, H., Yu, Y., Suh, M.-J., Torralba, M. G., Stenzel, R. D., Tovchigrechko, A., Thovarai, V., Harkins, D. M., Rajagopala, S. V., Osborne, W., Cogen, F. R., Kaplowitz, P. B., Nelson, K. E., Madupu, R., & Pieper, R. (2017). Type 1 Diabetes: Urinary Proteomics and Protein Network Analysis Support Perturbation of Lysosomal Function. In Theranostics (Vol. 7, Issue 10, pp. 2704–2717). <https://doi.org/10.7150/thno.19679> 55. Stewart, C. J., Ajami, N. J., O’Brien, J. L., Hutchinson, D. S., Smith, D. P., Wong, M. C., Ross, M. C., Lloyd, R. E., Doddapaneni, H., Metcalf, G. A., Muzny, D., Gibbs, R. A., Vatanen, T., Huttenhower, C., Xavier, R. J., Rewers, M., Hagopian, W., Toppari, J., Ziegler, A.-G., … Petrosino, J. F. (2018). Temporal development of the gut microbiome in early childhood from the TEDDY study. Nature, 562(7728), 583–588. 56. Stewart, C. J., Nelson, A., Campbell, M. D., Walker, M., Stevenson, E. J., Shaw, J. A., Cummings, S. P., & West, D. J. (2017). Gut microbiota of Type 1 diabetes patients with good glycaemic control and high physical fitness is similar to people without diabetes: an observational study. Diabetic Medicine: A Journal of the British Diabetic Association, 34(1), 127–134. 57. Stoll, M. L., Kumar, R., Morrow, C. D., Lefkowitz, E. J., Cui, X., Genin, A., Cron, R. Q., & Elson, C. O. (2014). Altered microbiota associated with abnormal humoral immune responses to commensal organisms in enthesitis-related arthritis. Arthritis Research & Therapy, 16(6), 486. 58. Sun, Y., Chen, Q., Lin, P., Xu, R., He, D., Ji, W., Bian, Y., Shen, Y., Li, Q., Liu, C., Dong, K., Tang, Y.-W., Pei, Z., Yang, L., Lu, H., Guo, X., & Xiao, L. (2019). Characteristics of Gut Microbiota in Patients With Rheumatoid Arthritis in Shanghai, China. Frontiers in Cellular and Infection Microbiology, 9, 369. 59. Tarallo, S., Ferrero, G., Gallo, G., Francavilla, A., Clerico, G., Luc, A. R., Manghi, P., Thomas, A. M., Vineis, P., Segata, N., Pardini, B., Naccarati, A., & Cordero, F. (2019). Altered Fecal Small RNA Profiles in Colorectal Cancer Reflect Gut Microbiome Composition in Stool Samples. In mSystems (Vol. 4, Issue 5). <https://doi.org/10.1128/msystems.00289-19> 60. Tejesvi, M. V., Arvonen, M., Kangas, S. M., Keskitalo, P. L., Pirttilä, A. M., Karttunen, T. J., & Vähäsalo, P. (2016). Faecal microbiome in new-onset juvenile idiopathic arthritis. European Journal of Clinical Microbiology & Infectious Diseases: Official Publication of the European Society of Clinical Microbiology, 35(3), 363–370. 61. Tremlett, H., Fadrosh, D. W., Faruqi, A. A., Zhu, F., Hart, J., Roalstad, S., Graves, J., Lynch, S., Waubant, E., & the US Network of Pediatric MS Centers. (2016). Gut microbiota in early pediatric multiple sclerosis: a case−control study. In European Journal of Neurology (Vol. 23, Issue 8, pp. 1308–1321). <https://doi.org/10.1111/ene.13026> 62. van der Meulen, T. A., Harmsen, H. J. M., Vila, A. V., Kurilshikov, A., Liefers, S. C., Zhernakova, A., Fu, J., Wijmenga, C., Weersma, R. K., de Leeuw, K., Bootsma, H., Spijkervet, F. K. L., Vissink, A., & Kroese, F. G. M. (2019). Shared gut, but distinct oral microbiota composition in primary Sjögren’s syndrome and systemic lupus erythematosus. Journal of Autoimmunity, 97, 77–87. 63. Vatanen, T., Franzosa, E. A., Schwager, R., Tripathi, S., Arthur, T. D., Vehik, K., Lernmark, Å., Hagopian, W. A., Rewers, M. J., She, J.-X., Toppari, J., Ziegler, A.-G., Akolkar, B., Krischer, J. P., Stewart, C. J., Ajami, N. J., Petrosino, J. F., Gevers, D., Lähdesmäki, H., … Xavier, R. J. (2018). The human gut microbiome in early-onset type 1 diabetes from the TEDDY study. Nature, 562(7728), 589–594. 64. Vogtmann, E., Hua, X., Zeller, G., Sunagawa, S., Voigt, A. Y., Hercog, R., Goedert, J. J., Shi, J., Bork, P., & Sinha, R. (2016). Colorectal Cancer and the Human Gut Microbiome: Reproducibility with Whole-Genome Shotgun Sequencing. In PLOS ONE (Vol. 11, Issue 5, p. e0155362). <https://doi.org/10.1371/journal.pone.0155362> 65. Wang, T., Cai, G., Qiu, Y., Fei, N., Zhang, M., Pang, X., Jia, W., Cai, S., & Zhao, L. (2012). Structural segregation of gut microbiota between colorectal cancer patients and healthy volunteers. In The ISME Journal (Vol. 6, Issue 2, pp. 320–329). <https://doi.org/10.1038/ismej.2011.109> 66. Wang, Z., Wang, Q., Zhao, J., Gong, L., Zhang, Y., Wang, X., & Yuan, Z. (2019). Altered diversity and composition of the gut microbiome in patients with cervical cancer. In AMB Express (Vol. 9, Issue 1). <https://doi.org/10.1186/s13568-019-0763-z> 67. Wei, F., Xu, H., Yan, C., Rong, C., Liu, B., & Zhou, H. (2019). Changes of intestinal flora in patients with systemic lupus erythematosus in northeast China. PloS One, 14(3), e0213063. 68. Weir, T. L., Manter, D. K., Sheflin, A. M., Barnett, B. A., Heuberger, A. L., & Ryan, E. P. (2013). Stool Microbiome and Metabolome Differences between Colorectal Cancer Patients and Healthy Adults. In PLoS ONE (Vol. 8, Issue 8, p. e70803). <https://doi.org/10.1371/journal.pone.0070803> 69. Wei, Y., Li, Y., Yan, L., Sun, C., Miao, Q., Wang, Q., Xiao, X., Lian, M., Li, B., Chen, Y., Zhang, J., Li, Y., Huang, B., Li, Y., Cao, Q., Fan, Z., Chen, X., Fang, J.-Y., Gershwin, M. E., … Ma, X. (2020). Alterations of gut microbiome in autoimmune hepatitis. Gut, 69(3), 569–577. 70. Wen, C., Zheng, Z., Shao, T., Liu, L., Xie, Z., Le Chatelier, E., He, Z., Zhong, W., Fan, Y., Zhang, L., Li, H., Wu, C., Hu, C., Xu, Q., Zhou, J., Cai, S., Wang, D., Huang, Y., Breban, M., … Ehrlich, S. D. (2017). Quantitative metagenomics reveals unique gut microbiome biomarkers in ankylosing spondylitis. Genome Biology, 18(1), 142. 71. Wu, N., Yang, X., Zhang, R., Li, J., Xiao, X., Hu, Y., Chen, Y., Yang, F., Lu, N., Wang, Z., Luan, C., Liu, Y., Wang, B., Xiang, C., Wang, Y., Zhao, F., Gao, G. F., Wang, S., Li, L., … Zhu, B. (2013). Dysbiosis Signature of Fecal Microbiota in Colorectal Cancer Patients. In Microbial Ecology (Vol. 66, Issue 2, pp. 462–470). <https://doi.org/10.1007/s00248-013-0245-9> 72. Yachida, S., Mizutani, S., Shiroma, H., Shiba, S., Nakajima, T., Sakamoto, T., Watanabe, H., Masuda, K., Nishimoto, Y., Kubo, M., Hosoda, F., Rokutan, H., Matsumoto, M., Takamaru, H., Yamada, M., Matsuda, T., Iwasaki, M., Yamaji, T., Yachida, T., … Yamada, T. (2019). Metagenomic and metabolomic analyses reveal distinct stage-specific phenotypes of the gut microbiota in colorectal cancer. In Nature Medicine (Vol. 25, Issue 6, pp. 968–976). <https://doi.org/10.1038/s41591-019-0458-7> 73. Yang, T.-W., Lee, W.-H., Tu, S.-J., Huang, W.-C., Chen, H.-M., Sun, T.-H., Tsai, M.-C., Wang, C.-C., Chen, H.-Y., Huang, C.-C., Shiu, B.-H., Yang, T.-L., Huang, H.-T., Chou, Y.-P., Chou, C.-H., Huang, Y.-R., Sun, Y.-R., Liang, C., Lin, F.-M., … Lin, C.-C. (2019). Enterotype-based Analysis of Gut Microbiota along the Conventional Adenoma-Carcinoma Colorectal Cancer Pathway. In Scientific Reports (Vol. 9, Issue 1). https://doi.org/10.1038/s41598-019-45588-z 74. Yang, Y., Misra, B. B., Liang, L., Bi, D., Weng, W., Wu, W., Cai, S., Qin, H., Goel, A., Li, X., & Ma, Y. (2019). Integrated microbiome and metabolome analysis reveals a novel interplay between commensal bacteria and metabolites in colorectal cancer. In Theranostics (Vol. 9, Issue 14, pp. 4101–4114). <https://doi.org/10.7150/thno.35186> 75. Youssef, O., Lahti, L., Kokkola, A., Karla, T., Tikkanen, M., Ehsan, H., Carpelan-Holmström, M., Koskensalo, S., Böhling, T., Rautelin, H., Puolakkainen, P., Knuutila, S., & Sarhadi, V. (2018). Stool Microbiota Composition Differs in Patients with Stomach, Colon, and Rectal Neoplasms. In Digestive Diseases and Sciences (Vol. 63, Issue 11, pp. 2950–2958). <https://doi.org/10.1007/s10620-018-5190-5> 76. Yu, J., Feng, Q., Wong, S. H., Zhang, D., Liang, Q. yi, Qin, Y., Tang, L., Zhao, H., Stenvang, J., Li, Y., Wang, X., Xu, X., Chen, N., Wu, W. K. K., Al-Aama, J., Nielsen, H. J., Kiilerich, P., Jensen, B. A. H., Yau, T. O., … Wang, J. (2017). Metagenomic analysis of faecal microbiome as a tool towards targeted non-invasive biomarkers for colorectal cancer. In Gut (Vol. 66, Issue 1, pp. 70–78). <https://doi.org/10.1136/gutjnl-2015-309800> 77. Zackular, J. P., Rogers, M. A. M., Ruffin, M. T., 4th, & Schloss, P. D. (2014). The human gut microbiome as a screening tool for colorectal cancer. Cancer Prevention Research , 7(11), 1112–1121. 78. Zeller, G., Tap, J., Voigt, A. Y., Sunagawa, S., Kultima, J. R., Costea, P. I., Amiot, A., Böhm, J., Brunetti, F., Habermann, N., Hercog, R., Koch, M., Luciani, A., Mende, D. R., Schneider, M. A., Schrotz-King, P., Tournigand, C., Tran Van Nhieu, J., Yamada, T., … Bork, P. (2014). Potential of fecal microbiota for early-stage detection of colorectal cancer. Molecular Systems Biology, 10, 766. 79. Zhang, S.-X., Wang, J., Chen, J.-W., Zhang, M.-X., Zhang, Y.-F., Hu, F.-Y., Lv, Z.-Q., Gao, C., Li, Y.-F., & Li, X.-F. (2019). The level of peripheral regulatory T cells is linked to changes in gut commensal microflora in patients with systemic lupus erythematosus. Annals of the Rheumatic Diseases. <https://doi.org/10.1136/annrheumdis-2019-216504> 80. Zhang, Y., Yu, X., Yu, E., Wang, N., Cai, Q., Shuai, Q., Yan, F., Jiang, L., Wang, H., Liu, J., Chen, Y., Li, Z., & Jiang, Q. (2018). Changes in gut microbiota and plasma inflammatory factors across the stages of colorectal tumorigenesis: a case-control study. In BMC Microbiology (Vol. 18, Issue 1). <https://doi.org/10.1186/s12866-018-1232-6> 81. Zhuang, H., Cheng, L., Wang, Y., Zhang, Y.-K., Zhao, M.-F., Liang, G.-D., Zhang, M.-C., Li, Y.-G., Zhao, J.-B., Gao, Y.-N., Zhou, Y.-J., & Liu, S.-L. (2019). Dysbiosis of the Gut Microbiome in Lung Cancer. Frontiers in Cellular and Infection Microbiology, 9, 112. 82. Zhu, J., Liao, M., Yao, Z., Liang, W., Li, Q., Liu, J., Yang, H., Ji, Y., Wei, W., Tan, A., Liang, S., Chen, Y., Lin, H., Zhu, X., Huang, S., Tian, J., Tang, R., Wang, Q., & Mo, Z. (2018). Breast cancer in postmenopausal women is associated with an altered gut metagenome. In Microbiome (Vol. 6, Issue 1). https://doi.org/10.1186/s40168-018-0515-3 |
| --- |
