# Supplementary material for: Reproducible and Opposing Microbiome Signatures Distinguish Autoimmune Diseases and Cancers: A Systematic Review and Meta-Analysis
Source: Research Square preprint supplement (doi:10.21203/rs.3.rs-1195626/v1), 2021-12-29
Supplement: Supplementary file 5 [file ead4421d441d9f85f59b8994.xlsx]

## Sheet: Title
Reproducible and opposing microbiome signatures distinguish autoimmune diseases and cancers
Supplementary file 1. List of predicted metabolic pathways that were retrived through MACADAM

## Sheet: Summary
Association	All taxa	Bacteroidetes	Firmicutes	Proteobacteria
Total pathway detected	936	493	673	847
Total pathways detected exclussively across cancer-increased taxa	303	53	164	700
Total pathways found exclussively across autoimmune-increased taxa	17	39	21	0
Cancer-increased taxa used for pathway analysis	Akkermansia, Anaerococcus, Aquabacterium Bacteroides fragilis, Bilophila wadsworthia, Christensenella, Collinsella, Delftia, Desulfovibrio, Dialister pneumosintes, Enterococcus, Escherichia coli, Filifactor, Fusobacterium, Fusobacterium nucleatum, Gemella morbillorum, Klebsiella, Lactobacillus, Lactococcus, Leptotrichia, Megasphaera, Mogibacterium, Morganella, Odoribacter, Oxalobacter, Parabacter…	Bacteroides fragilis, Odoribacter, Parabacteroides, Paraprevotella, Porphyromonas, Porphyromonas asaccharolytica	Anaerococcus, Christensenella, Dialister pneumosintes, Enterococcus, Filifactor, Gemella morbillorum, Lactobacillus, Lactococcus, Megasphaera, Mogibacterium, Parvimonas, Parvimonas micra, Selenomonas, Selenomonas sputigena, Turicibacter	Aquabacterium, Bilophila wadsworthia, Delftia, Desulfovibrio, Escherichia coli, Klebsiella, Morganella, Oxalobacter, Proteus
Autoimmune-increased taxa used for pathway analysis	Acidaminococcus intestini, Atopobium, Bacteroides, Bifidobacterium longum, Bifidobacterium pseudocatenulatum, Blautia, Eggerthella, Eubacterium eligens, Eubacterium hallii, Eubacterium rectale, Flavonifractor, Fusobacterium varium, Gemella, Lachnoclostridium, Olsenella, Streptococcus salivarius, Sutterella	Bacteroides	Acidaminococcus intestini, Blautia, Eubacterium eligens, Eubacterium hallii, Eubacterium rectale, Flavonifractor, Gemella, Lachnoclostridium, Streptococcus salivarius	Sutterella

## Sheet: Cancer-increased_Pathways
No.	Metabolic.Pathway	Present.in.X.org..Total.org.	Median.score	Median.frequency	Target.taxonomies	Strain.with.the.Pathway	Pathway.Hierarchy
1	polyhydroxybutanoate biosynthesis	1/2434	1.0	3.33	Aquabacterium	Aquabacterium olei NBRC 110486	Biosynthesis.Storage-Compounds-Biosynthesis.PWY1-3.
2	4-hydroxyacetophenone degradation	1/2434	0.2	0.4	Aquabacterium	Aquabacterium olei NBRC 110486	Degradation.AROMATIC-COMPOUNDS-DEGRADATION.PWY-7002.
3	cyanate degradation	786/2434	0.67	1	Aquabacterium, Escherichia coli, Klebsiella	Escherichia coli PCN033, Escherichia coli O104:H4 TY-2482, Escherichia coli O104:H4 FDAARGOS_348, Escherichia coli O104:H4 FDAARGOS_349, Escherichia coli O104:H4 FWSEC0009, Escherichia coli O104:H4 LB226692, Escherichia coli O157 180-PT54, Escherichia coli O157 644-PT8, Escherichia coli O157 FDAARGOS_293, Escherichia coli O157 Al Ain, Escherichia coli O157 AR-0430, Escherichia coli O157 AR-0429, …
4	L-cysteine biosynthesis VII (from S-sulfo-L-cysteine)	879/2434	0.5	0.75	Aquabacterium, Escherichia coli, Klebsiella, Morganella	Escherichia coli PCN033, Escherichia coli O104:H4 FDAARGOS_348, Escherichia coli O104:H4 FDAARGOS_349, Escherichia coli O104:H4 FWSEC0009, Escherichia coli O157 180-PT54, Escherichia coli O157 644-PT8, Escherichia coli O157 FDAARGOS_293, Escherichia coli O157 Al Ain, Escherichia coli O157 AR-0430, Escherichia coli O157 AR-0429, Escherichia coli O157 AR-0428, Escherichia coli O157 AR-0427, Escheri…
5	octane oxidation	3/2434	0.4	2.2	Aquabacterium, Klebsiella	Klebsiella oxytoca FDAARGOS_335, Klebsiella pneumoniae CG43, Aquabacterium olei NBRC 110486	Degradation.Other-Degradation.P221-PWY.
6	benzoate degradation I (aerobic)	455/2434	1.0	1	Aquabacterium, Klebsiella	Klebsiella michiganensis KNU07, Klebsiella sp. D5A, Klebsiella quasipneumoniae subsp. similipneumoniae G747, Klebsiella quasipneumoniae subsp. similipneumoniae ATCC 700603, Klebsiella quasipneumoniae CAV1947, Klebsiella quasipneumoniae L22, Klebsiella quasipneumoniae D120-1, Klebsiella quasipneumoniae A708, Klebsiella quasipneumoniae SNI47, Klebsiella quasipneumoniae TH114, Klebsiella quasipneumo…	Degradation.AROMATIC-COMPOUNDS-DEGRADATION.Benzoate-Degradation.PWY-2503.
7	4-aminobutanoate degradation III	1487/2434	0.5	1	Christensenella, Delftia, Proteus, Desulfovibrio, Megasphaera, Lactobacillus, Selenomonas, Lactococcus, Escherichia coli, Aquabacterium, Klebsiella	Christensenella minuta DSM 22607, Megasphaera elsdenii NCIMB702410, Lactobacillus ginsenosidimutans EMML 3041, Lactobacillus heilongjiangensis DSM 28069, Lactobacillus curieae CCTCC M 2011381, Lactobacillus hokkaidonensis JCM 18461, Lactobacillus kunkeei MP2, Lactobacillus parabuchneri FAM21731, Lactobacillus brevis subsp. gravesensis ATCC 27305, Lactobacillus pentosus SLC13, Lactobacillus pentos…
8	vancomycin resistance II	8/2434	0.33	0.33	Christensenella, Enterococcus	Christensenella sp. Marseille-P3954, Enterococcus faecium 16-346, Enterococcus gallinarum FDAARGOS_163, Enterococcus sp. CR-Ec1, Enterococcus sp. FDAARGOS_375, Enterococcus sp. FDAARGOS_553, Enterococcus sp. M190262, Enterococcus casseliflavus EC20	Detoxification.Antibiotic-Resistance.Vancomycin-Resistnace.PWY-6455./Biosynthesis.Cell-Structure-Biosynthesis.Cell-Wall-Biosynthesis.PWY-6455.
9	glycerol-3-phosphate shuttle	2/2434	1.0	1.5	Christensenella, Klebsiella	Christensenella minuta DSM 22607, Klebsiella pneumoniae 342	Energy-Metabolism.OTHER-ENERGY.PWY-6118.
10	fluoroacetate degradation	1/2434	1.0	1	Delftia	Delftia acidovorans SPH-1	Detoxification.PWY-6646.
11	sulfite oxidation IV	1/2434	1.0	1	Delftia	Delftia acidovorans SPH-1	Degradation.Noncarbon-Nutrients.Sulfur-Metabolism.Sulfite-Oxidation.PWY-5326.
12	5,6-dimethylbenzimidazole biosynthesis I (aerobic)	3/2434	1.0	2.33	Delftia	Delftia tsuruhatensis CM13, Delftia sp. HK171, Delftia sp. Cs1-4	Biosynthesis.Cofactor-Biosynthesis.Vitamin-Biosynthesis.Cobalamin-Biosynthesis.Cobamide-De-Novo-Biosynthesis.DMB-Biosynthesis.PWY-5523.
13	superpathway of erythromycin biosynthesis (without sugar biosynthesis)	1/2434	0.12	0.12	Delftia	Delftia acidovorans SPH-1	Super-PWY-6975./Biosynthesis.SECONDARY-METABOLITE-BIOSYNTHESIS.Antibiotic-Biosynthesis.Macrolides-Biosynthesis.PWY-6975.
14	nicotinate degradation I	1/2434	0.33	0.5	Delftia	Delftia tsuruhatensis CM13	Degradation.AROMATIC-COMPOUNDS-DEGRADATION.Nicotinate-Degradation.PWY-722.
15	erythromycin D biosynthesis	1/2434	0.25	0.25	Delftia	Delftia sp. Cs1-4	Biosynthesis.SECONDARY-METABOLITE-BIOSYNTHESIS.Antibiotic-Biosynthesis.Macrolides-Biosynthesis.PWY-7106.
16	3,5-dichlorocatechol degradation	3/2434	0.12	0.25	Delftia	Delftia tsuruhatensis CM13, Delftia sp. HK171, Delftia sp. Cs1-4	Degradation.CHLORINATED-COMPOUNDS-DEG.Chloroaromatic-Compounds-Degradation.Chlorocatechol-Degradation.PWY-6084./Degradation.AROMATIC-COMPOUNDS-DEGRADATION.Chloroaromatic-Compounds-Degradation.Chlorocatechol-Degradation.PWY-6084.
17	L-tyrosine biosynthesis IV	1/2434	1.0	1	Delftia	Delftia acidovorans SPH-1	Biosynthesis.Amino-Acid-Biosynthesis.IND-AMINO-ACID-SYN.TYROSINE-SYN.PWY-6134.
18	&beta;-alanine biosynthesis II	5/2434	0.5	0.5	Delftia, Aquabacterium	Delftia tsuruhatensis CM13, Delftia sp. HK171, Delftia sp. Cs1-4, Delftia acidovorans SPH-1, Aquabacterium olei NBRC 110486	Biosynthesis.Amino-Acid-Biosynthesis.Other-Amino-Acid-Biosynthesis.Beta-Alanine-Biosynthesis.PWY-3941.
19	heme a biosynthesis	4/2434	0.75	0.75	Delftia, Aquabacterium	Delftia tsuruhatensis CM13, Delftia sp. HK171, Delftia sp. Cs1-4, Aquabacterium olei NBRC 110486	Biosynthesis.Cofactor-Biosynthesis.Porphyrin-Compounds-Biosynthesis.HEME-SYN.PWY-7856.
20	&beta;-alanine degradation II	5/2434	0.5	0.5	Delftia, Aquabacterium	Delftia tsuruhatensis CM13, Delftia sp. HK171, Delftia sp. Cs1-4, Delftia acidovorans SPH-1, Aquabacterium olei NBRC 110486	Degradation.Amino-Acid-Degradation.MISCELLANEOUS-DEG.Beta-Alanine-Degradation.PWY-1781.
21	D-arginine degradation	25/2434	0.5	0.5	Delftia, Desulfovibrio, Lactobacillus, Fusobacterium, Escherichia coli, Fusobacterium nucleatum, Klebsiella	Lactobacillus brevis SRCM101174, Lactobacillus brevis SRCM101106, Escherichia coli NA114, Escherichia coli JJ1886, Escherichia coli ETEC H10407, Escherichia coli E22, Escherichia coli SE15, Escherichia coli 'BL21-Gold(DE3)pLysS AG', Klebsiella michiganensis KCTC 1686, Klebsiella michiganensis E718, Klebsiella variicola At-22, Klebsiella pneumoniae KCTC 2242, Klebsiella pneumoniae subsp. pneumonia…	Degradation.Amino-Acid-Degradation.MISCELLANEOUS-DEG.D-Amino-Acid-Degradation.PWY-6422.
22	L-rhamnose degradation II	1162/2434	0.12	0.12	Delftia, Desulfovibrio, Lactobacillus, Fusobacterium, Escherichia coli, Fusobacterium nucleatum, Parabacteroides, Klebsiella	Lactobacillus brevis subsp. gravesensis ATCC 27305, Escherichia coli PCN033, Escherichia coli NA114, Escherichia coli O157 180-PT54, Escherichia coli O157 644-PT8, Escherichia coli O157 FDAARGOS_293, Escherichia coli O157 Al Ain, Escherichia coli O157 AR-0430, Escherichia coli O157 AR-0429, Escherichia coli O157 AR-0428, Escherichia coli O157 AR-0427, Escherichia coli O55:H7 str. RM12579, Escheri…
23	(R,R)-butanediol biosynthesis	69/2434	1.0	1	Delftia, Desulfovibrio, Lactobacillus, Lactococcus, Escherichia coli, Klebsiella	Lactobacillus brevis subsp. gravesensis ATCC 27305, Lactobacillus buchneri CD034, Lactobacillus reuteri I5007, Lactobacillus sakei LZ217, Lactobacillus sakei J64, Lactobacillus sakei MFPB16A1401, Lactobacillus sakei ZFM220, Lactobacillus sakei ZFM229, Lactobacillus fermentum 3872, Lactobacillus fermentum CECT 5716, Lactobacillus sanfranciscensis TMW 1.1304, Lactobacillus acidipiscis KCTC 13900, E…	Energy-Metabolism.Fermentation.Alcohol-Biosynthesis.Butanediol-Biosynthesis.PWY-5951.
24	(R,R)-butanediol degradation	69/2434	1.0	1	Delftia, Desulfovibrio, Lactobacillus, Lactococcus, Escherichia coli, Klebsiella	Lactobacillus brevis subsp. gravesensis ATCC 27305, Lactobacillus buchneri CD034, Lactobacillus reuteri I5007, Lactobacillus sakei LZ217, Lactobacillus sakei J64, Lactobacillus sakei MFPB16A1401, Lactobacillus sakei ZFM220, Lactobacillus sakei ZFM229, Lactobacillus fermentum 3872, Lactobacillus fermentum CECT 5716, Lactobacillus sanfranciscensis TMW 1.1304, Lactobacillus acidipiscis KCTC 13900, E…	Degradation.Alcohol-Degradation.2-3-Butanediol-Degradation.PWY3O-246.
25	ethylene glycol degradation	1402/2434	0.5	0.5	Delftia, Desulfovibrio, Oxalobacter, Escherichia coli, Parabacteroides, Klebsiella	Escherichia coli PCN033, Escherichia coli NA114, Escherichia coli O104:H4 TY-2482, Escherichia coli O104:H4 FDAARGOS_348, Escherichia coli O104:H4 FDAARGOS_349, Escherichia coli O104:H4 FWSEC0009, Escherichia coli O104:H4 LB226692, Escherichia coli O157 180-PT54, Escherichia coli O157 644-PT8, Escherichia coli O157 FDAARGOS_293, Escherichia coli O157 Al Ain, Escherichia coli O157 AR-0430, Escheri…
26	malonate degradation I (biotin-independent)	35/2434	0.33	0.67	Delftia, Enterococcus, Desulfovibrio, Lactobacillus, Lactococcus, Klebsiella	Lactobacillus delbrueckii subsp. bulgaricus ATCC BAA-365, Lactobacillus plantarum 16, Lactobacillus plantarum EGD-AQ4, Lactobacillus paracasei ATCC 334, Lactobacillus sakei DS4, Lactobacillus rhamnosus ATCC 21052, Lactobacillus rhamnosus HN001, Lactobacillus rhamnosus R0011, Lactobacillus rhamnosus MTCC 5462, Klebsiella michiganensis KCTC 1686, Klebsiella michiganensis E718, Klebsiella sp. D5A, K…	Degradation.CARBOXYLATES-DEG.Malonate-Degradation.PWY-5794.
27	protocatechuate degradation III (para-cleavage pathway)	110/2434	0.2	0.2	Delftia, Enterococcus, Desulfovibrio, Megasphaera, Lactobacillus, Lactococcus, Escherichia coli, Klebsiella	Megasphaera hexanoica MH, Lactobacillus acidophilus NCFM, Lactobacillus brevis BSO 464, Lactobacillus brevis NPS-QW-145, Lactobacillus brevis 100D8, Lactobacillus brevis ATCC 367, Lactobacillus casei BL23, Lactobacillus delbrueckii subsp. bulgaricus ATCC BAA-365, Lactobacillus delbrueckii subsp. bulgaricus ATCC 11842 = JCM 1002, Lactobacillus helveticus CNRZ32, Lactobacillus helveticus DPC 4571, …	Degradation.AROMATIC-COMPOUNDS-DEGRADATION.Protocatechuate-Degradation.PWY-6336.
28	L-phenylalanine degradation I (aerobic)	51/2434	0.33	0.33	Delftia, Enterococcus, Desulfovibrio, Megasphaera, Lactobacillus, Lactococcus, Fusobacterium, Escherichia coli, Fusobacterium nucleatum, Aquabacterium, Klebsiella, Akkermansia	Megasphaera hexanoica MH, Lactobacillus plantarum 16, Lactobacillus plantarum B21, Lactobacillus plantarum 5-2, Lactobacillus plantarum WCFS1, Lactobacillus plantarum JDM1, Lactobacillus plantarum subsp. plantarum P-8, Lactobacillus plantarum subsp. plantarum ST-III, Lactobacillus paracasei ATCC 334, Lactobacillus ruminis ATCC 27782, Lactobacillus rhamnosus GG GG (ATCC 53103), Lactobacillus rhamn…	Degradation.Amino-Acid-Degradation.Proteinogenic-Amino-Acids-Degradation.PHENYLALANINE-DEG.PHENYLALANINE-DEG1-PWY.
29	3-chlorocatechol degradation II (ortho)	95/2434	0.2	0.2	Delftia, Enterococcus, Desulfovibrio, Megasphaera, Lactococcus, Escherichia coli, Parabacteroides, Klebsiella	Megasphaera elsdenii 14-14, Escherichia coli NA114, Escherichia coli O104:H4 TY-2482, Escherichia coli O104:H4 LB226692, Escherichia coli UMNF18, Escherichia coli JJ1886, Escherichia coli O157:H7 str. EDL933, Escherichia coli CFT073, Escherichia coli 042, Escherichia coli str. K-12 substr. DH10B, Escherichia coli ETEC H10407, Escherichia coli str. K-12 substr. W3110, Escherichia coli Nissle 1917,…	Degradation.CHLORINATED-COMPOUNDS-DEG.Chloroaromatic-Compounds-Degradation.Chlorocatechol-Degradation.3-Chlorocatechol-Degradation.PWY-6193./Degradation.AROMATIC-COMPOUNDS-DEGRADATION.Chloroaromatic-Compounds-Degradation.Chlorocatechol-Degradation.3-Chlorocatechol-Degradation.PWY-6193.
30	L-rhamnose degradation III	2/2434	0.21	0.21	Delftia, Escherichia coli	Escherichia coli JJ1886, Delftia acidovorans SPH-1	Degradation.Carbohydrates-Degradation.Sugars-And-Polysaccharides-Degradation.L-rhamnose-Degradation.PWY-6714.
31	salicylate degradation IV	9/2434	0.2	0.2	Delftia, Escherichia coli	Escherichia coli O104:H4 TY-2482, Escherichia coli O104:H4 LB226692, Escherichia coli Nissle 1917, Escherichia coli E110019, Escherichia coli F11, Escherichia coli 53638, Escherichia coli IAI39, Escherichia coli LF82, Delftia acidovorans SPH-1	Degradation.AROMATIC-COMPOUNDS-DEGRADATION.Salicylate-Degradation.PWY-6640.
32	3-chlorobenzoate degradation III (via gentisate)	151/2434	0.5	0.5	Delftia, Escherichia coli, Klebsiella	Escherichia coli O157 180-PT54, Escherichia coli O157 644-PT8, Escherichia coli O157 FDAARGOS_293, Escherichia coli O157 Al Ain, Escherichia coli O157 AR-0430, Escherichia coli O157 AR-0429, Escherichia coli O157 AR-0428, Escherichia coli O157 AR-0427, Escherichia coli O55:H7 str. RM12579, Escherichia coli O145 str. RM9872, Escherichia coli O145:H28 str. RM12581, Escherichia coli O145:H28 str. RM…	Degradation.CHLORINATED-COMPOUNDS-DEG.Chloroaromatic-Compounds-Degradation.Chlorobenzoate-Degradation.3-Chlorobenzoate-Degradation.PWY-6228./Degradation.AROMATIC-COMPOUNDS-DEGRADATION.Chloroaromatic-Compounds-Degradation.Chlorobenzoate-Degradation.3-Chlorobenzoate-Degradation.PWY-6228.
33	glucose degradation (oxidative)	279/2434	0.4	0.8	Delftia, Escherichia coli, Klebsiella	Escherichia coli ETEC H10407, Escherichia coli SE15, Klebsiella michiganensis KCTC 1686, Klebsiella michiganensis RC10, Klebsiella michiganensis K516, Klebsiella michiganensis K518, Klebsiella michiganensis AR375, Klebsiella michiganensis E718, Klebsiella sp. D5A, Klebsiella quasipneumoniae subsp. similipneumoniae ATCC 700603, Klebsiella quasipneumoniae CAV1947, Klebsiella quasipneumoniae L22, Kl…	Degradation.SECONDARY-METABOLITE-DEGRADATION.Sugar-Derivatives.SUGAR-ACIDS-DEG.DHGLUCONATE-PYR-CAT-PWY./Degradation.Carbohydrates-Degradation.Sugars-And-Polysaccharides-Degradation.DHGLUCONATE-PYR-CAT-PWY./Degradation.CARBOXYLATES-DEG.SUGAR-ACIDS-DEG.DHGLUCONATE-PYR-CAT-PWY.
34	cinnamate and 3-hydroxycinnamate degradation to 2-hydroxypentadienoate	1268/2434	0.4	0.6	Delftia, Escherichia coli, Klebsiella	Escherichia coli PCN033, Escherichia coli O104:H4 FDAARGOS_348, Escherichia coli O104:H4 FDAARGOS_349, Escherichia coli O104:H4 FWSEC0009, Escherichia coli O157 180-PT54, Escherichia coli O157 644-PT8, Escherichia coli O157 FDAARGOS_293, Escherichia coli O157 Al Ain, Escherichia coli O157 AR-0430, Escherichia coli O157 AR-0429, Escherichia coli O157 AR-0428, Escherichia coli O157 AR-0427, Escheri…
35	TCA cycle II (plants and fungi)	22/2434	1.0	2.28	Delftia, Escherichia coli, Klebsiella	Escherichia coli NA114, Escherichia coli ATCC 25922, Escherichia coli JJ1886, Escherichia coli Nissle 1917, Escherichia coli SE15, Escherichia coli J53, Escherichia coli S88, Escherichia coli IAI39, Escherichia coli ABU 83972, Escherichia coli 'BL21-Gold(DE3)pLysS AG', Escherichia coli TW11681, Klebsiella michiganensis KCTC 1686, Klebsiella michiganensis E718, Klebsiella sp. D5A, Klebsiella pneum…	Energy-Metabolism.TCA-VARIANTS.PWY-5690.
36	L-alanine degradation I	60/2434	1.0	1.5	Delftia, Escherichia coli, Klebsiella	Escherichia coli O104:H4 TY-2482, Escherichia coli O104:H4 LB226692, Escherichia coli UMNF18, Escherichia coli J96, Escherichia coli ATCC 25922, Escherichia coli O157:H7 str. EDL933, Escherichia coli CFT073, Escherichia coli 042, Escherichia coli str. K-12 substr. DH10B, Escherichia coli str. K-12 substr. W3110, Escherichia coli Nissle 1917, Escherichia coli O139:H28 str. E24377A, Escherichia col…	Degradation.Amino-Acid-Degradation.Proteinogenic-Amino-Acids-Degradation.ALANINE-DEG.ALADEG-PWY.
37	chlorosalicylate degradation	78/2434	0.29	0.29	Delftia, Escherichia coli, Klebsiella	Escherichia coli O145:H28 str. RM12761, Escherichia coli O157:H7 str. SS17, Escherichia coli O157:H7 str. SS52, Escherichia coli O157:H7_EC4206, Escherichia coli O157:H7_EC4045, Escherichia coli O157:H7_EC4042, Escherichia coli O157:H7 str. EC4115, Escherichia coli O157:H7_TW14588, Escherichia coli O157:H7 str. TW14359, Escherichia coli EC974, Escherichia coli EC1515, Escherichia coli FORC_044, E…
38	methylsalicylate degradation	78/2434	1.0	1	Delftia, Escherichia coli, Klebsiella	Escherichia coli O145:H28 str. RM12761, Escherichia coli O157:H7 str. SS17, Escherichia coli O157:H7 str. SS52, Escherichia coli O157:H7_EC4206, Escherichia coli O157:H7_EC4045, Escherichia coli O157:H7_EC4042, Escherichia coli O157:H7 str. EC4115, Escherichia coli O157:H7_TW14588, Escherichia coli O157:H7 str. TW14359, Escherichia coli EC974, Escherichia coli EC1515, Escherichia coli FORC_044, E…
39	two-component alkanesulfonate monooxygenase	569/2434	1.0	1.5	Delftia, Escherichia coli, Klebsiella	Escherichia coli NA114, Escherichia coli O104:H4 TY-2482, Escherichia coli O104:H4 FDAARGOS_348, Escherichia coli O104:H4 FDAARGOS_349, Escherichia coli O104:H4 LB226692, Escherichia coli O157 FDAARGOS_293, Escherichia coli UMNF18, Escherichia coli O103 str. RM8385, Escherichia coli O111 str. RM9322, Escherichia coli O121 str. RM8352, Escherichia coli O91 str. RM7190, Escherichia coli O7:K1 str. …
40	urate conversion to allantoin I	26/2434	0.67	0.67	Delftia, Escherichia coli, Klebsiella	Escherichia coli JJ1886, Escherichia coli BL21(DE3), Escherichia coli DH1, Escherichia coli 'BL21-Gold(DE3)pLysS AG', Klebsiella michiganensis KCTC 1686, Klebsiella sp. D5A, Klebsiella variicola At-22, Klebsiella aerogenes FDAARGOS_327, Klebsiella aerogenes FDAARGOS_513, Klebsiella aerogenes FDAARGOS_152, Klebsiella aerogenes G7, Klebsiella aerogenes FDAARGOS_139, Klebsiella aerogenes AR_0009, Kl…	Degradation.AROMATIC-COMPOUNDS-DEGRADATION.Urate-Degradation.PWY-5691.
41	salicylate degradation I	78/2434	1.0	1	Delftia, Escherichia coli, Klebsiella	Escherichia coli O145:H28 str. RM12761, Escherichia coli O157:H7 str. SS17, Escherichia coli O157:H7 str. SS52, Escherichia coli O157:H7_EC4206, Escherichia coli O157:H7_EC4045, Escherichia coli O157:H7_EC4042, Escherichia coli O157:H7 str. EC4115, Escherichia coli O157:H7_TW14588, Escherichia coli O157:H7 str. TW14359, Escherichia coli EC974, Escherichia coli EC1515, Escherichia coli FORC_044, E…
42	pentachlorophenol degradation	11/2434	0.17	0.17	Delftia, Escherichia coli, Klebsiella	Escherichia coli ETEC H10407, Escherichia coli SE15, Escherichia coli DH1, Escherichia coli O25b:H4-ST131 EC958, Klebsiella michiganensis E718, Klebsiella variicola At-22, Klebsiella pneumoniae subsp. pneumoniae HS11286, Klebsiella pneumoniae subsp. pneumoniae 1084, Klebsiella pneumoniae JM45, Delftia sp. Cs1-4, Delftia acidovorans SPH-1	Degradation.CHLORINATED-COMPOUNDS-DEG.PCPDEG-PWY.
43	2-aminophenol degradation	11/2434	0.25	0.25	Delftia, Escherichia coli, Klebsiella	Escherichia coli HS, Escherichia coli E22, Escherichia coli 53638, Escherichia coli SE11, Escherichia coli B str. REL606, Escherichia coli ATCC 8739, Escherichia coli DH1, Escherichia coli IAI1, Klebsiella pneumoniae JH1, Klebsiella pneumoniae 1162281, Delftia acidovorans SPH-1	Degradation.AROMATIC-COMPOUNDS-DEGRADATION.PWY-6210.
44	cyanuric acid degradation II	15/2434	0.33	0.67	Delftia, Escherichia coli, Klebsiella	Escherichia coli NA114, Escherichia coli UMNF18, Escherichia coli str. K-12 substr. DH10B, Escherichia coli ETEC H10407, Escherichia coli BL21(DE3), Escherichia coli J53, Escherichia coli NCTC86, Escherichia coli TW11681, Escherichia coli TW10598, Klebsiella sp. D5A, Klebsiella pneumoniae JH1, Klebsiella pneumoniae 1162281, Klebsiella pneumoniae subsp. pneumoniae DSM 30104, Klebsiella pneumoniae …	Degradation.AROMATIC-COMPOUNDS-DEGRADATION.Cyanurate-Degradation.PWY-5169.
45	ketolysis	17/2434	1.0	2.67	Delftia, Escherichia coli, Klebsiella	Escherichia coli NA114, Escherichia coli O139:H28 str. E24377A, Escherichia coli B7A, Escherichia coli IAI1, Escherichia coli O25b:H4-ST131 EC958, Klebsiella variicola At-22, Klebsiella pneumoniae KCTC 2242, Klebsiella pneumoniae subsp. pneumoniae Kp13, Klebsiella pneumoniae subsp. pneumoniae HS11286, Klebsiella pneumoniae subsp. pneumoniae 1084, Klebsiella pneumoniae CG43, Klebsiella pneumoniae …	Energy-Metabolism.OTHER-ENERGY.PWY66-368.
46	aerobactin biosynthesis	263/2434	0.25	0.25	Delftia, Escherichia coli, Klebsiella	Escherichia coli PCN033, Escherichia coli NA114, Escherichia coli O104:H4 TY-2482, Escherichia coli O104:H4 FDAARGOS_348, Escherichia coli O104:H4 FDAARGOS_349, Escherichia coli O104:H4 FWSEC0009, Escherichia coli O104:H4 LB226692, Escherichia coli O104:H4 str. C227-11, Escherichia coli O26 str. RM8426, Escherichia coli O26 str. RM10386, Escherichia coli O103 str. RM8385, Escherichia coli O145 st…
47	3-oxoadipate degradation	185/2434	1.0	1.5	Delftia, Escherichia coli, Klebsiella, Aquabacterium	Escherichia coli NA114, Escherichia coli ETEC H10407, Escherichia coli SE15, Escherichia coli BL21(DE3), Escherichia coli JME67, Escherichia coli JME65, Escherichia coli JME64, Escherichia coli JME66, Escherichia coli ABU 83972, Escherichia coli 'BL21-Gold(DE3)pLysS AG', Escherichia coli O25b:H4-ST131 EC958, Klebsiella michiganensis KCTC 1686, Klebsiella michiganensis M1, Klebsiella michiganensis…	Degradation.CARBOXYLATES-DEG.PWY-2361.
48	4-sulfocatechol degradation	470/2434	0.25	0.5	Delftia, Escherichia coli, Klebsiella, Aquabacterium	Escherichia coli JME67, Escherichia coli JME65, Escherichia coli JME64, Escherichia coli JME66, Klebsiella michiganensis M1, Klebsiella michiganensis K516, Klebsiella michiganensis K518, Klebsiella michiganensis AR375, Klebsiella michiganensis M82255, Klebsiella michiganensis KNU07, Klebsiella michiganensis FDAARGOS_647, Klebsiella michiganensis C52, Klebsiella michiganensis HKOPL1, Klebsiella qu…	Degradation.AROMATIC-COMPOUNDS-DEGRADATION.Sulfoaromatics-Degradation.PWY-6041.
49	taurine degradation IV	1412/2434	1.0	1	Delftia, Escherichia coli, Klebsiella, Aquabacterium, Morganella	Escherichia coli PCN033, Escherichia coli NA114, Escherichia coli O104:H4 TY-2482, Escherichia coli O104:H4 FDAARGOS_348, Escherichia coli O104:H4 FDAARGOS_349, Escherichia coli O104:H4 FWSEC0009, Escherichia coli O104:H4 LB226692, Escherichia coli O157 180-PT54, Escherichia coli O157 644-PT8, Escherichia coli O157 FDAARGOS_293, Escherichia coli O157 Al Ain, Escherichia coli O157 AR-0430, Escheri…
50	glyoxylate cycle	1371/2434	0.83	1.33	Delftia, Escherichia coli, Klebsiella, Aquabacterium, Proteus	Escherichia coli PCN033, Escherichia coli O104:H4 FDAARGOS_348, Escherichia coli O104:H4 FDAARGOS_349, Escherichia coli O104:H4 FWSEC0009, Escherichia coli O157 180-PT54, Escherichia coli O157 644-PT8, Escherichia coli O157 FDAARGOS_293, Escherichia coli O157 Al Ain, Escherichia coli O157 AR-0430, Escherichia coli O157 AR-0429, Escherichia coli O157 AR-0428, Escherichia coli O157 AR-0427, Escheri…
51	4-hydroxyphenylacetate degradation	206/2434	0.88	0.88	Delftia, Escherichia coli, Klebsiella, Morganella, Proteus	Escherichia coli UMNF18, Escherichia coli O26 str. RM8426, Escherichia coli O111:H-, Escherichia coli HS, Escherichia coli E22, Escherichia coli 53638, Escherichia coli SE11, Escherichia coli B str. REL606, Escherichia coli BL21(DE3), Escherichia coli ATCC 8739, Escherichia coli Ecol_881, Escherichia coli CFSAN029787, Escherichia coli PSUO103, Escherichia coli ECCTRSRTH03, Escherichia coli CFSAN0…	Degradation.AROMATIC-COMPOUNDS-DEGRADATION.3-HYDROXYPHENYLACETATE-DEGRADATION-PWY.
52	vanillin and vanillate degradation II	12/2434	0.5	1	Delftia, Klebsiella	Klebsiella aerogenes FDAARGOS_327, Klebsiella aerogenes FDAARGOS_513, Klebsiella aerogenes NCTC9735, Klebsiella aerogenes FDAARGOS_152, Klebsiella aerogenes G7, Klebsiella aerogenes FDAARGOS_139, Klebsiella aerogenes FDAARGOS_363, Klebsiella aerogenes AR_0018, Klebsiella aerogenes AR_0009, Klebsiella aerogenes AR_0062, Klebsiella aerogenes EA1509E, Delftia sp. Cs1-4	Degradation.AROMATIC-COMPOUNDS-DEGRADATION.Vanillin-Degradation.PWY-7098.
53	methylgallate degradation	12/2434	0.33	0.75	Delftia, Klebsiella	Klebsiella variicola At-22, Klebsiella pneumoniae KCTC 2242, Klebsiella pneumoniae subsp. pneumoniae HS11286, Klebsiella pneumoniae subsp. pneumoniae 1084, Klebsiella pneumoniae CG43, Klebsiella pneumoniae JM45, Klebsiella pneumoniae 30660/NJST258_1, Klebsiella pneumoniae 30684/NJST258_2, Klebsiella pneumoniae subsp. pneumoniae MGH 78578, Klebsiella pneumoniae subsp. pneumoniae NTUH-K2044, Klebsi…	Degradation.AROMATIC-COMPOUNDS-DEGRADATION.METHYLGALLATE-DEGRADATION-PWY.
54	putrescine biosynthesis IV	60/2434	1.0	1.25	Delftia, Klebsiella	Klebsiella michiganensis M1, Klebsiella sp. D5A, Klebsiella variicola DX120E, Klebsiella variicola DSM 15968, Klebsiella variicola GJ1, Klebsiella variicola GJ2, Klebsiella variicola GJ3, Klebsiella aerogenes CAV1320, Klebsiella aerogenes FDAARGOS_152, Klebsiella aerogenes G7, Klebsiella aerogenes FDAARGOS_139, Klebsiella aerogenes AR_0018, Klebsiella aerogenes AR_0007, Klebsiella aerogenes AR_00…	Biosynthesis.Polyamine-Biosynthesis.Putrescine-Biosynthesis.PWY-6305.
55	naphthalene degradation (aerobic)	2/2434	0.42	0.58	Delftia, Klebsiella	Klebsiella pneumoniae CG43, Delftia sp. Cs1-4	Degradation.AROMATIC-COMPOUNDS-DEGRADATION.Naphthalene-Degradation.PWY-5427.
56	&beta;-alanine degradation I	9/2434	1.0	1.5	Delftia, Klebsiella	Klebsiella michiganensis KCTC 1686, Klebsiella michiganensis E718, Klebsiella variicola At-22, Klebsiella pneumoniae KCTC 2242, Klebsiella pneumoniae subsp. pneumoniae 1084, Klebsiella pneumoniae CG43, Klebsiella pneumoniae subsp. pneumoniae MGH 78578, Klebsiella pneumoniae subsp. pneumoniae NTUH-K2044, Delftia acidovorans SPH-1	Degradation.Amino-Acid-Degradation.MISCELLANEOUS-DEG.Beta-Alanine-Degradation.BETA-ALA-DEGRADATION-I-PWY.
57	protocatechuate degradation I (meta-cleavage pathway)	318/2434	0.62	0.88	Delftia, Klebsiella	Klebsiella quasipneumoniae subsp. similipneumoniae ATCC 700603, Klebsiella quasipneumoniae L22, Klebsiella quasipneumoniae D120-1, Klebsiella quasipneumoniae HKUOPLA, Klebsiella quasipneumoniae HKUOPLC, Klebsiella quasipneumoniae ATCC 700603, Klebsiella quasipneumoniae HKUOPA4, Klebsiella quasipneumoniae FDAARGOS_93, Klebsiella quasipneumoniae KPC142, Klebsiella sp. M5al, Klebsiella sp. LY, Klebs…	Degradation.AROMATIC-COMPOUNDS-DEGRADATION.Protocatechuate-Degradation.P184-PWY.
58	3-methylthiopropanoate biosynthesis	11/2434	1.0	1	Delftia, Klebsiella	Klebsiella michiganensis KCTC 1686, Klebsiella sp. D5A, Klebsiella variicola At-22, Klebsiella pneumoniae JH1, Klebsiella pneumoniae 1162281, Klebsiella pneumoniae subsp. pneumoniae DSM 30104, Klebsiella pneumoniae CG43, Klebsiella pneumoniae subsp. pneumoniae MGH 78578, Klebsiella pneumoniae subsp. pneumoniae NTUH-K2044, Klebsiella pneumoniae 342, Delftia acidovorans SPH-1	Biosynthesis.SECONDARY-METABOLITE-BIOSYNTHESIS.S-CONTAINING-SECONDARY-CMPD-SYN.PWY-5389.
59	nitrilotriacetate degradation	14/2434	0.5	0.5	Delftia, Klebsiella	Klebsiella michiganensis E718, Klebsiella variicola At-22, Klebsiella pneumoniae KCTC 2242, Klebsiella pneumoniae subsp. pneumoniae HS11286, Klebsiella pneumoniae subsp. pneumoniae DSM 30104, Klebsiella pneumoniae subsp. pneumoniae 1084, Klebsiella pneumoniae CG43, Klebsiella pneumoniae JM45, Klebsiella pneumoniae 30660/NJST258_1, Klebsiella pneumoniae 30684/NJST258_2, Klebsiella pneumoniae subsp…	Degradation.CARBOXYLATES-DEG.PWY-6021.
60	malonate decarboxylase activation	217/2434	1.0	1.5	Delftia, Klebsiella, Enterococcus	Klebsiella michiganensis KCTC 1686, Klebsiella michiganensis E718, Klebsiella sp. D5A, Klebsiella quasipneumoniae subsp. similipneumoniae G747, Klebsiella quasipneumoniae CAV1947, Klebsiella quasipneumoniae D120-1, Klebsiella quasipneumoniae TH114, Klebsiella quasipneumoniae KP18-31, Klebsiella quasipneumoniae G4584, Klebsiella quasipneumoniae KPC142, Klebsiella quasipneumoniae CAV2018, Klebsiell…	Biosynthesis.Cofactor-Biosynthesis.PWY-5796.
61	limonene degradation II (L-limonene)	2/2434	0.14	0.14	Delftia, Lactobacillus	Lactobacillus plantarum LQ80, Delftia tsuruhatensis CM13	Degradation.SECONDARY-METABOLITE-DEGRADATION.TERPENOID-DEG.Limonene-Degradation.PWY-5924.
62	limonene degradation I (D-limonene)	2/2434	0.14	0.14	Delftia, Lactobacillus	Lactobacillus plantarum LQ80, Delftia tsuruhatensis CM13	Degradation.SECONDARY-METABOLITE-DEGRADATION.TERPENOID-DEG.Limonene-Degradation.PWY-5923.
63	neurosporene biosynthesis	18/2434	0.4	0.4	Delftia, Lactobacillus, Akkermansia, Enterococcus	Lactobacillus plantarum subsp. plantarum NC8, Lactobacillus plantarum 16, Lactobacillus plantarum IPLA88, Lactobacillus plantarum WJL, Lactobacillus plantarum 4_3, Lactobacillus plantarum 2165, Lactobacillus plantarum B21, Lactobacillus plantarum 5-2, Lactobacillus plantarum WCFS1, Lactobacillus plantarum subsp. plantarum ATCC 14917, Lactobacillus plantarum JDM1, Lactobacillus plantarum subsp. pl…	Biosynthesis.SECONDARY-METABOLITE-BIOSYNTHESIS.Terpenoid-Biosynthesis.TETRATERPENOID-SYN.C40-Carotenoids-Biosynthesis.PWY-6287./Biosynthesis.SECONDARY-METABOLITE-BIOSYNTHESIS.Terpenoid-Biosynthesis.CAROTENOID-SYN.C40-Carotenoids-Biosynthesis.PWY-6287.
64	L-leucine degradation I	8/2434	0.5	0.67	Delftia, Lactobacillus, Escherichia coli, Aquabacterium	Lactobacillus paracasei ATCC 334, Lactobacillus rhamnosus GG GG (ATCC 53103), Lactobacillus rhamnosus Lc 705, Escherichia coli ATCC 25922, Delftia tsuruhatensis CM13, Delftia sp. HK171, Delftia sp. Cs1-4, Aquabacterium olei NBRC 110486	Degradation.Amino-Acid-Degradation.Proteinogenic-Amino-Acids-Degradation.LEUCINE-DEG.LEU-DEG2-PWY.
65	diphenyl ethers degradation	14/2434	0.25	0.25	Delftia, Lactobacillus, Klebsiella	Lactobacillus paracasei N1115, Lactobacillus paracasei KL1, Klebsiella aerogenes AR_0161, Klebsiella aerogenes FDAARGOS_327, Klebsiella aerogenes FDAARGOS_513, Klebsiella aerogenes NCTC9735, Klebsiella aerogenes FDAARGOS_152, Klebsiella aerogenes G7, Klebsiella aerogenes FDAARGOS_139, Klebsiella aerogenes AR_0007, Klebsiella aerogenes AR_0009, Klebsiella aerogenes AR_0062, Klebsiella aerogenes EA…	Degradation.AROMATIC-COMPOUNDS-DEGRADATION.PWY-7747.
66	carbazole degradation	12/2434	0.25	0.25	Delftia, Lactobacillus, Klebsiella, Enterococcus	Lactobacillus paracasei N1115, Lactobacillus paracasei KL1, Lactobacillus murinus ASF361, Klebsiella pneumoniae 30660/NJST258_1, Klebsiella pneumoniae 30684/NJST258_2, Enterococcus gilvus ATCC BAA-350, Enterococcus avium ATCC 14025, Enterococcus durans ATCC 6056 ASWM, Enterococcus durans IPLA 655, Enterococcus mundtii CRL35, Enterococcus malodoratus ATCC 43197, Delftia sp. Cs1-4	Degradation.AROMATIC-COMPOUNDS-DEGRADATION.PWY-6550.
67	1,2-dichloroethane degradation	11/2434	0.25	0.25	Delftia, Lactobacillus, Lactococcus	Lactobacillus acidophilus La-14, Lactobacillus acidophilus FSI4, Lactobacillus acidophilus ATCC 53544, Lactobacillus acidophilus LA1, Lactobacillus acidophilus DSM 20079, Lactobacillus acidophilus YT1, Lactobacillus brevis TMW 1.2113, Lactococcus lactis subsp. lactis YF11, Lactococcus lactis subsp. lactis Dephy 1, Lactococcus garvieae DCC43, Delftia acidovorans SPH-1	Degradation.CHLORINATED-COMPOUNDS-DEG.12DICHLORETHDEG-PWY.
68	L-arginine degradation II (AST pathway)	1446/2434	0.8	1	Delftia, Morganella, Desulfovibrio, Escherichia coli, Aquabacterium, Klebsiella	Escherichia coli PCN033, Escherichia coli NA114, Escherichia coli O104:H4 TY-2482, Escherichia coli O104:H4 FDAARGOS_348, Escherichia coli O104:H4 FDAARGOS_349, Escherichia coli O104:H4 FWSEC0009, Escherichia coli O104:H4 LB226692, Escherichia coli O157 180-PT54, Escherichia coli O157 644-PT8, Escherichia coli O157 FDAARGOS_293, Escherichia coli O157 Al Ain, Escherichia coli O157 AR-0430, Escheri…
69	formaldehyde oxidation II (glutathione-dependent)	1506/2434	0.67	1.33	Delftia, Morganella, Enterococcus, Proteus, Desulfovibrio, Lactobacillus, Escherichia coli, Aquabacterium, Klebsiella	Lactobacillus plantarum 16, Lactobacillus plantarum KP, Lactobacillus plantarum DF, Lactobacillus plantarum RI-113, Lactobacillus plantarum LP2, Lactobacillus plantarum TMW 1.1623, Lactobacillus plantarum dm, Lactobacillus plantarum BDGP2, Lactobacillus plantarum PC520, Lactobacillus plantarum KC28, Lactobacillus plantarum SK151, Lactobacillus plantarum IDCC3501, Lactobacillus plantarum ZFM55, La…
70	oleate biosynthesis IV (anaerobic)	675/2434	0.71	1.5	Delftia, Morganella, Enterococcus, Proteus, Escherichia coli, Klebsiella	Escherichia coli PCN033, Escherichia coli O104:H4 FWSEC0009, Escherichia coli O157 180-PT54, Escherichia coli O157 644-PT8, Escherichia coli O157 Al Ain, Escherichia coli O157 AR-0430, Escherichia coli O157 AR-0429, Escherichia coli O157 AR-0428, Escherichia coli O157 AR-0427, Escherichia coli O104:H4 str. C227-11, Escherichia coli O55:H7 str. RM12579, Escherichia coli O26 str. RM8426, Escherichi…
71	protein S-nitrosylation and denitrosylation	1411/2434	0.2	0.2	Delftia, Morganella, Enterococcus, Proteus, Lactobacillus, Escherichia coli, Aquabacterium, Klebsiella	Lactobacillus plantarum KP, Lactobacillus plantarum DF, Lactobacillus plantarum RI-113, Lactobacillus plantarum LP2, Lactobacillus plantarum TMW 1.1623, Lactobacillus plantarum dm, Lactobacillus plantarum BDGP2, Lactobacillus plantarum PC520, Lactobacillus plantarum KC28, Lactobacillus plantarum SK151, Lactobacillus plantarum IDCC3501, Lactobacillus plantarum ZFM55, Lactobacillus plantarum ZFM9, …
72	tetrathionate reduction I (to thiosulfate)	83/2434	1.0	3	Delftia, Morganella, Proteus, Desulfovibrio, Escherichia coli, Klebsiella	Escherichia coli H15, Escherichia coli KL53, Escherichia coli MS8345, Escherichia coli SCEC020023, Escherichia coli 14EC020, Escherichia coli RS571, Escherichia coli EC-129, Escherichia coli NCTC11129, Klebsiella michiganensis KCTC 1686, Klebsiella michiganensis M1, Klebsiella michiganensis K516, Klebsiella michiganensis K518, Klebsiella michiganensis AR375, Klebsiella michiganensis M82255, Klebs…	Degradation.Noncarbon-Nutrients.Sulfur-Metabolism.Tetrathionate-Reduction.PWY-5358./Energy-Metabolism.Electron-Transfer.PWY-5358.
73	nitrate reduction III (dissimilatory)	555/2434	1.0	4	Delftia, Morganella, Proteus, Desulfovibrio, Escherichia coli, Klebsiella	Escherichia coli PCN033, Escherichia coli NA114, Escherichia coli O104:H4 TY-2482, Escherichia coli O104:H4 LB226692, Escherichia coli O157 Al Ain, Escherichia coli O157 AR-0430, Escherichia coli O157 AR-0429, Escherichia coli O157 AR-0428, Escherichia coli O157 AR-0427, Escherichia coli UMNF18, Escherichia coli O26 str. RM8426, Escherichia coli O145 str. RM9872, Escherichia coli O7:K1 str. CE10,…
74	partial TCA cycle (obligate autotrophs)	486/2434	0.91	1.91	Delftia, Morganella, Proteus, Desulfovibrio, Oxalobacter, Escherichia coli, Bilophila wadsworthia, Klebsiella	Escherichia coli NA114, Escherichia coli O104:H4 TY-2482, Escherichia coli O104:H4 LB226692, Escherichia coli O157 Al Ain, Escherichia coli O157 AR-0430, Escherichia coli O157 AR-0429, Escherichia coli O157 AR-0428, Escherichia coli O157 AR-0427, Escherichia coli UMNF18, Escherichia coli O26 str. RM8426, Escherichia coli str. K-12 substr. MDS42, Escherichia coli str. K-12 substr. MDS42 MDS42 subs…
75	nitrate reduction V (assimilatory)	395/2434	0.75	2.5	Delftia, Morganella, Proteus, Lactobacillus, Selenomonas, Lactococcus, Escherichia coli, Klebsiella, Selenomonas sputigena	Lactobacillus pentosus ZFM222, Lactobacillus pentosus ZFM94, Lactobacillus plantarum FBL-3a, Lactobacillus plantarum SRCM103295, Lactobacillus plantarum IRG1, Lactobacillus plantarum UNQLp11, Lactobacillus plantarum subsp. plantarum TS12, Lactobacillus plantarum subsp. plantarum BNH17, Lactobacillus reuteri, Lactobacillus reuteri Byun-re-01, Lactobacillus reuteri SKKU-OGDONS-01, Lactobacillus reu…
76	nitrate reduction VIIIb (dissimilatory)	509/2434	0.5	1.5	Delftia, Morganella, Proteus, Lactobacillus, Selenomonas, Lactococcus, Escherichia coli, Klebsiella, Selenomonas sputigena	Lactobacillus pentosus ZFM222, Lactobacillus pentosus ZFM94, Lactobacillus plantarum FBL-3a, Lactobacillus plantarum SRCM103295, Lactobacillus plantarum IRG1, Lactobacillus plantarum UNQLp11, Lactobacillus plantarum subsp. plantarum TS12, Lactobacillus plantarum subsp. plantarum BNH17, Lactobacillus reuteri, Lactobacillus reuteri Byun-re-01, Lactobacillus reuteri SKKU-OGDONS-01, Lactobacillus reu…
77	nitrate reduction X (dissimilatory, periplasmic)	1024/2434	0.67	1.33	Delftia, Morganella, Proteus, Selenomonas, Escherichia coli, Aquabacterium, Klebsiella, Selenomonas sputigena	Escherichia coli PCN033, Escherichia coli O104:H4 FDAARGOS_348, Escherichia coli O104:H4 FDAARGOS_349, Escherichia coli O104:H4 FWSEC0009, Escherichia coli O157 180-PT54, Escherichia coli O157 644-PT8, Escherichia coli O157 FDAARGOS_293, Escherichia coli O157 Al Ain, Escherichia coli O157 AR-0430, Escherichia coli O157 AR-0429, Escherichia coli O157 AR-0428, Escherichia coli O157 AR-0427, Escheri…
78	epoxysqualene biosynthesis	7/2434	0.5	1	Delftia, Oxalobacter	Oxalobacter formigenes OXCC13, Oxalobacter formigenes SSYG-15, Oxalobacter formigenes HC-1, Delftia tsuruhatensis CM13, Delftia sp. HK171, Delftia sp. Cs1-4, Delftia acidovorans SPH-1	Biosynthesis.SECONDARY-METABOLITE-BIOSYNTHESIS.Terpenoid-Biosynthesis.TRITERPENOID-SYN.PWY-5670./Biosynthesis.Lipid-Biosynthesis.PWY-5670.
79	D-threitol degradation	32/2434	0.33	0.33	Delftia, Proteus	Proteus hauseri 15H5D-4a, Proteus mirabilis BB2000, Proteus mirabilis HI4320, Proteus mirabilis AR_0155, Proteus mirabilis AR_0156, Proteus mirabilis T21, Proteus mirabilis T18, Proteus mirabilis BC11-24, Proteus mirabilis, Proteus mirabilis AR379, Proteus mirabilis AR_0029, Proteus mirabilis PmBC1123, Proteus mirabilis PmSC1111, Proteus mirabilis FDAARGOS_81, Proteus mirabilis VAC, Proteus mirab…	Degradation.SECONDARY-METABOLITE-DEGRADATION.Sugar-Derivatives.SUGAR-ALCOHOLS-DEG.PWY-7786.
80	Rubisco shunt	1/2434	1.0	2	Desulfovibrio	Desulfovibrio putealis DSM 16056	Energy-Metabolism.PWY-5723.
81	demethylmenaquinol-8 biosynthesis II	16/2434	0.2	0.2	Desulfovibrio	Desulfovibrio dechloracetivorans BerOc1, Desulfovibrio sp. Dsv1, Desulfovibrio magneticus str. Maddingley MBC34 , Desulfovibrio cf. magneticus IFRC170, Desulfovibrio brasiliensis JCM 12178, Desulfovibrio sp. FW1012B, Desulfovibrio sp. 3_1_syn3, Desulfovibrio sp. U5L, Desulfovibrio oxyclinae DSM 11498, Desulfovibrio aminophilus DSM 12254, Desulfovibrio desulfuricans ND132, Desulfovibrio fructosovo…	Biosynthesis.Cofactor-Biosynthesis.Quinone-Biosynthesis.Demethylmenaquinone-Biosynthesis.Demethylmenaquinol-8-Biosynthesis.PWY-6262.
82	alginate biosynthesis I (algal)	1/2434	0.75	0.75	Desulfovibrio	Desulfovibrio brasiliensis JCM 12178	Glycan-Glycan-Biosynthesis.Polysaccharides-Biosynthesis.Alginate-Biosynthesis.PWY-6073./Biosynthesis.Carbohydrates-Biosynthesis.Glycan-Biosynthesis.Polysaccharides-Biosynthesis.Alginate-Biosynthesis.PWY-6073./Biosynthesis.Carbohydrates-Biosynthesis.Polysaccharides-Biosynthesis.Alginate-Biosynthesis.PWY-6073.
83	betaxanthin biosynthesis (via dopamine)	5/2434	0.5	0.5	Desulfovibrio	Desulfovibrio alaskensis G20, Desulfovibrio vulgaris DP4, Desulfovibrio vulgaris RCH1, Desulfovibrio vulgaris Hildenborough, Desulfovibrio vulgaris str. 'Miyazaki F'	Biosynthesis.SECONDARY-METABOLITE-BIOSYNTHESIS.N-CONTAINING-SECONDARY-CMPD-SYN.ALKALOIDS-SYN.BETALAIN-ALKALOIDS.PWY-5403.
84	dimethylsulfoniopropanoate degradation I (cleavage)	2/2434	1.0	1	Desulfovibrio	Desulfovibrio brasiliensis JCM 12178, Desulfovibrio oxyclinae DSM 11498	Degradation.Noncarbon-Nutrients.Sulfur-Metabolism.Dimethylsulfoniopropionate-Degradation.PWY-6046.
85	camptothecin biosynthesis	5/2434	0.2	0.2	Desulfovibrio	Desulfovibrio alaskensis G20, Desulfovibrio vulgaris DP4, Desulfovibrio vulgaris RCH1, Desulfovibrio vulgaris Hildenborough, Desulfovibrio vulgaris str. 'Miyazaki F'	Biosynthesis.SECONDARY-METABOLITE-BIOSYNTHESIS.N-CONTAINING-SECONDARY-CMPD-SYN.ALKALOIDS-SYN.QUINOLINE-ALKALOIDS.PWY-6326.
86	diacylglyceryl-N,N,N-trimethylhomoserine biosynthesis	5/2434	0.5	0.5	Desulfovibrio	Desulfovibrio inopinatus DSM 10711, Desulfovibrio magneticus str. Maddingley MBC34 , Desulfovibrio putealis DSM 16056, Desulfovibrio sp. FW1012B, Desulfovibrio sp. U5L	Biosynthesis.SECONDARY-METABOLITE-BIOSYNTHESIS.PWY-6795./Biosynthesis.Lipid-Biosynthesis.PWY-6795.
87	L-tryptophan degradation VI (via tryptamine)	1/2434	0.33	0.33	Desulfovibrio	Desulfovibrio alaskensis G20	Degradation.Amino-Acid-Degradation.Proteinogenic-Amino-Acids-Degradation.TRYPTOPHAN-DEG.PWY-3181./Biosynthesis.SECONDARY-METABOLITE-BIOSYNTHESIS.N-CONTAINING-SECONDARY-CMPD-SYN.ALKALOIDS-SYN.PWY-3181./Biosynthesis.SECONDARY-METABOLITE-BIOSYNTHESIS.N-CONTAINING-SECONDARY-CMPD-SYN.PWY-3181.
88	3-sulfopropanediol degradation	1/2434	0.33	0.33	Desulfovibrio	Desulfovibrio sp. 3_1_syn3	Degradation.Noncarbon-Nutrients.Sulfur-Metabolism.PWY-6634.
89	L-lysine degradation X	2/2434	0.25	0.25	Desulfovibrio	Desulfovibrio dechloracetivorans BerOc1, Desulfovibrio sp. A2	Degradation.Amino-Acid-Degradation.Proteinogenic-Amino-Acids-Degradation.LYSINE-DEG.PWY-6328.
90	L-carnitine degradation II	1/2434	0.25	0.25	Desulfovibrio	Desulfovibrio oxyclinae DSM 11498	Degradation.AMINE-DEG.CARN-DEG.PWY-3602.
91	coenzyme M biosynthesis I	13/2434	0.14	0.14	Desulfovibrio	Desulfovibrio inopinatus DSM 10711, Desulfovibrio dechloracetivorans BerOc1, Desulfovibrio magneticus str. Maddingley MBC34 , Desulfovibrio cf. magneticus IFRC170, Desulfovibrio magneticus RS-1, Desulfovibrio brasiliensis JCM 12178, Desulfovibrio sp. FW1012B, Desulfovibrio sp. U5L, Desulfovibrio oxyclinae DSM 11498, Desulfovibrio aminophilus DSM 12254, Desulfovibrio desulfuricans ND132, Desulfovi…	Biosynthesis.Cofactor-Biosynthesis.Coenzyme-M-Biosynthesis.P261-PWY.
92	cyclohexane-1-carboxylate degradation (anaerobic)	518/2434	0.5	0.5	Desulfovibrio, Aquabacterium, Escherichia coli, Klebsiella	Escherichia coli O104:H4 FDAARGOS_348, Escherichia coli O104:H4 FDAARGOS_349, Escherichia coli O157 FDAARGOS_293, Escherichia coli O26 str. RM10386, Escherichia coli O103 str. RM8385, Escherichia coli O111 str. RM9322, Escherichia coli O121 str. RM8352, Escherichia coli O145 str. RM9872, Escherichia coli O91 str. RM7190, Escherichia coli O7:K1 str. CE10, Escherichia coli NCCP15648, Escherichia co…
93	formaldehyde oxidation VI (H4MPT pathway)	3/2434	0.5	0.5	Desulfovibrio, Aquabacterium, Klebsiella	Klebsiella michiganensis RC10, Desulfovibrio dechloracetivorans BerOc1, Aquabacterium olei NBRC 110486	Degradation.C1-COMPOUNDS.Formaldehyde-Oxidation.PWY-1723.
94	Calvin-Benson-Bassham cycle	5/2434	0.69	0.77	Desulfovibrio, Aquabacterium, Selenomonas, Porphyromonas, Selenomonas sputigena	Selenomonas sputigena ATCC 35185, Porphyromonas gingivalis A7436, Selenomonas sputigena ATCC 35185, Desulfovibrio hydrothermalis AM13 = DSM 14728, Desulfovibrio putealis DSM 16056, Aquabacterium olei NBRC 110486	Degradation.C1-COMPOUNDS.CO2-Fixation.Autotrophic-CO2-Fixation.CALVIN-PWY./Energy-Metabolism.Photosynthesis.CALVIN-PWY./Biosynthesis.Carbohydrates-Biosynthesis.CARBO-BIOSYNTHESIS.CALVIN-PWY.
95	thiosulfate disproportionation II (cytochrome)	38/2434	1.0	1	Desulfovibrio, Bilophila wadsworthia, Escherichia coli	Escherichia coli O121 str. RM8352, Escherichia coli O114:H49, Escherichia coli SE11, Escherichia coli C11, Escherichia coli C5, Escherichia coli H14, Escherichia coli S21, Escherichia coli H15, Escherichia coli 13E0725, Escherichia coli 13E0780, Escherichia coli ETEC-2264, Escherichia coli 1943, Escherichia coli ATCC 43896, Escherichia coli AR_0019, Escherichia coli 2013C-4830, Escherichia coli 2…	Degradation.Noncarbon-Nutrients.Sulfur-Metabolism.Thiosulfate-Disproportionation.PWY-5352./Energy-Metabolism.PWY-5352.
96	thiosulfate disproportionation I (thiol-dependent)	7/2434	1.0	1	Desulfovibrio, Bilophila wadsworthia, Escherichia coli	Escherichia coli SE11, Bilophila wadsworthia 3_1_6, Desulfovibrio magneticus RS-1, Desulfovibrio sp. FW1012B, Desulfovibrio alaskensis G20, Desulfovibrio aminophilus DSM 12254, Desulfovibrio vulgaris Hildenborough	Degradation.Noncarbon-Nutrients.Sulfur-Metabolism.Thiosulfate-Disproportionation.PWY-5277./Energy-Metabolism.PWY-5277.
97	PRPP biosynthesis II	72/2434	0.67	1	Desulfovibrio, Bilophila wadsworthia, Escherichia coli, Klebsiella	Escherichia coli NA114, Escherichia coli O104:H4 TY-2482, Escherichia coli O104:H4 LB226692, Escherichia coli UMNF18, Escherichia coli J96, Escherichia coli ATCC 25922, Escherichia coli JJ1886, Escherichia coli O157:H7 str. EDL933, Escherichia coli CFT073, Escherichia coli 042, Escherichia coli str. K-12 substr. DH10B, Escherichia coli ETEC H10407, Escherichia coli str. K-12 substr. W3110, Escher…	Biosynthesis.Other-biosynthesis.PRPP-Biosynthesis.PWY0-661.
98	ribitol degradation	22/2434	0.67	1	Desulfovibrio, Bilophila wadsworthia, Escherichia coli, Klebsiella	Escherichia coli O6:H16 2014EL-1346-6, Escherichia coli ETEC H10407, Escherichia coli O127:H6 str. E2348/69, Escherichia coli TW10598, Klebsiella michiganensis KCTC 1686, Klebsiella michiganensis E718, Klebsiella aerogenes KCTC 2190, Klebsiella pneumoniae JH1, Klebsiella pneumoniae 1162281, Klebsiella pneumoniae KCTC 2242, Klebsiella pneumoniae subsp. pneumoniae Kp13, Klebsiella pneumoniae subsp.…	Degradation.SECONDARY-METABOLITE-DEGRADATION.Sugar-Derivatives.SUGAR-ALCOHOLS-DEG.RIBITOLUTIL-PWY.
99	methylphosphonate degradation I	1407/2434	0.75	1.5	Desulfovibrio, Bilophila wadsworthia, Escherichia coli, Klebsiella	Escherichia coli PCN033, Escherichia coli NA114, Escherichia coli O104:H4 TY-2482, Escherichia coli O104:H4 FDAARGOS_348, Escherichia coli O104:H4 FDAARGOS_349, Escherichia coli O104:H4 FWSEC0009, Escherichia coli O104:H4 LB226692, Escherichia coli O157 180-PT54, Escherichia coli O157 644-PT8, Escherichia coli O157 FDAARGOS_293, Escherichia coli O157 Al Ain, Escherichia coli O157 AR-0430, Escheri…
100	vitamin B6 degradation	46/2434	0.11	0.11	Desulfovibrio, Bilophila wadsworthia, Escherichia coli, Klebsiella, Delftia	Escherichia coli JJ1886, Escherichia coli O157:H7 str. EDL933, Escherichia coli CFT073, Escherichia coli 042, Escherichia coli ETEC H10407, Escherichia coli Nissle 1917, Escherichia coli O157:H7 str. Sakai, Escherichia coli SE15, Escherichia coli O157:H7_EC4206, Escherichia coli O157:H7_EC4045, Escherichia coli O157:H7_EC4042, Escherichia coli O157:H7 str. EC4115, Escherichia coli O157:H7_TW14588…	Degradation.COFACTOR-DEGRADATION.PWY-5499.
101	enterobacterial common antigen biosynthesis	95/2434	1.0	1	Desulfovibrio, Bilophila wadsworthia, Escherichia coli, Klebsiella, Delftia	Escherichia coli NA114, Escherichia coli O104:H4 TY-2482, Escherichia coli O104:H4 LB226692, Escherichia coli UMNF18, Escherichia coli J96, Escherichia coli ATCC 25922, Escherichia coli JJ1886, Escherichia coli O157:H7 str. EDL933, Escherichia coli CFT073, Escherichia coli 042, Escherichia coli str. K-12 substr. DH10B, Escherichia coli ETEC H10407, Escherichia coli str. K-12 substr. W3110, Escher…	Super-ECASYN-PWY./Biosynthesis.Cell-Structure-Biosynthesis.Lipopolysaccharide-Biosynthesis.ECASYN-PWY.
102	taurine degradation I	7/2434	1.0	1	Desulfovibrio, Bilophila wadsworthia, Klebsiella	Klebsiella pneumoniae JH1, Bilophila wadsworthia 3_1_6, Desulfovibrio sp. Dsv1, Desulfovibrio sp. A2, Desulfovibrio sp. 3_1_syn3, Desulfovibrio desulfuricans ATCC 27774, Desulfovibrio vulgaris str. 'Miyazaki F'	Degradation.Noncarbon-Nutrients.Sulfur-Metabolism.Taurine-degradation.PWY-1263./Degradation.Noncarbon-Nutrients.NITROGEN-DEG.Taurine-degradation.PWY-1263.
103	L-arginine degradation IX (arginine:pyruvate transaminase pathway)	6/2434	0.25	0.25	Desulfovibrio, Bilophila wadsworthia, Klebsiella	Klebsiella sp. D5A, Klebsiella pneumoniae JH1, Klebsiella pneumoniae 1162281, Klebsiella pneumoniae subsp. pneumoniae DSM 30104, Bilophila wadsworthia 3_1_6, Desulfovibrio dechloracetivorans BerOc1	Degradation.Amino-Acid-Degradation.Proteinogenic-Amino-Acids-Degradation.ARGININE-DEG.PWY-5742.
104	GABA shunt	54/2434	1.0	1.67	Desulfovibrio, Christensenella, Lactobacillus, Escherichia coli	Christensenella minuta DSM 22607, Lactobacillus plantarum 4_3, Escherichia coli NA114, Escherichia coli O104:H4 TY-2482, Escherichia coli O104:H4 LB226692, Escherichia coli UMNF18, Escherichia coli J96, Escherichia coli O157:H7 str. EDL933, Escherichia coli CFT073, Escherichia coli 042, Escherichia coli str. K-12 substr. DH10B, Escherichia coli ETEC H10407, Escherichia coli str. K-12 substr. W311…	Degradation.Amino-Acid-Degradation.Proteinogenic-Amino-Acids-Degradation.GLUTAMATE-DEG.GLUDEG-I-PWY./Degradation.AMINE-DEG.4-Aminobutyraye-Degradation.GLUDEG-I-PWY./Super-GLUDEG-I-PWY.
105	benzoate degradation II (aerobic and anaerobic)	8/2434	1.0	1	Desulfovibrio, Delftia	Delftia sp. HK171, Delftia sp. Cs1-4, Delftia acidovorans SPH-1, Desulfovibrio magneticus str. Maddingley MBC34 , Desulfovibrio cf. magneticus IFRC170, Desulfovibrio magneticus RS-1, Desulfovibrio aminophilus DSM 12254, Desulfovibrio sp. X2	Degradation.AROMATIC-COMPOUNDS-DEGRADATION.Benzoate-Degradation.PWY-283.
106	sulfoacetaldehyde degradation I	11/2434	1.0	1	Desulfovibrio, Delftia	Delftia tsuruhatensis CM13, Delftia sp. HK171, Delftia sp. Cs1-4, Delftia acidovorans SPH-1, Desulfovibrio sp. Dsv1, Desulfovibrio sp. A2, Desulfovibrio fairfieldensis CCUG 45958, Desulfovibrio sp. 3_1_syn3, Desulfovibrio sp. G11, Desulfovibrio desulfuricans ATCC 27774, Desulfovibrio vulgaris str. 'Miyazaki F'	Degradation.Noncarbon-Nutrients.Sulfur-Metabolism.Sulfoacetaldehyde-Degradation.PWY-1281.
107	nitrate reduction VIII (dissimilatory)	82/2434	1.0	9.5	Desulfovibrio, Delftia, Escherichia coli, Klebsiella	Escherichia coli NA114, Escherichia coli O104:H4 TY-2482, Escherichia coli O104:H4 LB226692, Escherichia coli UMNF18, Escherichia coli J96, Escherichia coli ATCC 25922, Escherichia coli JJ1886, Escherichia coli O157:H7 str. EDL933, Escherichia coli CFT073, Escherichia coli 042, Escherichia coli str. K-12 substr. DH10B, Escherichia coli str. K-12 substr. W3110, Escherichia coli Nissle 1917, Escher…	Degradation.Noncarbon-Nutrients.NITROGEN-DEG.Nitrate-Reduction.PWY0-1352./Energy-Metabolism.Respiration.ANAEROBIC-RESPIRATION.PWY0-1352./Energy-Metabolism.Electron-Transfer.PWY0-1352.
108	TCA cycle V (2-oxoglutarate:ferredoxin oxidoreductase)	47/2434	0.75	1.33	Desulfovibrio, Delftia, Escherichia coli, Klebsiella	Escherichia coli NA114, Escherichia coli JJ1886, Escherichia coli ETEC H10407, Escherichia coli O139:H28 str. E24377A, Escherichia coli B7A, Escherichia coli SE15, Escherichia coli BL21(DE3), Escherichia coli DH1, Escherichia coli IAI1, Escherichia coli ABU 83972, Escherichia coli 'BL21-Gold(DE3)pLysS AG', Escherichia coli O25b:H4-ST131 EC958, Klebsiella michiganensis KCTC 1686, Klebsiella michig…	Energy-Metabolism.TCA-VARIANTS.PWY-6969.
109	TCA cycle IV (2-oxoglutarate decarboxylase)	130/2434	0.91	1.36	Desulfovibrio, Delftia, Escherichia coli, Klebsiella	Escherichia coli NA114, Escherichia coli O104:H4 TY-2482, Escherichia coli O104:H4 LB226692, Escherichia coli O55:H7 str. RM12579, Escherichia coli UMNF18, Escherichia coli O26 str. RM10386, Escherichia coli O103 str. RM8385, Escherichia coli O111 str. RM9322, Escherichia coli J96, Escherichia coli ATCC 25922, Escherichia coli JJ1886, Escherichia coli O157:H7 str. EDL933, Escherichia coli CFT073,…	Energy-Metabolism.TCA-VARIANTS.P105-PWY.
110	orthanilate degradation	55/2434	0.2	0.2	Desulfovibrio, Delftia, Escherichia coli, Klebsiella	Escherichia coli O104:H4 TY-2482, Escherichia coli O104:H4 LB226692, Escherichia coli UMNF18, Escherichia coli O157:H7 str. EDL933, Escherichia coli str. K-12 substr. W3110, Escherichia coli O139:H28 str. E24377A, Escherichia coli HS, Escherichia coli B7A, Escherichia coli E22, Escherichia coli E110019, Escherichia coli B171, Escherichia coli 53638, Escherichia coli 101-1, Escherichia coli O157:H…	Degradation.AROMATIC-COMPOUNDS-DEGRADATION.2ASDEG-PWY.
111	L-tyrosine degradation I	273/2434	0.4	0.6	Desulfovibrio, Delftia, Escherichia coli, Klebsiella	Escherichia coli NA114, Escherichia coli O157 180-PT54, Escherichia coli O157 644-PT8, Escherichia coli O157 FDAARGOS_293, Escherichia coli O157 Al Ain, Escherichia coli O157 AR-0430, Escherichia coli O157 AR-0429, Escherichia coli O157 AR-0428, Escherichia coli O157 AR-0427, Escherichia coli O55:H7 str. RM12579, Escherichia coli O145 str. RM9872, Escherichia coli O145:H28 str. RM12581, Escherich…
112	catechol degradation to &beta;-ketoadipate	470/2434	1.0	1	Desulfovibrio, Delftia, Escherichia coli, Klebsiella, Aquabacterium	Escherichia coli JJ1886, Escherichia coli ETEC H10407, Escherichia coli SE15, Escherichia coli DH1, Escherichia coli 'BL21-Gold(DE3)pLysS AG', Klebsiella michiganensis KCTC 1686, Klebsiella michiganensis RC10, Klebsiella michiganensis AR375, Klebsiella michiganensis KNU07, Klebsiella michiganensis E718, Klebsiella sp. D5A, Klebsiella quasipneumoniae subsp. similipneumoniae G747, Klebsiella quasip…	Degradation.AROMATIC-COMPOUNDS-DEGRADATION.Catechol-Degradation.CATECHOL-ORTHO-CLEAVAGE-PWY.
113	L-histidine degradation II	58/2434	1.0	1.4	Desulfovibrio, Delftia, Escherichia coli, Klebsiella, Aquabacterium	Escherichia coli ABWA45, Escherichia coli KL53, Escherichia coli ECONIH5, Escherichia coli ECONIH4, Klebsiella michiganensis KCTC 1686, Klebsiella michiganensis M1, Klebsiella michiganensis RC10, Klebsiella michiganensis K516, Klebsiella michiganensis K518, Klebsiella michiganensis AR375, Klebsiella michiganensis M82255, Klebsiella michiganensis KNU07, Klebsiella michiganensis FDAARGOS_647, Klebs…	Degradation.Amino-Acid-Degradation.Proteinogenic-Amino-Acids-Degradation.HISTIDINE-DEG.PWY-5028.
114	indole-3-acetate biosynthesis IV (bacteria)	360/2434	0.5	0.5	Desulfovibrio, Delftia, Escherichia coli, Klebsiella, Aquabacterium	Escherichia coli str. K-12 substr. MDS42, Escherichia coli O104:H4 str. 2011C-3493, Escherichia coli ER2796, Escherichia coli str. K-12 substr. MC4100, Escherichia coli KLY, Escherichia coli O27:H7, Escherichia coli str. K-12 substr. MG1655 JW5437-1 substr. MG1655, Escherichia coli D8, Escherichia coli K-12 substr. HMS174, Escherichia coli D4, Escherichia coli tolC-, Escherichia coli MGY, Escheri…	Biosynthesis.HORMONE-SYN.Plant-Hormone-Biosynthesis.Auxin-Biosynthesis.PWY-5025.
115	ethanol degradation IV	33/2434	1.0	2.33	Desulfovibrio, Delftia, Escherichia coli, Klebsiella, Parabacteroides	Escherichia coli JJ1886, Escherichia coli ETEC H10407, Escherichia coli SE15, Escherichia coli DH1, Escherichia coli O26:H11 str. 11368, Escherichia coli 'BL21-Gold(DE3)pLysS AG', Klebsiella michiganensis KCTC 1686, Klebsiella michiganensis E718, Klebsiella variicola At-22, Klebsiella pneumoniae JH1, Klebsiella pneumoniae KCTC 2242, Klebsiella pneumoniae subsp. pneumoniae Kp13, Klebsiella pneumon…	Degradation.Alcohol-Degradation.Ethanol-Degradation.PWY66-162.
116	glycine betaine biosynthesis I (Gram-negative bacteria)	409/2434	1.0	1	Desulfovibrio, Delftia, Escherichia coli, Klebsiella, Proteus	Escherichia coli NA114, Escherichia coli O104:H4 TY-2482, Escherichia coli O104:H4 LB226692, Escherichia coli O157 Al Ain, Escherichia coli O157 AR-0430, Escherichia coli O157 AR-0429, Escherichia coli O157 AR-0428, Escherichia coli O157 AR-0427, Escherichia coli UMNF18, Escherichia coli O26 str. RM8426, Escherichia coli str. K-12 substr. MDS42, Escherichia coli str. K-12 substr. MDS42 MDS42 subs…
117	choline degradation I	387/2434	1.0	1	Desulfovibrio, Delftia, Escherichia coli, Klebsiella, Proteus	Escherichia coli NA114, Escherichia coli O104:H4 TY-2482, Escherichia coli O104:H4 LB226692, Escherichia coli O157 Al Ain, Escherichia coli O157 AR-0430, Escherichia coli O157 AR-0429, Escherichia coli O157 AR-0428, Escherichia coli O157 AR-0427, Escherichia coli UMNF18, Escherichia coli O26 str. RM8426, Escherichia coli str. K-12 substr. MDS42, Escherichia coli str. K-12 substr. MDS42 MDS42 subs…
118	formate to nitrite electron transfer	657/2434	0.67	1.33	Desulfovibrio, Delftia, Escherichia coli, Klebsiella, Selenomonas	Escherichia coli PCN033, Escherichia coli O104:H4 FDAARGOS_348, Escherichia coli O104:H4 FDAARGOS_349, Escherichia coli O104:H4 FWSEC0009, Escherichia coli O157 180-PT54, Escherichia coli O157 644-PT8, Escherichia coli O157 FDAARGOS_293, Escherichia coli O157 Al Ain, Escherichia coli O157 AR-0430, Escherichia coli O157 AR-0429, Escherichia coli O157 AR-0428, Escherichia coli O157 AR-0427, Escheri…
119	toluene degradation to 4-methylphenol	21/2434	0.25	0.25	Desulfovibrio, Delftia, Klebsiella	Klebsiella michiganensis KCTC 1686, Klebsiella michiganensis E718, Klebsiella sp. D5A, Klebsiella variicola At-22, Klebsiella pneumoniae JH1, Klebsiella pneumoniae 1162281, Klebsiella pneumoniae KCTC 2242, Klebsiella pneumoniae subsp. pneumoniae Kp13, Klebsiella pneumoniae subsp. pneumoniae HS11286, Klebsiella pneumoniae subsp. pneumoniae DSM 30104, Klebsiella pneumoniae subsp. pneumoniae 1084, K…	Degradation.AROMATIC-COMPOUNDS-DEGRADATION.TOLUENE-DEG.TOLUENE-DEG-4-OH-PWY.
120	trehalose biosynthesis III	7/2434	1.0	1	Desulfovibrio, Delftia, Klebsiella	Klebsiella michiganensis E718, Klebsiella variicola At-22, Klebsiella pneumoniae subsp. pneumoniae HS11286, Klebsiella pneumoniae subsp. pneumoniae 1084, Klebsiella pneumoniae JM45, Delftia acidovorans SPH-1, Desulfovibrio gigas DSM 1382 = ATCC 19364	Biosynthesis.Metabolic-Regulators.Organic-solutes-Biosynthesis.Trehalose-biosynthesis.TREHALOSESYN-PWY./Biosynthesis.Carbohydrates-Biosynthesis.CARBO-BIOSYNTHESIS.Trehalose-biosynthesis.TREHALOSESYN-PWY.
121	trehalose biosynthesis II	7/2434	1.0	1	Desulfovibrio, Delftia, Klebsiella	Klebsiella michiganensis E718, Klebsiella variicola At-22, Klebsiella pneumoniae subsp. pneumoniae HS11286, Klebsiella pneumoniae subsp. pneumoniae 1084, Klebsiella pneumoniae JM45, Delftia acidovorans SPH-1, Desulfovibrio gigas DSM 1382 = ATCC 19364	Biosynthesis.Metabolic-Regulators.Organic-solutes-Biosynthesis.Trehalose-biosynthesis.PWY-881./Biosynthesis.Carbohydrates-Biosynthesis.CARBO-BIOSYNTHESIS.Trehalose-biosynthesis.PWY-881.
122	autoinducer AI-1 biosynthesis	3/2434	1.0	1	Desulfovibrio, Delftia, Klebsiella	Klebsiella michiganensis RC10, Delftia sp. Cs1-4, Desulfovibrio magneticus str. Maddingley MBC34	Biosynthesis.SECONDARY-METABOLITE-BIOSYNTHESIS.Autoinducer-Biosynthesis.PWY-6157.
123	salicylate biosynthesis I	7/2434	0.5	0.5	Desulfovibrio, Delftia, Klebsiella, Lactococcus	Klebsiella michiganensis E718, Lactococcus piscium MKFS47, Delftia tsuruhatensis CM13, Delftia sp. HK171, Desulfovibrio sp. Dsv1, Desulfovibrio sp. G11, Desulfovibrio desulfuricans subsp. desulfuricans DSM 642	Biosynthesis.AROMATIC-COMPOUNDS-BIOSYN.Salicylate-Biosynthesis.PWY-6406.
124	indole-3-acetate biosynthesis III (bacteria)	23/2434	0.5	0.5	Desulfovibrio, Delftia, Lactobacillus, Escherichia coli, Klebsiella	Lactobacillus brevis SRCM101174, Lactobacillus brevis SRCM101106, Escherichia coli CFT073, Escherichia coli Nissle 1917, Escherichia coli F11, Escherichia coli 536, Escherichia coli UTI89, Escherichia coli ABU 83972, Klebsiella pneumoniae KCTC 2242, Klebsiella pneumoniae subsp. pneumoniae Kp13, Klebsiella pneumoniae subsp. pneumoniae 1084, Klebsiella pneumoniae CG43, Klebsiella pneumoniae JM45, K…	Biosynthesis.HORMONE-SYN.Plant-Hormone-Biosynthesis.Auxin-Biosynthesis.PWY-3161.
125	meso-butanediol biosynthesis II	28/2434	1.0	1	Desulfovibrio, Delftia, Lactobacillus, Klebsiella, Lactococcus	Lactobacillus brevis subsp. gravesensis ATCC 27305, Lactobacillus reuteri I5007, Lactobacillus fermentum 3872, Lactobacillus fermentum CECT 5716, Lactobacillus acidipiscis KCTC 13900, Klebsiella pneumoniae 30660/NJST258_1, Klebsiella pneumoniae 30684/NJST258_2, Lactococcus lactis subsp. lactis IO-1, Lactococcus lactis subsp. cremoris A76, Lactococcus lactis subsp. lactis NCDO 2118, Lactococcus la…	Energy-Metabolism.Fermentation.Alcohol-Biosynthesis.Butanediol-Biosynthesis.PWY-6392.
126	meso-butanediol biosynthesis I	28/2434	1.0	1	Desulfovibrio, Delftia, Lactobacillus, Klebsiella, Lactococcus	Lactobacillus brevis subsp. gravesensis ATCC 27305, Lactobacillus reuteri I5007, Lactobacillus fermentum 3872, Lactobacillus fermentum CECT 5716, Lactobacillus acidipiscis KCTC 13900, Klebsiella pneumoniae 30660/NJST258_1, Klebsiella pneumoniae 30684/NJST258_2, Lactococcus lactis subsp. lactis IO-1, Lactococcus lactis subsp. cremoris A76, Lactococcus lactis subsp. lactis NCDO 2118, Lactococcus la…	Energy-Metabolism.Fermentation.Alcohol-Biosynthesis.Butanediol-Biosynthesis.PWY-6391.
127	tRNA-uridine 2-thiolation (bacteria)	173/2434	0.25	0.5	Desulfovibrio, Escherichia coli	Escherichia coli O157 Al Ain, Escherichia coli O157 AR-0430, Escherichia coli O157 AR-0429, Escherichia coli O157 AR-0428, Escherichia coli O157 AR-0427, Escherichia coli O26 str. RM8426, Escherichia coli O43 str. RM10042, Escherichia coli O121 str. RM8352, Escherichia coli str. K-12 substr. MDS42, Escherichia coli str. K-12 substr. MDS42 MDS42 substr. SynA, Escherichia coli str. K-12 substr. MDS…
128	formate to trimethylamine N-oxide electron transfer	71/2434	1.0	4.5	Desulfovibrio, Escherichia coli, Klebsiella	Escherichia coli NA114, Escherichia coli O104:H4 TY-2482, Escherichia coli O104:H4 LB226692, Escherichia coli UMNF18, Escherichia coli J96, Escherichia coli ATCC 25922, Escherichia coli JJ1886, Escherichia coli O157:H7 str. EDL933, Escherichia coli CFT073, Escherichia coli 042, Escherichia coli str. K-12 substr. DH10B, Escherichia coli str. K-12 substr. W3110, Escherichia coli Nissle 1917, Escher…	Energy-Metabolism.Respiration.ANAEROBIC-RESPIRATION.PWY0-1355./Energy-Metabolism.Electron-Transfer.PWY0-1355.
129	putrescine degradation II	436/2434	0.5	0.5	Desulfovibrio, Escherichia coli, Klebsiella	Escherichia coli O104:H4 TY-2482, Escherichia coli O104:H4 FDAARGOS_348, Escherichia coli O104:H4 FDAARGOS_349, Escherichia coli O104:H4 LB226692, Escherichia coli O157 FDAARGOS_293, Escherichia coli UMNF18, Escherichia coli O26 str. RM10386, Escherichia coli O103 str. RM8385, Escherichia coli O111 str. RM9322, Escherichia coli O121 str. RM8352, Escherichia coli O104:H4 str. 2011C-3493, Escherich…
130	trehalose biosynthesis VI	13/2434	1.0	1	Desulfovibrio, Escherichia coli, Klebsiella	Escherichia coli B7A, Klebsiella michiganensis KCTC 1686, Klebsiella michiganensis E718, Klebsiella sp. D5A, Klebsiella pneumoniae subsp. pneumoniae 1084, Klebsiella pneumoniae 342, Desulfovibrio inopinatus DSM 10711, Desulfovibrio cf. magneticus IFRC170, Desulfovibrio sp. FW1012B, Desulfovibrio sp. U5L, Desulfovibrio fructosovorans JJ, Desulfovibrio gigas DSM 1382 = ATCC 19364, Desulfovibrio sp.…	Biosynthesis.Metabolic-Regulators.Organic-solutes-Biosynthesis.Trehalose-biosynthesis.PWY-5983./Biosynthesis.Carbohydrates-Biosynthesis.CARBO-BIOSYNTHESIS.Trehalose-biosynthesis.PWY-5983.
131	formate to dimethyl sulfoxide electron transfer	300/2434	1.0	2	Desulfovibrio, Escherichia coli, Klebsiella	Escherichia coli NA114, Escherichia coli O104:H4 TY-2482, Escherichia coli O104:H4 LB226692, Escherichia coli O157 Al Ain, Escherichia coli O157 AR-0430, Escherichia coli O157 AR-0429, Escherichia coli O157 AR-0428, Escherichia coli O157 AR-0427, Escherichia coli UMNF18, Escherichia coli O26 str. RM8426, Escherichia coli str. K-12 substr. MDS42, Escherichia coli str. K-12 substr. MDS42 MDS42 subs…
132	L-phenylalanine degradation II (anaerobic)	716/2434	0.67	1	Desulfovibrio, Escherichia coli, Klebsiella	Escherichia coli O104:H4 TY-2482, Escherichia coli O104:H4 FDAARGOS_348, Escherichia coli O104:H4 FDAARGOS_349, Escherichia coli O104:H4 LB226692, Escherichia coli O157 Al Ain, Escherichia coli O157 AR-0430, Escherichia coli O157 AR-0429, Escherichia coli O157 AR-0428, Escherichia coli O157 AR-0427, Escherichia coli UMNF18, Escherichia coli O26 str. RM8426, Escherichia coli O26 str. RM10386, Esch…
133	gentisate degradation I	8/2434	0.33	0.33	Desulfovibrio, Escherichia coli, Klebsiella	Escherichia coli O139:H28 str. E24377A, Escherichia coli O157:H7_EC4206, Escherichia coli O157:H7_EC4045, Escherichia coli O157:H7_EC4042, Escherichia coli O157:H7_TW14588, Klebsiella michiganensis KCTC 1686, Klebsiella michiganensis E718, Desulfovibrio sp. FW1012B	Degradation.AROMATIC-COMPOUNDS-DEGRADATION.Gentisate-Degradation.PWY-6223.
134	trehalose biosynthesis VII	13/2434	1.0	1	Desulfovibrio, Escherichia coli, Klebsiella	Escherichia coli B7A, Klebsiella michiganensis KCTC 1686, Klebsiella michiganensis E718, Klebsiella sp. D5A, Klebsiella pneumoniae subsp. pneumoniae 1084, Klebsiella pneumoniae 342, Desulfovibrio inopinatus DSM 10711, Desulfovibrio cf. magneticus IFRC170, Desulfovibrio sp. FW1012B, Desulfovibrio sp. U5L, Desulfovibrio fructosovorans JJ, Desulfovibrio gigas DSM 1382 = ATCC 19364, Desulfovibrio sp.…	Biosynthesis.Metabolic-Regulators.Organic-solutes-Biosynthesis.Trehalose-biosynthesis.PWY-5985./Biosynthesis.Carbohydrates-Biosynthesis.CARBO-BIOSYNTHESIS.Trehalose-biosynthesis.PWY-5985.
135	NADH to trimethylamine N-oxide electron transfer	69/2434	1.0	8.5	Desulfovibrio, Escherichia coli, Klebsiella	Escherichia coli NA114, Escherichia coli O104:H4 TY-2482, Escherichia coli O104:H4 LB226692, Escherichia coli UMNF18, Escherichia coli J96, Escherichia coli ATCC 25922, Escherichia coli JJ1886, Escherichia coli O157:H7 str. EDL933, Escherichia coli CFT073, Escherichia coli 042, Escherichia coli str. K-12 substr. DH10B, Escherichia coli str. K-12 substr. W3110, Escherichia coli Nissle 1917, Escher…	Energy-Metabolism.Respiration.ANAEROBIC-RESPIRATION.PWY0-1347./Energy-Metabolism.Electron-Transfer.PWY0-1347.
136	phenol degradation I (aerobic)	12/2434	1.0	1	Desulfovibrio, Escherichia coli, Klebsiella	Escherichia coli 13C1065T, Escherichia coli E706, Escherichia coli ECCWS199, Escherichia coli CP53, Escherichia coli EC17GD31, Escherichia coli NCYU-29-69, Escherichia coli NCYU-25-82, Escherichia coli YPE10, Klebsiella quasipneumoniae TH114, Klebsiella pneumoniae LH94, Klebsiella pneumoniae TH164, Desulfovibrio alaskensis G20	Degradation.AROMATIC-COMPOUNDS-DEGRADATION.Phenolic-Compounds-Degradation.Phenol-Degradation.PWY-5418.
137	dimethyl sulfoxide degradation	11/2434	1.0	1	Desulfovibrio, Escherichia coli, Klebsiella	Escherichia coli NA114, Escherichia coli JJ1886, Escherichia coli O157:H7_EC4206, Escherichia coli O157:H7_EC4045, Escherichia coli O157:H7_EC4042, Escherichia coli O157:H7_TW14588, Klebsiella michiganensis KCTC 1686, Klebsiella pneumoniae CG43, Klebsiella pneumoniae 30660/NJST258_1, Klebsiella pneumoniae 30684/NJST258_2, Desulfovibrio brasiliensis JCM 12178	Degradation.Noncarbon-Nutrients.Sulfur-Metabolism.PWY-6050.
138	NADH to dimethyl sulfoxide electron transfer	75/2434	1.0	8	Desulfovibrio, Escherichia coli, Klebsiella	Escherichia coli NA114, Escherichia coli O104:H4 TY-2482, Escherichia coli O104:H4 LB226692, Escherichia coli UMNF18, Escherichia coli J96, Escherichia coli ATCC 25922, Escherichia coli JJ1886, Escherichia coli O157:H7 str. EDL933, Escherichia coli CFT073, Escherichia coli 042, Escherichia coli str. K-12 substr. DH10B, Escherichia coli str. K-12 substr. W3110, Escherichia coli Nissle 1917, Escher…	Energy-Metabolism.Respiration.ANAEROBIC-RESPIRATION.PWY0-1348./Energy-Metabolism.Electron-Transfer.PWY0-1348.
139	cytidylyl molybdenum cofactor biosynthesis	960/2434	1.0	1	Desulfovibrio, Escherichia coli, Klebsiella, Morganella, Enterococcus	Escherichia coli PCN033, Escherichia coli NA114, Escherichia coli O104:H4 TY-2482, Escherichia coli O104:H4 FDAARGOS_348, Escherichia coli O104:H4 FDAARGOS_349, Escherichia coli O104:H4 FWSEC0009, Escherichia coli O104:H4 LB226692, Escherichia coli O157 180-PT54, Escherichia coli O157 644-PT8, Escherichia coli O157 FDAARGOS_293, Escherichia coli O157 Al Ain, Escherichia coli O157 AR-0430, Escheri…
140	ammonia oxidation III	22/2434	0.33	0.33	Desulfovibrio, Escherichia coli, Klebsiella, Morganella, Proteus	Escherichia coli ETEC H10407, Klebsiella michiganensis RC10, Klebsiella michiganensis KNU07, Klebsiella variicola GJ1, Klebsiella variicola GJ2, Klebsiella variicola GJ3, Klebsiella pneumoniae CAV1016, Morganella morganii FDAARGOS_63, Morganella morganii KC-Tt-01, Morganella morganii AR_0133, Proteus mirabilis HI4320, Proteus mirabilis AR_0155, Proteus mirabilis AR_0156, Proteus mirabilis T21, Pr…	Degradation.Noncarbon-Nutrients.NITROGEN-DEG.Ammonia-oxidation.PWY-2242.
141	polymyxin resistance	1441/2434	0.67	0.67	Desulfovibrio, Escherichia coli, Klebsiella, Morganella, Proteus	Escherichia coli PCN033, Escherichia coli NA114, Escherichia coli O104:H4 TY-2482, Escherichia coli O104:H4 FDAARGOS_348, Escherichia coli O104:H4 FDAARGOS_349, Escherichia coli O104:H4 FWSEC0009, Escherichia coli O104:H4 LB226692, Escherichia coli O157 180-PT54, Escherichia coli O157 644-PT8, Escherichia coli O157 FDAARGOS_293, Escherichia coli O157 Al Ain, Escherichia coli O157 AR-0430, Escheri…
142	L-ascorbate biosynthesis III	6/2434	0.25	0.25	Desulfovibrio, Klebsiella	Klebsiella pneumoniae JH1, Klebsiella pneumoniae 30660/NJST258_1, Klebsiella pneumoniae 30684/NJST258_2, Desulfovibrio cf. magneticus IFRC170, Desulfovibrio putealis DSM 16056, Desulfovibrio sp. FW1012B	Biosynthesis.Cofactor-Biosynthesis.Vitamin-Biosynthesis.Ascorbate-Biosynthesis.PWY-5521.
143	2-keto-L-gulonate biosynthesis	6/2434	0.25	0.25	Desulfovibrio, Klebsiella	Klebsiella pneumoniae JH1, Klebsiella pneumoniae 30660/NJST258_1, Klebsiella pneumoniae 30684/NJST258_2, Desulfovibrio cf. magneticus IFRC170, Desulfovibrio putealis DSM 16056, Desulfovibrio sp. FW1012B	Biosynthesis.Carbohydrates-Biosynthesis.PWY-5782.
144	indole-3-acetate biosynthesis VI (bacteria)	470/2434	0.33	0.33	Desulfovibrio, Klebsiella, Proteus	Klebsiella michiganensis KCTC 1686, Klebsiella michiganensis M1, Klebsiella michiganensis RC10, Klebsiella michiganensis K516, Klebsiella michiganensis K518, Klebsiella michiganensis AR375, Klebsiella michiganensis M82255, Klebsiella michiganensis KNU07, Klebsiella michiganensis FDAARGOS_647, Klebsiella michiganensis C52, Klebsiella michiganensis E718, Klebsiella michiganensis HKOPL1, Klebsiella …	Biosynthesis.HORMONE-SYN.Plant-Hormone-Biosynthesis.Auxin-Biosynthesis.TRPIAACAT-PWY.
145	glycolysis II (from fructose 6-phosphate)	3/2434	0.9	1.2	Desulfovibrio, Lactobacillus	Lactobacillus fermentum F-6, Desulfovibrio sp. Dsv1, Desulfovibrio oxyclinae DSM 11498	Energy-Metabolism.GLYCOLYSIS-VARIANTS.PWY-5484.
146	L-lysine degradation IV	9/2434	0.2	0.2	Desulfovibrio, Lactobacillus, Enterococcus	Lactobacillus brevis SRCM101174, Lactobacillus brevis SRCM101106, Enterococcus gilvus ATCC BAA-350, Enterococcus avium ATCC 14025, Enterococcus durans ATCC 6056 ASWM, Enterococcus durans IPLA 655, Enterococcus mundtii CRL35, Enterococcus malodoratus ATCC 43197, Desulfovibrio dechloracetivorans BerOc1	Degradation.Amino-Acid-Degradation.Proteinogenic-Amino-Acids-Degradation.LYSINE-DEG.PWY-5280.
147	trehalose degradation III	108/2434	1.0	1	Desulfovibrio, Lactobacillus, Lactococcus, Enterococcus	Lactobacillus brevis KB290, Lactobacillus brevis BSO 464, Lactobacillus brevis NPS-QW-145, Lactobacillus brevis TMW 1.2113, Lactobacillus brevis TMW 1.2108, Lactobacillus brevis TMW 1.2111, Lactobacillus brevis 100D8, Lactobacillus brevis BDGP6, Lactobacillus brevis ATCC 367, Lactobacillus brevis ATCC 14869 = DSM 20054, Lactobacillus buchneri NRRL B-30929, Lactobacillus helveticus MTCC 5463, Lact…	Degradation.Carbohydrates-Degradation.Sugars-And-Polysaccharides-Degradation.Trehalose-Degradation.PWY-2721.
148	L-leucine degradation III	8/2434	1.0	1	Desulfovibrio, Lactococcus	Lactococcus lactis subsp. lactis IO-1, Lactococcus lactis subsp. lactis NCDO 2118, Lactococcus lactis subsp. cremoris KW2, Lactococcus lactis AI06, Lactococcus lactis subsp. lactis S0, Lactococcus lactis subsp. lactis KLDS 4.0325, Desulfovibrio magneticus RS-1, Desulfovibrio sp. FW1012B	Degradation.Amino-Acid-Degradation.Proteinogenic-Amino-Acids-Degradation.LEUCINE-DEG.PWY-5076.
149	nitrite-dependent anaerobic methane oxidation	11/2434	0.5	0.5	Desulfovibrio, Megasphaera, Escherichia coli, Klebsiella	Megasphaera hexanoica MH, Megasphaera elsdenii 14-14, Escherichia coli JJ1886, Escherichia coli SE15, Klebsiella pneumoniae subsp. pneumoniae HS11286, Klebsiella pneumoniae subsp. pneumoniae 1084, Klebsiella pneumoniae JM45, Desulfovibrio brasiliensis JCM 12178, Desulfovibrio aminophilus DSM 12254, Desulfovibrio desulfuricans subsp. desulfuricans DSM 642, Desulfovibrio desulfuricans ATCC 27774	Degradation.Noncarbon-Nutrients.NITROGEN-DEG.Denitrification.PWY-6523./Degradation.C1-COMPOUNDS.Methane-Oxidation.PWY-6523.
150	phosphonoacetate degradation	14/2434	1.0	1	Desulfovibrio, Parabacteroides, Klebsiella, Lactococcus, Enterococcus	Klebsiella quasipneumoniae CAV1947, Klebsiella quasipneumoniae CAV2018, Klebsiella quasipneumoniae CAV2013, Enterococcus faecium DO, Enterococcus mundtii EMB156, Lactococcus lactis subsp. cremoris JM2, Lactococcus lactis subsp. lactis S0, Lactococcus lactis subsp. lactis 275, Lactococcus lactis subsp. lactis UC063, Lactococcus lactis subsp. lactis UL8, Lactococcus lactis subsp. lactis CV56, Lacto…	Degradation.Noncarbon-Nutrients.Phosphorus-Compounds.P483-PWY.
151	thio-molybdenum cofactor biosynthesis	5/2434	1.0	1	Desulfovibrio, Parvimonas micra, Klebsiella, Parvimonas	Parvimonas micra NCTC11808, Parvimonas micra KCOM 1535; ChDC B708, Parvimonas micra NCTC11808, Parvimonas micra KCOM 1535; ChDC B708, Klebsiella pneumoniae 30660/NJST258_1, Klebsiella pneumoniae 30684/NJST258_2, Desulfovibrio sp. FW1012B	Biosynthesis.Cofactor-Biosynthesis.PWY-5963.
152	hyaluronan degradation	10/2434	0.5	0.5	Enterococcus	Enterococcus faecium E745, Enterococcus faecium 2014-VREF-41, Enterococcus faecium K60-39, Enterococcus faecium A_020709_82, Enterococcus faecium AUSMDU00004167, Enterococcus faecium RBWH1, Enterococcus faecium VVEswe-R, Enterococcus faecium VVEswe-S, Enterococcus faecium V1836, Enterococcus faecium DO	Degradation.Polymer-Degradation.POLYSACCHARIDES-DEG.Glycosaminoglycan-Degradation.PWY-7645./Degradation.Carbohydrates-Degradation.POLYSACCHARIDES-DEG.Glycosaminoglycan-Degradation.PWY-7645.
153	L-phenylalanine biosynthesis II	86/2434	0.33	0.67	Enterococcus, Desulfovibrio, Lactobacillus, Selenomonas, Lactococcus, Klebsiella	Lactobacillus plantarum subsp. plantarum NC8, Lactobacillus plantarum WJL, Lactobacillus plantarum KP, Lactobacillus plantarum DF, Lactobacillus plantarum C410L1, Lactobacillus plantarum MF1298, Lactobacillus plantarum LP2, Lactobacillus plantarum BLS41, Lactobacillus plantarum TMW 1.25, Lactobacillus plantarum TMW 1.277, Lactobacillus plantarum TMW 1.708, Lactobacillus plantarum dm, Lactobacillu…	Biosynthesis.Amino-Acid-Biosynthesis.IND-AMINO-ACID-SYN.PHENYLALANINE-SYN.PWY-3462.
154	galactitol degradation	1059/2434	0.4	1	Enterococcus, Lactobacillus, Selenomonas, Oxalobacter, Fusobacterium, Escherichia coli, Klebsiella	Lactobacillus paracasei LC355, Lactobacillus paracasei SRCM103299, Lactobacillus paracasei 10266, Escherichia coli PCN033, Escherichia coli NA114, Escherichia coli O104:H4 TY-2482, Escherichia coli O104:H4 FDAARGOS_348, Escherichia coli O104:H4 FDAARGOS_349, Escherichia coli O104:H4 FWSEC0009, Escherichia coli O104:H4 LB226692, Escherichia coli O157 180-PT54, Escherichia coli O157 644-PT8, Escher…
155	GDP-L-colitose biosynthesis	6/2434	0.2	0.2	Escherichia coli	Escherichia coli O111 str. RM9322, Escherichia coli O104:H4 str. 2011C-3493, Escherichia coli O111:H-, Escherichia coli O182:H21, Escherichia coli O111:NM, Escherichia coli BL21(DE3)	Biosynthesis.Carbohydrates-Biosynthesis.CARBO-BIOSYNTHESIS.SUGAR-NUCLEOTIDES.GDP-Sugar-Biosynthesis.PWY-5740.
156	pyridoxal 5'-phosphate salvage II (plants)	279/2434	1.0	1.44	Escherichia coli	Escherichia coli PCN033, Escherichia coli O104:H4 FWSEC0009, Escherichia coli O157 180-PT54, Escherichia coli O157 644-PT8, Escherichia coli O157 Al Ain, Escherichia coli O157 AR-0430, Escherichia coli O157 AR-0429, Escherichia coli O157 AR-0428, Escherichia coli O157 AR-0427, Escherichia coli O104:H4 str. C227-11, Escherichia coli O55:H7 str. RM12579, Escherichia coli O26 str. RM8426, Escherichi…
157	anthranilate degradation I (aerobic)	1/2434	1.0	2	Escherichia coli	Escherichia coli B7A	Degradation.AROMATIC-COMPOUNDS-DEGRADATION.2-Aminobenzoate-Degradation.PWY-6079.
158	GDP-D-perosamine biosynthesis	77/2434	1.0	1.5	Escherichia coli	Escherichia coli O157 Al Ain, Escherichia coli O157 AR-0430, Escherichia coli O157 AR-0429, Escherichia coli O157 AR-0428, Escherichia coli O157 AR-0427, Escherichia coli O157:H7_TW14588, Escherichia coli 2009C-3554, Escherichia coli 2009C-3378, Escherichia coli 08-3918, Escherichia coli 06-3462, Escherichia coli 2009C-4687, Escherichia coli 2010C-3347, Escherichia coli 2010C-3142, Escherichia co…	Biosynthesis.Carbohydrates-Biosynthesis.CARBO-BIOSYNTHESIS.SUGAR-NUCLEOTIDES.GDP-Sugar-Biosynthesis.PWY-5739.
159	3,6-anhydro-&alpha;-L-galactopyranose degradation	2/2434	0.43	0.5	Escherichia coli	Escherichia coli 2013C-4390, Escherichia coli NCTC11105	Degradation.Carbohydrates-Degradation.Sugars-And-Polysaccharides-Degradation.PWY-7562.
160	D-lactate to cytochrome bo oxidase electron transfer	863/2434	0.5	3	Escherichia coli	Escherichia coli PCN033, Escherichia coli O104:H4 FDAARGOS_348, Escherichia coli O104:H4 FDAARGOS_349, Escherichia coli O104:H4 FWSEC0009, Escherichia coli O157 180-PT54, Escherichia coli O157 644-PT8, Escherichia coli O157 FDAARGOS_293, Escherichia coli O157 Al Ain, Escherichia coli O157 AR-0430, Escherichia coli O157 AR-0429, Escherichia coli O157 AR-0428, Escherichia coli O157 AR-0427, Escheri…
161	Escherichia coli serotype O86 O-antigen biosynthesis	231/2434	0.33	0.33	Escherichia coli	Escherichia coli O104:H4 FDAARGOS_348, Escherichia coli O104:H4 FDAARGOS_349, Escherichia coli O104:H4 FWSEC0009, Escherichia coli O157 180-PT54, Escherichia coli O157 644-PT8, Escherichia coli O157 FDAARGOS_293, Escherichia coli O157 Al Ain, Escherichia coli O157 AR-0430, Escherichia coli O157 AR-0429, Escherichia coli O157 AR-0428, Escherichia coli O157 AR-0427, Escherichia coli O104:H4 str. C2…
162	&gamma;-linolenate biosynthesis II (animals)	1/2434	1.0	1	Escherichia coli	Escherichia coli JJ1886	Biosynthesis.Lipid-Biosynthesis.Fatty-acid-biosynthesis.Unsaturated-Fatty-Acids-Biosynthesis.Gamma-linolenate-Biosynthesis.PWY-6000.
163	aminopropanol phosphate biosynthesis II	158/2434	0.5	0.75	Escherichia coli	Escherichia coli O157 Al Ain, Escherichia coli O157 AR-0430, Escherichia coli O157 AR-0429, Escherichia coli O157 AR-0428, Escherichia coli O157 AR-0427, Escherichia coli O26 str. RM8426, Escherichia coli str. K-12 substr. MDS42, Escherichia coli str. K-12 substr. MDS42 MDS42 substr. SynA, Escherichia coli str. K-12 substr. MDS42 MDS42 substr. SynC, Escherichia coli str. K-12 substr. MDS42 SynAC …
164	tetrapyrrole biosynthesis II (from glycine)	1/2434	0.5	0.5	Escherichia coli	Escherichia coli NCTC12655	Biosynthesis.Cofactor-Biosynthesis.Tetrapyrrole-Biosynthesis.PWY-5189.
165	pyochelin biosynthesis	8/2434	0.1	0.1	Escherichia coli	Escherichia coli O104:H4 TY-2482, Escherichia coli O104:H4 LB226692, Escherichia coli Nissle 1917, Escherichia coli E110019, Escherichia coli F11, Escherichia coli 53638, Escherichia coli IAI39, Escherichia coli LF82	Biosynthesis.SECONDARY-METABOLITE-BIOSYNTHESIS.Siderophores-Biosynthesis.PWY-6408.
166	NADH to hydrogen peroxide electron transfer	2/2434	0.5	0.5	Escherichia coli	Escherichia coli 1190, Escherichia coli O83:H1 str. NRG 857C	Energy-Metabolism.Electron-Transfer.PWY0-1590.
167	&beta;-D-galactosaminyl-(1&rarr;3)-N-acetyl-&alpha;-D-galactosamine biosynthesis	235/2434	0.67	0.67	Escherichia coli	Escherichia coli O104:H4 FDAARGOS_348, Escherichia coli O104:H4 FDAARGOS_349, Escherichia coli O104:H4 FWSEC0009, Escherichia coli O157 180-PT54, Escherichia coli O157 644-PT8, Escherichia coli O157 FDAARGOS_293, Escherichia coli O157 Al Ain, Escherichia coli O157 AR-0430, Escherichia coli O157 AR-0429, Escherichia coli O157 AR-0428, Escherichia coli O157 AR-0427, Escherichia coli O104:H4 str. C2…
168	cardiolipin biosynthesis III	352/2434	1.0	1.67	Escherichia coli	Escherichia coli O104:H4 FDAARGOS_348, Escherichia coli O104:H4 FDAARGOS_349, Escherichia coli O157 FDAARGOS_293, Escherichia coli O26 str. RM10386, Escherichia coli O103 str. RM8385, Escherichia coli O111 str. RM9322, Escherichia coli O145 str. RM9872, Escherichia coli O91 str. RM7190, Escherichia coli NCCP15648, Escherichia coli ER2796, Escherichia coli O145:H28 str. RM12761, Escherichia coli O…
169	heme degradation V	329/2434	0.67	0.67	Escherichia coli	Escherichia coli PCN033, Escherichia coli O157 180-PT54, Escherichia coli O157 644-PT8, Escherichia coli O157 FDAARGOS_293, Escherichia coli O157 Al Ain, Escherichia coli O157 AR-0430, Escherichia coli O157 AR-0429, Escherichia coli O157 AR-0428, Escherichia coli O157 AR-0427, Escherichia coli O55:H7 str. RM12579, Escherichia coli O145 str. RM9872, Escherichia coli O7:K1 str. CE10, Escherichia co…
170	L-carnitine degradation III	293/2434	0.33	0.67	Escherichia coli	Escherichia coli PCN033, Escherichia coli O104:H4 FWSEC0009, Escherichia coli O157 180-PT54, Escherichia coli O157 644-PT8, Escherichia coli O157 Al Ain, Escherichia coli O157 AR-0430, Escherichia coli O157 AR-0429, Escherichia coli O157 AR-0428, Escherichia coli O157 AR-0427, Escherichia coli O104:H4 str. C227-11, Escherichia coli O55:H7 str. RM12579, Escherichia coli O26 str. RM8426, Escherichi…
171	ferulate degradation	2/2434	0.67	0.67	Escherichia coli	Escherichia coli JME64, Escherichia coli JME66	Degradation.SECONDARY-METABOLITE-DEGRADATION.PHENYLPROPANOID-DERIVATIVE-DEG.PWY-6343./Degradation.AROMATIC-COMPOUNDS-DEGRADATION.Phenolic-Compounds-Degradation.PHENYLPROPANOID-DERIVATIVE-DEG.PWY-6343.
172	trans-caffeate degradation (aerobic)	16/2434	0.25	0.25	Escherichia coli, Klebsiella	Escherichia coli JME64, Escherichia coli JME66, Klebsiella quasipneumoniae subsp. similipneumoniae ATCC 700603, Klebsiella quasipneumoniae ATCC 700603, Klebsiella quasipneumoniae FDAARGOS_93, Klebsiella pneumoniae subsp. pneumoniae KPNIH27, Klebsiella pneumoniae WCHKP13F2, Klebsiella pneumoniae QS17-0161, Klebsiella pneumoniae AR_0141, Klebsiella pneumoniae AR_0142, Klebsiella pneumoniae AR_0140,…	Degradation.SECONDARY-METABOLITE-DEGRADATION.PHENYLPROPANOID-DERIVATIVE-DEG.PWY-8003./Degradation.AROMATIC-COMPOUNDS-DEGRADATION.Phenolic-Compounds-Degradation.PHENYLPROPANOID-DERIVATIVE-DEG.PWY-8003.
173	Escherichia coli serotype O9a O-antigen biosynthesis	24/2434	0.44	0.44	Escherichia coli, Klebsiella	Escherichia coli PCN061, Escherichia coli Ecol_AZ147, Escherichia coli ECCTRSRTH03, Escherichia coli WCHEC005237, Escherichia coli 13P484A, Escherichia coli 13P460A, Escherichia coli M217, Escherichia coli WCHEC025970, Escherichia coli GZ04-0086, Escherichia coli 2 HS-C, Escherichia coli NCTC9064, Escherichia coli ST540, Klebsiella quasipneumoniae A708, Klebsiella quasipneumoniae SNI47, Klebsiell…	Glycan-O-Antigen-Biosynthesis.PWY-7905./Biosynthesis.Cell-Structure-Biosynthesis.Lipopolysaccharide-Biosynthesis.O-Antigen-Biosynthesis.PWY-7905.
174	&beta;-alanine biosynthesis I	6/2434	1.0	2	Escherichia coli, Klebsiella	Escherichia coli ETEC H10407, Klebsiella michiganensis E718, Klebsiella variicola At-22, Klebsiella pneumoniae subsp. pneumoniae Kp13, Klebsiella pneumoniae subsp. pneumoniae HS11286, Klebsiella pneumoniae subsp. pneumoniae 1084	Biosynthesis.Amino-Acid-Biosynthesis.Other-Amino-Acid-Biosynthesis.Beta-Alanine-Biosynthesis.PWY-3981.
175	D-galactose degradation II	13/2434	0.5	1.5	Escherichia coli, Klebsiella	Escherichia coli UMNF18, Escherichia coli J96, Escherichia coli ATCC 25922, Escherichia coli Nissle 1917, Escherichia coli J53, Escherichia coli NCTC86, Escherichia coli TW11681, Escherichia coli TW10598, Klebsiella sp. D5A, Klebsiella variicola At-22, Klebsiella pneumoniae JH1, Klebsiella pneumoniae 1162281, Klebsiella pneumoniae subsp. pneumoniae DSM 30104	Degradation.Carbohydrates-Degradation.Sugars-And-Polysaccharides-Degradation.GALACTOSE-DEGRADATION.GALDEG-PWY.
176	L-arabinose degradation III	3/2434	0.2	0.2	Escherichia coli, Klebsiella	Escherichia coli TW10598, Klebsiella sp. D5A, Klebsiella pneumoniae CG43	Degradation.Carbohydrates-Degradation.Sugars-And-Polysaccharides-Degradation.L-Arabinose-Degradation.PWY-5517.
177	ethylbenzene degradation (anaerobic)	22/2434	0.2	0.2	Escherichia coli, Klebsiella	Escherichia coli NA114, Escherichia coli JJ1886, Escherichia coli str. K-12 substr. DH10B, Escherichia coli ETEC H10407, Escherichia coli SE15, Escherichia coli O26:H11 str. 11368, Escherichia coli O103:H2 str. 12009, Escherichia coli O111:H- str. 11128, Escherichia coli BW2952, Escherichia coli 'BL21-Gold(DE3)pLysS AG', Klebsiella michiganensis KCTC 1686, Klebsiella michiganensis E718, Klebsiell…	Degradation.AROMATIC-COMPOUNDS-DEGRADATION.PWY-481.
178	L-galactonate degradation	385/2434	1.0	1	Escherichia coli, Klebsiella	Escherichia coli NA114, Escherichia coli O104:H4 TY-2482, Escherichia coli O104:H4 LB226692, Escherichia coli UMNF18, Escherichia coli O111 str. RM9322, Escherichia coli O121 str. RM8352, Escherichia coli O113:H21, Escherichia coli J96, Escherichia coli APEC O78, Escherichia coli ACN001, Escherichia coli ATCC 25922, Escherichia coli JJ1887, Escherichia coli PCN061, Escherichia coli M8, Escherichi…	Degradation.SECONDARY-METABOLITE-DEGRADATION.Sugar-Derivatives.SUGAR-ACIDS-DEG.PWY0-1306./Degradation.CARBOXYLATES-DEG.SUGAR-ACIDS-DEG.PWY0-1306.
179	methylglyoxal degradation II	49/2434	1.0	1	Escherichia coli, Klebsiella	Escherichia coli O104:H4 TY-2482, Escherichia coli O104:H4 LB226692, Escherichia coli UMNF18, Escherichia coli J96, Escherichia coli ATCC 25922, Escherichia coli O157:H7 str. EDL933, Escherichia coli CFT073, Escherichia coli 042, Escherichia coli str. K-12 substr. DH10B, Escherichia coli str. K-12 substr. W3110, Escherichia coli Nissle 1917, Escherichia coli O139:H28 str. E24377A, Escherichia col…	Degradation.Aldehyde-Degradation.Methylglyoxal-Detoxification.PWY-5462./Detoxification.Methylglyoxal-Detoxification.PWY-5462./Detoxification.Methylglyoxal-Detoxification.PWY-901./Degradation.Aldehyde-Degradation.PWY-901.
181	heptadecane biosynthesis	11/2434	0.33	0.33	Escherichia coli, Klebsiella	Escherichia coli 2015C-4136CT1, Escherichia coli RM14723, Escherichia coli RM14715, Klebsiella aerogenes FDAARGOS_327, Klebsiella aerogenes FDAARGOS_513, Klebsiella aerogenes FDAARGOS_152, Klebsiella aerogenes G7, Klebsiella aerogenes FDAARGOS_139, Klebsiella aerogenes AR_0009, Klebsiella aerogenes AR_0062, Klebsiella aerogenes EA1509E	Biosynthesis.Carbohydrates-Biosynthesis.Alkanes-Biosynthesis.PWY-6622.
182	curcumin degradation	329/2434	0.5	0.5	Escherichia coli, Klebsiella	Escherichia coli PCN033, Escherichia coli O104:H4 TY-2482, Escherichia coli O104:H4 FWSEC0009, Escherichia coli O104:H4 LB226692, Escherichia coli O157 180-PT54, Escherichia coli O157 644-PT8, Escherichia coli O157 Al Ain, Escherichia coli O157 AR-0430, Escherichia coli O157 AR-0429, Escherichia coli O157 AR-0428, Escherichia coli O157 AR-0427, Escherichia coli O104:H4 str. C227-11, Escherichia c…
183	D-threonate degradation	18/2434	0.33	0.33	Escherichia coli, Klebsiella	Escherichia coli FHI_NMBU_03, Klebsiella michiganensis M1, Klebsiella michiganensis K516, Klebsiella michiganensis K518, Klebsiella michiganensis AR375, Klebsiella michiganensis M82255, Klebsiella michiganensis KNU07, Klebsiella michiganensis FDAARGOS_647, Klebsiella michiganensis C52, Klebsiella michiganensis HKOPL1, Klebsiella sp. LTGPAF-6F, Klebsiella oxytoca KONIH5, Klebsiella oxytoca AR_0028…	Degradation.CARBOXYLATES-DEG.PWY-7871.
184	trypanothione biosynthesis	11/2434	1.0	1	Escherichia coli, Klebsiella	Escherichia coli str. K-12 substr. DH10B, Escherichia coli BL21(DE3), Escherichia coli DH1, Escherichia coli O26:H11 str. 11368, Escherichia coli O103:H2 str. 12009, Escherichia coli O111:H- str. 11128, Escherichia coli BW2952, Escherichia coli ABU 83972, Escherichia coli 'BL21-Gold(DE3)pLysS AG', Escherichia coli O25b:H4-ST131 EC958, Klebsiella variicola At-22	Biosynthesis.Polyamine-Biosynthesis.TRYPANOSYN-PWY.
185	L-cysteine degradation III	47/2434	1.0	1	Escherichia coli, Klebsiella	Escherichia coli NA114, Escherichia coli O104:H4 TY-2482, Escherichia coli O104:H4 LB226692, Escherichia coli O157:H7 str. EDL933, Escherichia coli CFT073, Escherichia coli 042, Escherichia coli str. K-12 substr. DH10B, Escherichia coli str. K-12 substr. W3110, Escherichia coli O139:H28 str. E24377A, Escherichia coli HS, Escherichia coli B7A, Escherichia coli E22, Escherichia coli E110019, Escher…	Degradation.Amino-Acid-Degradation.Proteinogenic-Amino-Acids-Degradation.CYSTEINE-DEG.PWY-5329.
186	biphenyl degradation	14/2434	0.2	0.2	Escherichia coli, Klebsiella	Escherichia coli ETEC H10407, Escherichia coli DH1, Escherichia coli 'BL21-Gold(DE3)pLysS AG', Klebsiella aerogenes AR_0161, Klebsiella aerogenes FDAARGOS_327, Klebsiella aerogenes FDAARGOS_513, Klebsiella aerogenes NCTC9735, Klebsiella aerogenes FDAARGOS_152, Klebsiella aerogenes G7, Klebsiella aerogenes FDAARGOS_139, Klebsiella aerogenes AR_0007, Klebsiella aerogenes AR_0009, Klebsiella aerogen…	Degradation.AROMATIC-COMPOUNDS-DEGRADATION.PWY5F9-12.
187	guanosine nucleotides degradation II	13/2434	1.0	2.5	Escherichia coli, Klebsiella	Escherichia coli DH1, Escherichia coli 2015C-4136CT1, Escherichia coli RM14723, Klebsiella aerogenes AR_0161, Klebsiella aerogenes FDAARGOS_327, Klebsiella aerogenes FDAARGOS_513, Klebsiella aerogenes CAV1320, Klebsiella aerogenes FDAARGOS_152, Klebsiella aerogenes G7, Klebsiella aerogenes FDAARGOS_139, Klebsiella aerogenes AR_0009, Klebsiella aerogenes AR_0062, Klebsiella aerogenes EA1509E	Degradation.NUCLEO-DEG.Purine-Degradation.Guanosine-Nucleotides-Degradation.PWY-6606.
188	1,4-dihydroxy-2-naphthoate biosynthesis II (plants)	7/2434	1.0	1.29	Escherichia coli, Klebsiella	Escherichia coli O104:H4 LB226692, Escherichia coli BL21(DE3), Escherichia coli IAI1, Escherichia coli S88, Escherichia coli BW2952, Klebsiella pneumoniae JM45, Klebsiella pneumoniae subsp. pneumoniae MGH 78578	Biosynthesis.Cofactor-Biosynthesis.Quinone-Biosynthesis.DHNA-Biosynthesis.PWY-5791./Biosynthesis.SECONDARY-METABOLITE-BIOSYNTHESIS.PHENYLPROPANOID-SYN.QUINONE-SYN.PWY-5791.
189	3-phenylpropanoate and 3-(3-hydroxyphenyl)propanoate degradation to 2-hydroxypentadienoate	1055/2434	0.4	0.6	Escherichia coli, Klebsiella	Escherichia coli PCN033, Escherichia coli O104:H4 TY-2482, Escherichia coli O104:H4 FDAARGOS_348, Escherichia coli O104:H4 FDAARGOS_349, Escherichia coli O104:H4 FWSEC0009, Escherichia coli O104:H4 LB226692, Escherichia coli O157 180-PT54, Escherichia coli O157 644-PT8, Escherichia coli O157 FDAARGOS_293, Escherichia coli O157 Al Ain, Escherichia coli O157 AR-0430, Escherichia coli O157 AR-0429, …
190	tetrahydromonapterin biosynthesis	1414/2434	0.75	0.75	Escherichia coli, Klebsiella	Escherichia coli PCN033, Escherichia coli NA114, Escherichia coli O104:H4 TY-2482, Escherichia coli O104:H4 FDAARGOS_348, Escherichia coli O104:H4 FDAARGOS_349, Escherichia coli O104:H4 FWSEC0009, Escherichia coli O104:H4 LB226692, Escherichia coli O157 180-PT54, Escherichia coli O157 644-PT8, Escherichia coli O157 FDAARGOS_293, Escherichia coli O157 Al Ain, Escherichia coli O157 AR-0430, Escheri…
191	chlorinated phenols degradation	11/2434	1.0	1	Escherichia coli, Klebsiella	Escherichia coli 13C1065T, Escherichia coli E706, Escherichia coli ECCWS199, Escherichia coli CP53, Escherichia coli EC17GD31, Escherichia coli NCYU-29-69, Escherichia coli NCYU-25-82, Escherichia coli YPE10, Klebsiella quasipneumoniae TH114, Klebsiella pneumoniae LH94, Klebsiella pneumoniae TH164	Degradation.CHLORINATED-COMPOUNDS-DEG.Chloroaromatic-Compounds-Degradation.PWY-6197./Degradation.AROMATIC-COMPOUNDS-DEGRADATION.Chloroaromatic-Compounds-Degradation.PWY-6197.
192	trans-4-hydroxy-L-proline degradation II	4/2434	0.25	0.25	Escherichia coli, Klebsiella	Escherichia coli TW10598, Klebsiella sp. D5A, Klebsiella variicola At-22, Klebsiella pneumoniae CG43	Degradation.Amino-Acid-Degradation.MISCELLANEOUS-DEG.Hydroxyprolines-Degradation.PWY-5159.
193	sulfoquinovose degradation I	866/2434	0.6	0.6	Escherichia coli, Klebsiella	Escherichia coli PCN033, Escherichia coli O104:H4 FDAARGOS_348, Escherichia coli O104:H4 FDAARGOS_349, Escherichia coli O104:H4 FWSEC0009, Escherichia coli O157 180-PT54, Escherichia coli O157 644-PT8, Escherichia coli O157 FDAARGOS_293, Escherichia coli O157 Al Ain, Escherichia coli O157 AR-0430, Escherichia coli O157 AR-0429, Escherichia coli O157 AR-0428, Escherichia coli O157 AR-0427, Escheri…
194	glycine betaine biosynthesis III (plants)	9/2434	0.67	1.33	Escherichia coli, Klebsiella	Escherichia coli ETEC H10407, Klebsiella pneumoniae KCTC 2242, Klebsiella pneumoniae subsp. pneumoniae Kp13, Klebsiella pneumoniae subsp. pneumoniae HS11286, Klebsiella pneumoniae subsp. pneumoniae 1084, Klebsiella pneumoniae CG43, Klebsiella pneumoniae JM45, Klebsiella pneumoniae subsp. pneumoniae MGH 78578, Klebsiella pneumoniae subsp. pneumoniae NTUH-K2044	Biosynthesis.Polyamine-Biosynthesis.Betaine-Biosynthesis.PWY1F-353.
195	lactose degradation II	666/2434	0.33	0.33	Escherichia coli, Klebsiella, Morganella	Escherichia coli NA114, Escherichia coli O104:H4 TY-2482, Escherichia coli O104:H4 LB226692, Escherichia coli O157 Al Ain, Escherichia coli O157 AR-0430, Escherichia coli O157 AR-0429, Escherichia coli O157 AR-0428, Escherichia coli O157 AR-0427, Escherichia coli UMNF18, Escherichia coli O26 str. RM8426, Escherichia coli O43 str. RM10042, Escherichia coli str. K-12 substr. MDS42, Escherichia coli…
196	L-isoleucine biosynthesis III	270/2434	0.57	1.57	Escherichia coli, Klebsiella, Morganella	Escherichia coli PCN033, Escherichia coli O157 180-PT54, Escherichia coli O157 644-PT8, Escherichia coli O157 FDAARGOS_293, Escherichia coli O157 Al Ain, Escherichia coli O157 AR-0430, Escherichia coli O157 AR-0429, Escherichia coli O157 AR-0428, Escherichia coli O157 AR-0427, Escherichia coli O55:H7 str. RM12579, Escherichia coli O145 str. RM9872, Escherichia coli O7:K1 str. CE10, Escherichia co…
197	thiamine salvage I	1448/2434	1.0	1	Escherichia coli, Klebsiella, Morganella, Proteus	Escherichia coli PCN033, Escherichia coli NA114, Escherichia coli O104:H4 TY-2482, Escherichia coli O104:H4 FDAARGOS_348, Escherichia coli O104:H4 FDAARGOS_349, Escherichia coli O104:H4 FWSEC0009, Escherichia coli O104:H4 LB226692, Escherichia coli O157 180-PT54, Escherichia coli O157 644-PT8, Escherichia coli O157 FDAARGOS_293, Escherichia coli O157 Al Ain, Escherichia coli O157 AR-0430, Escheri…
198	hydrogen sulfide biosynthesis I	1088/2434	0.5	0.5	Escherichia coli, Klebsiella, Morganella, Proteus	Escherichia coli PCN033, Escherichia coli NA114, Escherichia coli O104:H4 TY-2482, Escherichia coli O104:H4 FWSEC0009, Escherichia coli O104:H4 LB226692, Escherichia coli O157 180-PT54, Escherichia coli O157 644-PT8, Escherichia coli O157 Al Ain, Escherichia coli O157 AR-0430, Escherichia coli O157 AR-0429, Escherichia coli O157 AR-0428, Escherichia coli O157 AR-0427, Escherichia coli O104:H4 str…
199	D-galactosamine and N-acetyl-D-galactosamine degradation	1166/2434	0.5	1.25	Escherichia coli, Klebsiella, Morganella, Proteus	Escherichia coli PCN033, Escherichia coli O104:H4 FDAARGOS_348, Escherichia coli O104:H4 FDAARGOS_349, Escherichia coli O104:H4 FWSEC0009, Escherichia coli O157 180-PT54, Escherichia coli O157 644-PT8, Escherichia coli O157 FDAARGOS_293, Escherichia coli O157 Al Ain, Escherichia coli O157 AR-0430, Escherichia coli O157 AR-0429, Escherichia coli O157 AR-0428, Escherichia coli O157 AR-0427, Escheri…
200	5-hexynoate biosynthesis	219/2434	0.33	0.33	Escherichia coli, Klebsiella, Morganella, Proteus	Escherichia coli O157 Al Ain, Escherichia coli O157 AR-0430, Escherichia coli O157 AR-0429, Escherichia coli O157 AR-0428, Escherichia coli O157 AR-0427, Escherichia coli O26 str. RM8426, Escherichia coli str. K-12 substr. MDS42, Escherichia coli str. K-12 substr. MDS42 MDS42 substr. SynA, Escherichia coli str. K-12 substr. MDS42 MDS42 substr. SynC, Escherichia coli str. K-12 substr. MDS42 SynAC …	Biosynthesis.Lipid-Biosynthesis.Fatty-acid-biosynthesis.Unsaturated-Fatty-Acids-Biosynthesis.Acetlylenic-Fatty-Acid-Biosynthesis.PWY-7641.
201	4-hydroxybenzoate biosynthesis II (bacteria)	404/2434	1.0	1	Escherichia coli, Klebsiella, Morganella, Proteus	Escherichia coli PCN033, Escherichia coli NA114, Escherichia coli O104:H4 TY-2482, Escherichia coli O104:H4 FWSEC0009, Escherichia coli O104:H4 LB226692, Escherichia coli O157 Al Ain, Escherichia coli O157 AR-0430, Escherichia coli O157 AR-0429, Escherichia coli O157 AR-0428, Escherichia coli O157 AR-0427, Escherichia coli UMNF18, Escherichia coli O26 str. RM8426, Escherichia coli O113:H21, Esche…
202	adenine and adenosine salvage V	1432/2434	1.0	1.33	Escherichia coli, Klebsiella, Morganella, Proteus	Escherichia coli PCN033, Escherichia coli NA114, Escherichia coli O104:H4 TY-2482, Escherichia coli O104:H4 FDAARGOS_348, Escherichia coli O104:H4 FDAARGOS_349, Escherichia coli O104:H4 FWSEC0009, Escherichia coli O104:H4 LB226692, Escherichia coli O157 180-PT54, Escherichia coli O157 644-PT8, Escherichia coli O157 FDAARGOS_293, Escherichia coli O157 Al Ain, Escherichia coli O157 AR-0430, Escheri…
203	5-(carboxymethoxy)uridine biosynthesis	1376/2434	0.5	0.5	Escherichia coli, Klebsiella, Morganella, Proteus	Escherichia coli PCN033, Escherichia coli O104:H4 FDAARGOS_348, Escherichia coli O104:H4 FDAARGOS_349, Escherichia coli O104:H4 FWSEC0009, Escherichia coli O157 180-PT54, Escherichia coli O157 644-PT8, Escherichia coli O157 FDAARGOS_293, Escherichia coli O157 Al Ain, Escherichia coli O157 AR-0430, Escherichia coli O157 AR-0429, Escherichia coli O157 AR-0428, Escherichia coli O157 AR-0427, Escheri…
204	dTDP-N-acetylthomosamine biosynthesis	1390/2434	1.0	1.25	Escherichia coli, Klebsiella, Morganella, Proteus	Escherichia coli PCN033, Escherichia coli O104:H4 FDAARGOS_348, Escherichia coli O104:H4 FDAARGOS_349, Escherichia coli O104:H4 FWSEC0009, Escherichia coli O157 180-PT54, Escherichia coli O157 644-PT8, Escherichia coli O157 FDAARGOS_293, Escherichia coli O157 Al Ain, Escherichia coli O157 AR-0430, Escherichia coli O157 AR-0429, Escherichia coli O157 AR-0428, Escherichia coli O157 AR-0427, Escheri…
205	fatty acid &beta;-oxidation III (unsaturated, odd number)	125/2434	1.0	1	Escherichia coli, Klebsiella, Morganella, Proteus	Escherichia coli O104:H4 str. 2011C-3493, Escherichia coli C11, Escherichia coli Ecol_276, Escherichia coli 13E0725, Escherichia coli 13E0780, Escherichia coli 2014C-4135, Escherichia coli 2013C-4830, Escherichia coli 2013C-3492, Escherichia coli 2014C-3061, Escherichia coli 88-3001, Escherichia coli 90-3040, Escherichia coli 95-3322, Escherichia coli RM14723, Escherichia coli RM14715, Escherichi…	Degradation.Fatty-Acid-and-Lipid-Degradation.Fatty-Acid-Degradation.PWY-5137.
206	guanine and guanosine salvage III	1453/2434	1.0	1	Escherichia coli, Klebsiella, Morganella, Proteus	Escherichia coli PCN033, Escherichia coli NA114, Escherichia coli O104:H4 TY-2482, Escherichia coli O104:H4 FDAARGOS_348, Escherichia coli O104:H4 FDAARGOS_349, Escherichia coli O104:H4 FWSEC0009, Escherichia coli O104:H4 LB226692, Escherichia coli O157 180-PT54, Escherichia coli O157 644-PT8, Escherichia coli O157 FDAARGOS_293, Escherichia coli O157 Al Ain, Escherichia coli O157 AR-0430, Escheri…
207	L-carnitine degradation I	970/2434	1.0	1	Escherichia coli, Klebsiella, Proteus	Escherichia coli PCN033, Escherichia coli NA114, Escherichia coli O104:H4 TY-2482, Escherichia coli O104:H4 FDAARGOS_348, Escherichia coli O104:H4 FDAARGOS_349, Escherichia coli O104:H4 FWSEC0009, Escherichia coli O104:H4 LB226692, Escherichia coli O157 180-PT54, Escherichia coli O157 644-PT8, Escherichia coli O157 FDAARGOS_293, Escherichia coli O157 Al Ain, Escherichia coli O157 AR-0430, Escheri…
208	pyruvate fermentation to propanoate II (acrylate pathway)	1/2434	0.4	0.6	Fusobacterium	Fusobacterium necrophorum subsp. funduliforme ATCC 51357	Energy-Metabolism.Fermentation.Pyruvate-Degradation.Pyruvate-Propanoate-Fermentation.PWY-5494./Energy-Metabolism.Fermentation.Fermentation-to-Acids.Fermentation-to-propanoate.Pyruvate-Propanoate-Fermentation.PWY-5494.
209	nucleobase derivative transport	1/2434	0.14	0.29	Fusobacterium	Fusobacterium sp. CAG:649	Transport-PWY-6229
210	sulfolactate degradation I	3/2434	0.25	0.25	Fusobacterium, Bilophila wadsworthia	Fusobacterium mortiferum ATCC 9817, Fusobacterium ulcerans ATCC 49185, Bilophila wadsworthia 3_1_6	Degradation.Noncarbon-Nutrients.Sulfur-Metabolism.Sulfolactate-Degradation.PWY-6616.
211	L-dopa and L-dopachrome biosynthesis	5/2434	0.33	0.33	Fusobacterium, Delftia, Desulfovibrio, Fusobacterium nucleatum, Parabacteroides	Fusobacterium nucleatum subsp. fusiforme ATCC 51190, Fusobacterium nucleatum subsp. fusiforme ATCC 51190, Delftia acidovorans SPH-1, Desulfovibrio brasiliensis JCM 12178, Parabacteroides distasonis CL03T12C09, Parabacteroides distasonis CL09T03C24	Biosynthesis.Other-biosynthesis.PWY-6481.
212	o-diquinones biosynthesis	5/2434	1.0	1	Fusobacterium, Delftia, Desulfovibrio, Fusobacterium nucleatum, Parabacteroides	Fusobacterium nucleatum subsp. fusiforme ATCC 51190, Fusobacterium nucleatum subsp. fusiforme ATCC 51190, Delftia acidovorans SPH-1, Desulfovibrio brasiliensis JCM 12178, Parabacteroides distasonis CL03T12C09, Parabacteroides distasonis CL09T03C24	Biosynthesis.AROMATIC-COMPOUNDS-BIOSYN.PWY-6752.
213	adenosylcobinamide-GDP biosynthesis from cobyrinate a,c-diamide	7/2434	0.83	1.33	Fusobacterium, Delftia, Klebsiella, Selenomonas	Klebsiella pneumoniae AR_0117, Selenomonas ruminantium subsp. lactilytica TAM6421, Fusobacterium necrophorum subsp. funduliforme F1291, Fusobacterium necrophorum subsp. funduliforme F1260, Fusobacterium necrophorum subsp. necrophorum, Fusobacterium necrophorum FDAARGOS_565, Delftia tsuruhatensis CM13	Biosynthesis.Cofactor-Biosynthesis.Vitamin-Biosynthesis.Cobalamin-Biosynthesis.Cobamide-De-Novo-Biosynthesis.PWY-7962.
214	D-serine metabolism	2/2434	1.0	1	Fusobacterium, Fusobacterium nucleatum	Fusobacterium sp. CAG:649, Fusobacterium nucleatum subsp. nucleatum ATCC 25586, Fusobacterium nucleatum subsp. nucleatum ATCC 25586	Degradation.Amino-Acid-Degradation.MISCELLANEOUS-DEG.D-Amino-Acid-Degradation.PWY-6196./Super-PWY-6196./Biosynthesis.Amino-Acid-Biosynthesis.Other-Amino-Acid-Biosynthesis.PWY-6196.
215	ectoine biosynthesis	18/2434	0.6	1.4	Fusobacterium, Klebsiella	Klebsiella michiganensis KCTC 1686, Klebsiella sp. D5A, Klebsiella variicola At-22, Klebsiella pneumoniae JH1, Klebsiella pneumoniae 1162281, Klebsiella pneumoniae KCTC 2242, Klebsiella pneumoniae subsp. pneumoniae Kp13, Klebsiella pneumoniae subsp. pneumoniae HS11286, Klebsiella pneumoniae subsp. pneumoniae DSM 30104, Klebsiella pneumoniae subsp. pneumoniae 1084, Klebsiella pneumoniae CG43, Kleb…	Biosynthesis.Polyamine-Biosynthesis.P101-PWY.
216	sulfoacetaldehyde degradation III	10/2434	1.0	1	Fusobacterium, Lactobacillus, Klebsiella	Lactobacillus brevis SRCM101174, Klebsiella sp. D5A, Klebsiella oxytoca JKo3, Klebsiella oxytoca CAV1374, Klebsiella pneumoniae JH1, Klebsiella pneumoniae 1162281, Klebsiella pneumoniae subsp. pneumoniae DSM 30104, Klebsiella pneumoniae KP-1, Fusobacterium nucleatum ChDC F128, Fusobacterium russii ATCC 25533 593A	Degradation.Noncarbon-Nutrients.Sulfur-Metabolism.Sulfoacetaldehyde-Degradation.PWY-6718.
217	sophorosyloxydocosanoate deacetylation	3/2434	1.0	1	Fusobacterium, Lactobacillus, Klebsiella	Lactobacillus acidipiscis KCTC 13900, Klebsiella pneumoniae 342, Fusobacterium mortiferum ATCC 9817	Degradation.Fatty-Acid-and-Lipid-Degradation.SOPHOROSYLOXYDOCOSANOATE-DEG-PWY.
218	mevalonate pathway I	161/2434	0.86	1	Fusobacterium, Megasphaera, Lactobacillus, Lactococcus, Enterococcus	Megasphaera hexanoica MH, Lactobacillus jensenii 115-3-CHN, Lactobacillus iners DSM 13335, Lactobacillus acidophilus NCFM, Lactobacillus brevis KB290, Lactobacillus brevis BSO 464, Lactobacillus brevis EW, Lactobacillus brevis AG48, Lactobacillus brevis NPS-QW-145, Lactobacillus brevis TMW 1.2113, Lactobacillus brevis TMW 1.2108, Lactobacillus brevis TMW 1.2111, Lactobacillus brevis 100D8, Lactob…	Biosynthesis.SECONDARY-METABOLITE-BIOSYNTHESIS.Terpenoid-Biosynthesis.ISOPRENOIDS.Isopentenyl-Diphosphate-Biosynthesis.Mevalonate-PWY-922.
219	lactate biosynthesis (archaea)	1/2434	0.6	1.2	Klebsiella	Klebsiella michiganensis E718	Energy-Metabolism.PWY-5197.
220	L-lysine degradation VI	21/2434	0.33	0.33	Klebsiella	Klebsiella pneumoniae KCTC 2242, Klebsiella pneumoniae subsp. pneumoniae DSM 30104, Klebsiella pneumoniae CG43, Klebsiella pneumoniae subsp. pneumoniae 1158, Klebsiella pneumoniae HK787, Klebsiella pneumoniae KSB1_7E, Klebsiella pneumoniae KSB2_1B, Klebsiella pneumoniae KSB1_10J, Klebsiella pneumoniae KSB1_4E, Klebsiella pneumoniae NUHL30457, Klebsiella pneumoniae cr-hvkp3, Klebsiella pneumoniae …	Degradation.Amino-Acid-Degradation.Proteinogenic-Amino-Acids-Degradation.LYSINE-DEG.PWY-5298.
221	aminopropanol phosphate biosynthesis I	180/2434	1.0	1	Klebsiella	Klebsiella michiganensis AR375, Klebsiella michiganensis M82255, Klebsiella michiganensis KNU07, Klebsiella michiganensis FDAARGOS_647, Klebsiella michiganensis C52, Klebsiella michiganensis HKOPL1, Klebsiella sp. D5A, Klebsiella quasipneumoniae D120-1, Klebsiella quasipneumoniae A708, Klebsiella quasipneumoniae SNI47, Klebsiella quasipneumoniae TH114, Klebsiella quasipneumoniae KP18-31, Klebsiel…	Biosynthesis.Cofactor-Biosynthesis.Vitamin-Biosynthesis.Cobalamin-Biosynthesis.Cobamide-De-Novo-Biosynthesis.Aminopropanol-Phosphate-Biosynthesis.PWY-5443.
222	toluene degradation to 2-hydroxypentadienoate I (via o-cresol)	7/2434	0.25	0.25	Klebsiella	Klebsiella variicola At-22, Klebsiella pneumoniae JH1, Klebsiella pneumoniae subsp. pneumoniae Kp13, Klebsiella pneumoniae subsp. pneumoniae HS11286, Klebsiella pneumoniae CG43, Klebsiella pneumoniae JM45, Klebsiella pneumoniae subsp. pneumoniae MGH 78578	Degradation.AROMATIC-COMPOUNDS-DEGRADATION.TOLUENE-DEG.TOLUENE-DEG-2-OH-PWY.
223	2-chlorobenzoate degradation	10/2434	1.0	1	Klebsiella	Klebsiella sp. D5A, Klebsiella pneumoniae 1162281, Klebsiella pneumoniae KCTC 2242, Klebsiella pneumoniae subsp. pneumoniae Kp13, Klebsiella pneumoniae subsp. pneumoniae HS11286, Klebsiella pneumoniae subsp. pneumoniae 1084, Klebsiella pneumoniae CG43, Klebsiella pneumoniae JM45, Klebsiella pneumoniae subsp. pneumoniae MGH 78578, Klebsiella pneumoniae 342	Degradation.CHLORINATED-COMPOUNDS-DEG.Chloroaromatic-Compounds-Degradation.Chlorobenzoate-Degradation.PWY-6221./Degradation.AROMATIC-COMPOUNDS-DEGRADATION.Chloroaromatic-Compounds-Degradation.Chlorobenzoate-Degradation.PWY-6221.
224	methylthiopropanoate degradation I (cleavage)	2/2434	0.33	0.33	Klebsiella	Klebsiella pneumoniae JH1, Klebsiella pneumoniae 1162281	Degradation.Noncarbon-Nutrients.Sulfur-Metabolism.Methylthiopropionate-Degradation.PWY-6048.
225	isopenicillin N biosynthesis	13/2434	0.5	0.5	Klebsiella	Klebsiella michiganensis KCTC 1686, Klebsiella michiganensis E718, Klebsiella variicola At-22, Klebsiella pneumoniae KCTC 2242, Klebsiella pneumoniae subsp. pneumoniae Kp13, Klebsiella pneumoniae subsp. pneumoniae 1084, Klebsiella pneumoniae CG43, Klebsiella pneumoniae JM45, Klebsiella pneumoniae 30660/NJST258_1, Klebsiella pneumoniae 30684/NJST258_2, Klebsiella pneumoniae subsp. pneumoniae MGH 7…	Biosynthesis.SECONDARY-METABOLITE-BIOSYNTHESIS.Antibiotic-Biosynthesis.PWY-5629.
226	toluene degradation to 2-hydroxypentadienoate (via 4-methylcatechol)	1/2434	0.25	0.25	Klebsiella	Klebsiella pneumoniae JH1	Degradation.AROMATIC-COMPOUNDS-DEGRADATION.TOLUENE-DEG.TOLUENE-DEG-3-OH-PWY.
227	L-cysteine degradation I	2/2434	0.67	1	Klebsiella	Klebsiella michiganensis E718, Klebsiella pneumoniae subsp. pneumoniae 1084	Degradation.Amino-Acid-Degradation.Proteinogenic-Amino-Acids-Degradation.CYSTEINE-DEG.CYSTEINE-DEG-PWY.
228	methanesulfonate degradation	4/2434	1.0	1	Klebsiella	Klebsiella sp. D5A, Klebsiella pneumoniae JH1, Klebsiella pneumoniae subsp. pneumoniae Kp13, Klebsiella pneumoniae subsp. pneumoniae DSM 30104	Degradation.Noncarbon-Nutrients.Sulfur-Metabolism.PWY-6044.
229	ectoine degradation	7/2434	0.5	0.5	Klebsiella	Klebsiella quasipneumoniae SNI47, Klebsiella sp. PO552, Klebsiella aerogenes NCTC9652, Klebsiella pneumoniae J1, Klebsiella pneumoniae KSB1_7F-sc-2280268, Klebsiella pneumoniae LH94, Klebsiella pneumoniae AR_0139	Degradation.AMINE-DEG.PWY-7855.
230	pyrroloquinoline quinone biosynthesis	83/2434	0.14	0.14	Klebsiella	Klebsiella quasipneumoniae A708, Klebsiella quasipneumoniae SNI47, Klebsiella quasipneumoniae TH114, Klebsiella quasipneumoniae KP18-31, Klebsiella quasipneumoniae subsp. quasipneumoniae M17277, Klebsiella variicola WCHKV030666, Klebsiella variicola FDAARGOS_627, Klebsiella variicola WCHKP19, Klebsiella aerogenes LU2, Klebsiella aerogenes Ka37751, Klebsiella aerogenes FDAARGOS_641, Klebsiella aer…	Biosynthesis.Cofactor-Biosynthesis.PWY-6420.
231	catechol degradation to 2-hydroxypentadienoate I	4/2434	0.5	0.5	Klebsiella	Klebsiella pneumoniae JH1, Klebsiella pneumoniae subsp. pneumoniae Kp13, Klebsiella pneumoniae 30660/NJST258_1, Klebsiella pneumoniae 30684/NJST258_2	Degradation.AROMATIC-COMPOUNDS-DEGRADATION.Catechol-Degradation.P183-PWY.
232	NAD biosynthesis III (from nicotinamide)	2/2434	0.75	0.75	Klebsiella	Klebsiella michiganensis KCTC 1686, Klebsiella michiganensis E718	Biosynthesis.Cofactor-Biosynthesis.NAD-Metabolism.NAD-SYN.NAD-BIOSYNTHESIS-III.
233	UTP and CTP dephosphorylation II	1/2434	1.0	1	Klebsiella	Klebsiella aerogenes KCTC 2190	Degradation.NUCLEO-DEG.Pyrimidine-Degradation.Pyrimidine-Ribonucleosides-Degradation.UTP-CTP-Dephosphorylation.PWY-7177.
234	menaquinol-13 biosynthesis	2/2434	1.0	1	Klebsiella	Klebsiella pneumoniae 30660/NJST258_1, Klebsiella pneumoniae 30684/NJST258_2	Biosynthesis.Cofactor-Biosynthesis.Quinone-Biosynthesis.Menaquinone-Biosynthesis.PWY-5895.
235	gallate degradation II	14/2434	0.2	0.4	Klebsiella	Klebsiella michiganensis KCTC 1686, Klebsiella michiganensis E718, Klebsiella variicola At-22, Klebsiella pneumoniae KCTC 2242, Klebsiella pneumoniae subsp. pneumoniae Kp13, Klebsiella pneumoniae subsp. pneumoniae HS11286, Klebsiella pneumoniae subsp. pneumoniae 1084, Klebsiella pneumoniae CG43, Klebsiella pneumoniae JM45, Klebsiella pneumoniae 30660/NJST258_1, Klebsiella pneumoniae 30684/NJST258…	Degradation.AROMATIC-COMPOUNDS-DEGRADATION.GALLATE-DEG.GALLATE-DEGRADATION-I-PWY.
236	mandelate degradation I	1/2434	0.2	0.2	Klebsiella	Klebsiella sp. D5A	Degradation.AROMATIC-COMPOUNDS-DEGRADATION.MANDELATE-DEG.PWY-1501.
237	gallate degradation I	264/2434	1.0	1	Klebsiella	Klebsiella sp. D5A, Klebsiella quasipneumoniae subsp. similipneumoniae G747, Klebsiella quasipneumoniae subsp. similipneumoniae ATCC 700603, Klebsiella quasipneumoniae CAV1947, Klebsiella quasipneumoniae L22, Klebsiella quasipneumoniae D120-1, Klebsiella quasipneumoniae A708, Klebsiella quasipneumoniae TH114, Klebsiella quasipneumoniae KP18-31, Klebsiella quasipneumoniae HKUOPLA, Klebsiella quasi…	Degradation.AROMATIC-COMPOUNDS-DEGRADATION.GALLATE-DEG.GALLATE-DEGRADATION-II-PWY.
238	urate conversion to allantoin II	406/2434	1.0	1.33	Klebsiella	Klebsiella michiganensis AR375, Klebsiella michiganensis M82255, Klebsiella michiganensis KNU07, Klebsiella michiganensis FDAARGOS_647, Klebsiella michiganensis C52, Klebsiella quasipneumoniae subsp. similipneumoniae G747, Klebsiella quasipneumoniae subsp. similipneumoniae ATCC 700603, Klebsiella quasipneumoniae CAV1947, Klebsiella quasipneumoniae L22, Klebsiella quasipneumoniae D120-1, Klebsiell…	Degradation.AROMATIC-COMPOUNDS-DEGRADATION.Urate-Degradation.PWY-7394.
239	taurine degradation III	2/2434	1.0	1	Klebsiella	Klebsiella sp. D5A, Klebsiella pneumoniae 30660/NJST258_1	Degradation.Noncarbon-Nutrients.Sulfur-Metabolism.Taurine-degradation.TAURINEDEG-PWY./Degradation.Noncarbon-Nutrients.NITROGEN-DEG.Taurine-degradation.TAURINEDEG-PWY.
240	rhizobactin 1021 biosynthesis	18/2434	0.33	0.33	Klebsiella	Klebsiella michiganensis KCTC 1686, Klebsiella michiganensis E718, Klebsiella sp. D5A, Klebsiella variicola At-22, Klebsiella pneumoniae JH1, Klebsiella pneumoniae 1162281, Klebsiella pneumoniae KCTC 2242, Klebsiella pneumoniae subsp. pneumoniae Kp13, Klebsiella pneumoniae subsp. pneumoniae HS11286, Klebsiella pneumoniae subsp. pneumoniae DSM 30104, Klebsiella pneumoniae subsp. pneumoniae 1084, K…	Biosynthesis.SECONDARY-METABOLITE-BIOSYNTHESIS.Siderophores-Biosynthesis.PWY-761.
241	D-arabinose degradation II	4/2434	0.67	1	Klebsiella	Klebsiella michiganensis E718, Klebsiella pneumoniae subsp. pneumoniae 1084, Klebsiella pneumoniae 30660/NJST258_1, Klebsiella pneumoniae 30684/NJST258_2	Degradation.Carbohydrates-Degradation.Sugars-And-Polysaccharides-Degradation.D-Arabinose-Degradation.DARABCAT-PWY.
242	menaquinol-12 biosynthesis	2/2434	1.0	1	Klebsiella	Klebsiella pneumoniae 30660/NJST258_1, Klebsiella pneumoniae 30684/NJST258_2	Biosynthesis.Cofactor-Biosynthesis.Quinone-Biosynthesis.Menaquinone-Biosynthesis.PWY-5892.
243	vanillin and vanillate degradation I	1/2434	0.5	0.5	Klebsiella	Klebsiella aerogenes KCTC 2190	Degradation.AROMATIC-COMPOUNDS-DEGRADATION.Vanillin-Degradation.PWY-7097.
244	bacterial bioluminescence	14/2434	0.38	0.62	Klebsiella	Klebsiella aerogenes KCTC 2190, Klebsiella aerogenes AR_0161, Klebsiella aerogenes FDAARGOS_327, Klebsiella aerogenes FDAARGOS_513, Klebsiella aerogenes LU2, Klebsiella aerogenes FDAARGOS_152, Klebsiella aerogenes G7, Klebsiella aerogenes FDAARGOS_139, Klebsiella aerogenes FDAARGOS_363, Klebsiella aerogenes AR_0018, Klebsiella aerogenes AR_0007, Klebsiella aerogenes AR_0009, Klebsiella aerogenes …	Bioluminescence.PWY-7723.
245	dimethyl sulfide degradation II (oxidation)	17/2434	0.2	0.2	Klebsiella	Klebsiella variicola WCHKV030666, Klebsiella variicola E57-7, Klebsiella variicola X39, Klebsiella variicola 15WZ-82, Klebsiella variicola FDAARGOS_627, Klebsiella variicola AJ292, Klebsiella variicola 03-311-0071, Klebsiella variicola 13450, Klebsiella variicola 342, Klebsiella variicola DX120E, Klebsiella variicola DSM 15968, Klebsiella variicola LMG 23571, Klebsiella variicola GJ1, Klebsiella …	Degradation.Noncarbon-Nutrients.Sulfur-Metabolism.Dimethylsulfide-Degradation.PWY-6059.
246	catechol degradation to 2-hydroxypentadienoate II	6/2434	0.5	0.62	Klebsiella	Klebsiella variicola At-22, Klebsiella pneumoniae subsp. pneumoniae Kp13, Klebsiella pneumoniae subsp. pneumoniae HS11286, Klebsiella pneumoniae CG43, Klebsiella pneumoniae JM45, Klebsiella pneumoniae subsp. pneumoniae MGH 78578	Degradation.AROMATIC-COMPOUNDS-DEGRADATION.Catechol-Degradation.PWY-5419.
247	oxalate degradation V	2/2434	1.0	1	Klebsiella, Enterococcus	Klebsiella michiganensis RC10, Enterococcus gilvus ATCC BAA-350	Degradation.CARBOXYLATES-DEG.Oxalate-Degradation.PWY-6698.
248	dTDP-L-olivose biosynthesis	22/2434	0.17	0.17	Lactobacillus	Lactobacillus brevis TMW 1.2113, Lactobacillus brevis TMW 1.2108, Lactobacillus brevis TMW 1.2111, Lactobacillus brevis 100D8, Lactobacillus brevis SRCM101174, Lactobacillus brevis SRCM101106, Lactobacillus brevis subsp. gravesensis ATCC 27305, Lactobacillus plantarum ZJ316, Lactobacillus plantarum WJL, Lactobacillus plantarum EGD-AQ4, Lactobacillus plantarum subsp. plantarum ST-III, Lactobacillu…	Biosynthesis.Carbohydrates-Biosynthesis.CARBO-BIOSYNTHESIS.SUGAR-NUCLEOTIDES.dTDP-Sugar-Biosynthesis.PWY-6974.
249	Ac/N-end rule pathway	1/2434	1.0	1	Lactobacillus	Lactobacillus buchneri CD034	Macromolecule-Modification.Protein-Modification.PWY-7800./Metabolic-Clusters.PWY-7800.
250	L-phenylalanine degradation VI (Stickland reaction)	1/2434	0.2	0.2	Lactobacillus	Lactobacillus kullabergensis ESL0186	Degradation.Amino-Acid-Degradation.Proteinogenic-Amino-Acids-Degradation.PHENYLALANINE-DEG.PWY-8014.
251	2,4-dichlorotoluene degradation	6/2434	0.22	0.22	Lactobacillus	Lactobacillus delbrueckii subsp. bulgaricus DSM 20080, Lactobacillus delbrueckii subsp. bulgaricus L99, Lactobacillus delbrueckii subsp. bulgaricus KLDS1.0207, Lactobacillus delbrueckii subsp. bulgaricus KLDS1.1011, Lactobacillus delbrueckii subsp. bulgaricus, Lactobacillus delbrueckii subsp. bulgaricus 2038	Degradation.CHLORINATED-COMPOUNDS-DEG.Chloroaromatic-Compounds-Degradation.Chlorotoluene-Degradation.Dichlorotoluene-Degradation.PWY-6190./Degradation.AROMATIC-COMPOUNDS-DEGRADATION.Chloroaromatic-Compounds-Degradation.Chlorotoluene-Degradation.Dichlorotoluene-Degradation.PWY-6190.
252	dTDP-D-olivose, dTDP-D-oliose and dTDP-D-mycarose biosynthesis	22/2434	0.12	0.12	Lactobacillus	Lactobacillus brevis TMW 1.2113, Lactobacillus brevis TMW 1.2108, Lactobacillus brevis TMW 1.2111, Lactobacillus brevis 100D8, Lactobacillus brevis SRCM101174, Lactobacillus brevis SRCM101106, Lactobacillus brevis subsp. gravesensis ATCC 27305, Lactobacillus plantarum ZJ316, Lactobacillus plantarum WJL, Lactobacillus plantarum EGD-AQ4, Lactobacillus plantarum subsp. plantarum ST-III, Lactobacillu…	Biosynthesis.Carbohydrates-Biosynthesis.CARBO-BIOSYNTHESIS.SUGAR-NUCLEOTIDES.dTDP-Sugar-Biosynthesis.PWY-6973.
253	5-chloro-3-methyl-catechol degradation	6/2434	0.25	0.25	Lactobacillus	Lactobacillus delbrueckii subsp. bulgaricus DSM 20080, Lactobacillus delbrueckii subsp. bulgaricus L99, Lactobacillus delbrueckii subsp. bulgaricus KLDS1.0207, Lactobacillus delbrueckii subsp. bulgaricus KLDS1.1011, Lactobacillus delbrueckii subsp. bulgaricus, Lactobacillus delbrueckii subsp. bulgaricus 2038	Degradation.CHLORINATED-COMPOUNDS-DEG.Chloroaromatic-Compounds-Degradation.PWY-6102./Degradation.AROMATIC-COMPOUNDS-DEGRADATION.Chloroaromatic-Compounds-Degradation.PWY-6102.
254	L-leucine degradation IV (Stickland reaction)	32/2434	0.4	0.4	Lactobacillus	Lactobacillus jensenii SNUV360, Lactobacillus hokkaidonensis JCM 18461, Lactobacillus kullabergensis ESL0186, Lactobacillus casei W56, Lactobacillus delbrueckii subsp. bulgaricus MN-BM-F01, Lactobacillus delbrueckii subsp. bulgaricus ND04, Lactobacillus delbrueckii subsp. indicus, Lactobacillus paracasei N1115, Lactobacillus paracasei FAM18149, Lactobacillus paracasei HD1.7, Lactobacillus paracas…	Degradation.Amino-Acid-Degradation.Proteinogenic-Amino-Acids-Degradation.LEUCINE-DEG.PWY-7767.
255	gallate biosynthesis	2/2434	0.33	0.33	Lactobacillus	Lactobacillus iners DSM 13335, Lactobacillus gasseri 224-1	Biosynthesis.AROMATIC-COMPOUNDS-BIOSYN.PWY-6707.
256	4-chloronitrobenzene degradation	11/2434	0.22	0.22	Lactobacillus	Lactobacillus frumenti LF145, Lactobacillus nenjiangensis SH-Y15, Lactobacillus buchneri MGB0786, Lactobacillus plantarum IRG1, Lactobacillus plantarum subsp. plantarum TS12, Lactobacillus reuteri YSJL-12, Lactobacillus reuteri LL7, Lactobacillus fermentum 2760, Lactobacillus fermentum DR9, Lactobacillus sp. BHWM-4, Lactobacillus hordei TMW 1.1822	Degradation.AROMATIC-COMPOUNDS-DEGRADATION.Nitroaromatic-Degradation.Nitrobenzene-Degradation.PWY-5645.
257	octopine degradation	2/2434	1.0	1	Lactobacillus	Lactobacillus casei BL23, Lactobacillus rhamnosus GG GG (ATCC 53103)	Degradation.SECONDARY-METABOLITE-DEGRADATION.N-CONTAINING-SECONDARY-CMPD-DEG.OCTOPINEDEG-PWY.
258	perchlorate reduction	1/2434	0.5	0.5	Lactobacillus	Lactobacillus plantarum UCMA 3037	Energy-Metabolism.Respiration.ANAEROBIC-RESPIRATION.PWY-6530.
259	dTDP-L-mycarose biosynthesis	22/2434	0.14	0.14	Lactobacillus	Lactobacillus brevis TMW 1.2113, Lactobacillus brevis TMW 1.2108, Lactobacillus brevis TMW 1.2111, Lactobacillus brevis 100D8, Lactobacillus brevis SRCM101174, Lactobacillus brevis SRCM101106, Lactobacillus brevis subsp. gravesensis ATCC 27305, Lactobacillus plantarum ZJ316, Lactobacillus plantarum WJL, Lactobacillus plantarum EGD-AQ4, Lactobacillus plantarum subsp. plantarum ST-III, Lactobacillu…	Biosynthesis.Carbohydrates-Biosynthesis.CARBO-BIOSYNTHESIS.SUGAR-NUCLEOTIDES.dTDP-Sugar-Biosynthesis.PWY-6976.
260	chlorate reduction	1/2434	0.5	0.5	Lactobacillus	Lactobacillus plantarum UCMA 3037	Energy-Metabolism.Respiration.ANAEROBIC-RESPIRATION.PWY-6529.
261	salicylate degradation III	5/2434	1.0	1	Lactobacillus	Lactobacillus brevis ATCC 14869 = DSM 20054, Lactobacillus rhamnosus ATCC 21052, Lactobacillus rhamnosus CASL, Lactobacillus rhamnosus LMS2-1, Lactobacillus rhamnosus R0011	Degradation.AROMATIC-COMPOUNDS-DEGRADATION.Salicylate-Degradation.PWY-6636.
262	glyphosate degradation II	26/2434	1.0	1	Lactobacillus	Lactobacillus plantarum KP, Lactobacillus plantarum DF, Lactobacillus plantarum LP2, Lactobacillus plantarum BLS41, Lactobacillus plantarum TMW 1.708, Lactobacillus plantarum dm, Lactobacillus plantarum BDGP2, Lactobacillus plantarum PC520, Lactobacillus plantarum K259, Lactobacillus plantarum LM1004, Lactobacillus plantarum KC28, Lactobacillus plantarum, Lactobacillus plantarum SK151, Lactobacil…	Degradation.Noncarbon-Nutrients.Phosphorus-Compounds.Glyphosate-Degradation.PWY-7806.
263	nitric oxide biosynthesis I (plants)	24/2434	1.0	1	Lactobacillus, Enterococcus	Lactobacillus brevis BSO 464, Lactobacillus brevis NPS-QW-145, Lactobacillus brevis TMW 1.2113, Lactobacillus brevis TMW 1.2108, Lactobacillus brevis TMW 1.2111, Lactobacillus brevis 100D8, Lactobacillus brevis BDGP6, Lactobacillus brevis ATCC 367, Lactobacillus helveticus H10, Lactobacillus helveticus R0052, Lactobacillus sakei WiKim0063, Lactobacillus sakei DS4, Lactobacillus sakei WiKim0072, L…	Biosynthesis.Metabolic-Regulators.Nitric-Oxide-Biosynthesis.PWY-6845.
264	4,4'-diapolycopenedioate biosynthesis	19/2434	0.44	0.44	Lactobacillus, Enterococcus	Lactobacillus plantarum subsp. plantarum NC8, Lactobacillus plantarum UCMA 3037, Lactobacillus plantarum ZJ316, Lactobacillus plantarum 16, Lactobacillus plantarum IPLA88, Lactobacillus plantarum WJL, Lactobacillus plantarum AY01, Lactobacillus plantarum 4_3, Lactobacillus plantarum 2165, Lactobacillus plantarum 2025, Lactobacillus plantarum B21, Lactobacillus plantarum WCFS1, Lactobacillus plant…	Biosynthesis.SECONDARY-METABOLITE-BIOSYNTHESIS.Terpenoid-Biosynthesis.CAROTENOID-SYN.C30-Carotenoids-Biosynthesis.PWY-6767./Biosynthesis.SECONDARY-METABOLITE-BIOSYNTHESIS.Terpenoid-Biosynthesis.TRITERPENOID-SYN.C30-Carotenoids-Biosynthesis.PWY-6767./Biosynthesis.SECONDARY-METABOLITE-BIOSYNTHESIS.Terpenoid-Biosynthesis.TRITERPENOID-SYN.PWY-6767.
265	staphyloxanthin biosynthesis	2/2434	0.33	0.33	Lactobacillus, Enterococcus	Lactobacillus plantarum subsp. plantarum P-8, Enterococcus mundtii CRL35	Biosynthesis.SECONDARY-METABOLITE-BIOSYNTHESIS.Terpenoid-Biosynthesis.CAROTENOID-SYN.C30-Carotenoids-Biosynthesis.PWY-5875./Biosynthesis.SECONDARY-METABOLITE-BIOSYNTHESIS.Terpenoid-Biosynthesis.TRITERPENOID-SYN.C30-Carotenoids-Biosynthesis.PWY-5875./Biosynthesis.SECONDARY-METABOLITE-BIOSYNTHESIS.Terpenoid-Biosynthesis.TRITERPENOID-SYN.PWY-5875.
266	oxalate degradation III	36/2434	0.4	0.8	Lactobacillus, Escherichia coli	Lactobacillus reuteri SD2112, Lactobacillus reuteri CF48-3A, Escherichia coli NA114, Escherichia coli O104:H4 TY-2482, Escherichia coli O104:H4 LB226692, Escherichia coli UMNF18, Escherichia coli J96, Escherichia coli ATCC 25922, Escherichia coli JJ1886, Escherichia coli O157:H7 str. EDL933, Escherichia coli CFT073, Escherichia coli 042, Escherichia coli ETEC H10407, Escherichia coli str. K-12 su…	Degradation.CARBOXYLATES-DEG.Oxalate-Degradation.PWY-6696.
267	mannosylglycerate biosynthesis I	906/2434	0.5	0.5	Lactobacillus, Escherichia coli	Lactobacillus curvatus MRS6, Escherichia coli PCN033, Escherichia coli NA114, Escherichia coli O104:H4 TY-2482, Escherichia coli O104:H4 FDAARGOS_348, Escherichia coli O104:H4 FDAARGOS_349, Escherichia coli O104:H4 FWSEC0009, Escherichia coli O104:H4 LB226692, Escherichia coli O157 180-PT54, Escherichia coli O157 644-PT8, Escherichia coli O157 FDAARGOS_293, Escherichia coli O157 Al Ain, Escherich…
268	pyrimidine ribonucleosides salvage III	231/2434	1.0	1	Lactobacillus, Escherichia coli, Klebsiella	Lactobacillus brevis UCCLBBS124, Lactobacillus brevis SA-C12, Lactobacillus brevis UCCLB556, Lactobacillus brevis UCCLB95, Lactobacillus brevis UCCLBBS449, Lactobacillus brevis UCCLB521, Lactobacillus reuteri, Lactobacillus reuteri WHH1689, Lactobacillus reuteri YSJL-12, Lactobacillus reuteri LL7, Lactobacillus animalis LL1, Lactobacillus coryniformis CBA3616, Lactobacillus fermentum 2760, Lactob…
269	benzoyl-CoA biosynthesis	37/2434	0.33	0.33	Lactobacillus, Escherichia coli, Klebsiella, Lactococcus	Lactobacillus brevis BSO 464, Lactobacillus brevis NPS-QW-145, Lactobacillus brevis TMW 1.2113, Lactobacillus brevis TMW 1.2108, Lactobacillus brevis TMW 1.2111, Lactobacillus brevis 100D8, Lactobacillus sakei WiKim0063, Lactobacillus sakei FAM18311, Lactobacillus curvatus FBA2, Lactobacillus curvatus WiKim52, Lactobacillus curvatus WiKim38, Lactobacillus curvatus KG6, Lactobacillus curvatus MRS6…	Biosynthesis.AROMATIC-COMPOUNDS-BIOSYN.PWY-6458.
270	pyruvate to cytochrome bo oxidase electron transfer	966/2434	0.5	3	Lactobacillus, Escherichia coli, Klebsiella, Morganella, Proteus	Lactobacillus paracasei subsp. paracasei JCM 8130, Lactobacillus paracasei KL1, Escherichia coli PCN033, Escherichia coli O104:H4 FDAARGOS_348, Escherichia coli O104:H4 FDAARGOS_349, Escherichia coli O104:H4 FWSEC0009, Escherichia coli O157 180-PT54, Escherichia coli O157 644-PT8, Escherichia coli O157 FDAARGOS_293, Escherichia coli O157 Al Ain, Escherichia coli O157 AR-0430, Escherichia coli O15…
271	pyruvate to cytochrome bd oxidase electron transfer	250/2434	1.0	2.5	Lactobacillus, Escherichia coli, Klebsiella, Morganella, Proteus	Lactobacillus paracasei subsp. paracasei JCM 8130, Lactobacillus paracasei KL1, Escherichia coli O157 Al Ain, Escherichia coli O157 AR-0430, Escherichia coli O157 AR-0429, Escherichia coli O157 AR-0428, Escherichia coli O157 AR-0427, Escherichia coli O26 str. RM8426, Escherichia coli str. K-12 substr. MDS42, Escherichia coli str. K-12 substr. MDS42 MDS42 substr. SynA, Escherichia coli str. K-12 s…
272	trehalose degradation VI (periplasmic)	1343/2434	1.0	2	Lactobacillus, Escherichia coli, Klebsiella, Paraprevotella	Paraprevotella xylaniphila YIT 11841, Lactobacillus plantarum ZJ316, Lactobacillus plantarum X7021, Lactobacillus plantarum YW11, Lactobacillus plantarum SRCM103361, Escherichia coli PCN033, Escherichia coli O104:H4 FDAARGOS_348, Escherichia coli O104:H4 FDAARGOS_349, Escherichia coli O104:H4 FWSEC0009, Escherichia coli O157 180-PT54, Escherichia coli O157 644-PT8, Escherichia coli O157 FDAARGOS_…
273	trehalose degradation II (cytosolic)	1418/2434	1.0	1.5	Lactobacillus, Escherichia coli, Klebsiella, Paraprevotella, Lactococcus	Paraprevotella xylaniphila YIT 11841, Lactobacillus plantarum X7021, Lactobacillus plantarum YW11, Lactobacillus plantarum SRCM103361, Escherichia coli PCN033, Escherichia coli NA114, Escherichia coli O104:H4 TY-2482, Escherichia coli O104:H4 FDAARGOS_348, Escherichia coli O104:H4 FDAARGOS_349, Escherichia coli O104:H4 FWSEC0009, Escherichia coli O104:H4 LB226692, Escherichia coli O157 180-PT54, …
274	trehalose degradation IV	17/2434	1.0	1.33	Lactobacillus, Escherichia coli, Lactococcus, Enterococcus	Lactobacillus brevis SRCM101174, Lactobacillus brevis SRCM101106, Lactobacillus casei 12A, Lactobacillus plantarum subsp. plantarum NC8, Lactobacillus plantarum UCMA 3037, Lactobacillus plantarum 16, Lactobacillus plantarum WCFS1, Lactobacillus paracasei HDS-01, Lactobacillus paracasei LC355, Lactobacillus johnsonii IDCC9203, Escherichia coli NA114, Escherichia coli 2015C-4136CT1, Escherichia col…	Degradation.Carbohydrates-Degradation.Sugars-And-Polysaccharides-Degradation.Trehalose-Degradation.PWY-2722.
275	purine deoxyribonucleosides salvage	1360/2434	0.33	0.33	Lactobacillus, Escherichia coli, Lactococcus, Enterococcus, Turicibacter	Lactobacillus ginsenosidimutans EMML 3041, Lactobacillus frumenti LF145, Lactobacillus heilongjiangensis DSM 28069, Lactobacillus jensenii SNUV360, Lactobacillus curieae CCTCC M 2011381, Lactobacillus hokkaidonensis JCM 18461, Lactobacillus kullabergensis ESL0186, Lactobacillus helsingborgensis ESL0183, Lactobacillus nenjiangensis SH-Y15, Lactobacillus bombi BI-2.5, Lactobacillus kunkeei MP2, Lac…
276	homocysteine and cysteine interconversion	8/2434	1.0	1.25	Lactobacillus, Klebsiella	Lactobacillus paracasei CAUH35, Lactobacillus paracasei IIA, Lactobacillus paracasei subsp. paracasei, Klebsiella aerogenes FDAARGOS_152, Klebsiella aerogenes G7, Klebsiella aerogenes FDAARGOS_139, Klebsiella aerogenes AR_0009, Klebsiella aerogenes EA1509E	Activation-Inactivation-Interconversion.Interconversion.PWY-801./Biosynthesis.Amino-Acid-Biosynthesis.IND-AMINO-ACID-SYN.CYSTEINE-SYN.PWY-801.
277	benzene degradation	37/2434	0.5	0.5	Lactobacillus, Klebsiella	Lactobacillus plantarum EGD-AQ4, Lactobacillus plantarum B21, Lactobacillus curvatus MRS6, Klebsiella michiganensis AR375, Klebsiella quasipneumoniae subsp. similipneumoniae G747, Klebsiella quasipneumoniae CAV1947, Klebsiella quasipneumoniae L22, Klebsiella quasipneumoniae D120-1, Klebsiella quasipneumoniae HKUOPLA, Klebsiella quasipneumoniae HKUOPLC, Klebsiella quasipneumoniae G4584, Klebsiella…	Degradation.AROMATIC-COMPOUNDS-DEGRADATION.PWY-5450.
278	quinate degradation I	29/2434	0.67	1	Lactobacillus, Klebsiella	Lactobacillus iners DSM 13335, Lactobacillus gasseri 224-1, Klebsiella michiganensis KCTC 1686, Klebsiella michiganensis E718, Klebsiella sp. D5A, Klebsiella sp. P1CD1, Klebsiella variicola DX120E, Klebsiella variicola DSM 15968, Klebsiella variicola LMG 23571, Klebsiella variicola At-22, Klebsiella aerogenes FDAARGOS_327, Klebsiella aerogenes FDAARGOS_152, Klebsiella aerogenes G7, Klebsiella aer…	Degradation.AROMATIC-COMPOUNDS-DEGRADATION.Quinate-Degradation.QUINATEDEG-PWY.
279	indole-3-acetate biosynthesis V (bacteria and fungi)	10/2434	1.0	1	Lactobacillus, Klebsiella	Lactobacillus helveticus CNRZ32, Klebsiella pneumoniae subsp. pneumoniae NTUH-K2044, Klebsiella pneumoniae F1, Klebsiella pneumoniae F5, Klebsiella pneumoniae F77, Klebsiella pneumoniae F127, Klebsiella pneumoniae F132, Klebsiella pneumoniae F138, Klebsiella pneumoniae SWU01, Klebsiella pneumoniae subsp. pneumoniae SCKP020143	Biosynthesis.HORMONE-SYN.Plant-Hormone-Biosynthesis.Auxin-Biosynthesis.PWY-5026.
280	methylglyoxal degradation V	3/2434	1.0	1.33	Lactobacillus, Klebsiella	Lactobacillus malefermentans KCTC 3548, Lactobacillus acidipiscis KCTC 13900, Klebsiella pneumoniae subsp. pneumoniae DSM 30104	Degradation.Aldehyde-Degradation.Methylglyoxal-Detoxification.PWY-5458./Detoxification.Methylglyoxal-Detoxification.PWY-5458.
281	(S,S)-butanediol biosynthesis	9/2434	1.0	1	Lactobacillus, Klebsiella, Lactococcus	Lactobacillus brevis SRCM101174, Lactobacillus brevis SRCM101106, Klebsiella michiganensis E718, Lactococcus lactis subsp. lactis IO-1, Lactococcus lactis subsp. cremoris A76, Lactococcus lactis subsp. lactis NCDO 2118, Lactococcus lactis subsp. lactis Il1403, Lactococcus lactis subsp. cremoris MG1363, Lactococcus lactis subsp. cremoris NZ9000	Energy-Metabolism.Fermentation.Alcohol-Biosynthesis.Butanediol-Biosynthesis.PWY-6390.
282	(S,S)-butanediol degradation	9/2434	1.0	1	Lactobacillus, Klebsiella, Lactococcus	Lactobacillus brevis SRCM101174, Lactobacillus brevis SRCM101106, Klebsiella michiganensis E718, Lactococcus lactis subsp. lactis IO-1, Lactococcus lactis subsp. cremoris A76, Lactococcus lactis subsp. lactis NCDO 2118, Lactococcus lactis subsp. lactis Il1403, Lactococcus lactis subsp. cremoris MG1363, Lactococcus lactis subsp. cremoris NZ9000	Degradation.Alcohol-Degradation.2-3-Butanediol-Degradation.PWY-6388.
283	nitrogen fixation II (flavodoxin)	21/2434	1.0	1	Lactobacillus, Lactococcus	Lactobacillus delbrueckii subsp. bulgaricus MN-BM-F01, Lactobacillus delbrueckii subsp. bulgaricus DSM 20080, Lactobacillus delbrueckii subsp. bulgaricus ND04, Lactobacillus delbrueckii subsp. bulgaricus L99, Lactobacillus delbrueckii subsp. bulgaricus KLDS1.0207, Lactobacillus delbrueckii subsp. bulgaricus KLDS1.1011, Lactobacillus delbrueckii subsp. bulgaricus, Lactobacillus delbrueckii subsp. …	Degradation.Noncarbon-Nutrients.NITROGEN-DEG.Nitrogen-Fixation.PWY-7576.
284	peptidoglycan cross-bridge biosynthesis II (E. faecium)	152/2434	0.5	0.5	Lactobacillus, Lactococcus, Enterococcus	Lactobacillus jensenii 115-3-CHN, Lactobacillus iners DSM 13335, Lactobacillus brevis BSO 464, Lactobacillus brevis EW, Lactobacillus brevis AG48, Lactobacillus brevis SRCM101174, Lactobacillus brevis SRCM101106, Lactobacillus brevis subsp. gravesensis ATCC 27305, Lactobacillus brevis ATCC 14869 = DSM 20054, Lactobacillus casei BL23, Lactobacillus delbrueckii subsp. bulgaricus ATCC 11842 = JCM 10…	Biosynthesis.Cell-Structure-Biosynthesis.Cell-Wall-Biosynthesis.Peptidoglycan-Cross-Bridge-Biosynthesis.PWY-6461.
285	nitric oxide biosynthesis II (mammals)	15/2434	1.0	1	Lactobacillus, Lactococcus, Enterococcus	Lactobacillus plantarum ZJ316, Lactobacillus plantarum 16, Lactobacillus plantarum B21, Lactobacillus plantarum 5-2, Lactobacillus plantarum WCFS1, Lactobacillus plantarum subsp. plantarum ST-III, Lactobacillus reuteri I5007, Lactobacillus reuteri TD1, Lactobacillus reuteri DSM 20016, Lactobacillus fermentum F-6, Enterococcus mundtii QU 25, Lactococcus lactis subsp. lactis NCDO 2118, Lactococcus …	Degradation.Amino-Acid-Degradation.Proteinogenic-Amino-Acids-Degradation.ARGININE-DEG.PWY-4983./Biosynthesis.Metabolic-Regulators.Nitric-Oxide-Biosynthesis.PWY-4983./Biosynthesis.Amino-Acid-Biosynthesis.IND-AMINO-ACID-SYN.ARGININE-SYN.PWY-4983.
286	&alpha;-diglucosyldiacylglycerol biosynthesis	10/2434	0.5	0.5	Lactobacillus, Lactococcus, Enterococcus	Lactobacillus delbrueckii subsp. bulgaricus MN-BM-F01, Lactobacillus delbrueckii subsp. bulgaricus KLDS1.1011, Lactobacillus delbrueckii subsp. bulgaricus 2038, Enterococcus faecium SC4, Enterococcus faecium DO, Lactococcus lactis subsp. cremoris JM3, Lactococcus lactis subsp. lactis G423, Lactococcus lactis subsp. lactis 275, Lactococcus lactis subsp. lactis UC063, Lactococcus lactis subsp. lact…	Biosynthesis.Lipid-Biosynthesis.Glycolipids-Biosynthesis.PWY-7684.
287	L-malate degradation I	7/2434	1.0	1	Lactococcus	Lactococcus lactis IL6288, Lactococcus lactis IL1403, Lactococcus lactis subsp. lactis 229, Lactococcus lactis subsp. lactis 275, Lactococcus lactis subsp. lactis UC063, Lactococcus lactis subsp. lactis UL8, Lactococcus lactis subsp. lactis bv. diacetylactis FM03	Degradation.CARBOXYLATES-DEG.L-Malate-Degradation.PWY-7685./Detoxification.Acid-Resistance.PWY-7685.
288	phosphatidylcholine biosynthesis VI	3/2434	1.0	1	Megasphaera	Megasphaera stantonii AJH120, Megasphaera elsdenii DSM 20460, Megasphaera elsdenii NCIMB702410	Biosynthesis.Lipid-Biosynthesis.Phospholipid-Biosynthesis.PhosphatidylcholineBiosynthesis.PWY-6826.
289	arachidonate biosynthesis II (bacteria)	3/2434	1.0	2	Megasphaera	Megasphaera stantonii AJH120, Megasphaera elsdenii DSM 20460, Megasphaera elsdenii NCIMB702410	Biosynthesis.Lipid-Biosynthesis.Fatty-acid-biosynthesis.Unsaturated-Fatty-Acids-Biosynthesis.PUFA-Biosynthesis.Arachidonate-Biosynthesis.PWY-7583.
290	carbon monoxide oxidation to CO2	1/2434	1.0	1	Megasphaera	Megasphaera elsdenii DSM 20460	Degradation.C1-COMPOUNDS.PWY-7750.
291	betanidin degradation	8/2434	1.0	1	Megasphaera, Escherichia coli, Klebsiella	Megasphaera hexanoica MH, Escherichia coli ETEC H10407, Escherichia coli SE15, Escherichia coli O26:H11 str. 11368, Escherichia coli O111:H- str. 11128, Klebsiella pneumoniae 30660/NJST258_1, Klebsiella pneumoniae 30684/NJST258_2, Klebsiella pneumoniae subsp. pneumoniae NTUH-K2044	Degradation.SECONDARY-METABOLITE-DEGRADATION.N-CONTAINING-SECONDARY-CMPD-DEG.ALKALOIDS.PWY-5461.
292	pyruvate fermentation to acetate VIII	34/2434	1.0	1	Megasphaera, Lactobacillus, Escherichia coli, Klebsiella, Enterococcus	Megasphaera hexanoica MH, Lactobacillus brevis ATCC 14869 = DSM 20054, Lactobacillus plantarum subsp. plantarum NC8, Lactobacillus plantarum UCMA 3037, Lactobacillus plantarum WJL, Lactobacillus plantarum AY01, Lactobacillus plantarum 4_3, Lactobacillus plantarum 2025, Lactobacillus plantarum B21, Lactobacillus plantarum subsp. plantarum CGMCC 1.557, Lactobacillus plantarum subsp. plantarum ATCC …	Degradation.CARBOXYLATES-DEG.Acetate-Formation.Pyruvate-Acetate-Fermentation.PWY-5768./Energy-Metabolism.Fermentation.Pyruvate-Degradation.Pyruvate-Acetate-Fermentation.PWY-5768./Energy-Metabolism.Fermentation.Fermentation-to-Acids.Acetate-Formation.Pyruvate-Acetate-Fermentation.PWY-5768.
293	ammonia oxidation I (aerobic)	56/2434	0.5	0.5	Morganella, Enterococcus, Proteus, Desulfovibrio, Fusobacterium, Escherichia coli, Fusobacterium nucleatum, Klebsiella	Escherichia coli ETEC H10407, Klebsiella michiganensis RC10, Klebsiella michiganensis KNU07, Klebsiella variicola GJ1, Klebsiella variicola GJ2, Klebsiella variicola GJ3, Klebsiella pneumoniae CAV1016, Morganella morganii FDAARGOS_63, Morganella morganii KC-Tt-01, Morganella morganii AR_0133, Enterococcus faecalis ATCC 29212, Enterococcus faecalis D32, Enterococcus faecalis LD33, Enterococcus fae…	Degradation.Noncarbon-Nutrients.NITROGEN-DEG.Ammonia-oxidation.AMMOXID-PWY./Energy-Metabolism.CHEMOAUTOTROPHIC-ENERGY-METABOLISM.AMMOXID-PWY.
294	prenylated FMNH2 biosynthesis	15/2434	0.33	0.33	Morganella, Enterococcus, Proteus, Desulfovibrio, Lactobacillus, Escherichia coli, Klebsiella	Lactobacillus malefermentans CBA3618, Lactobacillus rhamnosus LOCK900, Lactobacillus rhamnosus LOCK908, Escherichia coli O145:H28 str. RM13516, Escherichia coli AR_0006, Escherichia coli CREC-544, Escherichia coli AR_0015, Klebsiella michiganensis M1, Klebsiella aerogenes AR_0007, Klebsiella aerogenes AR_0009, Klebsiella oxytoca JKo3, Morganella morganii SCMM102, Enterococcus faecium LS170308, Pr…	Biosynthesis.Cofactor-Biosynthesis.Vitamin-Biosynthesis.Flavin-Biosynthesis.PWY0-1597.
295	lipid A-core biosynthesis (E. coli K-12)	965/2434	0.45	0.45	Morganella, Proteus, Desulfovibrio, Oxalobacter, Escherichia coli, Bilophila wadsworthia, Klebsiella	Escherichia coli PCN033, Escherichia coli NA114, Escherichia coli O104:H4 TY-2482, Escherichia coli O104:H4 FDAARGOS_348, Escherichia coli O104:H4 FDAARGOS_349, Escherichia coli O104:H4 FWSEC0009, Escherichia coli O104:H4 LB226692, Escherichia coli O157 180-PT54, Escherichia coli O157 644-PT8, Escherichia coli O157 FDAARGOS_293, Escherichia coli O157 Al Ain, Escherichia coli O157 AR-0430, Escheri…
296	4-aminobutanoate degradation I	1488/2434	1.0	1	Odoribacter, Christensenella, Delftia, Porphyromonas, Morganella, Enterococcus, Proteus, Desulfovibrio, Lactobacillus, Escherichia coli, Aquabacterium, Klebsiella	Christensenella minuta DSM 22607, Odoribacter splanchnicus NCTC10825, Lactobacillus ginsenosidimutans EMML 3041, Lactobacillus heilongjiangensis DSM 28069, Lactobacillus curieae CCTCC M 2011381, Lactobacillus hokkaidonensis JCM 18461, Lactobacillus parabuchneri FAM21731, Lactobacillus pentosus SLC13, Lactobacillus pentosus DSM 20314, Lactobacillus plantarum 4_3, Lactobacillus plantarum LY-78, Lac…
297	nylon-6 oligomer degradation	18/2434	0.33	0.33	Odoribacter, Delftia, Klebsiella, Parabacteroides, Enterococcus	Odoribacter splanchnicus DSM 20712, Klebsiella variicola At-22, Klebsiella pneumoniae JH1, Klebsiella pneumoniae 1162281, Klebsiella pneumoniae KCTC 2242, Klebsiella pneumoniae subsp. pneumoniae Kp13, Klebsiella pneumoniae subsp. pneumoniae HS11286, Klebsiella pneumoniae subsp. pneumoniae 1084, Klebsiella pneumoniae CG43, Klebsiella pneumoniae JM45, Klebsiella pneumoniae 30660/NJST258_1, Klebsiel…	Degradation.Other-Degradation.P621-PWY.
298	assimilatory sulfate reduction III	51/2434	1.0	1.33	Odoribacter, Delftia, Proteus, Desulfovibrio, Escherichia coli, Aquabacterium, Klebsiella, Akkermansia	Odoribacter splanchnicus NCTC10825, Escherichia coli BH100 substr. MG2017, Escherichia coli CRE1540, Escherichia coli SMN197SH3, Escherichia coli SMN152SH1, Escherichia coli SMN013SH2, Klebsiella michiganensis E718, Klebsiella pneumoniae subsp. pneumoniae 1084, Klebsiella pneumoniae JS187, Akkermansia glycaniphila, Akkermansia muciniphila EB-AMDK-18, Akkermansia muciniphila EB-AMDK-19, Akkermansi…	Degradation.Noncarbon-Nutrients.Sulfur-Metabolism.Assimilatory-Sulfate-Reduction.PWY-6683.
299	malonate degradation II (biotin-dependent)	1/2434	0.25	0.25	Parabacteroides	Parabacteroides sp. ASF519	Degradation.CARBOXYLATES-DEG.Malonate-Degradation.PWY-6060.
300	formaldehyde assimilation III (dihydroxyacetone cycle)	1/2434	1.0	1.25	Parabacteroides	Parabacteroides distasonis ATCC 8503	Degradation.C1-COMPOUNDS.Formaldehyde-Assimilation.P185-PWY.
301	&kappa;-carrageenan degradation	1/2434	0.25	0.5	Parabacteroides	Parabacteroides distasonis CL03T12C09	Degradation.Polymer-Degradation.POLYSACCHARIDES-DEG.Carrageenan-Degradation.PWY-6821./Degradation.Carbohydrates-Degradation.POLYSACCHARIDES-DEG.Carrageenan-Degradation.PWY-6821.
302	sorbitol biosynthesis II	4/2434	1.0	1.33	Parabacteroides, Delftia, Klebsiella	Klebsiella pneumoniae 30660/NJST258_1, Klebsiella pneumoniae 30684/NJST258_2, Delftia acidovorans SPH-1, Parabacteroides distasonis ATCC 8503	Biosynthesis.SECONDARY-METABOLITE-BIOSYNTHESIS.SUGAR-DERIVS.Sugar-Alcohols-Biosynthesis.Sorbitol-Biosynthesis.PWY-5530.
303	CMP-KDO biosynthesis II (from D-arabinose 5-phosphate)	35/2434	1.0	1	Porphyromonas, Desulfovibrio, Megasphaera, Fusobacterium, Fusobacterium nucleatum, Parabacteroides, Klebsiella	Megasphaera hexanoica MH, Megasphaera elsdenii 14-14, Klebsiella pneumoniae Kp52.145, Porphyromonas gingivalis TDC60, Porphyromonas gingivalis W83, Porphyromonas gingivalis ATCC 33277, Fusobacterium sp. CAG:649, Fusobacterium nucleatum ChDC F128, Fusobacterium gonidiaformans ATCC 25563, Fusobacterium nucleatum subsp. fusiforme ATCC 51190, Fusobacterium russii ATCC 25533 593A, Fusobacterium necrop…	Biosynthesis.Carbohydrates-Biosynthesis.Polysaccharides-Biosynthesis.CMP-KDO-Biosynthesis.PWY-5111./Biosynthesis.Carbohydrates-Biosynthesis.CARBO-BIOSYNTHESIS.SUGAR-NUCLEOTIDES.PWY-5111.
304	incomplete reductive TCA cycle	1/2434	1.0	1.86	Selenomonas	Selenomonas ruminantium subsp. lactilytica TAM6421	Degradation.C1-COMPOUNDS.CO2-Fixation.Autotrophic-CO2-Fixation.Reductive-TCA-Cycles.P42-PWY.

## Sheet: Autoimmune-increased_Pathways
No.	Metabolic.Pathway	Present.in.X.org..Total.org.	Median.score	Median.frequency	Target.taxonomies	Strain.with.the.Pathway	Pathway.Hierarchy
1	&beta;-1,4-D-mannosyl-N-acetyl-D-glucosamine degradation	1/2434	0.67	0.67	Bacteroides	Bacteroides thetaiotaomicron 7330	Degradation.Carbohydrates-Degradation.PWY-7586.
2	heparan sulfate degradation	5/2434	0.33	0.33	Bacteroides	Bacteroides caecimuris I48, Bacteroides cellulosilyticus WH2, Bacteroides heparinolyticus F0111, Bacteroides ovatus 3725 D1 iv, Bacteroides thetaiotaomicron 7330	Degradation.Polymer-Degradation.POLYSACCHARIDES-DEG.Glycosaminoglycan-Degradation.PWY-7651./Degradation.Carbohydrates-Degradation.POLYSACCHARIDES-DEG.Glycosaminoglycan-Degradation.PWY-7651.
3	L-isoleucine biosynthesis II	1/2434	0.38	0.62	Bacteroides	Bacteroides salanitronis DSM 18170	Biosynthesis.Amino-Acid-Biosynthesis.IND-AMINO-ACID-SYN.ISOLEUCINE-SYN.PWY-5101.
4	mannitol degradation II	1/2434	1.0	1.33	Bacteroides	Bacteroides ovatus SD CC 2a	Degradation.SECONDARY-METABOLITE-DEGRADATION.Sugar-Derivatives.SUGAR-ALCOHOLS-DEG.PWY-3861./Degradation.Carbohydrates-Degradation.Sugars-And-Polysaccharides-Degradation.PWY-3861.
5	glucuronoarabinoxylan degradation	1/2434	1.0	1	Bacteroides	Bacteroides vulgatus ATCC 8482	Glycan-PWY-6813./Degradation.Polymer-Degradation.POLYSACCHARIDES-DEG.PWY-6813./Degradation.Carbohydrates-Degradation.POLYSACCHARIDES-DEG.PWY-6813.
6	CDP-abequose biosynthesis	1/2434	1.0	1	Bacteroides	Bacteroides thetaiotaomicron VPI-5482	Biosynthesis.Carbohydrates-Biosynthesis.CARBO-BIOSYNTHESIS.SUGAR-NUCLEOTIDES.CDP-Sugar-Biosynthesis.PWY-5831.
7	dTDP-4-O-demethyl-&beta;-L-noviose biosynthesis	1/2434	0.6	1	Bifidobacterium longum	Bifidobacterium longum 35624	Biosynthesis.Carbohydrates-Biosynthesis.CARBO-BIOSYNTHESIS.SUGAR-NUCLEOTIDES.dTDP-Sugar-Biosynthesis.PWY-7301.
8	L-arginine degradation X (arginine monooxygenase pathway)	9/2434	0.33	0.33	Bifidobacterium longum, Eggerthella	Eggerthella lenta DSM 2243, Eggerthella lenta C592, Bifidobacterium longum subsp. longum AH1206, Bifidobacterium longum subsp. infantis CECT 7210, Bifidobacterium longum subsp. infantis NCTC11817, Bifidobacterium longum 105-A, Bifidobacterium longum BG7, Bifidobacterium longum subsp. infantis ATCC 15697 = JCM 1222 = DSM 20088, Bifidobacterium longum subsp. longum JCM 1217	Degradation.Amino-Acid-Degradation.Proteinogenic-Amino-Acids-Degradation.ARGININE-DEG.ARGDEG-V-PWY.
9	3-amino-5-hydroxybenzoate biosynthesis	4/2434	0.14	0.14	Bifidobacterium longum, Olsenella	Olsenella uli DSM 7084, Bifidobacterium longum NCC2705, Bifidobacterium longum 105-A, Bifidobacterium longum subsp. longum JCM 1217	Biosynthesis.SECONDARY-METABOLITE-BIOSYNTHESIS.PWY-5979.
10	methylphosphonate degradation II	2/2434	1.0	1.5	Eggerthella	Eggerthella lenta DSM 2243, Eggerthella lenta C592	Degradation.Noncarbon-Nutrients.Phosphorus-Compounds.Methylphosphonate-Degradation.PWY-7399.
11	L-tyrosine biosynthesis II	1/2434	0.33	0.33	Eubacterium rectale CAG:36	Eubacterium rectale CAG 36	Biosynthesis.Amino-Acid-Biosynthesis.IND-AMINO-ACID-SYN.TYROSINE-SYN.PWY-3461.
12	2-methylcitrate cycle II	1/2434	0.17	0.17	Flavonifractor	Flavonifractor plautii YL31	Degradation.CARBOXYLATES-DEG.Propionate-Degradation.Methyl-Citrate-Cycle.PWY-5747.
13	(4S)-carveol and (4S)-dihydrocarveol degradation	1/2434	0.14	0.14	Lachnoclostridium	Clostridium symbiosum ATCC 14940	Degradation.SECONDARY-METABOLITE-DEGRADATION.TERPENOID-DEG.Carveol-Degradation.PWY-5927.
14	sulfoacetate degradation	1/2434	0.5	0.5	Lachnoclostridium	[Clostridium] hylemonae DSM 15053	Degradation.Noncarbon-Nutrients.Sulfur-Metabolism.PWY-6593.
15	pyruvate fermentation to butanol I	4/2434	0.31	0.69	Lachnoclostridium, Flavonifractor, Eubacterium rectale CAG:36	Clostridium symbiosum ATCC 14940, Clostridium citroniae WAL-17108, Flavonifractor plautii YL31, Eubacterium rectale CAG 36	Energy-Metabolism.Fermentation.Pyruvate-Degradation.Pyruvate-Butanol-Fermentation.PWY-6583./Energy-Metabolism.Fermentation.Alcohol-Biosynthesis.Pyruvate-Butanol-Fermentation.PWY-6583./Energy-Metabolism.Fermentation.Alcohol-Biosynthesis.PWY-6583.
16	phosphinothricin tripeptide biosynthesis	1/2434	0.11	0.11	Olsenella	Olsenella uli DSM 7084	Biosynthesis.SECONDARY-METABOLITE-BIOSYNTHESIS.Antibiotic-Biosynthesis.PWY-6322.
17	salinosporamide A biosynthesis	1/2434	0.13	0.27	Olsenella	Olsenella uli DSM 7084	Biosynthesis.SECONDARY-METABOLITE-BIOSYNTHESIS.POLYKETIDE-SYN.PWY-6627.

## Sheet: Cancer-incr_Bacteroide_Pathways
SL.No.	Metabolic.Pathway	Present.in.X.org..Total.org.	Median.score	Median.frequency	Target.taxonomies	Strain.with.the.Pathway	Pathway.Hierarchy
1	putrescine biosynthesis I	2/75	1.0	1	Odoribacter	Odoribacter splanchnicus NCTC10825, Odoribacter splanchnicus DSM 20712	Biosynthesis.Polyamine-Biosynthesis.Putrescine-Biosynthesis.PWY-40.
2	pyridoxal 5'-phosphate biosynthesis II	1/75	1.0	1	Odoribacter	Odoribacter splanchnicus DSM 20712	Biosynthesis.Cofactor-Biosynthesis.Vitamin-Biosynthesis.Vitamin-B6-Biosynthesis.PWY-6466.
3	assimilatory sulfate reduction III	1/75	0.67	1	Odoribacter	Odoribacter splanchnicus NCTC10825	Degradation.Noncarbon-Nutrients.Sulfur-Metabolism.Assimilatory-Sulfate-Reduction.PWY-6683.
4	L-tryptophan degradation I (via anthranilate)	1/75	0.33	0.33	Odoribacter	Odoribacter splanchnicus DSM 20712	Degradation.Amino-Acid-Degradation.Proteinogenic-Amino-Acids-Degradation.TRYPTOPHAN-DEG.TRPCAT-PWY.
5	ethanolamine utilization	1/75	0.8	0.8	Odoribacter	Odoribacter splanchnicus NCTC10825	Degradation.AMINE-DEG.PWY0-1477.
6	urea degradation II	2/75	1.0	3	Odoribacter	Odoribacter splanchnicus NCTC10825, Odoribacter splanchnicus DSM 20712	Degradation.AMINE-DEG.Urea-Degradation.PWY-5704.
7	L-arginine degradation III (arginine decarboxylase/agmatinase pathway)	2/75	1.0	1	Odoribacter	Odoribacter splanchnicus NCTC10825, Odoribacter splanchnicus DSM 20712	Degradation.Amino-Acid-Degradation.Proteinogenic-Amino-Acids-Degradation.ARGININE-DEG.PWY0-823.
8	L-tryptophan degradation to 2-amino-3-carboxymuconate semialdehyde	1/75	0.2	0.2	Odoribacter	Odoribacter splanchnicus DSM 20712	Degradation.Amino-Acid-Degradation.Proteinogenic-Amino-Acids-Degradation.TRYPTOPHAN-DEG.PWY-5651.
9	nylon-6 oligomer degradation	2/75	0.33	0.33	Odoribacter, Parabacteroides	Odoribacter splanchnicus DSM 20712, Parabacteroides distasonis ATCC 8503	Degradation.Other-Degradation.P621-PWY.
10	L-lysine biosynthesis I	3/75	0.78	1	Odoribacter, Paraprevotella	Odoribacter splanchnicus NCTC10825, Odoribacter splanchnicus DSM 20712, Paraprevotella xylaniphila YIT 11841	Biosynthesis.Amino-Acid-Biosynthesis.IND-AMINO-ACID-SYN.LYSINE-SYN.DAPLYSINESYN-PWY.
11	4-aminobutanoate degradation I	5/75	0.5	0.5	Odoribacter, Porphyromonas	Porphyromonas gingivalis TDC60, Porphyromonas gingivalis AJW4, Porphyromonas gingivalis W83, Porphyromonas gingivalis ATCC 33277, Odoribacter splanchnicus NCTC10825	Degradation.AMINE-DEG.4-Aminobutyraye-Degradation.PWY-6535.
12	NAD biosynthesis from 2-amino-3-carboxymuconate semialdehyde	2/75	0.75	0.75	Odoribacter, Porphyromonas asaccharolytica, Porphyromonas	Porphyromonas asaccharolytica DSM 20707, Odoribacter splanchnicus NCTC10825, Porphyromonas asaccharolytica DSM 20707	Biosynthesis.Cofactor-Biosynthesis.NAD-Metabolism.NAD-SYN.PWY-5653.
13	dTDP-D-desosamine biosynthesis	1/75	0.5	0.5	Parabacteroides	Parabacteroides johnsonii DSM 18315	Biosynthesis.Carbohydrates-Biosynthesis.CARBO-BIOSYNTHESIS.SUGAR-NUCLEOTIDES.dTDP-Sugar-Biosynthesis.PWY-6942.
14	sulfide oxidation II (sulfide dehydrogenase)	6/75	1.0	2	Parabacteroides	Parabacteroides sp. ASF519, Parabacteroides johnsonii DSM 18315, Parabacteroides merdae ATCC 43184, Parabacteroides sp. 20_3, Parabacteroides distasonis CL03T12C09, Parabacteroides distasonis CL09T03C24	Degradation.Noncarbon-Nutrients.Sulfur-Metabolism.Sulfide-Oxidation.PWY-5274.
15	sulfur reduction II (via polysulfide)	6/75	0.5	1	Parabacteroides	Parabacteroides sp. ASF519, Parabacteroides johnsonii DSM 18315, Parabacteroides merdae ATCC 43184, Parabacteroides sp. 20_3, Parabacteroides distasonis CL03T12C09, Parabacteroides distasonis CL09T03C24	Degradation.Noncarbon-Nutrients.Sulfur-Metabolism.Sulfur-reduction.PWY-5364.
16	ethylene glycol degradation	1/75	1.0	1	Parabacteroides	Parabacteroides sp. ASF519	Degradation.Alcohol-Degradation.PWY0-1280.
17	&kappa;-carrageenan degradation	1/75	0.25	0.5	Parabacteroides	Parabacteroides distasonis CL03T12C09	Degradation.Polymer-Degradation.POLYSACCHARIDES-DEG.Carrageenan-Degradation.PWY-6821./Degradation.Carbohydrates-Degradation.POLYSACCHARIDES-DEG.Carrageenan-Degradation.PWY-6821.
18	sorbitol biosynthesis II	1/75	1.0	1	Parabacteroides	Parabacteroides distasonis ATCC 8503	Biosynthesis.SECONDARY-METABOLITE-BIOSYNTHESIS.SUGAR-DERIVS.Sugar-Alcohols-Biosynthesis.Sorbitol-Biosynthesis.PWY-5530.
19	malonate degradation II (biotin-dependent)	1/75	0.25	0.25	Parabacteroides	Parabacteroides sp. ASF519	Degradation.CARBOXYLATES-DEG.Malonate-Degradation.PWY-6060.
20	citrate degradation	1/75	0.4	0.4	Parabacteroides	Parabacteroides distasonis CL03T12C09	Degradation.CARBOXYLATES-DEG.PWY-6038.
21	hydrogen to trimethylamine N-oxide electron transfer	3/75	0.5	0.5	Parabacteroides	Parabacteroides sp. CT06, Parabacteroides distasonis CavFT-hAR46, Parabacteroides distasonis NBRC 113806	Energy-Metabolism.Respiration.ANAEROBIC-RESPIRATION.PWY0-1578./Energy-Metabolism.Electron-Transfer.PWY0-1578.
22	copper transport I	3/75	0.5	0.5	Parabacteroides	Parabacteroides sp. ASF519, Parabacteroides distasonis CL03T12C09, Parabacteroides distasonis CL09T03C24	Transport-PWY-6135
23	L-dopa and L-dopachrome biosynthesis	2/75	0.33	0.33	Parabacteroides	Parabacteroides distasonis CL03T12C09, Parabacteroides distasonis CL09T03C24	Biosynthesis.Other-biosynthesis.PWY-6481.
24	3-chlorocatechol degradation II (ortho)	1/75	0.2	0.2	Parabacteroides	Parabacteroides distasonis CL03T12C09	Degradation.CHLORINATED-COMPOUNDS-DEG.Chloroaromatic-Compounds-Degradation.Chlorocatechol-Degradation.3-Chlorocatechol-Degradation.PWY-6193./Degradation.AROMATIC-COMPOUNDS-DEGRADATION.Chloroaromatic-Compounds-Degradation.Chlorocatechol-Degradation.3-Chlorocatechol-Degradation.PWY-6193.
25	S-methyl-5'-thioadenosine degradation III	6/75	0.5	0.5	Parabacteroides	Parabacteroides sp. ASF519, Parabacteroides johnsonii DSM 18315, Parabacteroides merdae ATCC 43184, Parabacteroides sp. 20_3, Parabacteroides distasonis CL03T12C09, Parabacteroides distasonis CL09T03C24	Degradation.NUCLEO-DEG.Methylthioadenosine-Degradation.PWY-6753.
26	hydrogen to dimethyl sulfoxide electron transfer	3/75	0.5	0.5	Parabacteroides	Parabacteroides sp. CT06, Parabacteroides distasonis CavFT-hAR46, Parabacteroides distasonis NBRC 113806	Energy-Metabolism.Respiration.ANAEROBIC-RESPIRATION.PWY0-1577./Energy-Metabolism.Electron-Transfer.PWY0-1577.
27	o-diquinones biosynthesis	2/75	1.0	1	Parabacteroides	Parabacteroides distasonis CL03T12C09, Parabacteroides distasonis CL09T03C24	Biosynthesis.AROMATIC-COMPOUNDS-BIOSYN.PWY-6752.
28	formate oxidation to CO2	1/75	1.0	1	Parabacteroides	Parabacteroides sp. 20_3	Degradation.C1-COMPOUNDS.PWY-1881./Energy-Metabolism.CHEMOAUTOTROPHIC-ENERGY-METABOLISM.PWY-1881.
29	formaldehyde assimilation III (dihydroxyacetone cycle)	1/75	1.0	1.25	Parabacteroides	Parabacteroides distasonis ATCC 8503	Degradation.C1-COMPOUNDS.Formaldehyde-Assimilation.P185-PWY.
30	trehalose degradation I (low osmolarity)	1/75	1.0	1	Parabacteroides	Parabacteroides distasonis NBRC 113806	Degradation.Carbohydrates-Degradation.Sugars-And-Polysaccharides-Degradation.Trehalose-Degradation.TREDEGLOW-PWY.
31	phosphonoacetate degradation	1/75	1.0	1	Parabacteroides	Parabacteroides distasonis CL09T03C24	Degradation.Noncarbon-Nutrients.Phosphorus-Compounds.P483-PWY.
32	dTDP-3-acetamido-&alpha;-D-fucose biosynthesis	1/75	0.8	0.8	Parabacteroides	Parabacteroides merdae ATCC 43184	Biosynthesis.Carbohydrates-Biosynthesis.CARBO-BIOSYNTHESIS.SUGAR-NUCLEOTIDES.dTDP-Sugar-Biosynthesis.PWY-6953.
33	ethanol degradation IV	1/75	1.0	1.33	Parabacteroides	Parabacteroides distasonis ATCC 8503	Degradation.Alcohol-Degradation.Ethanol-Degradation.PWY66-162.
34	hydrogen to fumarate electron transfer	3/75	1.0	1.5	Parabacteroides	Parabacteroides sp. CT06, Parabacteroides distasonis CavFT-hAR46, Parabacteroides distasonis NBRC 113806	Energy-Metabolism.Respiration.ANAEROBIC-RESPIRATION.PWY0-1576./Energy-Metabolism.Electron-Transfer.PWY0-1576.
35	L-ascorbate degradation II (bacterial, aerobic)	1/75	0.12	0.12	Parabacteroides	Parabacteroides distasonis ATCC 8503	Degradation.CARBOXYLATES-DEG.Ascorbate-Degradation.PWY-6961.
36	L-rhamnose degradation II	6/75	0.11	0.11	Parabacteroides	Parabacteroides sp. ASF519, Parabacteroides johnsonii DSM 18315, Parabacteroides merdae ATCC 43184, Parabacteroides sp. 20_3, Parabacteroides distasonis CL03T12C09, Parabacteroides distasonis CL09T03C24	Degradation.Carbohydrates-Degradation.Sugars-And-Polysaccharides-Degradation.L-rhamnose-Degradation.PWY-6713.
37	photosynthesis light reactions	7/75	0.25	0.5	Parabacteroides, Porphyromonas	Porphyromonas gingivalis TDC60, Porphyromonas gingivalis W83, Porphyromonas gingivalis ATCC 33277, Parabacteroides sp. ASF519, Parabacteroides johnsonii DSM 18315, Parabacteroides merdae ATCC 43184, Parabacteroides sp. 20_3	Energy-Metabolism.Electron-Transfer.PWY-101./Energy-Metabolism.Photosynthesis.PWY-101.
38	glycerol degradation V	4/75	0.5	0.5	Parabacteroides, Porphyromonas	Porphyromonas gingivalis W83, Porphyromonas gingivalis A7436, Parabacteroides distasonis ATCC 8503, Parabacteroides distasonis CL03T12C09	Degradation.Alcohol-Degradation.GLYCEROL-DEG.GLYCEROLMETAB-PWY.
39	CMP-KDO biosynthesis II (from D-arabinose 5-phosphate)	9/75	1.0	1	Parabacteroides, Porphyromonas	Porphyromonas gingivalis TDC60, Porphyromonas gingivalis W83, Porphyromonas gingivalis ATCC 33277, Parabacteroides johnsonii DSM 18315, Parabacteroides merdae ATCC 43184, Parabacteroides sp. 20_3, Parabacteroides distasonis ATCC 8503, Parabacteroides distasonis CL03T12C09, Parabacteroides distasonis CL09T03C24	Biosynthesis.Carbohydrates-Biosynthesis.Polysaccharides-Biosynthesis.CMP-KDO-Biosynthesis.PWY-5111./Biosynthesis.Carbohydrates-Biosynthesis.CARBO-BIOSYNTHESIS.SUGAR-NUCLEOTIDES.PWY-5111.
40	trehalose degradation II (cytosolic)	1/75	0.5	0.5	Paraprevotella	Paraprevotella xylaniphila YIT 11841	Degradation.Carbohydrates-Degradation.Sugars-And-Polysaccharides-Degradation.Trehalose-Degradation.PWY0-1182.
41	trehalose degradation VI (periplasmic)	1/75	1.0	2	Paraprevotella	Paraprevotella xylaniphila YIT 11841	Degradation.Carbohydrates-Degradation.Sugars-And-Polysaccharides-Degradation.Trehalose-Degradation.PWY0-1466.
42	adenine and adenosine salvage III	2/75	1.0	1.25	Porphyromonas	Porphyromonas gingivalis KCOM 2800, Porphyromonas gingivalis KCOM 2803	Biosynthesis.Nucleotide-Biosynthesis.PUR-NUC-SYN.Purine-Nucleotides-Salvage.Adenine-Adenosine-Salvage.PWY-6609.
43	adenosine nucleotides degradation II	4/75	0.6	0.7	Porphyromonas	Porphyromonas gingivalis A7A1-28, Porphyromonas gingivalis KCOM 2800, Porphyromonas gingivalis KCOM 2799, Porphyromonas gingivalis KCOM 2803	Degradation.NUCLEO-DEG.Purine-Degradation.Adenosine-Nucleotides-Degradation.SALVADEHYPOX-PWY.
44	adenosylcobinamideGDP salvage from cobinamide II	17/75	0.67	1	Porphyromonas	Porphyromonas cangingivalis NCTC12856, Porphyromonas gingivalis 381, Porphyromonas gingivalis AJW4, Porphyromonas gingivalis A7A1-28, Porphyromonas gingivalis KCOM 2796, Porphyromonas gingivalis KCOM 2798, Porphyromonas gingivalis KCOM 2800, Porphyromonas gingivalis TDC 60, Porphyromonas gingivalis A7436, Porphyromonas gingivalis KCOM 3131, Porphyromonas gingivalis KCOM 2799, Porphyromonas gingiv…	Biosynthesis.Cofactor-Biosynthesis.Vitamin-Biosynthesis.Cobalamin-Biosynthesis.Cobamide-Salvage.B12-Salvage-From-Cobinamide.PWY-7972.
45	L-selenocysteine biosynthesis I (bacteria)	3/75	0.67	0.67	Porphyromonas	Porphyromonas gingivalis TDC60, Porphyromonas gingivalis W83, Porphyromonas gingivalis ATCC 33277	Biosynthesis.Amino-Acid-Biosynthesis.IND-AMINO-ACID-SYN.Selenocysteine-Biosynthesis.PWY0-901.
46	pyruvate fermentation to ethanol III	5/75	0.67	0.67	Porphyromonas	Porphyromonas gingivalis 381, Porphyromonas gingivalis KCOM 2796, Porphyromonas gingivalis TDC 60, Porphyromonas gingivalis A7436, Porphyromonas gingivalis KCOM 2802	Energy-Metabolism.Fermentation.Pyruvate-Degradation.Pyruvate-Ethanol-Fermentation.PWY-6587./Energy-Metabolism.Fermentation.Alcohol-Biosynthesis.Pyruvate-Ethanol-Fermentation.PWY-6587.
47	glycerol degradation II	1/75	0.5	0.5	Porphyromonas	Porphyromonas gingivalis A7436	Degradation.Alcohol-Degradation.GLYCEROL-DEG.PWY-6131.
48	Calvin-Benson-Bassham cycle	1/75	0.69	0.77	Porphyromonas	Porphyromonas gingivalis A7436	Degradation.C1-COMPOUNDS.CO2-Fixation.Autotrophic-CO2-Fixation.CALVIN-PWY./Energy-Metabolism.Photosynthesis.CALVIN-PWY./Biosynthesis.Carbohydrates-Biosynthesis.CARBO-BIOSYNTHESIS.CALVIN-PWY.
49	NAD phosphorylation and transhydrogenation	19/75	1.0	1.5	Porphyromonas asaccharolytica, Porphyromonas	Porphyromonas asaccharolytica DSM 20707, Porphyromonas cangingivalis NCTC12856, Porphyromonas crevioricanis NCTC12858, Porphyromonas gingivalis 381, Porphyromonas gingivalis AJW4, Porphyromonas gingivalis A7A1-28, Porphyromonas gingivalis KCOM 2796, Porphyromonas gingivalis KCOM 2798, Porphyromonas gingivalis KCOM 2800, Porphyromonas gingivalis TDC 60, Porphyromonas gingivalis A7436, Porphyromona…	Biosynthesis.Cofactor-Biosynthesis.NAD-Metabolism.NADPHOS-DEPHOS-PWY-1.
50	5-oxo-L-proline metabolism	1/75	0.17	0.17	Porphyromonas asaccharolytica, Porphyromonas	Porphyromonas asaccharolytica DSM 20707, Porphyromonas asaccharolytica DSM 20707	Macromolecule-Modification.Protein-Modification.PWY-7942.
51	L-methionine degradation II	22/75	0.33	0.33	Porphyromonas asaccharolytica, Porphyromonas	Porphyromonas asaccharolytica DSM 20707, Porphyromonas cangingivalis NCTC12856, Porphyromonas crevioricanis NCTC12858, Porphyromonas gingivalis TDC60, Porphyromonas gingivalis 381, Porphyromonas gingivalis AJW4, Porphyromonas gingivalis A7A1-28, Porphyromonas gingivalis W83, Porphyromonas gingivalis ATCC 33277, Porphyromonas gingivalis KCOM 2796, Porphyromonas gingivalis KCOM 2798, Porphyromonas …	Degradation.Amino-Acid-Degradation.Proteinogenic-Amino-Acids-Degradation.METHIONINE-DEG.PWY-701.
52	acetoacetate degradation (to acetyl CoA)	14/75	0.5	0.5	Porphyromonas asaccharolytica, Porphyromonas	Porphyromonas asaccharolytica DSM 20707, Porphyromonas gingivalis 381, Porphyromonas gingivalis AJW4, Porphyromonas gingivalis KCOM 2796, Porphyromonas gingivalis KCOM 2798, Porphyromonas gingivalis TDC 60, Porphyromonas gingivalis A7436, Porphyromonas gingivalis KCOM 3131, Porphyromonas gingivalis KCOM 2799, Porphyromonas gingivalis KCOM 2801, Porphyromonas gingivalis KCOM 2802, Porphyromonas gi…	Degradation.Fatty-Acid-and-Lipid-Degradation.ACETOACETATE-DEG-PWY.
53	heme b biosynthesis I (aerobic)	18/75	0.5	0.5	Porphyromonas asaccharolytica, Porphyromonas	Porphyromonas asaccharolytica DSM 20707, Porphyromonas cangingivalis NCTC12856, Porphyromonas gingivalis 381, Porphyromonas gingivalis AJW4, Porphyromonas gingivalis A7A1-28, Porphyromonas gingivalis KCOM 2796, Porphyromonas gingivalis KCOM 2798, Porphyromonas gingivalis KCOM 2800, Porphyromonas gingivalis TDC 60, Porphyromonas gingivalis A7436, Porphyromonas gingivalis KCOM 3131, Porphyromonas g…	Biosynthesis.Cofactor-Biosynthesis.Porphyrin-Compounds-Biosynthesis.HEME-SYN.Heme-b-Biosynthesis.HEME-BIOSYNTHESIS-II.

## Sheet: Auto-incr_Bacteroide_Pathways
No.	Metabolic.Pathway	Present.in.X.org..Total.org.	Median.score	Median.frequency	Target.taxonomies	Strain.with.the.Pathway	Pathway.Hierarchy
1	rhamnogalacturonan type I degradation II (bacteria)	4/75	0.67	1	Bacteroides	Bacteroides ovatus SD CMC 3f, Bacteroides xylanisolvens XB1A, Bacteroides ovatus SD CC 2a, Bacteroides xylanisolvens SD CC 1b	Degradation.Polymer-Degradation.POLYSACCHARIDES-DEG.Rhamnogalacturonan-Degradation.PWY-6771./Degradation.Carbohydrates-Degradation.POLYSACCHARIDES-DEG.Rhamnogalacturonan-Degradation.PWY-6771.
2	CDP-abequose biosynthesis	1/75	1.0	1	Bacteroides	Bacteroides thetaiotaomicron VPI-5482	Biosynthesis.Carbohydrates-Biosynthesis.CARBO-BIOSYNTHESIS.SUGAR-NUCLEOTIDES.CDP-Sugar-Biosynthesis.PWY-5831.
3	conversion of succinate to propanoate	1/75	1.0	1.33	Bacteroides	Bacteroides ovatus SD CMC 3f	Degradation.CARBOXYLATES-DEG.SUCC-DEG.PWY0-43.
4	dermatan sulfate degradation I (bacterial)	11/75	0.25	0.25	Bacteroides	Bacteroides cellulosilyticus WH2, Bacteroides ovatus V975, Bacteroides ovatus 3725 D1 iv, Bacteroides ovatus ATCC 8483, Bacteroides intestinalis APC919/174, Bacteroides dorei, Bacteroides dorei CL03T12C01, Bacteroides xylanisolvens H207, Bacteroides salanitronis DSM 18170, Bacteroides caccae ATCC 43185, Bacteroides vulgatus VIC01	Degradation.Polymer-Degradation.POLYSACCHARIDES-DEG.Glycosaminoglycan-Degradation.PWY-7646./Degradation.Carbohydrates-Degradation.POLYSACCHARIDES-DEG.Glycosaminoglycan-Degradation.PWY-7646.
5	sitosterol degradation to androstenedione	1/75	0.06	0.06	Bacteroides	Bacteroides xylanisolvens XB1A	Degradation.Fatty-Acid-and-Lipid-Degradation.Steroids-Degradation.PWY-6948.
6	glutathionylspermidine biosynthesis	1/75	1.0	1	Bacteroides	Bacteroides vulgatus ATCC 8482	Biosynthesis.Polyamine-Biosynthesis.PWY-4121./Biosynthesis.Cofactor-Biosynthesis.Reductants.PWY-4121.
7	penicillin K biosynthesis	1/75	1.0	1	Bacteroides	Bacteroides ovatus SD CMC 3f	Biosynthesis.SECONDARY-METABOLITE-BIOSYNTHESIS.Antibiotic-Biosynthesis.PWY-5630.
8	pyrimidine deoxyribonucleotides de novo biosynthesis III	1/75	0.78	1	Bacteroides	Bacteroides ovatus 3725 D1 iv	Metabolic-Clusters.PWY-6545./Biosynthesis.Nucleotide-Biosynthesis.PYR-NUC-SYN.Pyrimidine-De-Novo-Biosyn.Pyrimid-Deoxyribonucleot-De-Novo-Biosyn.PWY-6545./Biosynthesis.Nucleotide-Biosynthesis.Deoxyribonucleotide-Biosynthesis.Pyrimid-Deoxyribonucleot-De-Novo-Biosyn.PWY-6545.
9	pectin degradation I	8/75	0.67	1.33	Bacteroides	Bacteroides caecimuris I48, Bacteroides cellulosilyticus WH2, Bacteroides ovatus V975, Bacteroides ovatus ATCC 8483, Bacteroides dorei, Bacteroides dorei CL03T12C01, Bacteroides salanitronis DSM 18170, Bacteroides thetaiotaomicron 7330	Glycan-Glycan-Degradation.PWY-7246./Degradation.Polymer-Degradation.POLYSACCHARIDES-DEG.Glycan-Degradation.PWY-7246./Degradation.Polymer-Degradation.POLYSACCHARIDES-DEG.Pectin-Degradation.PWY-7246./Degradation.Carbohydrates-Degradation.POLYSACCHARIDES-DEG.Glycan-Degradation.PWY-7246./Degradation.Carbohydrates-Degradation.POLYSACCHARIDES-DEG.Pectin-Degradation.PWY-7246.
10	nitrogen fixation I (ferredoxin)	1/75	1.0	5	Bacteroides	Bacteroides reticulotermitis JCM 10512	Degradation.Noncarbon-Nutrients.NITROGEN-DEG.Nitrogen-Fixation.N2FIX-PWY.
11	L-isoleucine biosynthesis II	1/75	0.38	0.62	Bacteroides	Bacteroides salanitronis DSM 18170	Biosynthesis.Amino-Acid-Biosynthesis.IND-AMINO-ACID-SYN.ISOLEUCINE-SYN.PWY-5101.
12	fatty acid biosynthesis initiation III	2/75	1.0	1.75	Bacteroides	Bacteroides reticulotermitis JCM 10512, Bacteroides ovatus SD CMC 3f	Biosynthesis.Lipid-Biosynthesis.Fatty-acid-biosynthesis.PWY-5965.
13	pectin degradation II	15/75	0.4	0.6	Bacteroides	Bacteroides caecimuris I48, Bacteroides cellulosilyticus WH2, Bacteroides heparinolyticus F0111, Bacteroides ovatus V975, Bacteroides ovatus 3725 D1 iv, Bacteroides ovatus ATCC 8483, Bacteroides zoogleoformans ATCC 33285, Bacteroides intestinalis APC919/174, Bacteroides dorei, Bacteroides dorei CL03T12C01, Bacteroides xylanisolvens H207, Bacteroides salanitronis DSM 18170, Bacteroides caccae ATCC…	Degradation.Polymer-Degradation.POLYSACCHARIDES-DEG.Pectin-Degradation.PWY-7248./Degradation.Carbohydrates-Degradation.POLYSACCHARIDES-DEG.Pectin-Degradation.PWY-7248.
14	testosterone and androsterone degradation to androstendione	1/75	0.33	0.33	Bacteroides	Bacteroides salanitronis DSM 18170	Degradation.Fatty-Acid-and-Lipid-Degradation.Steroids-Degradation.PWY-6943.
15	pyruvate fermentation to (S)-lactate	2/75	1.0	3	Bacteroides	Bacteroides reticulotermitis JCM 10512, Bacteroides vulgatus ATCC 8482	Energy-Metabolism.Fermentation.Pyruvate-Degradation.Pyruvate-Lactate-Fermentation.PWY-5481./Energy-Metabolism.Fermentation.Fermentation-to-Acids.Fermentation-to-Lactate.Pyruvate-Lactate-Fermentation.PWY-5481.
16	sulfolactate degradation II	1/75	0.5	0.5	Bacteroides	Bacteroides thetaiotaomicron VPI-5482	Degradation.Noncarbon-Nutrients.Sulfur-Metabolism.Sulfolactate-Degradation.PWY-6637.
17	formaldehyde oxidation VII (THF pathway)	15/75	0.75	0.75	Bacteroides	Bacteroides caecimuris I48, Bacteroides cellulosilyticus WH2, Bacteroides sp. A1C1, Bacteroides heparinolyticus F0111, Bacteroides ovatus V975, Bacteroides ovatus 3725 D1 iv, Bacteroides ovatus ATCC 8483, Bacteroides intestinalis APC919/174, Bacteroides dorei, Bacteroides dorei CL03T12C01, Bacteroides xylanisolvens H207, Bacteroides caccae ATCC 43185, Bacteroides thetaiotaomicron 7330, Bacteroide…	Degradation.C1-COMPOUNDS.Formaldehyde-Oxidation.PWY-7909.
18	methanol oxidation to formaldehyde II	2/75	1.0	1	Bacteroides	Bacteroides reticulotermitis JCM 10512, Bacteroides xylanisolvens XB1A	Degradation.C1-COMPOUNDS.Methanol-Oxidation.PWY-6510.
19	NAD salvage pathway IV (from nicotinamide riboside)	1/75	0.5	1	Bacteroides	Bacteroides reticulotermitis JCM 10512	Biosynthesis.Cofactor-Biosynthesis.NAD-Metabolism.NAD-SYN.PWY3O-4106.
20	ammonium transport	5/75	1.0	1	Bacteroides	Bacteroides reticulotermitis JCM 10512, Bacteroides helcogenes P 36-108, Bacteroides xylanisolvens XB1A, Bacteroides thetaiotaomicron VPI-5482, Bacteroides vulgatus ATCC 8482	Transport-PWY-5986/Degradation.Noncarbon-Nutrients.NITROGEN-DEG
21	sphingomyelin metabolism	1/75	0.33	0.33	Bacteroides	Bacteroides helcogenes P 36-108	Biosynthesis.Lipid-Biosynthesis.PWY3DJ-11281.
22	N-end rule pathway I (prokaryotic)	7/75	1.0	1	Bacteroides	Bacteroides cellulosilyticus WH2, Bacteroides sp. A1C1, Bacteroides intestinalis APC919/174, Bacteroides dorei, Bacteroides dorei CL03T12C01, Bacteroides uniformis NBRC 113350, Bacteroides vulgatus VIC01	Macromolecule-Modification.Protein-Modification.PWY-7801./Metabolic-Clusters.PWY-7801.
23	2-amino-3-carboxymuconate semialdehyde degradation to 2-hydroxypentadienoate	1/75	0.25	0.25	Bacteroides	Bacteroides helcogenes P 36-108	Degradation.CARBOXYLATES-DEG.PWY-5654.
24	pseudouridine degradation	3/75	0.5	0.5	Bacteroides	Bacteroides helcogenes P 36-108, Bacteroides xylanisolvens XB1A, Bacteroides salanitronis DSM 18170	Degradation.NUCLEO-DEG.Purine-Degradation.PWY-6019.
25	kojibiose degradation	1/75	1.0	1	Bacteroides	Bacteroides salanitronis DSM 18170	Degradation.Carbohydrates-Degradation.Sugars-And-Polysaccharides-Degradation.PWY-7459.
26	mannitol degradation II	1/75	1.0	1.33	Bacteroides	Bacteroides ovatus SD CC 2a	Degradation.SECONDARY-METABOLITE-DEGRADATION.Sugar-Derivatives.SUGAR-ALCOHOLS-DEG.PWY-3861./Degradation.Carbohydrates-Degradation.Sugars-And-Polysaccharides-Degradation.PWY-3861.
27	alginate degradation	2/75	0.17	0.17	Bacteroides	Bacteroides cellulosilyticus WH2, Bacteroides intestinalis APC919/174	Degradation.Polymer-Degradation.POLYSACCHARIDES-DEG.PWY-6986./Degradation.Carbohydrates-Degradation.POLYSACCHARIDES-DEG.PWY-6986.
28	&beta;-1,4-D-mannosyl-N-acetyl-D-glucosamine degradation	1/75	0.67	0.67	Bacteroides	Bacteroides thetaiotaomicron 7330	Degradation.Carbohydrates-Degradation.PWY-7586.
29	cellulose and hemicellulose degradation (cellulolosome)	1/75	0.67	0.67	Bacteroides	Bacteroides salanitronis DSM 18170	Degradation.Polymer-Degradation.POLYSACCHARIDES-DEG.Cellulose-Degradation.PWY-6784./Degradation.Carbohydrates-Degradation.POLYSACCHARIDES-DEG.Cellulose-Degradation.PWY-6784./Metabolic-Clusters.PWY-6784.
30	L-ornithine biosynthesis II	2/75	1.0	1.08	Bacteroides	Bacteroides dorei CL03T12C01, Bacteroides vulgatus ATCC 8482	Biosynthesis.Amino-Acid-Biosynthesis.Other-Amino-Acid-Biosynthesis.L-Ornithine-Biosynthesis.ARGININE-SYN4-PWY.
31	homogalacturonan degradation	5/75	1.0	4.5	Bacteroides	Bacteroides reticulotermitis JCM 10512, Bacteroides ovatus SD CMC 3f, Bacteroides xylanisolvens XB1A, Bacteroides thetaiotaomicron VPI-5482, Bacteroides vulgatus ATCC 8482	Glycan-Glycan-Degradation.PWY-1081./Degradation.Polymer-Degradation.POLYSACCHARIDES-DEG.Glycan-Degradation.PWY-1081./Degradation.Polymer-Degradation.POLYSACCHARIDES-DEG.Pectin-Degradation.PWY-1081./Degradation.Carbohydrates-Degradation.POLYSACCHARIDES-DEG.Glycan-Degradation.PWY-1081./Degradation.Carbohydrates-Degradation.POLYSACCHARIDES-DEG.Pectin-Degradation.PWY-1081.
32	glucuronoarabinoxylan degradation	1/75	1.0	1	Bacteroides	Bacteroides vulgatus ATCC 8482	Glycan-PWY-6813./Degradation.Polymer-Degradation.POLYSACCHARIDES-DEG.PWY-6813./Degradation.Carbohydrates-Degradation.POLYSACCHARIDES-DEG.PWY-6813.
33	S-methyl-5'-thioadenosine degradation II	1/75	1.0	1	Bacteroides	Bacteroides reticulotermitis JCM 10512	Degradation.NUCLEO-DEG.Methylthioadenosine-Degradation.PWY-6756.
34	cardiolipin biosynthesis II	1/75	1.0	1	Bacteroides	Bacteroides reticulotermitis JCM 10512	Biosynthesis.Lipid-Biosynthesis.Phospholipid-Biosynthesis.Cardiolipin-Biosynthesis.PWY-5269.
35	acetoin degradation	1/75	1.0	1	Bacteroides	Bacteroides reticulotermitis JCM 10512	Degradation.Carbohydrates-Degradation.PWY-6028.
36	glycogen degradation I	1/75	1.0	2	Bacteroides	Bacteroides reticulotermitis JCM 10512	Glycan-Glycan-Degradation.GLYCOCAT-PWY./Degradation.Polymer-Degradation.POLYSACCHARIDES-DEG.Glycan-Degradation.GLYCOCAT-PWY./Degradation.Polymer-Degradation.POLYSACCHARIDES-DEG.Glycogen-Degradation.GLYCOCAT-PWY./Degradation.Carbohydrates-Degradation.POLYSACCHARIDES-DEG.Glycan-Degradation.GLYCOCAT-PWY./Degradation.Carbohydrates-Degradation.POLYSACCHARIDES-DEG.Glycogen-Degradation.GLYCOCAT-PWY.
37	heparan sulfate degradation	5/75	0.33	0.33	Bacteroides	Bacteroides caecimuris I48, Bacteroides cellulosilyticus WH2, Bacteroides heparinolyticus F0111, Bacteroides ovatus 3725 D1 iv, Bacteroides thetaiotaomicron 7330	Degradation.Polymer-Degradation.POLYSACCHARIDES-DEG.Glycosaminoglycan-Degradation.PWY-7651./Degradation.Carbohydrates-Degradation.POLYSACCHARIDES-DEG.Glycosaminoglycan-Degradation.PWY-7651.
38	lipoate salvage II	3/75	0.5	0.5	Bacteroides	Bacteroides cellulosilyticus WH2, Bacteroides dorei, Bacteroides dorei CL03T12C01	Biosynthesis.Cofactor-Biosynthesis.Lipoate-Biosynthesis.PWY-6984.
39	methanol oxidation to formaldehyde I	1/75	1.0	1	Bacteroides	Bacteroides reticulotermitis JCM 10512	Degradation.C1-COMPOUNDS.Methanol-Oxidation.PWY-6966.

## Sheet: Cancer-incr_Firmicutes_Pathways
No.	Metabolic.Pathway	Present.in.X.org..Total.org.	Median.score	Median.frequency	Metabolite	Reaction	Enzyme	EC.Number	Class	Target.taxonomies	Strain.with.the.Pathway	Pathway.Hierarchy	MetaCyc.URL
1	S-methyl-5'-thioadenosine degradation III	1/714	0.5	0.5	NA	NA	NA	NA	NA	Acidaminococcus intestini RyC-MR95	Acidaminococcus intestini RyC-MR95	Degradation.NUCLEO-DEG.Methylthioadenosine-Degradation.PWY-6753.	https://metacyc.org/META/new-image?type=PATHWAY&object=PWY-6753
2	muropeptide degradation	22/714	0.5	0.5	NA	NA	NA	NA	NA	Acidaminococcus intestini RyC-MR95, Lactobacillus	Lactobacillus acidophilus La-14, Lactobacillus acidophilus FSI4, Lactobacillus acidophilus ATCC 53544, Lactobacillus acidophilus LA1, Lactobacillus acidophilus DSM 20079, Lactobacillus acidophilus YT1, Lactobacillus delbrueckii subsp. bulgaricus MN-BM-F01, Lactobacillus delbrueckii subsp. bulgaricus DSM 20080, Lactobacillus delbrueckii subsp. bulgaricus KLDS1.0207, Lactobacillus delbrueckii subsp…	Degradation.Polymer-Degradation.PWY0-1546.	https://metacyc.org/META/new-image?type=PATHWAY&object=PWY0-1546
3	NAD salvage pathway II (PNC IV cycle)	22/714	0.75	0.75	NA	NA	NA	NA	NA	Acidaminococcus intestini RyC-MR95, Selenomonas, Lactobacillus	Selenomonas ruminantium subsp. lactilytica TAM6421, Lactobacillus plantarum KP, Lactobacillus plantarum DF, Lactobacillus plantarum RI-113, Lactobacillus plantarum LP2, Lactobacillus plantarum TMW 1.1623, Lactobacillus plantarum dm, Lactobacillus plantarum BDGP2, Lactobacillus plantarum PC520, Lactobacillus plantarum SK151, Lactobacillus plantarum nF1, Lactobacillus plantarum TMW 1.1478, Lactobac…	Biosynthesis.Cofactor-Biosynthesis.NAD-Metabolism.NAD-SYN.PWY-7761.	https://metacyc.org/META/new-image?type=PATHWAY&object=PWY-7761
4	cadaverine biosynthesis	11/714	1.0	1	NA	NA	NA	NA	NA	Acidaminococcus intestini RyC-MR95, Selenomonas, Lactobacillus, Enterococcus	Enterococcus faecium DO, Enterococcus gallinarum FDAARGOS_163, Enterococcus sp. CR-Ec1, Enterococcus sp. FDAARGOS_375, Enterococcus casseliflavus EC-369, Enterococcus casseliflavus EC20, Selenomonas ruminantium subsp. lactilytica TAM6421, Lactobacillus gasseri 4M13, Lactobacillus paracasei N1115, Lactobacillus paracasei CAUH35, Acidaminococcus intestini RyC-MR95	Detoxification.Acid-Resistance.PWY0-1601./Biosynthesis.Polyamine-Biosynthesis.PWY0-1601.	https://metacyc.org/META/new-image?type=PATHWAY&object=PWY0-1601
5	lipid IVA biosynthesis	12/714	0.67	0.67	NA	NA	NA	NA	NA	Acidaminococcus intestini RyC-MR95, Selenomonas, Megasphaera, Dialister pneumosintes, Selenomonas sputigena	Selenomonas sp. oral taxon 920 W5150, Selenomonas sputigena ATCC 35185, Selenomonas sp. oral taxon 478 F0592, Selenomonas sp. oral taxon 136 F0591, Selenomonas ruminantium subsp. lactilytica TAM6421, Dialister pneumosintes F0677, Acidaminococcus intestini RyC-MR95, Megasphaera hexanoica MH, Megasphaera stantonii AJH120, Megasphaera elsdenii DSM 20460, Megasphaera elsdenii 14-14, Megasphaera elsde…	Biosynthesis.Lipid-Biosynthesis.NAGLIPASYN-PWY./Biosynthesis.Cell-Structure-Biosynthesis.Lipopolysaccharide-Biosynthesis.NAGLIPASYN-PWY.	https://metacyc.org/META/new-image?type=PATHWAY&object=NAGLIPASYN-PWY
6	glycerol-3-phosphate shuttle	1/714	1.0	1	NA	NA	NA	NA	NA	Christensenella	Christensenella minuta DSM 22607	Energy-Metabolism.OTHER-ENERGY.PWY-6118.	https://metacyc.org/META/new-image?type=PATHWAY&object=PWY-6118
7	vancomycin resistance II	8/714	0.33	0.33	NA	NA	NA	NA	NA	Christensenella, Enterococcus	Christensenella sp. Marseille-P3954, Enterococcus faecium 16-346, Enterococcus gallinarum FDAARGOS_163, Enterococcus sp. CR-Ec1, Enterococcus sp. FDAARGOS_375, Enterococcus sp. FDAARGOS_553, Enterococcus sp. M190262, Enterococcus casseliflavus EC20	Detoxification.Antibiotic-Resistance.Vancomycin-Resistnace.PWY-6455./Biosynthesis.Cell-Structure-Biosynthesis.Cell-Wall-Biosynthesis.PWY-6455.	https://metacyc.org/META/new-image?type=PATHWAY&object=PWY-6455
8	L-glutamate degradation IX (via 4-aminobutanoate)	233/714	1.0	1	NA	NA	NA	NA	NA	Christensenella, Enterococcus, Parvimonas micra, Lactobacillus, Lactococcus, Parvimonas, Mogibacterium	Christensenella minuta DSM 22607, Enterococcus faecium 2014-VREF-41, Enterococcus faecium 16-346, Enterococcus faecium WEFA23, Enterococcus faecium AUSMDU00004167, Enterococcus faecium 6E6, Enterococcus faecium FSIS1608820, Enterococcus faecium UW8175, Enterococcus faecium VB3240, Enterococcus faecium QU 50, Enterococcus faecium FA3, Enterococcus faecium DMEA02, Enterococcus faecium V1836, Entero…	Degradation.Amino-Acid-Degradation.Proteinogenic-Amino-Acids-Degradation.GLUTAMATE-DEG.PWY0-1305./Detoxification.Acid-Resistance.PWY0-1305.	https://metacyc.org/META/new-image?type=PATHWAY&object=PWY0-1305
9	GABA shunt	2/714	1.0	1.17	NA	NA	NA	NA	NA	Christensenella, Lactobacillus	Christensenella minuta DSM 22607, Lactobacillus plantarum 4_3	Degradation.Amino-Acid-Degradation.Proteinogenic-Amino-Acids-Degradation.GLUTAMATE-DEG.GLUDEG-I-PWY./Degradation.AMINE-DEG.4-Aminobutyraye-Degradation.GLUDEG-I-PWY./Super-GLUDEG-I-PWY.	https://metacyc.org/META/new-image?type=PATHWAY&object=/Super-GLUDEG-I-PWY
10	NAD phosphorylation and transhydrogenation	13/714	1.0	2	NA	NA	NA	NA	NA	Christensenella, Lactobacillus	Christensenella sp. Marseille-P3954, Lactobacillus hokkaidonensis JCM 18461, Lactobacillus nenjiangensis SH-Y15, Lactobacillus parabuchneri FAM21731, Lactobacillus buchneri CD034, Lactobacillus buchneri MGB0786, Lactobacillus buchneri NRRL B-30929, Lactobacillus malefermentans CBA3618, Lactobacillus paracollinoides TMW 1.1979, Lactobacillus paracollinoides TMW 1.1995, Lactobacillus paracollinoide…	Biosynthesis.Cofactor-Biosynthesis.NAD-Metabolism.NADPHOS-DEPHOS-PWY-1.	https://metacyc.org/META/new-image?type=PATHWAY&object=NADPHOS-DEPHOS-PWY-1
11	4-aminobutanoate degradation II	76/714	0.5	0.5	NA	NA	NA	NA	NA	Christensenella, Lactobacillus, Enterococcus	Christensenella minuta DSM 22607, Enterococcus hirae ATCC 9790, Enterococcus mundtii QU 25, Enterococcus malodoratus ATCC 43197, Lactobacillus jensenii 115-3-CHN, Lactobacillus acidophilus La-14, Lactobacillus acidophilus FSI4, Lactobacillus acidophilus ATCC 53544, Lactobacillus acidophilus LA1, Lactobacillus acidophilus DSM 20079, Lactobacillus brevis EW, Lactobacillus brevis AG48, Lactobacillus…	Degradation.AMINE-DEG.4-Aminobutyraye-Degradation.PWY-6537.	https://metacyc.org/META/new-image?type=PATHWAY&object=PWY-6537
12	4-aminobutanoate degradation I	52/714	1.0	1	NA	NA	NA	NA	NA	Christensenella, Lactobacillus, Enterococcus	Christensenella minuta DSM 22607, Enterococcus hirae ATCC 9790, Enterococcus mundtii QU 25, Lactobacillus ginsenosidimutans EMML 3041, Lactobacillus heilongjiangensis DSM 28069, Lactobacillus curieae CCTCC M 2011381, Lactobacillus hokkaidonensis JCM 18461, Lactobacillus parabuchneri FAM21731, Lactobacillus pentosus SLC13, Lactobacillus pentosus DSM 20314, Lactobacillus plantarum 4_3, Lactobacillu…	Degradation.AMINE-DEG.4-Aminobutyraye-Degradation.PWY-6535.	https://metacyc.org/META/new-image?type=PATHWAY&object=PWY-6535
13	4-aminobutanoate degradation III	85/714	0.5	0.5	NA	NA	NA	NA	NA	Christensenella, Selenomonas, Lactobacillus, Megasphaera, Lactococcus	Christensenella minuta DSM 22607, Selenomonas ruminantium subsp. lactilytica TAM6421, Lactococcus raffinolactis WiKim0068, Lactobacillus ginsenosidimutans EMML 3041, Lactobacillus heilongjiangensis DSM 28069, Lactobacillus curieae CCTCC M 2011381, Lactobacillus hokkaidonensis JCM 18461, Lactobacillus kunkeei MP2, Lactobacillus parabuchneri FAM21731, Lactobacillus brevis subsp. gravesensis ATCC 27…	Degradation.AMINE-DEG.4-Aminobutyraye-Degradation.PWY-6536.	https://metacyc.org/META/new-image?type=PATHWAY&object=PWY-6536
14	hyaluronan degradation	10/714	0.5	0.5	NA	NA	NA	NA	NA	Enterococcus	Enterococcus faecium E745, Enterococcus faecium 2014-VREF-41, Enterococcus faecium K60-39, Enterococcus faecium A_020709_82, Enterococcus faecium AUSMDU00004167, Enterococcus faecium RBWH1, Enterococcus faecium VVEswe-R, Enterococcus faecium VVEswe-S, Enterococcus faecium V1836, Enterococcus faecium DO	Degradation.Polymer-Degradation.POLYSACCHARIDES-DEG.Glycosaminoglycan-Degradation.PWY-7645./Degradation.Carbohydrates-Degradation.POLYSACCHARIDES-DEG.Glycosaminoglycan-Degradation.PWY-7645.	https://metacyc.org/META/new-image?type=PATHWAY&object=PWY-7645
15	N-end rule pathway I (prokaryotic)	1/714	1.0	1	NA	NA	NA	NA	NA	Enterococcus	Enterococcus sp. CR-Ec1	Macromolecule-Modification.Protein-Modification.PWY-7801./Metabolic-Clusters.PWY-7801.	https://metacyc.org/META/new-image?type=PATHWAY&object=PWY-7801
16	ammonia oxidation I (aerobic)	27/714	0.5	0.5	NA	NA	NA	NA	NA	Enterococcus	Enterococcus faecalis ATCC 29212, Enterococcus faecalis D32, Enterococcus faecalis LD33, Enterococcus faecalis L12, Enterococcus faecalis CLB21560, Enterococcus faecalis FDAARGOS_338, Enterococcus faecium E745, Enterococcus faecium ISMMS_VRE_9, Enterococcus faecium A_020709_82, Enterococcus faecium E240, Enterococcus faecium E243, Enterococcus faecium E232, Enterococcus faecium Efaecium_ER03933.3…	Degradation.Noncarbon-Nutrients.NITROGEN-DEG.Ammonia-oxidation.AMMOXID-PWY./Energy-Metabolism.CHEMOAUTOTROPHIC-ENERGY-METABOLISM.AMMOXID-PWY.	https://metacyc.org/META/new-image?type=PATHWAY&object=AMMOXID-PWY
17	nylon-6 oligomer degradation	1/714	0.29	0.29	NA	NA	NA	NA	NA	Enterococcus	Enterococcus gallinarum FDAARGOS_163	Degradation.Other-Degradation.P621-PWY.	https://metacyc.org/META/new-image?type=PATHWAY&object=P621-PWY
18	cytidylyl molybdenum cofactor biosynthesis	39/714	1.0	1	NA	NA	NA	NA	NA	Enterococcus	Enterococcus faecalis EnGen0107, Enterococcus faecalis ATCC 29212, Enterococcus faecalis D32, Enterococcus faecalis str. Symbioflor 1, Enterococcus faecalis DENG1, Enterococcus faecalis FDAARGOS_324, Enterococcus faecalis TY1, Enterococcus faecalis FDAARGOS_528, Enterococcus faecalis KUB3006, Enterococcus faecalis KUB3007, Enterococcus faecalis CVM N48037F, Enterococcus faecalis CVM N60443F, Ente…	Biosynthesis.Cofactor-Biosynthesis.PWY-6476.	https://metacyc.org/META/new-image?type=PATHWAY&object=PWY-6476
19	oleate biosynthesis IV (anaerobic)	1/714	0.79	1.29	NA	NA	NA	NA	NA	Enterococcus	Enterococcus sp. CR-Ec1	Biosynthesis.Lipid-Biosynthesis.Fatty-acid-biosynthesis.Unsaturated-Fatty-Acids-Biosynthesis.Oleate-Biosynthesis.PWY-7664.	https://metacyc.org/META/new-image?type=PATHWAY&object=PWY-7664
20	malonate decarboxylase activation	3/714	1.0	1	NA	NA	NA	NA	NA	Enterococcus	Enterococcus faecium DO, Enterococcus durans ATCC 6056 ASWM, Enterococcus durans IPLA 655	Biosynthesis.Cofactor-Biosynthesis.PWY-5796.	https://metacyc.org/META/new-image?type=PATHWAY&object=PWY-5796
21	oxalate degradation V	1/714	1.0	1	NA	NA	NA	NA	NA	Enterococcus	Enterococcus gilvus ATCC BAA-350	Degradation.CARBOXYLATES-DEG.Oxalate-Degradation.PWY-6698.	https://metacyc.org/META/new-image?type=PATHWAY&object=PWY-6698
22	L-malate degradation II	150/714	1.0	1	NA	NA	NA	NA	NA	Enterococcus, Selenomonas, Lactobacillus, Lactococcus, Anaerococcus, Mogibacterium	Enterococcus faecium WEFA23, Enterococcus faecium SRCM103470, Enterococcus faecium F17E0263, Enterococcus faecium FB-1, Enterococcus faecium DO, Enterococcus hirae FDAARGOS_234, Enterococcus sp. CR-Ec1, Enterococcus sp. FDAARGOS_375, Enterococcus sp. DA9, Enterococcus durans KLDS6.0933, Enterococcus durans KLDS 6.0930, Enterococcus mundtii EMB156, Enterococcus mundtii Pe161, Selenomonas ruminanti…	Degradation.CARBOXYLATES-DEG.L-Malate-Degradation.PWY-7686.	https://metacyc.org/META/new-image?type=PATHWAY&object=PWY-7686
23	glutathione-glutaredoxin redox reactions	161/714	0.5	0.5	NA	NA	NA	NA	NA	Enterococcus, Turicibacter, Parvimonas micra, Selenomonas, Lactobacillus, Megasphaera, Lactococcus, Parvimonas, Acidaminococcus intestini RyC-MR95, Anaerococcus, Mogibacterium, Selenomonas sputigena	Enterococcus faecalis V583, Enterococcus hirae ATCC 9790, Enterococcus gilvus ATCC BAA-350, Enterococcus avium ATCC 14025, Enterococcus durans ATCC 6056 ASWM, Enterococcus durans IPLA 655, Enterococcus mundtii QU 25, Enterococcus mundtii CRL35, Enterococcus malodoratus ATCC 43197, Turicibacter sp. H121, Parvimonas micra KCOM 1037, Parvimonas micra NCTC11808, Parvimonas micra KCOM 1535; ChDC B708,…	Biosynthesis.Cofactor-Biosynthesis.Reductants.GLUT-REDOX-PWY.	https://metacyc.org/META/new-image?type=PATHWAY&object=GLUT-REDOX-PWY
24	2-oxoglutarate decarboxylation to succinyl-CoA	168/714	1.0	1.33	NA	NA	NA	NA	NA	Filifactor, Enterococcus, Lactobacillus, Megasphaera, Lactococcus, Acidaminococcus intestini RyC-MR95	Enterococcus faecalis str. Symbioflor 1, Enterococcus faecalis DENG1, Enterococcus faecalis FDAARGOS_324, Enterococcus faecalis LD33, Enterococcus faecalis NCTC8732, Enterococcus faecalis, Enterococcus faecalis FDAARGOS_338, Enterococcus faecalis V583, Enterococcus faecium ATCC 8459 = NRRL B-2354, Enterococcus faecium Aus0085, Enterococcus faecium T110, Enterococcus faecium E745, Enterococcus fae…	Energy-Metabolism.Respiration.PWY-5084.	https://metacyc.org/META/new-image?type=PATHWAY&object=PWY-5084
25	L-rhamnose degradation II	1/714	0.11	0.11	NA	NA	NA	NA	NA	Lactobacillus	Lactobacillus brevis subsp. gravesensis ATCC 27305	Degradation.Carbohydrates-Degradation.Sugars-And-Polysaccharides-Degradation.L-rhamnose-Degradation.PWY-6713.	https://metacyc.org/META/new-image?type=PATHWAY&object=PWY-6713
26	limonene degradation II (L-limonene)	1/714	0.14	0.14	NA	NA	NA	NA	NA	Lactobacillus	Lactobacillus plantarum LQ80	Degradation.SECONDARY-METABOLITE-DEGRADATION.TERPENOID-DEG.Limonene-Degradation.PWY-5924.	https://metacyc.org/META/new-image?type=PATHWAY&object=PWY-5924
27	dTDP-L-mycarose biosynthesis	22/714	0.14	0.14	NA	NA	NA	NA	NA	Lactobacillus	Lactobacillus brevis TMW 1.2113, Lactobacillus brevis TMW 1.2108, Lactobacillus brevis TMW 1.2111, Lactobacillus brevis 100D8, Lactobacillus brevis SRCM101174, Lactobacillus brevis SRCM101106, Lactobacillus brevis subsp. gravesensis ATCC 27305, Lactobacillus plantarum ZJ316, Lactobacillus plantarum WJL, Lactobacillus plantarum EGD-AQ4, Lactobacillus plantarum subsp. plantarum ST-III, Lactobacillu…	Biosynthesis.Carbohydrates-Biosynthesis.CARBO-BIOSYNTHESIS.SUGAR-NUCLEOTIDES.dTDP-Sugar-Biosynthesis.PWY-6976.	https://metacyc.org/META/new-image?type=PATHWAY&object=PWY-6976
28	pyruvate to cytochrome bd oxidase electron transfer	2/714	1.0	2.5	NA	NA	NA	NA	NA	Lactobacillus	Lactobacillus paracasei subsp. paracasei JCM 8130, Lactobacillus paracasei KL1	Energy-Metabolism.Respiration.AEROBIC-RESPIRATION.PWY-7545./Energy-Metabolism.Electron-Transfer.PWY-7545.	https://metacyc.org/META/new-image?type=PATHWAY&object=PWY-7545
29	glycolysis II (from fructose 6-phosphate)	1/714	0.6	1.2	NA	NA	NA	NA	NA	Lactobacillus	Lactobacillus fermentum F-6	Energy-Metabolism.GLYCOLYSIS-VARIANTS.PWY-5484.	https://metacyc.org/META/new-image?type=PATHWAY&object=PWY-5484
30	D-arginine degradation	2/714	0.5	0.5	NA	NA	NA	NA	NA	Lactobacillus	Lactobacillus brevis SRCM101174, Lactobacillus brevis SRCM101106	Degradation.Amino-Acid-Degradation.MISCELLANEOUS-DEG.D-Amino-Acid-Degradation.PWY-6422.	https://metacyc.org/META/new-image?type=PATHWAY&object=PWY-6422
31	thiazole biosynthesis II (aerobic bacteria)	34/714	0.57	1.43	NA	NA	NA	NA	NA	Lactobacillus	Lactobacillus parabuchneri FAM21731, Lactobacillus buchneri CD034, Lactobacillus buchneri MGB0786, Lactobacillus buchneri NRRL B-30929, Lactobacillus hilgardii LH500, Lactobacillus plantarum KP, Lactobacillus plantarum DF, Lactobacillus plantarum LP2, Lactobacillus plantarum BLS41, Lactobacillus plantarum TMW 1.708, Lactobacillus plantarum dm, Lactobacillus plantarum BDGP2, Lactobacillus plantaru…	Biosynthesis.Cofactor-Biosynthesis.Vitamin-Biosynthesis.Thiamine-Biosynthesis.Thiazole-Biosynthesis.PWY-6891.	https://metacyc.org/META/new-image?type=PATHWAY&object=PWY-6891
32	perchlorate reduction	1/714	0.5	0.5	NA	NA	NA	NA	NA	Lactobacillus	Lactobacillus plantarum UCMA 3037	Energy-Metabolism.Respiration.ANAEROBIC-RESPIRATION.PWY-6530.	https://metacyc.org/META/new-image?type=PATHWAY&object=PWY-6530
33	2,4-dichlorotoluene degradation	6/714	0.22	0.22	NA	NA	NA	NA	NA	Lactobacillus	Lactobacillus delbrueckii subsp. bulgaricus DSM 20080, Lactobacillus delbrueckii subsp. bulgaricus L99, Lactobacillus delbrueckii subsp. bulgaricus KLDS1.0207, Lactobacillus delbrueckii subsp. bulgaricus KLDS1.1011, Lactobacillus delbrueckii subsp. bulgaricus, Lactobacillus delbrueckii subsp. bulgaricus 2038	Degradation.CHLORINATED-COMPOUNDS-DEG.Chloroaromatic-Compounds-Degradation.Chlorotoluene-Degradation.Dichlorotoluene-Degradation.PWY-6190./Degradation.AROMATIC-COMPOUNDS-DEGRADATION.Chloroaromatic-Compounds-Degradation.Chlorotoluene-Degradation.Dichlorotoluene-Degradation.PWY-6190.	https://metacyc.org/META/new-image?type=PATHWAY&object=PWY-6190
34	uracil degradation III	2/714	0.17	0.17	NA	NA	NA	NA	NA	Lactobacillus	Lactobacillus rhamnosus GG GG (ATCC 53103), Lactobacillus rhamnosus Lc 705	Degradation.NUCLEO-DEG.Pyrimidine-Degradation.Pyrimidine-Base-Degradation.Uracil-Degradation.PWY0-1471.	https://metacyc.org/META/new-image?type=PATHWAY&object=PWY0-1471
35	L-leucine degradation I	3/714	0.33	0.33	NA	NA	NA	NA	NA	Lactobacillus	Lactobacillus paracasei ATCC 334, Lactobacillus rhamnosus GG GG (ATCC 53103), Lactobacillus rhamnosus Lc 705	Degradation.Amino-Acid-Degradation.Proteinogenic-Amino-Acids-Degradation.LEUCINE-DEG.LEU-DEG2-PWY.	https://metacyc.org/META/new-image?type=PATHWAY&object=LEU-DEG2-PWY
36	L-phenylalanine degradation VI (Stickland reaction)	1/714	0.2	0.2	NA	NA	NA	NA	NA	Lactobacillus	Lactobacillus kullabergensis ESL0186	Degradation.Amino-Acid-Degradation.Proteinogenic-Amino-Acids-Degradation.PHENYLALANINE-DEG.PWY-8014.	https://metacyc.org/META/new-image?type=PATHWAY&object=PWY-8014
37	oxalate degradation III	2/714	0.2	0.5	NA	NA	NA	NA	NA	Lactobacillus	Lactobacillus reuteri SD2112, Lactobacillus reuteri CF48-3A	Degradation.CARBOXYLATES-DEG.Oxalate-Degradation.PWY-6696.	https://metacyc.org/META/new-image?type=PATHWAY&object=PWY-6696
38	2-amino-3-carboxymuconate semialdehyde degradation to 2-hydroxypentadienoate	3/714	0.25	0.25	NA	NA	NA	NA	NA	Lactobacillus	Lactobacillus acidophilus NCFM, Lactobacillus helveticus H10, Lactobacillus malefermentans KCTC 3548	Degradation.CARBOXYLATES-DEG.PWY-5654.	https://metacyc.org/META/new-image?type=PATHWAY&object=PWY-5654
39	arsenite oxidation I (respiratory)	14/714	0.5	0.5	NA	NA	NA	NA	NA	Lactobacillus	Lactobacillus delbrueckii subsp. sunkii, Lactobacillus delbrueckii subsp. jakobsenii ZN7a-9 = DSM 26046, Lactobacillus delbrueckii subsp. indicus, Lactobacillus delbrueckii subsp. lactis KCCM 34717, Lactobacillus delbrueckii subsp. lactis KCTC 3035, Lactobacillus delbrueckii subsp. lactis KCTC 3034, Lactobacillus helveticus MB2-1, Lactobacillus amylovorus DSM 20531, Lactobacillus mali LM596, Lact…	Detoxification.Arsenate-Detoxification.PWY-4521./Energy-Metabolism.Respiration.AEROBIC-RESPIRATION.PWY-4521./Energy-Metabolism.CHEMOAUTOTROPHIC-ENERGY-METABOLISM.PWY-4521./Energy-Metabolism.Electron-Transfer.PWY-4521.	https://metacyc.org/META/new-image?type=PATHWAY&object=PWY-4521
40	glyphosate degradation II	26/714	1.0	1	NA	NA	NA	NA	NA	Lactobacillus	Lactobacillus plantarum KP, Lactobacillus plantarum DF, Lactobacillus plantarum LP2, Lactobacillus plantarum BLS41, Lactobacillus plantarum TMW 1.708, Lactobacillus plantarum dm, Lactobacillus plantarum BDGP2, Lactobacillus plantarum PC520, Lactobacillus plantarum K259, Lactobacillus plantarum LM1004, Lactobacillus plantarum KC28, Lactobacillus plantarum, Lactobacillus plantarum SK151, Lactobacil…	Degradation.Noncarbon-Nutrients.Phosphorus-Compounds.Glyphosate-Degradation.PWY-7806.	https://metacyc.org/META/new-image?type=PATHWAY&object=PWY-7806
41	pyrimidine ribonucleosides salvage III	15/714	1.0	1	NA	NA	NA	NA	NA	Lactobacillus	Lactobacillus brevis UCCLBBS124, Lactobacillus brevis SA-C12, Lactobacillus brevis UCCLB556, Lactobacillus brevis UCCLB95, Lactobacillus brevis UCCLBBS449, Lactobacillus brevis UCCLB521, Lactobacillus reuteri, Lactobacillus reuteri WHH1689, Lactobacillus reuteri YSJL-12, Lactobacillus reuteri LL7, Lactobacillus animalis LL1, Lactobacillus coryniformis CBA3616, Lactobacillus fermentum 2760, Lactob…	Degradation.NUCLEO-DEG.Pyrimidine-Degradation.Pyrimidine-Ribonucleosides-Degradation.PWY-7195./Biosynthesis.Nucleotide-Biosynthesis.PYR-NUC-SYN.Pyrimidine-Nucleotide-Salvage.PWY-7195.	https://metacyc.org/META/new-image?type=PATHWAY&object=PWY-7195
42	limonene degradation I (D-limonene)	1/714	0.14	0.14	NA	NA	NA	NA	NA	Lactobacillus	Lactobacillus plantarum LQ80	Degradation.SECONDARY-METABOLITE-DEGRADATION.TERPENOID-DEG.Limonene-Degradation.PWY-5923.	https://metacyc.org/META/new-image?type=PATHWAY&object=PWY-5923
43	L-arginine degradation VII (arginase 3 pathway)	3/714	1.0	1.5	NA	NA	NA	NA	NA	Lactobacillus	Lactobacillus fermentum IFO 3956, Lactobacillus fermentum CECT 5716, Lactobacillus fermentum F-6	Degradation.Amino-Acid-Degradation.Proteinogenic-Amino-Acids-Degradation.ARGININE-DEG.ARG-GLU-PWY.	https://metacyc.org/META/new-image?type=PATHWAY&object=ARG-GLU-PWY
44	trehalose degradation VI (periplasmic)	4/714	1.0	2	NA	NA	NA	NA	NA	Lactobacillus	Lactobacillus plantarum ZJ316, Lactobacillus plantarum X7021, Lactobacillus plantarum YW11, Lactobacillus plantarum SRCM103361	Degradation.Carbohydrates-Degradation.Sugars-And-Polysaccharides-Degradation.Trehalose-Degradation.PWY0-1466.	https://metacyc.org/META/new-image?type=PATHWAY&object=PWY0-1466
45	sulfoacetaldehyde degradation III	1/714	1.0	1	NA	NA	NA	NA	NA	Lactobacillus	Lactobacillus brevis SRCM101174	Degradation.Noncarbon-Nutrients.Sulfur-Metabolism.Sulfoacetaldehyde-Degradation.PWY-6718.	https://metacyc.org/META/new-image?type=PATHWAY&object=PWY-6718
46	protein citrullination	1/714	1.0	1	NA	NA	NA	NA	NA	Lactobacillus	Lactobacillus fuchuensis DSM 14340 JCM 11249	Biosynthesis.Amino-Acid-Biosynthesis.Amino-Acids-Modification.PWY-4921./Biosynthesis.Amino-Acid-Biosynthesis.Other-Amino-Acid-Biosynthesis.Citrulline-Biosynthesis.PWY-4921.	https://metacyc.org/META/new-image?type=PATHWAY&object=PWY-4921
47	dTDP-L-olivose biosynthesis	22/714	0.17	0.17	NA	NA	NA	NA	NA	Lactobacillus	Lactobacillus brevis TMW 1.2113, Lactobacillus brevis TMW 1.2108, Lactobacillus brevis TMW 1.2111, Lactobacillus brevis 100D8, Lactobacillus brevis SRCM101174, Lactobacillus brevis SRCM101106, Lactobacillus brevis subsp. gravesensis ATCC 27305, Lactobacillus plantarum ZJ316, Lactobacillus plantarum WJL, Lactobacillus plantarum EGD-AQ4, Lactobacillus plantarum subsp. plantarum ST-III, Lactobacillu…	Biosynthesis.Carbohydrates-Biosynthesis.CARBO-BIOSYNTHESIS.SUGAR-NUCLEOTIDES.dTDP-Sugar-Biosynthesis.PWY-6974.	https://metacyc.org/META/new-image?type=PATHWAY&object=PWY-6974
48	mannosylglycerate biosynthesis I	1/714	0.5	0.5	NA	NA	NA	NA	NA	Lactobacillus	Lactobacillus curvatus MRS6	Biosynthesis.Metabolic-Regulators.Organic-solutes-Biosynthesis.Mannosylglycerate-Biosynthesis.PWY-5656.	https://metacyc.org/META/new-image?type=PATHWAY&object=PWY-5656
49	5-chloro-3-methyl-catechol degradation	6/714	0.25	0.25	NA	NA	NA	NA	NA	Lactobacillus	Lactobacillus delbrueckii subsp. bulgaricus DSM 20080, Lactobacillus delbrueckii subsp. bulgaricus L99, Lactobacillus delbrueckii subsp. bulgaricus KLDS1.0207, Lactobacillus delbrueckii subsp. bulgaricus KLDS1.1011, Lactobacillus delbrueckii subsp. bulgaricus, Lactobacillus delbrueckii subsp. bulgaricus 2038	Degradation.CHLORINATED-COMPOUNDS-DEG.Chloroaromatic-Compounds-Degradation.PWY-6102./Degradation.AROMATIC-COMPOUNDS-DEGRADATION.Chloroaromatic-Compounds-Degradation.PWY-6102.	https://metacyc.org/META/new-image?type=PATHWAY&object=PWY-6102
50	diphenyl ethers degradation	2/714	0.25	0.25	NA	NA	NA	NA	NA	Lactobacillus	Lactobacillus paracasei N1115, Lactobacillus paracasei KL1	Degradation.AROMATIC-COMPOUNDS-DEGRADATION.PWY-7747.	https://metacyc.org/META/new-image?type=PATHWAY&object=PWY-7747
51	sophorosyloxydocosanoate deacetylation	1/714	1.0	1	NA	NA	NA	NA	NA	Lactobacillus	Lactobacillus acidipiscis KCTC 13900	Degradation.Fatty-Acid-and-Lipid-Degradation.SOPHOROSYLOXYDOCOSANOATE-DEG-PWY.	https://metacyc.org/META/new-image?type=PATHWAY&object=SOPHOROSYLOXYDOCOSANOATE-DEG-PWY
52	chlorate reduction	1/714	0.5	0.5	NA	NA	NA	NA	NA	Lactobacillus	Lactobacillus plantarum UCMA 3037	Energy-Metabolism.Respiration.ANAEROBIC-RESPIRATION.PWY-6529.	https://metacyc.org/META/new-image?type=PATHWAY&object=PWY-6529
53	Ac/N-end rule pathway	1/714	1.0	1	NA	NA	NA	NA	NA	Lactobacillus	Lactobacillus buchneri CD034	Macromolecule-Modification.Protein-Modification.PWY-7800./Metabolic-Clusters.PWY-7800.	https://metacyc.org/META/new-image?type=PATHWAY&object=PWY-7800
54	pyruvate to cytochrome bo oxidase electron transfer	2/714	1.0	2	NA	NA	NA	NA	NA	Lactobacillus	Lactobacillus paracasei subsp. paracasei JCM 8130, Lactobacillus paracasei KL1	Energy-Metabolism.Respiration.AEROBIC-RESPIRATION.PWY-7544./Energy-Metabolism.Electron-Transfer.PWY-7544.	https://metacyc.org/META/new-image?type=PATHWAY&object=PWY-7544
55	histamine biosynthesis	8/714	1.0	1	NA	NA	NA	NA	NA	Lactobacillus	Lactobacillus reuteri I5007, Lactobacillus reuteri, Lactobacillus reuteri MM4-1A, Lactobacillus reuteri JCM 1112, Lactobacillus reuteri DSM 20016, Lactobacillus reuteri MM2-3, Lactobacillus fructivorans LF543, Lactobacillus vaginalis LV515	Biosynthesis.Polyamine-Biosynthesis.PWY-6173.	https://metacyc.org/META/new-image?type=PATHWAY&object=PWY-6173
56	4-chloronitrobenzene degradation	11/714	0.22	0.22	NA	NA	NA	NA	NA	Lactobacillus	Lactobacillus frumenti LF145, Lactobacillus nenjiangensis SH-Y15, Lactobacillus buchneri MGB0786, Lactobacillus plantarum IRG1, Lactobacillus plantarum subsp. plantarum TS12, Lactobacillus reuteri YSJL-12, Lactobacillus reuteri LL7, Lactobacillus fermentum 2760, Lactobacillus fermentum DR9, Lactobacillus sp. BHWM-4, Lactobacillus hordei TMW 1.1822	Degradation.AROMATIC-COMPOUNDS-DEGRADATION.Nitroaromatic-Degradation.Nitrobenzene-Degradation.PWY-5645.	https://metacyc.org/META/new-image?type=PATHWAY&object=PWY-5645
57	indole-3-acetate biosynthesis III (bacteria)	2/714	1.0	1	NA	NA	NA	NA	NA	Lactobacillus	Lactobacillus brevis SRCM101174, Lactobacillus brevis SRCM101106	Biosynthesis.HORMONE-SYN.Plant-Hormone-Biosynthesis.Auxin-Biosynthesis.PWY-3161.	https://metacyc.org/META/new-image?type=PATHWAY&object=PWY-3161
58	indole-3-acetate biosynthesis V (bacteria and fungi)	1/714	1.0	1	NA	NA	NA	NA	NA	Lactobacillus	Lactobacillus helveticus CNRZ32	Biosynthesis.HORMONE-SYN.Plant-Hormone-Biosynthesis.Auxin-Biosynthesis.PWY-5026.	https://metacyc.org/META/new-image?type=PATHWAY&object=PWY-5026
59	octopine degradation	2/714	1.0	1	NA	NA	NA	NA	NA	Lactobacillus	Lactobacillus casei BL23, Lactobacillus rhamnosus GG GG (ATCC 53103)	Degradation.SECONDARY-METABOLITE-DEGRADATION.N-CONTAINING-SECONDARY-CMPD-DEG.OCTOPINEDEG-PWY.	https://metacyc.org/META/new-image?type=PATHWAY&object=OCTOPINEDEG-PWY
60	L-arginine degradation I (arginase pathway)	1/714	0.25	0.5	NA	NA	NA	NA	NA	Lactobacillus	Lactobacillus acidophilus NCFM	Degradation.Amino-Acid-Degradation.Proteinogenic-Amino-Acids-Degradation.ARGININE-DEG.ARGASEDEG-PWY./Biosynthesis.Amino-Acid-Biosynthesis.IND-AMINO-ACID-SYN.GLUTAMATE-SYN.ARGASEDEG-PWY.	https://metacyc.org/META/new-image?type=PATHWAY&object=ARGASEDEG-PWY
61	homocysteine and cysteine interconversion	3/714	1.0	1.25	NA	NA	NA	NA	NA	Lactobacillus	Lactobacillus paracasei CAUH35, Lactobacillus paracasei IIA, Lactobacillus paracasei subsp. paracasei	Activation-Inactivation-Interconversion.Interconversion.PWY-801./Biosynthesis.Amino-Acid-Biosynthesis.IND-AMINO-ACID-SYN.CYSTEINE-SYN.PWY-801.	https://metacyc.org/META/new-image?type=PATHWAY&object=PWY-801
62	superpathway of adenosylcobalamin salvage from cobinamide I	2/714	1.0	1.17	NA	NA	NA	NA	NA	Lactobacillus	Lactobacillus reuteri SD2112, Lactobacillus reuteri mlc3	Super-COBALSYN-PWY./Biosynthesis.Cofactor-Biosynthesis.Vitamin-Biosynthesis.Cobalamin-Biosynthesis.Cobamide-Salvage.B12-Salvage-From-Cobinamide.COBALSYN-PWY.	https://metacyc.org/META/new-image?type=PATHWAY&object=COBALSYN-PWY
63	adenine and adenosine salvage VI	12/714	1.0	1	NA	NA	NA	NA	NA	Lactobacillus	Lactobacillus brevis KB290, Lactobacillus brevis BSO 464, Lactobacillus brevis NPS-QW-145, Lactobacillus brevis TMW 1.2113, Lactobacillus brevis TMW 1.2108, Lactobacillus brevis TMW 1.2111, Lactobacillus brevis 100D8, Lactobacillus brevis BDGP6, Lactobacillus brevis ATCC 367, Lactobacillus helveticus DPC 4571, Lactobacillus reuteri JCM 1112, Lactobacillus reuteri DSM 20016	Biosynthesis.Nucleotide-Biosynthesis.PUR-NUC-SYN.Purine-Nucleotides-Salvage.Adenine-Adenosine-Salvage.PWY-6619.	https://metacyc.org/META/new-image?type=PATHWAY&object=PWY-6619
64	stachyose degradation	11/714	1.0	2.14	NA	NA	NA	NA	NA	Lactobacillus	Lactobacillus paracasei HD1.7, Lactobacillus paracasei HDS-01, Lactobacillus paracasei LC355, Lactobacillus paracasei IJH-SONE68, Lactobacillus paracasei SRCM103299, Lactobacillus paracasei L9, Lactobacillus paracasei IIA, Lactobacillus sakei J64, Lactobacillus sakei MFPB16A1401, Lactobacillus salivarius DJ-sa-01, Lactobacillus johnsonii ZLJ010	Degradation.Carbohydrates-Degradation.Sugars-And-Polysaccharides-Degradation.PWY-6527.	https://metacyc.org/META/new-image?type=PATHWAY&object=PWY-6527
65	L-leucine degradation IV (Stickland reaction)	32/714	0.4	0.4	NA	NA	NA	NA	NA	Lactobacillus	Lactobacillus jensenii SNUV360, Lactobacillus hokkaidonensis JCM 18461, Lactobacillus kullabergensis ESL0186, Lactobacillus casei W56, Lactobacillus delbrueckii subsp. bulgaricus MN-BM-F01, Lactobacillus delbrueckii subsp. bulgaricus ND04, Lactobacillus delbrueckii subsp. indicus, Lactobacillus paracasei N1115, Lactobacillus paracasei FAM18149, Lactobacillus paracasei HD1.7, Lactobacillus paracas…	Degradation.Amino-Acid-Degradation.Proteinogenic-Amino-Acids-Degradation.LEUCINE-DEG.PWY-7767.	https://metacyc.org/META/new-image?type=PATHWAY&object=PWY-7767
66	quinate degradation I	2/714	0.33	0.33	NA	NA	NA	NA	NA	Lactobacillus	Lactobacillus iners DSM 13335, Lactobacillus gasseri 224-1	Degradation.AROMATIC-COMPOUNDS-DEGRADATION.Quinate-Degradation.QUINATEDEG-PWY.	https://metacyc.org/META/new-image?type=PATHWAY&object=QUINATEDEG-PWY
67	CO2 fixation into oxaloacetate (anaplerotic)	4/714	1.0	1	NA	NA	NA	NA	NA	Lactobacillus	Lactobacillus brevis subsp. gravesensis ATCC 27305, Lactobacillus delbrueckii subsp. bulgaricus ATCC BAA-365, Lactobacillus delbrueckii subsp. bulgaricus ATCC 11842 = JCM 1002, Lactobacillus helveticus DPC 4571	Degradation.C1-COMPOUNDS.CO2-Fixation.PWYQT-4429.	https://metacyc.org/META/new-image?type=PATHWAY&object=PWYQT-4429
68	kojibiose degradation	1/714	1.0	2	NA	NA	NA	NA	NA	Lactobacillus	Lactobacillus buchneri NRRL B-30929	Degradation.Carbohydrates-Degradation.Sugars-And-Polysaccharides-Degradation.PWY-7459.	https://metacyc.org/META/new-image?type=PATHWAY&object=PWY-7459
69	salicylate degradation III	5/714	1.0	1	NA	NA	NA	NA	NA	Lactobacillus	Lactobacillus brevis ATCC 14869 = DSM 20054, Lactobacillus rhamnosus ATCC 21052, Lactobacillus rhamnosus CASL, Lactobacillus rhamnosus LMS2-1, Lactobacillus rhamnosus R0011	Degradation.AROMATIC-COMPOUNDS-DEGRADATION.Salicylate-Degradation.PWY-6636.	https://metacyc.org/META/new-image?type=PATHWAY&object=PWY-6636
70	gallate biosynthesis	2/714	0.33	0.33	NA	NA	NA	NA	NA	Lactobacillus	Lactobacillus iners DSM 13335, Lactobacillus gasseri 224-1	Biosynthesis.AROMATIC-COMPOUNDS-BIOSYN.PWY-6707.	https://metacyc.org/META/new-image?type=PATHWAY&object=PWY-6707
71	benzene degradation	3/714	0.5	0.5	NA	NA	NA	NA	NA	Lactobacillus	Lactobacillus plantarum EGD-AQ4, Lactobacillus plantarum B21, Lactobacillus curvatus MRS6	Degradation.AROMATIC-COMPOUNDS-DEGRADATION.PWY-5450.	https://metacyc.org/META/new-image?type=PATHWAY&object=PWY-5450
72	dTDP-3-acetamido-&alpha;-D-fucose biosynthesis	22/714	0.2	0.2	NA	NA	NA	NA	NA	Lactobacillus	Lactobacillus brevis TMW 1.2113, Lactobacillus brevis TMW 1.2108, Lactobacillus brevis TMW 1.2111, Lactobacillus brevis 100D8, Lactobacillus brevis SRCM101174, Lactobacillus brevis SRCM101106, Lactobacillus brevis subsp. gravesensis ATCC 27305, Lactobacillus plantarum ZJ316, Lactobacillus plantarum WJL, Lactobacillus plantarum EGD-AQ4, Lactobacillus plantarum subsp. plantarum ST-III, Lactobacillu…	Biosynthesis.Carbohydrates-Biosynthesis.CARBO-BIOSYNTHESIS.SUGAR-NUCLEOTIDES.dTDP-Sugar-Biosynthesis.PWY-6953.	https://metacyc.org/META/new-image?type=PATHWAY&object=PWY-6953
73	Bifidobacterium shunt	3/714	1.0	1.93	NA	NA	NA	NA	NA	Lactobacillus	Lactobacillus brevis SRCM101174, Lactobacillus brevis SRCM101106, Lactobacillus salivarius UCC118	Degradation.Carbohydrates-Degradation.Sugars-And-Polysaccharides-Degradation.P124-PWY./Degradation.CARBOXYLATES-DEG.Acetate-Formation.P124-PWY./Energy-Metabolism.Fermentation.Fermentation-to-Acids.Acetate-Formation.P124-PWY./Energy-Metabolism.Fermentation.Fermentation-to-Acids.Fermentation-to-Lactate.P124-PWY.	https://metacyc.org/META/new-image?type=PATHWAY&object=P124-PWY
74	glycolate and glyoxylate degradation III	2/714	0.33	0.33	NA	NA	NA	NA	NA	Lactobacillus	Lactobacillus rhamnosus ATCC 21052, Lactobacillus rhamnosus R0011	Degradation.CARBOXYLATES-DEG.Glycolate-Degradation.PWY-6649.	https://metacyc.org/META/new-image?type=PATHWAY&object=PWY-6649
75	dTDP-D-olivose, dTDP-D-oliose and dTDP-D-mycarose biosynthesis	22/714	0.12	0.12	NA	NA	NA	NA	NA	Lactobacillus	Lactobacillus brevis TMW 1.2113, Lactobacillus brevis TMW 1.2108, Lactobacillus brevis TMW 1.2111, Lactobacillus brevis 100D8, Lactobacillus brevis SRCM101174, Lactobacillus brevis SRCM101106, Lactobacillus brevis subsp. gravesensis ATCC 27305, Lactobacillus plantarum ZJ316, Lactobacillus plantarum WJL, Lactobacillus plantarum EGD-AQ4, Lactobacillus plantarum subsp. plantarum ST-III, Lactobacillu…	Biosynthesis.Carbohydrates-Biosynthesis.CARBO-BIOSYNTHESIS.SUGAR-NUCLEOTIDES.dTDP-Sugar-Biosynthesis.PWY-6973.	https://metacyc.org/META/new-image?type=PATHWAY&object=PWY-6973
76	methylglyoxal degradation V	2/714	1.0	1.83	NA	NA	NA	NA	NA	Lactobacillus	Lactobacillus malefermentans KCTC 3548, Lactobacillus acidipiscis KCTC 13900	Degradation.Aldehyde-Degradation.Methylglyoxal-Detoxification.PWY-5458./Detoxification.Methylglyoxal-Detoxification.PWY-5458.	https://metacyc.org/META/new-image?type=PATHWAY&object=PWY-5458
77	nitric oxide biosynthesis I (plants)	24/714	1.0	1	NA	NA	NA	NA	NA	Lactobacillus, Enterococcus	Enterococcus hirae ATCC 9790, Lactobacillus brevis BSO 464, Lactobacillus brevis NPS-QW-145, Lactobacillus brevis TMW 1.2113, Lactobacillus brevis TMW 1.2108, Lactobacillus brevis TMW 1.2111, Lactobacillus brevis 100D8, Lactobacillus brevis BDGP6, Lactobacillus brevis ATCC 367, Lactobacillus helveticus H10, Lactobacillus helveticus R0052, Lactobacillus sakei WiKim0063, Lactobacillus sakei DS4, La…	Biosynthesis.Metabolic-Regulators.Nitric-Oxide-Biosynthesis.PWY-6845.	https://metacyc.org/META/new-image?type=PATHWAY&object=PWY-6845
78	cardiolipin biosynthesis II	24/714	1.0	1.33	NA	NA	NA	NA	NA	Lactobacillus, Enterococcus	Enterococcus gilvus ATCC BAA-350, Enterococcus avium ATCC 14025, Enterococcus durans ATCC 6056 ASWM, Enterococcus durans IPLA 655, Enterococcus mundtii CRL35, Enterococcus malodoratus ATCC 43197, Lactobacillus brevis NPS-QW-145, Lactobacillus brevis TMW 1.2113, Lactobacillus brevis TMW 1.2108, Lactobacillus brevis TMW 1.2111, Lactobacillus brevis 100D8, Lactobacillus brevis SRCM101174, Lactobacil…	Biosynthesis.Lipid-Biosynthesis.Phospholipid-Biosynthesis.Cardiolipin-Biosynthesis.PWY-5269.	https://metacyc.org/META/new-image?type=PATHWAY&object=PWY-5269
79	protein S-nitrosylation and denitrosylation	25/714	0.2	0.2	NA	NA	NA	NA	NA	Lactobacillus, Enterococcus	Enterococcus faecium FA3, Enterococcus faecium DMEA02, Enterococcus faecium DO, Enterococcus durans KLDS6.0933, Enterococcus durans BDGP3, Enterococcus mundtii DSM 4838, Enterococcus mundtii Pe161, Enterococcus mundtii Pe103, Lactobacillus plantarum KP, Lactobacillus plantarum DF, Lactobacillus plantarum RI-113, Lactobacillus plantarum LP2, Lactobacillus plantarum TMW 1.1623, Lactobacillus planta…	Macromolecule-Modification.Protein-Modification.PWY-7798.	https://metacyc.org/META/new-image?type=PATHWAY&object=PWY-7798
80	prenylated FMNH2 biosynthesis	4/714	0.33	0.33	NA	NA	NA	NA	NA	Lactobacillus, Enterococcus	Enterococcus faecium LS170308, Lactobacillus malefermentans CBA3618, Lactobacillus rhamnosus LOCK900, Lactobacillus rhamnosus LOCK908	Biosynthesis.Cofactor-Biosynthesis.Vitamin-Biosynthesis.Flavin-Biosynthesis.PWY0-1597.	https://metacyc.org/META/new-image?type=PATHWAY&object=PWY0-1597
81	L-lyxose degradation	7/714	0.75	0.75	NA	NA	NA	NA	NA	Lactobacillus, Enterococcus	Enterococcus faecalis V583, Enterococcus mundtii QU 25, Lactobacillus plantarum 2165, Lactobacillus plantarum WCFS1, Lactobacillus plantarum JDM1, Lactobacillus rhamnosus GG GG (ATCC 53103), Lactobacillus rhamnosus Lc 705	Degradation.Carbohydrates-Degradation.Sugars-And-Polysaccharides-Degradation.LYXMET-PWY.	https://metacyc.org/META/new-image?type=PATHWAY&object=LYXMET-PWY
82	neurosporene biosynthesis	16/714	0.4	0.4	NA	NA	NA	NA	NA	Lactobacillus, Enterococcus	Enterococcus hirae ATCC 9790, Enterococcus durans IPLA 655, Enterococcus mundtii QU 25, Lactobacillus plantarum subsp. plantarum NC8, Lactobacillus plantarum 16, Lactobacillus plantarum IPLA88, Lactobacillus plantarum WJL, Lactobacillus plantarum 4_3, Lactobacillus plantarum 2165, Lactobacillus plantarum B21, Lactobacillus plantarum 5-2, Lactobacillus plantarum WCFS1, Lactobacillus plantarum subs…	Biosynthesis.SECONDARY-METABOLITE-BIOSYNTHESIS.Terpenoid-Biosynthesis.TETRATERPENOID-SYN.C40-Carotenoids-Biosynthesis.PWY-6287./Biosynthesis.SECONDARY-METABOLITE-BIOSYNTHESIS.Terpenoid-Biosynthesis.CAROTENOID-SYN.C40-Carotenoids-Biosynthesis.PWY-6287.	https://metacyc.org/META/new-image?type=PATHWAY&object=PWY-6287
83	octaprenyl diphosphate biosynthesis	11/714	1.0	1	NA	NA	NA	NA	NA	Lactobacillus, Enterococcus	Enterococcus faecium WEFA23, Lactobacillus casei LC5, Lactobacillus helveticus DSM 20075, Lactobacillus paracasei EG9, Lactobacillus paracasei subsp. paracasei, Lactobacillus rhamnosus ATCC 21052, Lactobacillus rhamnosus CASL, Lactobacillus rhamnosus LMS2-1, Lactobacillus rhamnosus GG GG (ATCC 53103), Lactobacillus rhamnosus Lc 705, Lactobacillus rhamnosus R0011	Biosynthesis.Cofactor-Biosynthesis.Polyprenyl-Biosynthesis.PWY-5783.	https://metacyc.org/META/new-image?type=PATHWAY&object=PWY-5783
84	carbazole degradation	9/714	0.25	0.25	NA	NA	NA	NA	NA	Lactobacillus, Enterococcus	Enterococcus gilvus ATCC BAA-350, Enterococcus avium ATCC 14025, Enterococcus durans ATCC 6056 ASWM, Enterococcus durans IPLA 655, Enterococcus mundtii CRL35, Enterococcus malodoratus ATCC 43197, Lactobacillus paracasei N1115, Lactobacillus paracasei KL1, Lactobacillus murinus ASF361	Degradation.AROMATIC-COMPOUNDS-DEGRADATION.PWY-6550.	https://metacyc.org/META/new-image?type=PATHWAY&object=PWY-6550
85	4,4'-diapolycopenedioate biosynthesis	19/714	0.44	0.44	NA	NA	NA	NA	NA	Lactobacillus, Enterococcus	Enterococcus gilvus ATCC BAA-350, Enterococcus durans ATCC 6056 ASWM, Enterococcus durans IPLA 655, Enterococcus mundtii CRL35, Lactobacillus plantarum subsp. plantarum NC8, Lactobacillus plantarum UCMA 3037, Lactobacillus plantarum ZJ316, Lactobacillus plantarum 16, Lactobacillus plantarum IPLA88, Lactobacillus plantarum WJL, Lactobacillus plantarum AY01, Lactobacillus plantarum 4_3, Lactobacill…	Biosynthesis.SECONDARY-METABOLITE-BIOSYNTHESIS.Terpenoid-Biosynthesis.CAROTENOID-SYN.C30-Carotenoids-Biosynthesis.PWY-6767./Biosynthesis.SECONDARY-METABOLITE-BIOSYNTHESIS.Terpenoid-Biosynthesis.TRITERPENOID-SYN.C30-Carotenoids-Biosynthesis.PWY-6767./Biosynthesis.SECONDARY-METABOLITE-BIOSYNTHESIS.Terpenoid-Biosynthesis.TRITERPENOID-SYN.PWY-6767.	https://metacyc.org/META/new-image?type=PATHWAY&object=PWY-6767
86	L-lysine degradation IV	8/714	0.2	0.2	NA	NA	NA	NA	NA	Lactobacillus, Enterococcus	Enterococcus gilvus ATCC BAA-350, Enterococcus avium ATCC 14025, Enterococcus durans ATCC 6056 ASWM, Enterococcus durans IPLA 655, Enterococcus mundtii CRL35, Enterococcus malodoratus ATCC 43197, Lactobacillus brevis SRCM101174, Lactobacillus brevis SRCM101106	Degradation.Amino-Acid-Degradation.Proteinogenic-Amino-Acids-Degradation.LYSINE-DEG.PWY-5280.	https://metacyc.org/META/new-image?type=PATHWAY&object=PWY-5280
87	staphyloxanthin biosynthesis	2/714	0.33	0.33	NA	NA	NA	NA	NA	Lactobacillus, Enterococcus	Enterococcus mundtii CRL35, Lactobacillus plantarum subsp. plantarum P-8	Biosynthesis.SECONDARY-METABOLITE-BIOSYNTHESIS.Terpenoid-Biosynthesis.CAROTENOID-SYN.C30-Carotenoids-Biosynthesis.PWY-5875./Biosynthesis.SECONDARY-METABOLITE-BIOSYNTHESIS.Terpenoid-Biosynthesis.TRITERPENOID-SYN.C30-Carotenoids-Biosynthesis.PWY-5875./Biosynthesis.SECONDARY-METABOLITE-BIOSYNTHESIS.Terpenoid-Biosynthesis.TRITERPENOID-SYN.PWY-5875.	https://metacyc.org/META/new-image?type=PATHWAY&object=PWY-5875
88	formaldehyde oxidation II (glutathione-dependent)	40/714	0.33	0.33	NA	NA	NA	NA	NA	Lactobacillus, Enterococcus	Enterococcus faecium FA3, Enterococcus faecium DMEA02, Enterococcus faecium DO, Enterococcus hirae FDAARGOS_234, Enterococcus sp. CR-Ec1, Enterococcus sp. FDAARGOS_375, Enterococcus casseliflavus EC-369, Enterococcus durans IPLA 655, Enterococcus durans KLDS6.0933, Enterococcus durans BDGP3, Enterococcus mundtii QU 25, Enterococcus mundtii CRL35, Enterococcus mundtii EMB156, Enterococcus mundtii …	Degradation.C1-COMPOUNDS.Formaldehyde-Oxidation.PWY-1801.	https://metacyc.org/META/new-image?type=PATHWAY&object=PWY-1801
89	(R,R)-butanediol biosynthesis	37/714	1.0	1	NA	NA	NA	NA	NA	Lactobacillus, Lactococcus	Lactococcus lactis subsp. lactis CNCM I-1631, Lactococcus lactis subsp. lactis IO-1, Lactococcus lactis subsp. cremoris A76, Lactococcus lactis subsp. lactis NCDO 2118, Lactococcus lactis subsp. lactis YF11, Lactococcus lactis subsp. lactis bv. diacetylactis TIFN2, Lactococcus lactis subsp. cremoris TIFN1, Lactococcus lactis subsp. cremoris TIFN3, Lactococcus lactis subsp. cremoris TIFN5, Lactoco…	Energy-Metabolism.Fermentation.Alcohol-Biosynthesis.Butanediol-Biosynthesis.PWY-5951.	https://metacyc.org/META/new-image?type=PATHWAY&object=PWY-5951
90	pyruvate oxidation pathway	25/714	1.0	1	NA	NA	NA	NA	NA	Lactobacillus, Lactococcus	Lactococcus lactis subsp. cremoris UC509.9, Lactococcus lactis subsp. cremoris TIFN3, Lactococcus lactis subsp. cremoris TIFN7, Lactococcus lactis subsp. cremoris KW2, Lactococcus lactis subsp. lactis S0, Lactococcus lactis subsp. lactis KLDS 4.0325, Lactococcus lactis subsp. lactis KF147, Lactococcus lactis subsp. lactis CV56, Lactobacillus acidophilus NCFM, Lactobacillus brevis BSO 464, Lactoba…	Energy-Metabolism.Electron-Transfer.PYRUVOX-PWY.	https://metacyc.org/META/new-image?type=PATHWAY&object=PYRUVOX-PWY
91	pyruvate fermentation to acetoin III	5/714	0.33	0.67	NA	NA	NA	NA	NA	Lactobacillus, Lactococcus	Lactococcus lactis subsp. cremoris TIFN3, Lactococcus lactis subsp. cremoris TIFN7, Lactobacillus acidophilus NCFM, Lactobacillus brevis AG48, Lactobacillus brevis subsp. gravesensis ATCC 27305	Energy-Metabolism.Fermentation.Pyruvate-Degradation.Acetoin-Biosynthesis.PWY3O-440.	https://metacyc.org/META/new-image?type=PATHWAY&object=PWY3O-440
92	thiamine diphosphate biosynthesis IV (eukaryotes)	18/714	1.0	1	NA	NA	NA	NA	NA	Lactobacillus, Lactococcus	Lactococcus lactis subsp. lactis CNCM I-1631, Lactococcus lactis subsp. lactis NCDO 2118, Lactococcus lactis AI06, Lactococcus lactis subsp. lactis S0, Lactococcus lactis subsp. lactis Dephy 1, Lactococcus lactis subsp. lactis KLDS 4.0325, Lactococcus lactis subsp. lactis bv. diacetylactis LD61, Lactobacillus brevis KB290, Lactobacillus brevis BSO 464, Lactobacillus brevis NPS-QW-145, Lactobacill…	Biosynthesis.Cofactor-Biosynthesis.Vitamin-Biosynthesis.Thiamine-Biosynthesis.Thiamin-Diphosphate-Biosynthesis.PWY-6908.	https://metacyc.org/META/new-image?type=PATHWAY&object=PWY-6908
93	trehalose degradation II (cytosolic)	4/714	1.0	1	NA	NA	NA	NA	NA	Lactobacillus, Lactococcus	Lactococcus lactis subsp. lactis KF147, Lactobacillus plantarum X7021, Lactobacillus plantarum YW11, Lactobacillus plantarum SRCM103361	Degradation.Carbohydrates-Degradation.Sugars-And-Polysaccharides-Degradation.Trehalose-Degradation.PWY0-1182.	https://metacyc.org/META/new-image?type=PATHWAY&object=PWY0-1182
94	1,2-dichloroethane degradation	10/714	0.25	0.25	NA	NA	NA	NA	NA	Lactobacillus, Lactococcus	Lactococcus lactis subsp. lactis YF11, Lactococcus lactis subsp. lactis Dephy 1, Lactococcus garvieae DCC43, Lactobacillus acidophilus La-14, Lactobacillus acidophilus FSI4, Lactobacillus acidophilus ATCC 53544, Lactobacillus acidophilus LA1, Lactobacillus acidophilus DSM 20079, Lactobacillus acidophilus YT1, Lactobacillus brevis TMW 1.2113	Degradation.CHLORINATED-COMPOUNDS-DEG.12DICHLORETHDEG-PWY.	https://metacyc.org/META/new-image?type=PATHWAY&object=12DICHLORETHDEG-PWY
95	(S,S)-butanediol degradation	8/714	1.0	1	NA	NA	NA	NA	NA	Lactobacillus, Lactococcus	Lactococcus lactis subsp. lactis IO-1, Lactococcus lactis subsp. cremoris A76, Lactococcus lactis subsp. lactis NCDO 2118, Lactococcus lactis subsp. lactis Il1403, Lactococcus lactis subsp. cremoris MG1363, Lactococcus lactis subsp. cremoris NZ9000, Lactobacillus brevis SRCM101174, Lactobacillus brevis SRCM101106	Degradation.Alcohol-Degradation.2-3-Butanediol-Degradation.PWY-6388.	https://metacyc.org/META/new-image?type=PATHWAY&object=PWY-6388
96	NADH to cytochrome bo oxidase electron transfer I	40/714	1.0	1.5	NA	NA	NA	NA	NA	Lactobacillus, Lactococcus	Lactococcus lactis subsp. lactis IO-1, Lactococcus lactis subsp. lactis NCDO 2118, Lactococcus lactis subsp. lactis bv. diacetylactis TIFN2, Lactococcus lactis subsp. cremoris TIFN1, Lactococcus lactis subsp. cremoris TIFN5, Lactococcus lactis subsp. lactis bv. diacetylactis str. TIFN4, Lactococcus lactis subsp. lactis S0, Lactococcus lactis subsp. lactis KLDS 4.0325, Lactococcus lactis subsp. la…	Energy-Metabolism.Respiration.AEROBIC-RESPIRATION.PWY0-1335./Energy-Metabolism.Electron-Transfer.PWY0-1335.	https://metacyc.org/META/new-image?type=PATHWAY&object=PWY0-1335
97	(R,R)-butanediol degradation	37/714	1.0	1	NA	NA	NA	NA	NA	Lactobacillus, Lactococcus	Lactococcus lactis subsp. lactis CNCM I-1631, Lactococcus lactis subsp. lactis IO-1, Lactococcus lactis subsp. cremoris A76, Lactococcus lactis subsp. lactis NCDO 2118, Lactococcus lactis subsp. lactis YF11, Lactococcus lactis subsp. lactis bv. diacetylactis TIFN2, Lactococcus lactis subsp. cremoris TIFN1, Lactococcus lactis subsp. cremoris TIFN3, Lactococcus lactis subsp. cremoris TIFN5, Lactoco…	Degradation.Alcohol-Degradation.2-3-Butanediol-Degradation.PWY3O-246.	https://metacyc.org/META/new-image?type=PATHWAY&object=PWY3O-246
98	meso-butanediol biosynthesis II	21/714	1.0	1	NA	NA	NA	NA	NA	Lactobacillus, Lactococcus	Lactococcus lactis subsp. lactis IO-1, Lactococcus lactis subsp. cremoris A76, Lactococcus lactis subsp. lactis NCDO 2118, Lactococcus lactis subsp. lactis YF11, Lactococcus lactis subsp. lactis bv. diacetylactis TIFN2, Lactococcus lactis subsp. lactis bv. diacetylactis str. TIFN4, Lactococcus lactis AI06, Lactococcus lactis subsp. lactis A12, Lactococcus lactis subsp. lactis S0, Lactococcus lact…	Energy-Metabolism.Fermentation.Alcohol-Biosynthesis.Butanediol-Biosynthesis.PWY-6392.	https://metacyc.org/META/new-image?type=PATHWAY&object=PWY-6392
99	benzoyl-CoA biosynthesis	15/714	0.33	0.33	NA	NA	NA	NA	NA	Lactobacillus, Lactococcus	Lactococcus lactis subsp. lactis S0, Lactococcus lactis subsp. lactis KLDS 4.0325, Lactobacillus brevis BSO 464, Lactobacillus brevis NPS-QW-145, Lactobacillus brevis TMW 1.2113, Lactobacillus brevis TMW 1.2108, Lactobacillus brevis TMW 1.2111, Lactobacillus brevis 100D8, Lactobacillus sakei WiKim0063, Lactobacillus sakei FAM18311, Lactobacillus curvatus FBA2, Lactobacillus curvatus WiKim52, Lact…	Biosynthesis.AROMATIC-COMPOUNDS-BIOSYN.PWY-6458.	https://metacyc.org/META/new-image?type=PATHWAY&object=PWY-6458
100	copper transport I	16/714	0.5	0.5	NA	NA	NA	NA	NA	Lactobacillus, Lactococcus	Lactococcus lactis subsp. lactis YF11, Lactococcus lactis subsp. lactis Dephy 1, Lactococcus piscium MKFS47, Lactobacillus acidophilus NCFM, Lactobacillus brevis NPS-QW-145, Lactobacillus brevis 100D8, Lactobacillus helveticus DPC 4571, Lactobacillus plantarum ZJ316, Lactobacillus plantarum 16, Lactobacillus plantarum 5-2, Lactobacillus plantarum WCFS1, Lactobacillus plantarum JDM1, Lactobacillus…	Transport-PWY-6135	https://metacyc.org/META/new-image?type=PATHWAY&object=Transport-PWY-6135
101	(S,S)-butanediol biosynthesis	8/714	1.0	1	NA	NA	NA	NA	NA	Lactobacillus, Lactococcus	Lactococcus lactis subsp. lactis IO-1, Lactococcus lactis subsp. cremoris A76, Lactococcus lactis subsp. lactis NCDO 2118, Lactococcus lactis subsp. lactis Il1403, Lactococcus lactis subsp. cremoris MG1363, Lactococcus lactis subsp. cremoris NZ9000, Lactobacillus brevis SRCM101174, Lactobacillus brevis SRCM101106	Energy-Metabolism.Fermentation.Alcohol-Biosynthesis.Butanediol-Biosynthesis.PWY-6390.	https://metacyc.org/META/new-image?type=PATHWAY&object=PWY-6390
102	nitrogen fixation II (flavodoxin)	21/714	1.0	1	NA	NA	NA	NA	NA	Lactobacillus, Lactococcus	Lactococcus lactis IL6288, Lactococcus lactis IL1403, Lactococcus lactis subsp. lactis G423, Lactococcus lactis subsp. lactis G50, Lactococcus lactis subsp. lactis 14B4, Lactococcus lactis subsp. lactis 229, Lactococcus lactis subsp. lactis 275, Lactococcus lactis subsp. lactis UC063, Lactococcus lactis subsp. lactis UL8, Lactococcus lactis subsp. lactis UC06, Lactococcus lactis subsp. lactis UC0…	Degradation.Noncarbon-Nutrients.NITROGEN-DEG.Nitrogen-Fixation.PWY-7576.	https://metacyc.org/META/new-image?type=PATHWAY&object=PWY-7576
103	meso-butanediol biosynthesis I	21/714	1.0	1	NA	NA	NA	NA	NA	Lactobacillus, Lactococcus	Lactococcus lactis subsp. lactis IO-1, Lactococcus lactis subsp. cremoris A76, Lactococcus lactis subsp. lactis NCDO 2118, Lactococcus lactis subsp. lactis YF11, Lactococcus lactis subsp. lactis bv. diacetylactis TIFN2, Lactococcus lactis subsp. lactis bv. diacetylactis str. TIFN4, Lactococcus lactis AI06, Lactococcus lactis subsp. lactis A12, Lactococcus lactis subsp. lactis S0, Lactococcus lact…	Energy-Metabolism.Fermentation.Alcohol-Biosynthesis.Butanediol-Biosynthesis.PWY-6391.	https://metacyc.org/META/new-image?type=PATHWAY&object=PWY-6391
104	trehalose degradation III	107/714	1.0	1	NA	NA	NA	NA	NA	Lactobacillus, Lactococcus, Enterococcus	Enterococcus faecalis TY1, Enterococcus faecalis KUB3006, Enterococcus faecalis CVM N48037F, Enterococcus faecalis CVM N60443F, Enterococcus faecalis FC, Enterococcus faecalis SGAir0397, Enterococcus faecalis C25, Enterococcus faecalis C54, Enterococcus faecalis NCTC8745, Enterococcus faecalis NCTC8732, Enterococcus faecalis H25, Enterococcus faecalis V583, Enterococcus faecium Aus0085, Enterococ…	Degradation.Carbohydrates-Degradation.Sugars-And-Polysaccharides-Degradation.Trehalose-Degradation.PWY-2721.	https://metacyc.org/META/new-image?type=PATHWAY&object=PWY-2721
105	2-O-&alpha;-mannosyl-D-glycerate degradation	42/714	1.0	1	NA	NA	NA	NA	NA	Lactobacillus, Lactococcus, Enterococcus	Enterococcus hirae ATCC 9790, Enterococcus durans ATCC 6056 ASWM, Enterococcus durans IPLA 655, Enterococcus mundtii QU 25, Enterococcus mundtii CRL35, Lactococcus lactis subsp. lactis CNCM I-1631, Lactococcus lactis subsp. lactis YF11, Lactococcus lactis subsp. lactis bv. diacetylactis TIFN2, Lactococcus lactis subsp. lactis bv. diacetylactis str. TIFN4, Lactococcus lactis AI06, Lactococcus lact…	Degradation.Carbohydrates-Degradation.Sugars-And-Polysaccharides-Degradation.PWY0-1300.	https://metacyc.org/META/new-image?type=PATHWAY&object=PWY0-1300
106	malonate degradation I (biotin-independent)	14/714	0.33	0.33	NA	NA	NA	NA	NA	Lactobacillus, Lactococcus, Enterococcus	Enterococcus hirae ATCC 9790, Enterococcus durans ATCC 6056 ASWM, Enterococcus durans IPLA 655, Enterococcus mundtii QU 25, Lactococcus lactis subsp. cremoris NZ9000, Lactobacillus delbrueckii subsp. bulgaricus ATCC BAA-365, Lactobacillus plantarum 16, Lactobacillus plantarum EGD-AQ4, Lactobacillus paracasei ATCC 334, Lactobacillus sakei DS4, Lactobacillus rhamnosus ATCC 21052, Lactobacillus rham…	Degradation.CARBOXYLATES-DEG.Malonate-Degradation.PWY-5794.	https://metacyc.org/META/new-image?type=PATHWAY&object=PWY-5794
107	trehalose degradation IV	14/714	1.0	1.33	NA	NA	NA	NA	NA	Lactobacillus, Lactococcus, Enterococcus	Enterococcus faecium DO, Enterococcus malodoratus ATCC 43197, Lactococcus lactis subsp. cremoris A76, Lactococcus lactis subsp. lactis Dephy 1, Lactobacillus brevis SRCM101174, Lactobacillus brevis SRCM101106, Lactobacillus casei 12A, Lactobacillus plantarum subsp. plantarum NC8, Lactobacillus plantarum UCMA 3037, Lactobacillus plantarum 16, Lactobacillus plantarum WCFS1, Lactobacillus paracasei …	Degradation.Carbohydrates-Degradation.Sugars-And-Polysaccharides-Degradation.Trehalose-Degradation.PWY-2722.	https://metacyc.org/META/new-image?type=PATHWAY&object=PWY-2722
108	adenine and adenosine salvage II	189/714	0.5	1	NA	NA	NA	NA	NA	Lactobacillus, Lactococcus, Enterococcus	Enterococcus faecium ATCC 8459 = NRRL B-2354, Enterococcus faecium E1, Enterococcus faecium 64/3, Enterococcus faecium UW7606x64/3 TC1, Enterococcus faecium FDAARGOS_323, Enterococcus faecium AUSMDU00004142, Enterococcus faecium FSIS1608820, Enterococcus faecium VB3025, Enterococcus faecium VB3240, Enterococcus faecium UAMSEF_01, Enterococcus faecium UAMSEF_08, Enterococcus faecium UAMSEF_09, Ent…	Biosynthesis.Nucleotide-Biosynthesis.PUR-NUC-SYN.Purine-Nucleotides-Salvage.Adenine-Adenosine-Salvage.PWY-6605.	https://metacyc.org/META/new-image?type=PATHWAY&object=PWY-6605
109	peptidoglycan cross-bridge biosynthesis II (E. faecium)	152/714	0.5	0.5	NA	NA	NA	NA	NA	Lactobacillus, Lactococcus, Enterococcus	Enterococcus faecium ATCC 8459 = NRRL B-2354, Enterococcus faecium Aus0085, Enterococcus faecium E745, Enterococcus faecium E1, Enterococcus faecium VRE001, Enterococcus faecium ISMMS_VRE_12, Enterococcus faecium ISMMS_VRE_9, Enterococcus faecium 2014-VREF-41, Enterococcus faecium K60-39, Enterococcus faecium A_020709_82, Enterococcus faecium E240, Enterococcus faecium E243, Enterococcus faecium …	Biosynthesis.Cell-Structure-Biosynthesis.Cell-Wall-Biosynthesis.Peptidoglycan-Cross-Bridge-Biosynthesis.PWY-6461.	https://metacyc.org/META/new-image?type=PATHWAY&object=PWY-6461
110	nitric oxide biosynthesis II (mammals)	15/714	1.0	1	NA	NA	NA	NA	NA	Lactobacillus, Lactococcus, Enterococcus	Enterococcus mundtii QU 25, Lactococcus lactis subsp. lactis NCDO 2118, Lactococcus lactis subsp. cremoris KW2, Lactococcus lactis subsp. lactis S0, Lactococcus lactis subsp. lactis KLDS 4.0325, Lactobacillus plantarum ZJ316, Lactobacillus plantarum 16, Lactobacillus plantarum B21, Lactobacillus plantarum 5-2, Lactobacillus plantarum WCFS1, Lactobacillus plantarum subsp. plantarum ST-III, Lactoba…	Degradation.Amino-Acid-Degradation.Proteinogenic-Amino-Acids-Degradation.ARGININE-DEG.PWY-4983./Biosynthesis.Metabolic-Regulators.Nitric-Oxide-Biosynthesis.PWY-4983./Biosynthesis.Amino-Acid-Biosynthesis.IND-AMINO-ACID-SYN.ARGININE-SYN.PWY-4983.	https://metacyc.org/META/new-image?type=PATHWAY&object=PWY-4983
111	NADH to cytochrome bd oxidase electron transfer I	95/714	1.0	1.5	NA	NA	NA	NA	NA	Lactobacillus, Lactococcus, Enterococcus	Enterococcus faecalis V583, Lactococcus lactis subsp. lactis CNCM I-1631, Lactococcus lactis subsp. lactis IO-1, Lactococcus lactis subsp. cremoris A76, Lactococcus lactis subsp. cremoris UC509.9, Lactococcus lactis subsp. lactis NCDO 2118, Lactococcus lactis subsp. lactis YF11, Lactococcus lactis subsp. lactis bv. diacetylactis TIFN2, Lactococcus lactis subsp. cremoris TIFN1, Lactococcus lactis …	Energy-Metabolism.Respiration.AEROBIC-RESPIRATION.PWY0-1334./Energy-Metabolism.Electron-Transfer.PWY0-1334.	https://metacyc.org/META/new-image?type=PATHWAY&object=PWY0-1334
112	&alpha;-diglucosyldiacylglycerol biosynthesis	10/714	0.5	0.5	NA	NA	NA	NA	NA	Lactobacillus, Lactococcus, Enterococcus	Enterococcus faecium SC4, Enterococcus faecium DO, Lactococcus lactis subsp. cremoris JM3, Lactococcus lactis subsp. lactis G423, Lactococcus lactis subsp. lactis 275, Lactococcus lactis subsp. lactis UC063, Lactococcus lactis subsp. lactis F44, Lactobacillus delbrueckii subsp. bulgaricus MN-BM-F01, Lactobacillus delbrueckii subsp. bulgaricus KLDS1.1011, Lactobacillus delbrueckii subsp. bulgaricu…	Biosynthesis.Lipid-Biosynthesis.Glycolipids-Biosynthesis.PWY-7684.	https://metacyc.org/META/new-image?type=PATHWAY&object=PWY-7684
113	purine deoxyribonucleosides salvage	498/714	0.67	1	NA	NA	NA	NA	NA	Lactobacillus, Lactococcus, Enterococcus, Turicibacter	Enterococcus faecalis EnGen0107, Enterococcus faecalis ATCC 29212, Enterococcus faecalis D32, Enterococcus faecalis str. Symbioflor 1, Enterococcus faecalis DENG1, Enterococcus faecalis FDAARGOS_324, Enterococcus faecalis TY1, Enterococcus faecalis FDAARGOS_528, Enterococcus faecalis KUB3006, Enterococcus faecalis KUB3007, Enterococcus faecalis CVM N48037F, Enterococcus faecalis CVM N60443F, Ente…	Metabolic-Clusters.PWY-7224./Biosynthesis.Nucleotide-Biosynthesis.PUR-NUC-SYN.Purine-Nucleotides-Salvage.PWY-7224.	https://metacyc.org/META/new-image?type=PATHWAY&object=PWY-7224
114	pyruvate fermentation to acetone	29/714	0.2	0.2	NA	NA	NA	NA	NA	Lactobacillus, Megasphaera	Lactobacillus jensenii 115-3-CHN, Lactobacillus plantarum subsp. plantarum NC8, Lactobacillus plantarum UCMA 3037, Lactobacillus plantarum ZJ316, Lactobacillus plantarum 16, Lactobacillus plantarum IPLA88, Lactobacillus plantarum WJL, Lactobacillus plantarum AY01, Lactobacillus plantarum EGD-AQ4, Lactobacillus plantarum 4_3, Lactobacillus plantarum 2165, Lactobacillus plantarum 2025, Lactobacillu…	Energy-Metabolism.Fermentation.Pyruvate-Degradation.PWY-6588.	https://metacyc.org/META/new-image?type=PATHWAY&object=PWY-6588
115	pyruvate fermentation to acetate VIII	13/714	1.0	1	NA	NA	NA	NA	NA	Lactobacillus, Megasphaera, Enterococcus	Enterococcus mundtii QU 25, Lactobacillus brevis ATCC 14869 = DSM 20054, Lactobacillus plantarum subsp. plantarum NC8, Lactobacillus plantarum UCMA 3037, Lactobacillus plantarum WJL, Lactobacillus plantarum AY01, Lactobacillus plantarum 4_3, Lactobacillus plantarum 2025, Lactobacillus plantarum B21, Lactobacillus plantarum subsp. plantarum CGMCC 1.557, Lactobacillus plantarum subsp. plantarum ATC…	Degradation.CARBOXYLATES-DEG.Acetate-Formation.Pyruvate-Acetate-Fermentation.PWY-5768./Energy-Metabolism.Fermentation.Pyruvate-Degradation.Pyruvate-Acetate-Fermentation.PWY-5768./Energy-Metabolism.Fermentation.Fermentation-to-Acids.Acetate-Formation.Pyruvate-Acetate-Fermentation.PWY-5768.	https://metacyc.org/META/new-image?type=PATHWAY&object=PWY-5768
116	testosterone and androsterone degradation to androstendione	21/714	0.33	0.67	NA	NA	NA	NA	NA	Lactobacillus, Megasphaera, Lactococcus	Lactococcus lactis subsp. lactis 275, Lactobacillus brevis BSO 464, Lactobacillus brevis NPS-QW-145, Lactobacillus brevis TMW 1.2113, Lactobacillus brevis TMW 1.2108, Lactobacillus brevis TMW 1.2111, Lactobacillus brevis 100D8, Lactobacillus brevis SRCM101174, Lactobacillus brevis SRCM101106, Lactobacillus buchneri NRRL B-30929, Lactobacillus plantarum EGD-AQ4, Lactobacillus reuteri TD1, Lactobac…	Degradation.Fatty-Acid-and-Lipid-Degradation.Steroids-Degradation.PWY-6943.	https://metacyc.org/META/new-image?type=PATHWAY&object=PWY-6943
117	S-methyl-5'-thioadenosine degradation II	9/714	1.0	1	NA	NA	NA	NA	NA	Lactobacillus, Megasphaera, Lactococcus, Dialister pneumosintes	Lactococcus lactis subsp. cremoris A76, Lactococcus lactis subsp. lactis S0, Dialister pneumosintes F0677, Lactobacillus plantarum B21, Megasphaera hexanoica MH, Megasphaera stantonii AJH120, Megasphaera elsdenii DSM 20460, Megasphaera elsdenii 14-14, Megasphaera elsdenii NCIMB702410	Degradation.NUCLEO-DEG.Methylthioadenosine-Degradation.PWY-6756.	https://metacyc.org/META/new-image?type=PATHWAY&object=PWY-6756
118	L-phenylalanine degradation I (aerobic)	15/714	0.33	0.33	NA	NA	NA	NA	NA	Lactobacillus, Megasphaera, Lactococcus, Enterococcus	Enterococcus sp. CR-Ec1, Lactococcus lactis subsp. cremoris UC509.9, Lactococcus garvieae DCC43, Lactobacillus plantarum 16, Lactobacillus plantarum B21, Lactobacillus plantarum 5-2, Lactobacillus plantarum WCFS1, Lactobacillus plantarum JDM1, Lactobacillus plantarum subsp. plantarum P-8, Lactobacillus plantarum subsp. plantarum ST-III, Lactobacillus paracasei ATCC 334, Lactobacillus ruminis ATCC…	Degradation.Amino-Acid-Degradation.Proteinogenic-Amino-Acids-Degradation.PHENYLALANINE-DEG.PHENYLALANINE-DEG1-PWY.	https://metacyc.org/META/new-image?type=PATHWAY&object=PHENYLALANINE-DEG1-PWY
119	acetaldehyde biosynthesis II	59/714	1.0	1	NA	NA	NA	NA	NA	Lactobacillus, Megasphaera, Lactococcus, Enterococcus	Enterococcus faecalis V583, Enterococcus hirae ATCC 9790, Enterococcus durans ATCC 6056 ASWM, Enterococcus durans IPLA 655, Enterococcus mundtii QU 25, Enterococcus mundtii CRL35, Lactococcus lactis subsp. lactis IO-1, Lactococcus lactis subsp. lactis NCDO 2118, Lactococcus lactis subsp. cremoris KW2, Lactococcus lactis AI06, Lactococcus lactis subsp. lactis S0, Lactococcus lactis subsp. lactis K…	Biosynthesis.SECONDARY-METABOLITE-BIOSYNTHESIS.PWY-6330./Biosynthesis.Carbohydrates-Biosynthesis.Acetaldehyde-Biosynthesis.PWY-6330.	https://metacyc.org/META/new-image?type=PATHWAY&object=PWY-6330
120	acetaldehyde biosynthesis I	39/714	1.0	1.5	NA	NA	NA	NA	NA	Lactobacillus, Megasphaera, Lactococcus, Enterococcus	Enterococcus faecalis V583, Enterococcus hirae ATCC 9790, Enterococcus mundtii QU 25, Lactococcus lactis subsp. lactis IO-1, Lactococcus lactis subsp. lactis NCDO 2118, Lactococcus lactis subsp. cremoris KW2, Lactococcus lactis subsp. lactis S0, Lactococcus lactis subsp. lactis KLDS 4.0325, Lactobacillus brevis BSO 464, Lactobacillus brevis AG48, Lactobacillus plantarum subsp. plantarum NC8, Lact…	Biosynthesis.Carbohydrates-Biosynthesis.Acetaldehyde-Biosynthesis.PWY-6333.	https://metacyc.org/META/new-image?type=PATHWAY&object=PWY-6333
121	protocatechuate degradation III (para-cleavage pathway)	55/714	0.2	0.2	NA	NA	NA	NA	NA	Lactobacillus, Megasphaera, Lactococcus, Enterococcus	Enterococcus faecalis V583, Enterococcus hirae ATCC 9790, Enterococcus mundtii QU 25, Lactococcus lactis subsp. lactis IO-1, Lactococcus lactis subsp. cremoris UC509.9, Lactococcus lactis subsp. lactis NCDO 2118, Lactococcus lactis AI06, Lactococcus lactis subsp. lactis S0, Lactococcus lactis subsp. lactis KLDS 4.0325, Lactococcus lactis subsp. cremoris SK11, Lactococcus lactis subsp. cremoris MG…	Degradation.AROMATIC-COMPOUNDS-DEGRADATION.Protocatechuate-Degradation.PWY-6336.	https://metacyc.org/META/new-image?type=PATHWAY&object=PWY-6336
122	L-cysteine biosynthesis III (from L-homocysteine)	108/714	0.5	0.5	NA	NA	NA	NA	NA	Lactobacillus, Megasphaera, Lactococcus, Enterococcus	Enterococcus hirae ATCC 9790, Enterococcus gilvus ATCC BAA-350, Enterococcus avium ATCC 14025, Enterococcus durans ATCC 6056 ASWM, Enterococcus durans IPLA 655, Enterococcus mundtii CRL35, Enterococcus malodoratus ATCC 43197, Lactococcus lactis subsp. lactis CNCM I-1631, Lactococcus lactis subsp. cremoris A76, Lactococcus lactis subsp. cremoris UC509.9, Lactococcus lactis subsp. lactis YF11, Lact…	Degradation.Amino-Acid-Degradation.Proteinogenic-Amino-Acids-Degradation.HOMOCYSTEINE-DEG.HOMOCYSDEGR-PWY./Biosynthesis.Amino-Acid-Biosynthesis.IND-AMINO-ACID-SYN.CYSTEINE-SYN.HOMOCYSDEGR-PWY.	https://metacyc.org/META/new-image?type=PATHWAY&object=HOMOCYSDEGR-PWY
123	pyruvate fermentation to ethanol II	39/714	1.0	1.5	NA	NA	NA	NA	NA	Lactobacillus, Megasphaera, Lactococcus, Enterococcus	Enterococcus faecalis V583, Enterococcus hirae ATCC 9790, Enterococcus mundtii QU 25, Lactococcus lactis subsp. lactis IO-1, Lactococcus lactis subsp. lactis NCDO 2118, Lactococcus lactis subsp. cremoris KW2, Lactococcus lactis subsp. lactis S0, Lactococcus lactis subsp. lactis KLDS 4.0325, Lactobacillus brevis BSO 464, Lactobacillus brevis AG48, Lactobacillus plantarum subsp. plantarum NC8, Lact…	Energy-Metabolism.Fermentation.Pyruvate-Degradation.Pyruvate-Ethanol-Fermentation.PWY-5486./Energy-Metabolism.Fermentation.Alcohol-Biosynthesis.Pyruvate-Ethanol-Fermentation.PWY-5486.	https://metacyc.org/META/new-image?type=PATHWAY&object=PWY-5486
124	mevalonate pathway I	159/714	0.86	1	NA	NA	NA	NA	NA	Lactobacillus, Megasphaera, Lactococcus, Enterococcus	Enterococcus faecalis V583, Enterococcus hirae ATCC 9790, Enterococcus gilvus ATCC BAA-350, Enterococcus avium ATCC 14025, Enterococcus durans ATCC 6056 ASWM, Enterococcus durans IPLA 655, Enterococcus mundtii QU 25, Enterococcus mundtii CRL35, Enterococcus malodoratus ATCC 43197, Lactococcus lactis subsp. lactis CNCM I-1631, Lactococcus lactis subsp. lactis IO-1, Lactococcus lactis subsp. cremor…	Biosynthesis.SECONDARY-METABOLITE-BIOSYNTHESIS.Terpenoid-Biosynthesis.ISOPRENOIDS.Isopentenyl-Diphosphate-Biosynthesis.Mevalonate-PWY-922.	https://metacyc.org/META/new-image?type=PATHWAY&object=Mevalonate-PWY-922
125	L-proline biosynthesis III	1/714	0.75	1	NA	NA	NA	NA	NA	Lactococcus	Lactococcus lactis subsp. lactis KF147	Biosynthesis.Amino-Acid-Biosynthesis.IND-AMINO-ACID-SYN.PROLINE-SYN.PWY-3341.	https://metacyc.org/META/new-image?type=PATHWAY&object=PWY-3341
126	L-leucine degradation III	6/714	1.0	1	NA	NA	NA	NA	NA	Lactococcus	Lactococcus lactis subsp. lactis IO-1, Lactococcus lactis subsp. lactis NCDO 2118, Lactococcus lactis subsp. cremoris KW2, Lactococcus lactis AI06, Lactococcus lactis subsp. lactis S0, Lactococcus lactis subsp. lactis KLDS 4.0325	Degradation.Amino-Acid-Degradation.Proteinogenic-Amino-Acids-Degradation.LEUCINE-DEG.PWY-5076.	https://metacyc.org/META/new-image?type=PATHWAY&object=PWY-5076
127	salicylate biosynthesis I	1/714	0.5	0.5	NA	NA	NA	NA	NA	Lactococcus	Lactococcus piscium MKFS47	Biosynthesis.AROMATIC-COMPOUNDS-BIOSYN.Salicylate-Biosynthesis.PWY-6406.	https://metacyc.org/META/new-image?type=PATHWAY&object=PWY-6406
128	L-malate degradation I	7/714	1.0	1	NA	NA	NA	NA	NA	Lactococcus	Lactococcus lactis IL6288, Lactococcus lactis IL1403, Lactococcus lactis subsp. lactis 229, Lactococcus lactis subsp. lactis 275, Lactococcus lactis subsp. lactis UC063, Lactococcus lactis subsp. lactis UL8, Lactococcus lactis subsp. lactis bv. diacetylactis FM03	Degradation.CARBOXYLATES-DEG.L-Malate-Degradation.PWY-7685./Detoxification.Acid-Resistance.PWY-7685.	https://metacyc.org/META/new-image?type=PATHWAY&object=PWY-7685
129	phosphonoacetate degradation	9/714	1.0	1	NA	NA	NA	NA	NA	Lactococcus, Enterococcus	Enterococcus faecium DO, Enterococcus mundtii EMB156, Lactococcus lactis subsp. cremoris JM2, Lactococcus lactis subsp. lactis S0, Lactococcus lactis subsp. lactis 275, Lactococcus lactis subsp. lactis UC063, Lactococcus lactis subsp. lactis UL8, Lactococcus lactis subsp. lactis CV56, Lactococcus raffinolactis WiKim0068	Degradation.Noncarbon-Nutrients.Phosphorus-Compounds.P483-PWY.	https://metacyc.org/META/new-image?type=PATHWAY&object=P483-PWY
130	CMP-KDO biosynthesis II (from D-arabinose 5-phosphate)	2/714	1.0	1.17	NA	NA	NA	NA	NA	Megasphaera	Megasphaera hexanoica MH, Megasphaera elsdenii 14-14	Biosynthesis.Carbohydrates-Biosynthesis.Polysaccharides-Biosynthesis.CMP-KDO-Biosynthesis.PWY-5111./Biosynthesis.Carbohydrates-Biosynthesis.CARBO-BIOSYNTHESIS.SUGAR-NUCLEOTIDES.PWY-5111.	https://metacyc.org/META/new-image?type=PATHWAY&object=PWY-5111
131	nitrite-dependent anaerobic methane oxidation	2/714	0.5	0.5	NA	NA	NA	NA	NA	Megasphaera	Megasphaera hexanoica MH, Megasphaera elsdenii 14-14	Degradation.Noncarbon-Nutrients.NITROGEN-DEG.Denitrification.PWY-6523./Degradation.C1-COMPOUNDS.Methane-Oxidation.PWY-6523.	https://metacyc.org/META/new-image?type=PATHWAY&object=PWY-6523
132	phosphatidylcholine biosynthesis VI	3/714	1.0	1	NA	NA	NA	NA	NA	Megasphaera	Megasphaera stantonii AJH120, Megasphaera elsdenii DSM 20460, Megasphaera elsdenii NCIMB702410	Biosynthesis.Lipid-Biosynthesis.Phospholipid-Biosynthesis.PhosphatidylcholineBiosynthesis.PWY-6826.	https://metacyc.org/META/new-image?type=PATHWAY&object=PWY-6826
133	betanidin degradation	1/714	1.0	1	NA	NA	NA	NA	NA	Megasphaera	Megasphaera hexanoica MH	Degradation.SECONDARY-METABOLITE-DEGRADATION.N-CONTAINING-SECONDARY-CMPD-DEG.ALKALOIDS.PWY-5461.	https://metacyc.org/META/new-image?type=PATHWAY&object=PWY-5461
134	arachidonate biosynthesis II (bacteria)	3/714	1.0	2	NA	NA	NA	NA	NA	Megasphaera	Megasphaera stantonii AJH120, Megasphaera elsdenii DSM 20460, Megasphaera elsdenii NCIMB702410	Biosynthesis.Lipid-Biosynthesis.Fatty-acid-biosynthesis.Unsaturated-Fatty-Acids-Biosynthesis.PUFA-Biosynthesis.Arachidonate-Biosynthesis.PWY-7583.	https://metacyc.org/META/new-image?type=PATHWAY&object=PWY-7583
135	carbon monoxide oxidation to CO2	1/714	1.0	1	NA	NA	NA	NA	NA	Megasphaera	Megasphaera elsdenii DSM 20460	Degradation.C1-COMPOUNDS.PWY-7750.	https://metacyc.org/META/new-image?type=PATHWAY&object=PWY-7750
136	3-chlorocatechol degradation II (ortho)	15/714	0.2	0.2	NA	NA	NA	NA	NA	Megasphaera, Lactococcus, Enterococcus	Enterococcus mundtii CRL35, Lactococcus lactis subsp. lactis bv. diacetylactis TIFN2, Lactococcus lactis subsp. cremoris TIFN3, Lactococcus lactis subsp. cremoris TIFN7, Lactococcus lactis subsp. lactis bv. diacetylactis str. TIFN4, Lactococcus lactis subsp. lactis S0, Lactococcus lactis subsp. lactis KLDS 4.0325, Lactococcus lactis subsp. lactis bv. diacetylactis LD61, Lactococcus lactis subsp. …	Degradation.CHLORINATED-COMPOUNDS-DEG.Chloroaromatic-Compounds-Degradation.Chlorocatechol-Degradation.3-Chlorocatechol-Degradation.PWY-6193./Degradation.AROMATIC-COMPOUNDS-DEGRADATION.Chloroaromatic-Compounds-Degradation.Chlorocatechol-Degradation.3-Chlorocatechol-Degradation.PWY-6193.	https://metacyc.org/META/new-image?type=PATHWAY&object=PWY-6193
137	lipoate biosynthesis and incorporation I	6/714	0.5	0.5	NA	NA	NA	NA	NA	Parvimonas micra, Lactobacillus, Parvimonas	Parvimonas micra KCOM 1037, Parvimonas micra NCTC11808, Parvimonas micra KCOM 1535; ChDC B708, Parvimonas micra KCOM 1037, Parvimonas micra NCTC11808, Parvimonas micra KCOM 1535; ChDC B708, Lactobacillus paracollinoides TMW 1.1979, Lactobacillus paracollinoides TMW 1.1995, Lactobacillus paracollinoides TMW 1.1994	Biosynthesis.Cofactor-Biosynthesis.Lipoate-Biosynthesis.PWY0-501.	https://metacyc.org/META/new-image?type=PATHWAY&object=PWY0-501
138	thio-molybdenum cofactor biosynthesis	2/714	1.0	1	NA	NA	NA	NA	NA	Parvimonas micra, Parvimonas	Parvimonas micra NCTC11808, Parvimonas micra KCOM 1535; ChDC B708, Parvimonas micra NCTC11808, Parvimonas micra KCOM 1535; ChDC B708	Biosynthesis.Cofactor-Biosynthesis.PWY-5963.	https://metacyc.org/META/new-image?type=PATHWAY&object=PWY-5963
139	formate to nitrite electron transfer	3/714	0.67	0.67	NA	NA	NA	NA	NA	Selenomonas	Selenomonas sp. oral taxon 920 W5150, Selenomonas sp. oral taxon 478 F0592, Selenomonas sp. oral taxon 136 F0591	Energy-Metabolism.Respiration.ANAEROBIC-RESPIRATION.PWY0-1585./Energy-Metabolism.Electron-Transfer.PWY0-1585.	https://metacyc.org/META/new-image?type=PATHWAY&object=PWY0-1585
140	adenosylcobinamide-GDP biosynthesis from cobyrinate a,c-diamide	1/714	0.83	1.5	NA	NA	NA	NA	NA	Selenomonas	Selenomonas ruminantium subsp. lactilytica TAM6421	Biosynthesis.Cofactor-Biosynthesis.Vitamin-Biosynthesis.Cobalamin-Biosynthesis.Cobamide-De-Novo-Biosynthesis.PWY-7962.	https://metacyc.org/META/new-image?type=PATHWAY&object=PWY-7962
141	incomplete reductive TCA cycle	1/714	1.0	1.86	NA	NA	NA	NA	NA	Selenomonas	Selenomonas ruminantium subsp. lactilytica TAM6421	Degradation.C1-COMPOUNDS.CO2-Fixation.Autotrophic-CO2-Fixation.Reductive-TCA-Cycles.P42-PWY.	https://metacyc.org/META/new-image?type=PATHWAY&object=P42-PWY
142	pectin degradation I	2/714	0.5	0.5	NA	NA	NA	NA	NA	Selenomonas, Enterococcus	Enterococcus gallinarum FDAARGOS_163, Selenomonas ruminantium subsp. lactilytica TAM6421	Glycan-Glycan-Degradation.PWY-7246./Degradation.Polymer-Degradation.POLYSACCHARIDES-DEG.Glycan-Degradation.PWY-7246./Degradation.Polymer-Degradation.POLYSACCHARIDES-DEG.Pectin-Degradation.PWY-7246./Degradation.Carbohydrates-Degradation.POLYSACCHARIDES-DEG.Glycan-Degradation.PWY-7246./Degradation.Carbohydrates-Degradation.POLYSACCHARIDES-DEG.Pectin-Degradation.PWY-7246.	https://metacyc.org/META/new-image?type=PATHWAY&object=PWY-7246
143	galactitol degradation	5/714	0.8	4	NA	NA	NA	NA	NA	Selenomonas, Lactobacillus, Enterococcus	Enterococcus sp. FDAARGOS_375, Selenomonas ruminantium subsp. lactilytica TAM6421, Lactobacillus paracasei LC355, Lactobacillus paracasei SRCM103299, Lactobacillus paracasei 10266	Degradation.SECONDARY-METABOLITE-DEGRADATION.Sugar-Derivatives.SUGAR-ALCOHOLS-DEG.GALACTITOLCAT-PWY.	https://metacyc.org/META/new-image?type=PATHWAY&object=GALACTITOLCAT-PWY
144	NAD biosynthesis from 2-amino-3-carboxymuconate semialdehyde	25/714	0.5	0.5	NA	NA	NA	NA	NA	Selenomonas, Lactobacillus, Enterococcus	Enterococcus durans BDGP3, Selenomonas ruminantium subsp. lactilytica TAM6421, Lactobacillus parabuchneri FAM21731, Lactobacillus delbrueckii subsp. indicus, Lactobacillus helveticus MB2-1, Lactobacillus helveticus D76, Lactobacillus helveticus D75, Lactobacillus helveticus CAUH18, Lactobacillus helveticus H9, Lactobacillus plantarum RI-113, Lactobacillus plantarum TMW 1.1478, Lactobacillus plant…	Biosynthesis.Cofactor-Biosynthesis.NAD-Metabolism.NAD-SYN.PWY-5653.	https://metacyc.org/META/new-image?type=PATHWAY&object=PWY-5653
145	L-phenylalanine biosynthesis II	51/714	0.33	0.33	NA	NA	NA	NA	NA	Selenomonas, Lactobacillus, Lactococcus, Enterococcus	Enterococcus faecalis V583, Selenomonas ruminantium subsp. lactilytica TAM6421, Lactococcus lactis subsp. cremoris A76, Lactobacillus plantarum subsp. plantarum NC8, Lactobacillus plantarum WJL, Lactobacillus plantarum KP, Lactobacillus plantarum DF, Lactobacillus plantarum C410L1, Lactobacillus plantarum MF1298, Lactobacillus plantarum LP2, Lactobacillus plantarum BLS41, Lactobacillus plantarum …	Biosynthesis.Amino-Acid-Biosynthesis.IND-AMINO-ACID-SYN.PHENYLALANINE-SYN.PWY-3462.	https://metacyc.org/META/new-image?type=PATHWAY&object=PWY-3462
146	NADH to cytochrome bd oxidase electron transfer II	152/714	0.5	1	NA	NA	NA	NA	NA	Selenomonas, Lactobacillus, Lactococcus, Enterococcus	Enterococcus faecalis ATCC 29212, Enterococcus faecalis D32, Enterococcus faecalis str. Symbioflor 1, Enterococcus faecalis DENG1, Enterococcus faecalis FDAARGOS_324, Enterococcus faecalis TY1, Enterococcus faecalis LD33, Enterococcus faecalis KB1, Enterococcus faecalis L12, Enterococcus faecalis CLB21560, Enterococcus faecalis sorialis, Enterococcus faecalis FDAARGOS_338, Enterococcus faecalis O…	Energy-Metabolism.Respiration.AEROBIC-RESPIRATION.PWY0-1568./Energy-Metabolism.Electron-Transfer.PWY0-1568.	https://metacyc.org/META/new-image?type=PATHWAY&object=PWY0-1568
147	NADH to cytochrome bo oxidase electron transfer II	154/714	0.5	1	NA	NA	NA	NA	NA	Selenomonas, Lactobacillus, Lactococcus, Enterococcus	Enterococcus faecalis ATCC 29212, Enterococcus faecalis D32, Enterococcus faecalis str. Symbioflor 1, Enterococcus faecalis DENG1, Enterococcus faecalis FDAARGOS_324, Enterococcus faecalis TY1, Enterococcus faecalis LD33, Enterococcus faecalis KB1, Enterococcus faecalis L12, Enterococcus faecalis CLB21560, Enterococcus faecalis sorialis, Enterococcus faecalis FDAARGOS_338, Enterococcus faecalis O…	Energy-Metabolism.Respiration.AEROBIC-RESPIRATION.PWY0-1567./Energy-Metabolism.Electron-Transfer.PWY0-1567.	https://metacyc.org/META/new-image?type=PATHWAY&object=PWY0-1567
148	glycerol-3-phosphate to fumarate electron transfer	25/714	0.5	0.5	NA	NA	NA	NA	NA	Selenomonas, Lactobacillus, Lactococcus, Enterococcus, Selenomonas sputigena	Enterococcus faecium DO, Selenomonas sputigena ATCC 35185, Selenomonas ruminantium subsp. lactilytica TAM6421, Lactococcus lactis IL6288, Lactococcus lactis IL1403, Lactococcus lactis subsp. cremoris 158, Lactococcus lactis subsp. cremoris UC109, Lactococcus lactis subsp. cremoris JM1, Lactococcus lactis subsp. cremoris JM2, Lactococcus lactis subsp. lactis 229, Lactococcus lactis subsp. lactis 2…	Energy-Metabolism.Respiration.ANAEROBIC-RESPIRATION.PWY0-1582./Energy-Metabolism.Electron-Transfer.PWY0-1582.	https://metacyc.org/META/new-image?type=PATHWAY&object=PWY0-1582
149	succinate to cytochrome bd oxidase electron transfer	80/714	1.0	1.5	NA	NA	NA	NA	NA	Selenomonas, Lactobacillus, Lactococcus, Enterococcus, Selenomonas sputigena	Enterococcus sp. CR-Ec1, Enterococcus casseliflavus EC-369, Selenomonas sp. oral taxon 920 W5150, Selenomonas sputigena ATCC 35185, Selenomonas sp. oral taxon 478 F0592, Selenomonas sp. oral taxon 136 F0591, Selenomonas ruminantium subsp. lactilytica TAM6421, Lactococcus lactis IL6288, Lactococcus lactis IL1403, Lactococcus lactis subsp. cremoris 158, Lactococcus lactis subsp. cremoris UC109, Lac…	Energy-Metabolism.Respiration.AEROBIC-RESPIRATION.PWY0-1353./Energy-Metabolism.Electron-Transfer.PWY0-1353.	https://metacyc.org/META/new-image?type=PATHWAY&object=PWY0-1353
150	nitrate reduction IX (dissimilatory)	47/714	0.5	0.5	NA	NA	NA	NA	NA	Selenomonas, Lactobacillus, Lactococcus, Enterococcus, Selenomonas sputigena	Enterococcus faecium DO, Selenomonas sputigena ATCC 35185, Selenomonas ruminantium subsp. lactilytica TAM6421, Lactococcus lactis IL6288, Lactococcus lactis IL1403, Lactococcus lactis subsp. cremoris 158, Lactococcus lactis subsp. cremoris UC109, Lactococcus lactis subsp. cremoris JM1, Lactococcus lactis subsp. cremoris JM2, Lactococcus lactis subsp. lactis 229, Lactococcus lactis subsp. lactis 2…	Degradation.Noncarbon-Nutrients.NITROGEN-DEG.Nitrate-Reduction.PWY0-1581./Energy-Metabolism.Respiration.ANAEROBIC-RESPIRATION.PWY0-1581./Energy-Metabolism.Electron-Transfer.PWY0-1581.	https://metacyc.org/META/new-image?type=PATHWAY&object=PWY0-1581
151	glycerol-3-phosphate to hydrogen peroxide electron transport	25/714	0.5	0.5	NA	NA	NA	NA	NA	Selenomonas, Lactobacillus, Lactococcus, Enterococcus, Selenomonas sputigena	Enterococcus faecium DO, Selenomonas sputigena ATCC 35185, Selenomonas ruminantium subsp. lactilytica TAM6421, Lactococcus lactis IL6288, Lactococcus lactis IL1403, Lactococcus lactis subsp. cremoris 158, Lactococcus lactis subsp. cremoris UC109, Lactococcus lactis subsp. cremoris JM1, Lactococcus lactis subsp. cremoris JM2, Lactococcus lactis subsp. lactis 229, Lactococcus lactis subsp. lactis 2…	Energy-Metabolism.Electron-Transfer.PWY0-1591.	https://metacyc.org/META/new-image?type=PATHWAY&object=PWY0-1591
152	succinate to cytochrome bo oxidase electron transfer	66/714	1.0	2	NA	NA	NA	NA	NA	Selenomonas, Lactobacillus, Lactococcus, Enterococcus, Selenomonas sputigena	Enterococcus sp. CR-Ec1, Enterococcus casseliflavus EC-369, Selenomonas sp. oral taxon 920 W5150, Selenomonas sputigena ATCC 35185, Selenomonas sp. oral taxon 478 F0592, Selenomonas sp. oral taxon 136 F0591, Selenomonas ruminantium subsp. lactilytica TAM6421, Lactococcus lactis IL6288, Lactococcus lactis IL1403, Lactococcus lactis subsp. cremoris 158, Lactococcus lactis subsp. cremoris UC109, Lac…	Energy-Metabolism.Respiration.AEROBIC-RESPIRATION.PWY0-1329./Energy-Metabolism.Electron-Transfer.PWY0-1329.	https://metacyc.org/META/new-image?type=PATHWAY&object=PWY0-1329
153	glycerol-3-phosphate to cytochrome bo oxidase electron transfer	25/714	1.0	1.5	NA	NA	NA	NA	NA	Selenomonas, Lactobacillus, Lactococcus, Enterococcus, Selenomonas sputigena	Enterococcus faecium DO, Selenomonas sputigena ATCC 35185, Selenomonas ruminantium subsp. lactilytica TAM6421, Lactococcus lactis IL6288, Lactococcus lactis IL1403, Lactococcus lactis subsp. cremoris 158, Lactococcus lactis subsp. cremoris UC109, Lactococcus lactis subsp. cremoris JM1, Lactococcus lactis subsp. cremoris JM2, Lactococcus lactis subsp. lactis 229, Lactococcus lactis subsp. lactis 2…	Energy-Metabolism.Respiration.AEROBIC-RESPIRATION.PWY0-1561./Energy-Metabolism.Electron-Transfer.PWY0-1561.	https://metacyc.org/META/new-image?type=PATHWAY&object=PWY0-1561
154	nitrate reduction V (assimilatory)	24/714	0.5	0.75	NA	NA	NA	NA	NA	Selenomonas, Lactobacillus, Lactococcus, Selenomonas sputigena	Selenomonas sputigena ATCC 35185, Selenomonas ruminantium subsp. lactilytica TAM6421, Lactococcus sp. 1JSPR-7, Lactobacillus pentosus ZFM222, Lactobacillus pentosus ZFM94, Lactobacillus plantarum FBL-3a, Lactobacillus plantarum SRCM103295, Lactobacillus plantarum IRG1, Lactobacillus plantarum UNQLp11, Lactobacillus plantarum subsp. plantarum TS12, Lactobacillus plantarum subsp. plantarum BNH17, L…	Degradation.Noncarbon-Nutrients.NITROGEN-DEG.Nitrate-Reduction.PWY-5675.	https://metacyc.org/META/new-image?type=PATHWAY&object=PWY-5675
155	nitrate reduction VIIIb (dissimilatory)	24/714	0.5	0.5	NA	NA	NA	NA	NA	Selenomonas, Lactobacillus, Lactococcus, Selenomonas sputigena	Selenomonas sputigena ATCC 35185, Selenomonas ruminantium subsp. lactilytica TAM6421, Lactococcus sp. 1JSPR-7, Lactobacillus pentosus ZFM222, Lactobacillus pentosus ZFM94, Lactobacillus plantarum FBL-3a, Lactobacillus plantarum SRCM103295, Lactobacillus plantarum IRG1, Lactobacillus plantarum UNQLp11, Lactobacillus plantarum subsp. plantarum TS12, Lactobacillus plantarum subsp. plantarum BNH17, L…	Degradation.Noncarbon-Nutrients.NITROGEN-DEG.Nitrate-Reduction.PWY0-1573./Energy-Metabolism.Respiration.ANAEROBIC-RESPIRATION.PWY0-1573./Energy-Metabolism.Electron-Transfer.PWY0-1573.	https://metacyc.org/META/new-image?type=PATHWAY&object=PWY0-1573
156	putrescine biosynthesis III	184/714	1.0	1	NA	NA	NA	NA	NA	Selenomonas, Lactobacillus, Megasphaera, Dialister pneumosintes	Selenomonas ruminantium subsp. lactilytica TAM6421, Dialister pneumosintes F0677, Lactobacillus ginsenosidimutans EMML 3041, Lactobacillus heilongjiangensis DSM 28069, Lactobacillus jensenii SNUV360, Lactobacillus jensenii 115-3-CHN, Lactobacillus acidophilus La-14, Lactobacillus acidophilus FSI4, Lactobacillus acidophilus ATCC 53544, Lactobacillus acidophilus LA1, Lactobacillus acidophilus DSM 2…	Biosynthesis.Polyamine-Biosynthesis.Putrescine-Biosynthesis.PWY-46.	https://metacyc.org/META/new-image?type=PATHWAY&object=PWY-46
157	D-gluconate degradation	596/714	1.0	1	NA	NA	NA	NA	NA	Selenomonas, Lactobacillus, Megasphaera, Lactococcus, Enterococcus	Enterococcus faecalis EnGen0107, Enterococcus faecalis ATCC 29212, Enterococcus faecalis D32, Enterococcus faecalis str. Symbioflor 1, Enterococcus faecalis DENG1, Enterococcus faecalis FDAARGOS_324, Enterococcus faecalis TY1, Enterococcus faecalis FDAARGOS_528, Enterococcus faecalis KUB3006, Enterococcus faecalis KUB3007, Enterococcus faecalis CVM N48037F, Enterococcus faecalis CVM N60443F, Ente…	Degradation.CARBOXYLATES-DEG.GLUCONSUPER-PWY.	https://metacyc.org/META/new-image?type=PATHWAY&object=GLUCONSUPER-PWY
158	UDP-&alpha;-D-glucuronate biosynthesis (from UDP-glucose)	5/714	1.0	1	NA	NA	NA	NA	NA	Selenomonas, Lactococcus, Enterococcus	Enterococcus faecium WEFA23, Enterococcus faecium DO, Enterococcus sp. CR-Ec1, Selenomonas ruminantium subsp. lactilytica TAM6421, Lactococcus lactis subsp. cremoris JM3	Biosynthesis.Carbohydrates-Biosynthesis.CARBO-BIOSYNTHESIS.SUGAR-NUCLEOTIDES.UDP-Sugar-Biosynthesis.PWY-7346.	https://metacyc.org/META/new-image?type=PATHWAY&object=PWY-7346
159	CMP-pseudaminate biosynthesis	7/714	0.67	0.67	NA	NA	NA	NA	NA	Selenomonas, Lactococcus, Enterococcus, Selenomonas sputigena	Enterococcus hirae ATCC 9790, Enterococcus mundtii QU 25, Selenomonas sp. oral taxon 920 W5150, Selenomonas sputigena ATCC 35185, Selenomonas sp. oral taxon 478 F0592, Selenomonas ruminantium subsp. lactilytica TAM6421, Lactococcus lactis subsp. cremoris A76, Selenomonas sputigena ATCC 35185	Biosynthesis.Carbohydrates-Biosynthesis.CARBO-BIOSYNTHESIS.SUGAR-NUCLEOTIDES.CMP-Sugar-Biosynthesis.PWY-6143.	https://metacyc.org/META/new-image?type=PATHWAY&object=PWY-6143
160	hydrogen to dimethyl sulfoxide electron transfer	5/714	0.5	0.75	NA	NA	NA	NA	NA	Selenomonas, Selenomonas sputigena	Selenomonas sp. oral taxon 920 W5150, Selenomonas sputigena ATCC 35185, Selenomonas sp. oral taxon 478 F0592, Selenomonas sp. oral taxon 136 F0591, Selenomonas ruminantium subsp. lactilytica TAM6421, Selenomonas sputigena ATCC 35185	Energy-Metabolism.Respiration.ANAEROBIC-RESPIRATION.PWY0-1577./Energy-Metabolism.Electron-Transfer.PWY0-1577.	https://metacyc.org/META/new-image?type=PATHWAY&object=PWY0-1577
161	hydrogen to trimethylamine N-oxide electron transfer	5/714	0.5	0.75	NA	NA	NA	NA	NA	Selenomonas, Selenomonas sputigena	Selenomonas sp. oral taxon 920 W5150, Selenomonas sputigena ATCC 35185, Selenomonas sp. oral taxon 478 F0592, Selenomonas sp. oral taxon 136 F0591, Selenomonas ruminantium subsp. lactilytica TAM6421, Selenomonas sputigena ATCC 35185	Energy-Metabolism.Respiration.ANAEROBIC-RESPIRATION.PWY0-1578./Energy-Metabolism.Electron-Transfer.PWY0-1578.	https://metacyc.org/META/new-image?type=PATHWAY&object=PWY0-1578
162	hydrogen to fumarate electron transfer	5/714	0.75	1.25	NA	NA	NA	NA	NA	Selenomonas, Selenomonas sputigena	Selenomonas sp. oral taxon 920 W5150, Selenomonas sputigena ATCC 35185, Selenomonas sp. oral taxon 478 F0592, Selenomonas sp. oral taxon 136 F0591, Selenomonas ruminantium subsp. lactilytica TAM6421, Selenomonas sputigena ATCC 35185	Energy-Metabolism.Respiration.ANAEROBIC-RESPIRATION.PWY0-1576./Energy-Metabolism.Electron-Transfer.PWY0-1576.	https://metacyc.org/META/new-image?type=PATHWAY&object=PWY0-1576
163	nitrate reduction X (dissimilatory, periplasmic)	2/714	0.67	1.33	NA	NA	NA	NA	NA	Selenomonas, Selenomonas sputigena	Selenomonas sputigena ATCC 35185, Selenomonas ruminantium subsp. lactilytica TAM6421, Selenomonas sputigena ATCC 35185	Degradation.Noncarbon-Nutrients.NITROGEN-DEG.Nitrate-Reduction.PWY0-1584./Energy-Metabolism.Respiration.ANAEROBIC-RESPIRATION.PWY0-1584./Energy-Metabolism.Electron-Transfer.PWY0-1584.	https://metacyc.org/META/new-image?type=PATHWAY&object=PWY0-1584
164	Calvin-Benson-Bassham cycle	1/714	0.62	0.69	NA	NA	NA	NA	NA	Selenomonas, Selenomonas sputigena	Selenomonas sputigena ATCC 35185, Selenomonas sputigena ATCC 35185	Degradation.C1-COMPOUNDS.CO2-Fixation.Autotrophic-CO2-Fixation.CALVIN-PWY./Energy-Metabolism.Photosynthesis.CALVIN-PWY./Biosynthesis.Carbohydrates-Biosynthesis.CARBO-BIOSYNTHESIS.CALVIN-PWY.	https://metacyc.org/META/new-image?type=PATHWAY&object=CALVIN-PWY

## Sheet: Auto-incr_Firmicutes_Pathways
No.	Metabolic.Pathway	Present.in.X.org..Total.org.	Median.score	Median.frequency	Target.taxonomies	Strain.with.the.Pathway	Pathway.Hierarchy
1	methylerythritol phosphate pathway II	1/714	1.0	1.33	Blautia	Blautia sp. SC05B48	Biosynthesis.SECONDARY-METABOLITE-BIOSYNTHESIS.Terpenoid-Biosynthesis.ISOPRENOIDS.Isopentenyl-Diphosphate-Biosynthesis.MEP-PWY-7560.
2	L-tyrosine biosynthesis III	1/714	0.33	0.33	Eubacterium rectale CAG:36	Eubacterium rectale CAG 36	Biosynthesis.Amino-Acid-Biosynthesis.IND-AMINO-ACID-SYN.TYROSINE-SYN.PWY-6120.
3	L-tyrosine biosynthesis II	1/714	0.33	0.33	Eubacterium rectale CAG:36	Eubacterium rectale CAG 36	Biosynthesis.Amino-Acid-Biosynthesis.IND-AMINO-ACID-SYN.TYROSINE-SYN.PWY-3461.
4	2-methylcitrate cycle II	1/714	0.17	0.17	Flavonifractor	Flavonifractor plautii YL31	Degradation.CARBOXYLATES-DEG.Propionate-Degradation.Methyl-Citrate-Cycle.PWY-5747.
5	phosphatidylcholine biosynthesis V	1/714	0.33	0.33	Flavonifractor	Flavonifractor plautii YL31	Biosynthesis.Lipid-Biosynthesis.Phospholipid-Biosynthesis.PhosphatidylcholineBiosynthesis.PWY-6825.
6	2-methylcitrate cycle I	1/714	0.2	0.2	Flavonifractor	Flavonifractor plautii YL31	Degradation.CARBOXYLATES-DEG.Propionate-Degradation.Methyl-Citrate-Cycle.PWY0-42.
7	penicillin K biosynthesis	1/714	1.0	4	Lachnoclostridium	Clostridium symbiosum ATCC 14940	Biosynthesis.SECONDARY-METABOLITE-BIOSYNTHESIS.Antibiotic-Biosynthesis.PWY-5630.
8	benzoyl-CoA degradation II (anaerobic)	1/714	0.17	0.5	Lachnoclostridium	[Clostridium] saccharolyticum WM1	Degradation.AROMATIC-COMPOUNDS-DEGRADATION.Benzoyl-CoA-Degradation.CENTBENZCOA-PWY.
9	benzoyl-CoA degradation III (anaerobic)	1/714	0.11	0.33	Lachnoclostridium	[Clostridium] saccharolyticum WM1	Degradation.AROMATIC-COMPOUNDS-DEGRADATION.Benzoyl-CoA-Degradation.P321-PWY.
10	L-tryptophan degradation II (via pyruvate)	2/714	1.0	1	Lachnoclostridium	Clostridium citroniae WAL-17108, [Clostridium] saccharolyticum WM1	Degradation.Amino-Acid-Degradation.Proteinogenic-Amino-Acids-Degradation.TRYPTOPHAN-DEG.TRYPDEG-PWY.
11	L-threitol degradation	1/714	0.25	0.25	Lachnoclostridium	[Clostridium] scindens ATCC 35704	Degradation.SECONDARY-METABOLITE-DEGRADATION.Sugar-Derivatives.SUGAR-ALCOHOLS-DEG.PWY-7787.
12	erythritol degradation II	1/714	0.33	0.33	Lachnoclostridium	[Clostridium] scindens ATCC 35704	Degradation.SECONDARY-METABOLITE-DEGRADATION.Sugar-Derivatives.SUGAR-ALCOHOLS-DEG.Erythritol-Degradation.PWY-7788.
13	D-malate degradation	1/714	1.0	1	Lachnoclostridium	Clostridium symbiosum ATCC 14940	Degradation.CARBOXYLATES-DEG.PWY0-1465.
14	phenylacetate degradation II (anaerobic)	3/714	0.33	1	Lachnoclostridium	Clostridium citroniae WAL-17108, Lachnoclostridium phytofermentans ISDg, [Clostridium] hylemonae DSM 15053	Degradation.AROMATIC-COMPOUNDS-DEGRADATION.Phenolic-Compounds-Degradation.Phenylacetate-Degradation.PWY-1341.
15	(4S)-carveol and (4S)-dihydrocarveol degradation	1/714	0.14	0.14	Lachnoclostridium	Clostridium symbiosum ATCC 14940	Degradation.SECONDARY-METABOLITE-DEGRADATION.TERPENOID-DEG.Carveol-Degradation.PWY-5927.
16	glycogen degradation I	1/714	1.0	1.29	Lachnoclostridium	[Clostridium] cf. saccharolyticum K10	Glycan-Glycan-Degradation.GLYCOCAT-PWY./Degradation.Polymer-Degradation.POLYSACCHARIDES-DEG.Glycan-Degradation.GLYCOCAT-PWY./Degradation.Polymer-Degradation.POLYSACCHARIDES-DEG.Glycogen-Degradation.GLYCOCAT-PWY./Degradation.Carbohydrates-Degradation.POLYSACCHARIDES-DEG.Glycan-Degradation.GLYCOCAT-PWY./Degradation.Carbohydrates-Degradation.POLYSACCHARIDES-DEG.Glycogen-Degradation.GLYCOCAT-PWY.
17	L-arginine degradation IV (arginine decarboxylase/agmatine deiminase pathway)	1/714	1.0	1.33	Lachnoclostridium	[Clostridium] saccharolyticum WM1	Degradation.Amino-Acid-Degradation.Proteinogenic-Amino-Acids-Degradation.ARGININE-DEG.ARGDEG-III-PWY.
18	sulfoacetate degradation	1/714	0.5	0.5	Lachnoclostridium	[Clostridium] hylemonae DSM 15053	Degradation.Noncarbon-Nutrients.Sulfur-Metabolism.PWY-6593.
19	aminopropylcadaverine biosynthesis	3/714	0.5	0.5	Lachnoclostridium, Eubacterium rectale CAG:36	Eubacterium rectale CAG 36, Clostridium symbiosum ATCC 14940, Lachnoclostridium phytofermentans ISDg	Biosynthesis.Polyamine-Biosynthesis.PWY0-1303.
20	L-lysine fermentation to acetate and butanoate	3/714	0.4	0.6	Lachnoclostridium, Flavonifractor	Lachnoclostridium phytofermentans ISDg, [Clostridium] saccharolyticum WM1, Flavonifractor plautii YL31	Degradation.CARBOXYLATES-DEG.Acetate-Formation.P163-PWY./Degradation.Amino-Acid-Degradation.Proteinogenic-Amino-Acids-Degradation.LYSINE-DEG.P163-PWY./Energy-Metabolism.Fermentation.Fermentation-to-Acids.Acetate-Formation.P163-PWY./Energy-Metabolism.Fermentation.Fermentation-to-Acids.Acetyl-CoA-Butyrate.P163-PWY.
21	pyruvate fermentation to butanol I	4/714	0.31	0.69	Lachnoclostridium, Flavonifractor, Eubacterium rectale CAG:36	Eubacterium rectale CAG 36, Clostridium symbiosum ATCC 14940, Clostridium citroniae WAL-17108, Flavonifractor plautii YL31	Energy-Metabolism.Fermentation.Pyruvate-Degradation.Pyruvate-Butanol-Fermentation.PWY-6583./Energy-Metabolism.Fermentation.Alcohol-Biosynthesis.Pyruvate-Butanol-Fermentation.PWY-6583./Energy-Metabolism.Fermentation.Alcohol-Biosynthesis.PWY-6583.

## Sheet: Cancer-incr_Proteobact_Pathways
No.	Metabolic.Pathway	Present.in.X.org..Total.org.	Median.score	Median.frequency	Target.taxonomies	Strain.with.the.Pathway	Pathway.Hierarchy
1	polyhydroxybutanoate biosynthesis	1/1514	1.0	3.33	Aquabacterium	Aquabacterium olei NBRC 110486	Biosynthesis.Storage-Compounds-Biosynthesis.PWY1-3.
2	4-hydroxyacetophenone degradation	1/1514	0.2	0.4	Aquabacterium	Aquabacterium olei NBRC 110486	Degradation.AROMATIC-COMPOUNDS-DEGRADATION.PWY-7002.
3	cyanate degradation	786/1514	0.67	1	Aquabacterium, Escherichia coli, Klebsiella	Escherichia coli PCN033, Escherichia coli O104:H4 TY-2482, Escherichia coli O104:H4 FDAARGOS_348, Escherichia coli O104:H4 FDAARGOS_349, Escherichia coli O104:H4 FWSEC0009, Escherichia coli O104:H4 LB226692, Escherichia coli O157 180-PT54, Escherichia coli O157 644-PT8, Escherichia coli O157 FDAARGOS_293, Escherichia coli O157 Al Ain, Escherichia coli O157 AR-0430, Escherichia coli O157 AR-0429, …
4	L-cysteine biosynthesis VII (from S-sulfo-L-cysteine)	879/1514	0.5	0.75	Aquabacterium, Escherichia coli, Klebsiella, Morganella	Escherichia coli PCN033, Escherichia coli O104:H4 FDAARGOS_348, Escherichia coli O104:H4 FDAARGOS_349, Escherichia coli O104:H4 FWSEC0009, Escherichia coli O157 180-PT54, Escherichia coli O157 644-PT8, Escherichia coli O157 FDAARGOS_293, Escherichia coli O157 Al Ain, Escherichia coli O157 AR-0430, Escherichia coli O157 AR-0429, Escherichia coli O157 AR-0428, Escherichia coli O157 AR-0427, Escheri…
5	muropeptide degradation	1260/1514	1.0	1	Aquabacterium, Escherichia coli, Klebsiella, Morganella, Proteus	Escherichia coli PCN033, Escherichia coli O104:H4 FDAARGOS_348, Escherichia coli O104:H4 FDAARGOS_349, Escherichia coli O104:H4 FWSEC0009, Escherichia coli O157 180-PT54, Escherichia coli O157 644-PT8, Escherichia coli O157 FDAARGOS_293, Escherichia coli O157 Al Ain, Escherichia coli O157 AR-0430, Escherichia coli O157 AR-0429, Escherichia coli O157 AR-0428, Escherichia coli O157 AR-0427, Escheri…
6	octane oxidation	3/1514	0.4	2.2	Aquabacterium, Klebsiella	Aquabacterium olei NBRC 110486, Klebsiella oxytoca FDAARGOS_335, Klebsiella pneumoniae CG43	Degradation.Other-Degradation.P221-PWY.
7	benzoate degradation I (aerobic)	455/1514	1.0	1	Aquabacterium, Klebsiella	Aquabacterium olei NBRC 110486, Klebsiella michiganensis KNU07, Klebsiella sp. D5A, Klebsiella quasipneumoniae subsp. similipneumoniae G747, Klebsiella quasipneumoniae subsp. similipneumoniae ATCC 700603, Klebsiella quasipneumoniae CAV1947, Klebsiella quasipneumoniae L22, Klebsiella quasipneumoniae D120-1, Klebsiella quasipneumoniae A708, Klebsiella quasipneumoniae SNI47, Klebsiella quasipneumoni…	Degradation.AROMATIC-COMPOUNDS-DEGRADATION.Benzoate-Degradation.PWY-2503.
8	sulfolactate degradation I	1/1514	0.5	0.75	Bilophila wadsworthia	Bilophila wadsworthia 3_1_6	Degradation.Noncarbon-Nutrients.Sulfur-Metabolism.Sulfolactate-Degradation.PWY-6616.
9	superpathway of &beta;-D-glucuronosides degradation	76/1514	1.0	1.2	Bilophila wadsworthia, Escherichia coli, Klebsiella	Escherichia coli NA114, Escherichia coli O104:H4 TY-2482, Escherichia coli O104:H4 LB226692, Escherichia coli UMNF18, Escherichia coli J96, Escherichia coli ATCC 25922, Escherichia coli JJ1886, Escherichia coli O157:H7 str. EDL933, Escherichia coli CFT073, Escherichia coli 042, Escherichia coli str. K-12 substr. DH10B, Escherichia coli ETEC H10407, Escherichia coli str. K-12 substr. W3110, Escher…	Degradation.SECONDARY-METABOLITE-DEGRADATION.Sugar-Derivatives.SUGAR-ACIDS-DEG.D-Glucuronate-Degradation.GLUCUROCAT-PWY./Degradation.CARBOXYLATES-DEG.SUGAR-ACIDS-DEG.D-Glucuronate-Degradation.GLUCUROCAT-PWY./Super-GLUCUROCAT-PWY.
10	pyruvate oxidation pathway	74/1514	1.0	1	Bilophila wadsworthia, Escherichia coli, Klebsiella	Escherichia coli NA114, Escherichia coli O104:H4 TY-2482, Escherichia coli UMNF18, Escherichia coli J96, Escherichia coli ATCC 25922, Escherichia coli JJ1886, Escherichia coli O157:H7 str. EDL933, Escherichia coli CFT073, Escherichia coli 042, Escherichia coli str. K-12 substr. DH10B, Escherichia coli ETEC H10407, Escherichia coli str. K-12 substr. W3110, Escherichia coli Nissle 1917, Escherichia…	Energy-Metabolism.Electron-Transfer.PYRUVOX-PWY.
11	cellulose and hemicellulose degradation (cellulolosome)	1/1514	0.33	0.67	Delftia	Delftia sp. Cs1-4	Degradation.Polymer-Degradation.POLYSACCHARIDES-DEG.Cellulose-Degradation.PWY-6784./Degradation.Carbohydrates-Degradation.POLYSACCHARIDES-DEG.Cellulose-Degradation.PWY-6784./Metabolic-Clusters.PWY-6784.
12	neurosporene biosynthesis	1/1514	0.4	0.8	Delftia	Delftia acidovorans SPH-1	Biosynthesis.SECONDARY-METABOLITE-BIOSYNTHESIS.Terpenoid-Biosynthesis.TETRATERPENOID-SYN.C40-Carotenoids-Biosynthesis.PWY-6287./Biosynthesis.SECONDARY-METABOLITE-BIOSYNTHESIS.Terpenoid-Biosynthesis.CAROTENOID-SYN.C40-Carotenoids-Biosynthesis.PWY-6287.
13	erythromycin D biosynthesis	1/1514	0.25	0.25	Delftia	Delftia sp. Cs1-4	Biosynthesis.SECONDARY-METABOLITE-BIOSYNTHESIS.Antibiotic-Biosynthesis.Macrolides-Biosynthesis.PWY-7106.
14	fluoroacetate degradation	1/1514	1.0	1	Delftia	Delftia acidovorans SPH-1	Detoxification.PWY-6646.
15	limonene degradation I (D-limonene)	1/1514	0.14	0.14	Delftia	Delftia tsuruhatensis CM13	Degradation.SECONDARY-METABOLITE-DEGRADATION.TERPENOID-DEG.Limonene-Degradation.PWY-5923.
16	5,6-dimethylbenzimidazole biosynthesis I (aerobic)	3/1514	1.0	2.33	Delftia	Delftia tsuruhatensis CM13, Delftia sp. HK171, Delftia sp. Cs1-4	Biosynthesis.Cofactor-Biosynthesis.Vitamin-Biosynthesis.Cobalamin-Biosynthesis.Cobamide-De-Novo-Biosynthesis.DMB-Biosynthesis.PWY-5523.
17	1,2-dichloroethane degradation	1/1514	0.5	0.5	Delftia	Delftia acidovorans SPH-1	Degradation.CHLORINATED-COMPOUNDS-DEG.12DICHLORETHDEG-PWY.
18	3,5-dichlorocatechol degradation	3/1514	0.12	0.25	Delftia	Delftia tsuruhatensis CM13, Delftia sp. HK171, Delftia sp. Cs1-4	Degradation.CHLORINATED-COMPOUNDS-DEG.Chloroaromatic-Compounds-Degradation.Chlorocatechol-Degradation.PWY-6084./Degradation.AROMATIC-COMPOUNDS-DEGRADATION.Chloroaromatic-Compounds-Degradation.Chlorocatechol-Degradation.PWY-6084.
19	L-tyrosine biosynthesis IV	1/1514	1.0	1	Delftia	Delftia acidovorans SPH-1	Biosynthesis.Amino-Acid-Biosynthesis.IND-AMINO-ACID-SYN.TYROSINE-SYN.PWY-6134.
20	nicotinate degradation I	1/1514	0.33	0.5	Delftia	Delftia tsuruhatensis CM13	Degradation.AROMATIC-COMPOUNDS-DEGRADATION.Nicotinate-Degradation.PWY-722.
21	superpathway of erythromycin biosynthesis (without sugar biosynthesis)	1/1514	0.12	0.12	Delftia	Delftia acidovorans SPH-1	Super-PWY-6975./Biosynthesis.SECONDARY-METABOLITE-BIOSYNTHESIS.Antibiotic-Biosynthesis.Macrolides-Biosynthesis.PWY-6975.
22	sulfite oxidation IV	1/1514	1.0	1	Delftia	Delftia acidovorans SPH-1	Degradation.Noncarbon-Nutrients.Sulfur-Metabolism.Sulfite-Oxidation.PWY-5326.
23	limonene degradation II (L-limonene)	1/1514	0.14	0.14	Delftia	Delftia tsuruhatensis CM13	Degradation.SECONDARY-METABOLITE-DEGRADATION.TERPENOID-DEG.Limonene-Degradation.PWY-5924.
24	GDP-D-glycero-&alpha;-D-manno-heptose biosynthesis	1/1514	0.25	0.25	Delftia	Delftia acidovorans SPH-1	Biosynthesis.Carbohydrates-Biosynthesis.CARBO-BIOSYNTHESIS.SUGAR-NUCLEOTIDES.GDP-Sugar-Biosynthesis.PWY-6478.
25	mevalonate degradation	2/1514	1.0	2.5	Delftia	Delftia sp. Cs1-4, Delftia acidovorans SPH-1	Degradation.CARBOXYLATES-DEG.PWY-5074.
26	&beta;-alanine biosynthesis II	5/1514	0.5	0.5	Delftia, Aquabacterium	Delftia tsuruhatensis CM13, Delftia sp. HK171, Delftia sp. Cs1-4, Delftia acidovorans SPH-1, Aquabacterium olei NBRC 110486	Biosynthesis.Amino-Acid-Biosynthesis.Other-Amino-Acid-Biosynthesis.Beta-Alanine-Biosynthesis.PWY-3941.
27	heme a biosynthesis	4/1514	0.75	0.75	Delftia, Aquabacterium	Delftia tsuruhatensis CM13, Delftia sp. HK171, Delftia sp. Cs1-4, Aquabacterium olei NBRC 110486	Biosynthesis.Cofactor-Biosynthesis.Porphyrin-Compounds-Biosynthesis.HEME-SYN.PWY-7856.
28	&beta;-alanine degradation II	5/1514	0.5	0.5	Delftia, Aquabacterium	Delftia tsuruhatensis CM13, Delftia sp. HK171, Delftia sp. Cs1-4, Delftia acidovorans SPH-1, Aquabacterium olei NBRC 110486	Degradation.Amino-Acid-Degradation.MISCELLANEOUS-DEG.Beta-Alanine-Degradation.PWY-1781.
29	cholesterol degradation to androstenedione I (cholesterol oxidase)	57/1514	0.12	0.12	Delftia, Desulfovibrio, Escherichia coli, Aquabacterium, Bilophila wadsworthia, Klebsiella	Delftia acidovorans SPH-1, Escherichia coli NA114, Escherichia coli JJ1886, Escherichia coli str. K-12 substr. DH10B, Escherichia coli ETEC H10407, Escherichia coli O139:H28 str. E24377A, Escherichia coli B7A, Escherichia coli SE15, Escherichia coli BL21(DE3), Escherichia coli DH1, Escherichia coli O26:H11 str. 11368, Escherichia coli IAI1, Escherichia coli O103:H2 str. 12009, Escherichia coli O1…	Degradation.Fatty-Acid-and-Lipid-Degradation.Steroids-Degradation.Cholesterol-Degradation.PWY-6945.
30	GDP-mannose biosynthesis	1281/1514	0.75	1	Delftia, Desulfovibrio, Escherichia coli, Aquabacterium, Bilophila wadsworthia, Klebsiella	Delftia tsuruhatensis CM13, Delftia sp. HK171, Delftia sp. Cs1-4, Delftia acidovorans SPH-1, Escherichia coli PCN033, Escherichia coli NA114, Escherichia coli O104:H4 TY-2482, Escherichia coli O104:H4 FDAARGOS_348, Escherichia coli O104:H4 FDAARGOS_349, Escherichia coli O104:H4 FWSEC0009, Escherichia coli O104:H4 LB226692, Escherichia coli O157 180-PT54, Escherichia coli O157 644-PT8, Escherichia…
31	L-idonate degradation	446/1514	1.0	1.33	Delftia, Desulfovibrio, Escherichia coli, Aquabacterium, Bilophila wadsworthia, Klebsiella	Delftia acidovorans SPH-1, Escherichia coli PCN033, Escherichia coli NA114, Escherichia coli O104:H4 TY-2482, Escherichia coli O104:H4 FDAARGOS_348, Escherichia coli O104:H4 FDAARGOS_349, Escherichia coli O104:H4 FWSEC0009, Escherichia coli O104:H4 LB226692, Escherichia coli O104:H4 str. C227-11, Escherichia coli O121 str. RM8352, Escherichia coli O7:K1 str. CE10, Escherichia coli str. K-12 subst…
32	spermidine biosynthesis I	1438/1514	0.5	0.5	Delftia, Desulfovibrio, Oxalobacter, Escherichia coli, Aquabacterium, Klebsiella	Delftia tsuruhatensis CM13, Delftia sp. HK171, Delftia sp. Cs1-4, Delftia acidovorans SPH-1, Escherichia coli PCN033, Escherichia coli NA114, Escherichia coli O104:H4 TY-2482, Escherichia coli O104:H4 FDAARGOS_348, Escherichia coli O104:H4 FDAARGOS_349, Escherichia coli O104:H4 FWSEC0009, Escherichia coli O104:H4 LB226692, Escherichia coli O157 180-PT54, Escherichia coli O157 644-PT8, Escherichia…
33	L-rhamnose degradation III	2/1514	0.21	0.21	Delftia, Escherichia coli	Delftia acidovorans SPH-1, Escherichia coli JJ1886	Degradation.Carbohydrates-Degradation.Sugars-And-Polysaccharides-Degradation.L-rhamnose-Degradation.PWY-6714.
34	benzoyl-CoA degradation I (aerobic)	7/1514	0.38	0.57	Delftia, Escherichia coli	Delftia tsuruhatensis CM13, Delftia sp. HK171, Delftia sp. Cs1-4, Delftia acidovorans SPH-1, Escherichia coli NA114, Escherichia coli JJ1886, Escherichia coli SE15	Degradation.AROMATIC-COMPOUNDS-DEGRADATION.Benzoyl-CoA-Degradation.PWY-1361.
35	salicylate degradation IV	9/1514	0.2	0.2	Delftia, Escherichia coli	Delftia acidovorans SPH-1, Escherichia coli O104:H4 TY-2482, Escherichia coli O104:H4 LB226692, Escherichia coli Nissle 1917, Escherichia coli E110019, Escherichia coli F11, Escherichia coli 53638, Escherichia coli IAI39, Escherichia coli LF82	Degradation.AROMATIC-COMPOUNDS-DEGRADATION.Salicylate-Degradation.PWY-6640.
36	L-leucine degradation I	5/1514	0.67	1.5	Delftia, Escherichia coli, Aquabacterium	Delftia tsuruhatensis CM13, Delftia sp. HK171, Delftia sp. Cs1-4, Escherichia coli ATCC 25922, Aquabacterium olei NBRC 110486	Degradation.Amino-Acid-Degradation.Proteinogenic-Amino-Acids-Degradation.LEUCINE-DEG.LEU-DEG2-PWY.
37	3-oxoadipate degradation	185/1514	1.0	1.5	Delftia, Escherichia coli, Aquabacterium, Klebsiella	Delftia tsuruhatensis CM13, Delftia sp. HK171, Delftia sp. Cs1-4, Delftia acidovorans SPH-1, Escherichia coli NA114, Escherichia coli ETEC H10407, Escherichia coli SE15, Escherichia coli BL21(DE3), Escherichia coli JME67, Escherichia coli JME65, Escherichia coli JME64, Escherichia coli JME66, Escherichia coli ABU 83972, Escherichia coli 'BL21-Gold(DE3)pLysS AG', Escherichia coli O25b:H4-ST131 EC9…	Degradation.CARBOXYLATES-DEG.PWY-2361.
38	4-sulfocatechol degradation	470/1514	0.25	0.5	Delftia, Escherichia coli, Aquabacterium, Klebsiella	Delftia tsuruhatensis CM13, Delftia sp. HK171, Delftia sp. Cs1-4, Escherichia coli JME67, Escherichia coli JME65, Escherichia coli JME64, Escherichia coli JME66, Aquabacterium olei NBRC 110486, Klebsiella michiganensis M1, Klebsiella michiganensis K516, Klebsiella michiganensis K518, Klebsiella michiganensis AR375, Klebsiella michiganensis M82255, Klebsiella michiganensis KNU07, Klebsiella michig…	Degradation.AROMATIC-COMPOUNDS-DEGRADATION.Sulfoaromatics-Degradation.PWY-6041.
39	taurine degradation IV	1412/1514	1.0	1	Delftia, Escherichia coli, Aquabacterium, Klebsiella, Morganella	Delftia tsuruhatensis CM13, Delftia sp. HK171, Delftia sp. Cs1-4, Delftia acidovorans SPH-1, Escherichia coli PCN033, Escherichia coli NA114, Escherichia coli O104:H4 TY-2482, Escherichia coli O104:H4 FDAARGOS_348, Escherichia coli O104:H4 FDAARGOS_349, Escherichia coli O104:H4 FWSEC0009, Escherichia coli O104:H4 LB226692, Escherichia coli O157 180-PT54, Escherichia coli O157 644-PT8, Escherichia…
40	adenosine nucleotides degradation III	1337/1514	1.0	1	Delftia, Escherichia coli, Aquabacterium, Klebsiella, Proteus	Delftia tsuruhatensis CM13, Delftia sp. HK171, Delftia sp. Cs1-4, Escherichia coli PCN033, Escherichia coli O104:H4 FDAARGOS_348, Escherichia coli O104:H4 FDAARGOS_349, Escherichia coli O104:H4 FWSEC0009, Escherichia coli O157 180-PT54, Escherichia coli O157 644-PT8, Escherichia coli O157 FDAARGOS_293, Escherichia coli O157 Al Ain, Escherichia coli O157 AR-0430, Escherichia coli O157 AR-0429, Esc…
41	glyoxylate cycle	1371/1514	0.83	1.33	Delftia, Escherichia coli, Aquabacterium, Klebsiella, Proteus	Delftia tsuruhatensis CM13, Delftia sp. HK171, Delftia sp. Cs1-4, Escherichia coli PCN033, Escherichia coli O104:H4 FDAARGOS_348, Escherichia coli O104:H4 FDAARGOS_349, Escherichia coli O104:H4 FWSEC0009, Escherichia coli O157 180-PT54, Escherichia coli O157 644-PT8, Escherichia coli O157 FDAARGOS_293, Escherichia coli O157 Al Ain, Escherichia coli O157 AR-0430, Escherichia coli O157 AR-0429, Esc…
42	oxalate degradation II	921/1514	0.67	0.67	Delftia, Escherichia coli, Aquabacterium, Oxalobacter	Delftia sp. HK171, Delftia sp. Cs1-4, Delftia acidovorans SPH-1, Escherichia coli PCN033, Escherichia coli NA114, Escherichia coli O104:H4 TY-2482, Escherichia coli O104:H4 FDAARGOS_348, Escherichia coli O104:H4 FDAARGOS_349, Escherichia coli O104:H4 FWSEC0009, Escherichia coli O104:H4 LB226692, Escherichia coli O157 180-PT54, Escherichia coli O157 644-PT8, Escherichia coli O157 FDAARGOS_293, Esc…
43	cyanuric acid degradation II	15/1514	0.33	0.67	Delftia, Escherichia coli, Klebsiella	Delftia acidovorans SPH-1, Escherichia coli NA114, Escherichia coli UMNF18, Escherichia coli str. K-12 substr. DH10B, Escherichia coli ETEC H10407, Escherichia coli BL21(DE3), Escherichia coli J53, Escherichia coli NCTC86, Escherichia coli TW11681, Escherichia coli TW10598, Klebsiella sp. D5A, Klebsiella pneumoniae JH1, Klebsiella pneumoniae 1162281, Klebsiella pneumoniae subsp. pneumoniae DSM 30…	Degradation.AROMATIC-COMPOUNDS-DEGRADATION.Cyanurate-Degradation.PWY-5169.
44	propanoyl CoA degradation I	18/1514	0.33	0.33	Delftia, Escherichia coli, Klebsiella	Delftia sp. HK171, Delftia sp. Cs1-4, Delftia acidovorans SPH-1, Escherichia coli NA114, Escherichia coli J96, Escherichia coli JJ1886, Escherichia coli CFT073, Escherichia coli Nissle 1917, Escherichia coli F11, Escherichia coli 536, Escherichia coli UTI89, Escherichia coli APEC O1, Escherichia coli SE15, Escherichia coli DH1, Escherichia coli O127:H6 str. E2348/69, Escherichia coli S88, Escheri…	Degradation.CARBOXYLATES-DEG.Propionate-Degradation.PROPIONMET-PWY.
45	2-aminophenol degradation	11/1514	0.25	0.25	Delftia, Escherichia coli, Klebsiella	Delftia acidovorans SPH-1, Escherichia coli HS, Escherichia coli E22, Escherichia coli 53638, Escherichia coli SE11, Escherichia coli B str. REL606, Escherichia coli ATCC 8739, Escherichia coli DH1, Escherichia coli IAI1, Klebsiella pneumoniae JH1, Klebsiella pneumoniae 1162281	Degradation.AROMATIC-COMPOUNDS-DEGRADATION.PWY-6210.
46	TCA cycle II (plants and fungi)	22/1514	1.0	2.28	Delftia, Escherichia coli, Klebsiella	Delftia acidovorans SPH-1, Escherichia coli NA114, Escherichia coli ATCC 25922, Escherichia coli JJ1886, Escherichia coli Nissle 1917, Escherichia coli SE15, Escherichia coli J53, Escherichia coli S88, Escherichia coli IAI39, Escherichia coli ABU 83972, Escherichia coli 'BL21-Gold(DE3)pLysS AG', Escherichia coli TW11681, Klebsiella michiganensis KCTC 1686, Klebsiella michiganensis E718, Klebsiell…	Energy-Metabolism.TCA-VARIANTS.PWY-5690.
47	spermidine biosynthesis III	1340/1514	0.75	0.75	Delftia, Escherichia coli, Klebsiella	Delftia tsuruhatensis CM13, Delftia sp. HK171, Delftia sp. Cs1-4, Escherichia coli PCN033, Escherichia coli O104:H4 FDAARGOS_348, Escherichia coli O104:H4 FDAARGOS_349, Escherichia coli O104:H4 FWSEC0009, Escherichia coli O157 180-PT54, Escherichia coli O157 644-PT8, Escherichia coli O157 FDAARGOS_293, Escherichia coli O157 Al Ain, Escherichia coli O157 AR-0430, Escherichia coli O157 AR-0429, Esc…
48	sitosterol degradation to androstenedione	32/1514	0.11	0.11	Delftia, Escherichia coli, Klebsiella	Delftia acidovorans SPH-1, Escherichia coli NA114, Escherichia coli JJ1886, Escherichia coli str. K-12 substr. DH10B, Escherichia coli ETEC H10407, Escherichia coli O139:H28 str. E24377A, Escherichia coli B7A, Escherichia coli SE15, Escherichia coli BL21(DE3), Escherichia coli DH1, Escherichia coli O26:H11 str. 11368, Escherichia coli IAI1, Escherichia coli O103:H2 str. 12009, Escherichia coli O1…	Degradation.Fatty-Acid-and-Lipid-Degradation.Steroids-Degradation.PWY-6948.
49	L-threonine degradation III (to methylglyoxal)	1383/1514	0.67	0.67	Delftia, Escherichia coli, Klebsiella	Delftia acidovorans SPH-1, Escherichia coli PCN033, Escherichia coli O104:H4 TY-2482, Escherichia coli O104:H4 FDAARGOS_348, Escherichia coli O104:H4 FDAARGOS_349, Escherichia coli O104:H4 FWSEC0009, Escherichia coli O104:H4 LB226692, Escherichia coli O157 180-PT54, Escherichia coli O157 644-PT8, Escherichia coli O157 FDAARGOS_293, Escherichia coli O157 Al Ain, Escherichia coli O157 AR-0430, Esch…
50	L-alanine degradation II (to D-lactate)	4/1514	1.0	1.33	Delftia, Escherichia coli, Klebsiella	Delftia acidovorans SPH-1, Escherichia coli JJ1886, Escherichia coli UTI89, Klebsiella pneumoniae KCTC 2242	Degradation.Amino-Acid-Degradation.Proteinogenic-Amino-Acids-Degradation.ALANINE-DEG.ALACAT2-PWY.
51	two-component alkanesulfonate monooxygenase	569/1514	1.0	1.5	Delftia, Escherichia coli, Klebsiella	Delftia tsuruhatensis CM13, Delftia sp. HK171, Delftia sp. Cs1-4, Delftia acidovorans SPH-1, Escherichia coli NA114, Escherichia coli O104:H4 TY-2482, Escherichia coli O104:H4 FDAARGOS_348, Escherichia coli O104:H4 FDAARGOS_349, Escherichia coli O104:H4 LB226692, Escherichia coli O157 FDAARGOS_293, Escherichia coli UMNF18, Escherichia coli O103 str. RM8385, Escherichia coli O111 str. RM9322, Esch…
52	cinnamate and 3-hydroxycinnamate degradation to 2-hydroxypentadienoate	1268/1514	0.4	0.6	Delftia, Escherichia coli, Klebsiella	Delftia sp. Cs1-4, Escherichia coli PCN033, Escherichia coli O104:H4 FDAARGOS_348, Escherichia coli O104:H4 FDAARGOS_349, Escherichia coli O104:H4 FWSEC0009, Escherichia coli O157 180-PT54, Escherichia coli O157 644-PT8, Escherichia coli O157 FDAARGOS_293, Escherichia coli O157 Al Ain, Escherichia coli O157 AR-0430, Escherichia coli O157 AR-0429, Escherichia coli O157 AR-0428, Escherichia coli O1…
53	3-chlorobenzoate degradation III (via gentisate)	151/1514	0.5	0.5	Delftia, Escherichia coli, Klebsiella	Delftia acidovorans SPH-1, Escherichia coli O157 180-PT54, Escherichia coli O157 644-PT8, Escherichia coli O157 FDAARGOS_293, Escherichia coli O157 Al Ain, Escherichia coli O157 AR-0430, Escherichia coli O157 AR-0429, Escherichia coli O157 AR-0428, Escherichia coli O157 AR-0427, Escherichia coli O55:H7 str. RM12579, Escherichia coli O145 str. RM9872, Escherichia coli O145:H28 str. RM12581, Escher…	Degradation.CHLORINATED-COMPOUNDS-DEG.Chloroaromatic-Compounds-Degradation.Chlorobenzoate-Degradation.3-Chlorobenzoate-Degradation.PWY-6228./Degradation.AROMATIC-COMPOUNDS-DEGRADATION.Chloroaromatic-Compounds-Degradation.Chlorobenzoate-Degradation.3-Chlorobenzoate-Degradation.PWY-6228.
54	urate conversion to allantoin I	26/1514	0.67	0.67	Delftia, Escherichia coli, Klebsiella	Delftia acidovorans SPH-1, Escherichia coli JJ1886, Escherichia coli BL21(DE3), Escherichia coli DH1, Escherichia coli 'BL21-Gold(DE3)pLysS AG', Klebsiella michiganensis KCTC 1686, Klebsiella sp. D5A, Klebsiella variicola At-22, Klebsiella aerogenes FDAARGOS_327, Klebsiella aerogenes FDAARGOS_513, Klebsiella aerogenes FDAARGOS_152, Klebsiella aerogenes G7, Klebsiella aerogenes FDAARGOS_139, Klebs…	Degradation.AROMATIC-COMPOUNDS-DEGRADATION.Urate-Degradation.PWY-5691.
55	chlorosalicylate degradation	78/1514	0.29	0.29	Delftia, Escherichia coli, Klebsiella	Delftia tsuruhatensis CM13, Delftia sp. HK171, Delftia sp. Cs1-4, Delftia acidovorans SPH-1, Escherichia coli O145:H28 str. RM12761, Escherichia coli O157:H7 str. SS17, Escherichia coli O157:H7 str. SS52, Escherichia coli O157:H7_EC4206, Escherichia coli O157:H7_EC4045, Escherichia coli O157:H7_EC4042, Escherichia coli O157:H7 str. EC4115, Escherichia coli O157:H7_TW14588, Escherichia coli O157:H…
56	aerobactin biosynthesis	263/1514	0.25	0.25	Delftia, Escherichia coli, Klebsiella	Delftia sp. Cs1-4, Delftia acidovorans SPH-1, Escherichia coli PCN033, Escherichia coli NA114, Escherichia coli O104:H4 TY-2482, Escherichia coli O104:H4 FDAARGOS_348, Escherichia coli O104:H4 FDAARGOS_349, Escherichia coli O104:H4 FWSEC0009, Escherichia coli O104:H4 LB226692, Escherichia coli O104:H4 str. C227-11, Escherichia coli O26 str. RM8426, Escherichia coli O26 str. RM10386, Escherichia c…
57	L-lysine degradation I	76/1514	1.0	2	Delftia, Escherichia coli, Klebsiella	Delftia acidovorans SPH-1, Escherichia coli NA114, Escherichia coli O104:H4 TY-2482, Escherichia coli O104:H4 LB226692, Escherichia coli UMNF18, Escherichia coli J96, Escherichia coli ATCC 25922, Escherichia coli JJ1886, Escherichia coli O157:H7 str. EDL933, Escherichia coli CFT073, Escherichia coli 042, Escherichia coli str. K-12 substr. DH10B, Escherichia coli ETEC H10407, Escherichia coli str.…	Degradation.Amino-Acid-Degradation.Proteinogenic-Amino-Acids-Degradation.LYSINE-DEG.PWY0-461.
58	urea degradation I	86/1514	0.67	0.67	Delftia, Escherichia coli, Klebsiella	Delftia sp. Cs1-4, Delftia acidovorans SPH-1, Escherichia coli NA114, Escherichia coli UMNF18, Escherichia coli str. K-12 substr. DH10B, Escherichia coli ETEC H10407, Escherichia coli BL21(DE3), Escherichia coli DH1, Escherichia coli ECONIH4, Escherichia coli J53, Escherichia coli NCTC86, Escherichia coli 'BL21-Gold(DE3)pLysS AG', Escherichia coli TW11681, Escherichia coli TW10598, Klebsiella mic…	Degradation.AMINE-DEG.Urea-Degradation.PWY-5703.
59	methylsalicylate degradation	78/1514	1.0	1	Delftia, Escherichia coli, Klebsiella	Delftia tsuruhatensis CM13, Delftia sp. HK171, Delftia sp. Cs1-4, Delftia acidovorans SPH-1, Escherichia coli O145:H28 str. RM12761, Escherichia coli O157:H7 str. SS17, Escherichia coli O157:H7 str. SS52, Escherichia coli O157:H7_EC4206, Escherichia coli O157:H7_EC4045, Escherichia coli O157:H7_EC4042, Escherichia coli O157:H7 str. EC4115, Escherichia coli O157:H7_TW14588, Escherichia coli O157:H…
60	CO2 fixation into oxaloacetate (anaplerotic)	74/1514	1.0	1.5	Delftia, Escherichia coli, Klebsiella	Delftia acidovorans SPH-1, Escherichia coli NA114, Escherichia coli O104:H4 TY-2482, Escherichia coli O104:H4 LB226692, Escherichia coli UMNF18, Escherichia coli J96, Escherichia coli ATCC 25922, Escherichia coli JJ1886, Escherichia coli O157:H7 str. EDL933, Escherichia coli CFT073, Escherichia coli 042, Escherichia coli str. K-12 substr. DH10B, Escherichia coli ETEC H10407, Escherichia coli str.…	Degradation.C1-COMPOUNDS.CO2-Fixation.PWYQT-4429.
61	D-galactonate degradation	1270/1514	1.0	1	Delftia, Escherichia coli, Klebsiella	Delftia acidovorans SPH-1, Escherichia coli PCN033, Escherichia coli NA114, Escherichia coli O104:H4 TY-2482, Escherichia coli O104:H4 FDAARGOS_348, Escherichia coli O104:H4 FDAARGOS_349, Escherichia coli O104:H4 FWSEC0009, Escherichia coli O104:H4 LB226692, Escherichia coli O104:H4 str. C227-11, Escherichia coli UMNF18, Escherichia coli O26 str. RM8426, Escherichia coli O26 str. RM10386, Escheri…
62	chitin degradation III (Serratia)	558/1514	0.43	0.43	Delftia, Escherichia coli, Klebsiella	Delftia tsuruhatensis CM13, Escherichia coli ER2796, Escherichia coli APEC O78, Escherichia coli PCN061, Escherichia coli str. K-12 substr. MC4100, Escherichia coli KLY, Escherichia coli str. Sanji, Escherichia coli O25:NM, Escherichia coli O6:H16 2014EL-1346-6, Escherichia coli O6:H16 F6699, Escherichia coli O6:H16 M9682-C1, Escherichia coli O2:H6, Escherichia coli O15:H11, Escherichia coli O18:…	Degradation.Polymer-Degradation.POLYSACCHARIDES-DEG.Chitin-Degradation.PWY-7822./Degradation.Carbohydrates-Degradation.POLYSACCHARIDES-DEG.Chitin-Degradation.PWY-7822.
63	pentachlorophenol degradation	11/1514	0.17	0.17	Delftia, Escherichia coli, Klebsiella	Delftia sp. Cs1-4, Delftia acidovorans SPH-1, Escherichia coli ETEC H10407, Escherichia coli SE15, Escherichia coli DH1, Escherichia coli O25b:H4-ST131 EC958, Klebsiella michiganensis E718, Klebsiella variicola At-22, Klebsiella pneumoniae subsp. pneumoniae HS11286, Klebsiella pneumoniae subsp. pneumoniae 1084, Klebsiella pneumoniae JM45	Degradation.CHLORINATED-COMPOUNDS-DEG.PCPDEG-PWY.
64	L-alanine degradation I	60/1514	1.0	1.5	Delftia, Escherichia coli, Klebsiella	Delftia acidovorans SPH-1, Escherichia coli O104:H4 TY-2482, Escherichia coli O104:H4 LB226692, Escherichia coli UMNF18, Escherichia coli J96, Escherichia coli ATCC 25922, Escherichia coli O157:H7 str. EDL933, Escherichia coli CFT073, Escherichia coli 042, Escherichia coli str. K-12 substr. DH10B, Escherichia coli str. K-12 substr. W3110, Escherichia coli Nissle 1917, Escherichia coli O139:H28 st…	Degradation.Amino-Acid-Degradation.Proteinogenic-Amino-Acids-Degradation.ALANINE-DEG.ALADEG-PWY.
65	glucose degradation (oxidative)	279/1514	0.4	0.8	Delftia, Escherichia coli, Klebsiella	Delftia sp. Cs1-4, Delftia acidovorans SPH-1, Escherichia coli ETEC H10407, Escherichia coli SE15, Klebsiella michiganensis KCTC 1686, Klebsiella michiganensis RC10, Klebsiella michiganensis K516, Klebsiella michiganensis K518, Klebsiella michiganensis AR375, Klebsiella michiganensis E718, Klebsiella sp. D5A, Klebsiella quasipneumoniae subsp. similipneumoniae ATCC 700603, Klebsiella quasipneumoni…	Degradation.SECONDARY-METABOLITE-DEGRADATION.Sugar-Derivatives.SUGAR-ACIDS-DEG.DHGLUCONATE-PYR-CAT-PWY./Degradation.Carbohydrates-Degradation.Sugars-And-Polysaccharides-Degradation.DHGLUCONATE-PYR-CAT-PWY./Degradation.CARBOXYLATES-DEG.SUGAR-ACIDS-DEG.DHGLUCONATE-PYR-CAT-PWY.
66	D-glucarate degradation II	1341/1514	0.33	0.67	Delftia, Escherichia coli, Klebsiella	Delftia tsuruhatensis CM13, Delftia sp. HK171, Delftia sp. Cs1-4, Delftia acidovorans SPH-1, Escherichia coli PCN033, Escherichia coli O104:H4 FDAARGOS_348, Escherichia coli O104:H4 FDAARGOS_349, Escherichia coli O104:H4 FWSEC0009, Escherichia coli O157 180-PT54, Escherichia coli O157 644-PT8, Escherichia coli O157 FDAARGOS_293, Escherichia coli O157 Al Ain, Escherichia coli O157 AR-0430, Escheri…
67	salicylate degradation I	78/1514	1.0	1	Delftia, Escherichia coli, Klebsiella	Delftia tsuruhatensis CM13, Delftia sp. HK171, Delftia sp. Cs1-4, Delftia acidovorans SPH-1, Escherichia coli O145:H28 str. RM12761, Escherichia coli O157:H7 str. SS17, Escherichia coli O157:H7 str. SS52, Escherichia coli O157:H7_EC4206, Escherichia coli O157:H7_EC4045, Escherichia coli O157:H7_EC4042, Escherichia coli O157:H7 str. EC4115, Escherichia coli O157:H7_TW14588, Escherichia coli O157:H…
68	ketolysis	17/1514	1.0	2.67	Delftia, Escherichia coli, Klebsiella	Delftia acidovorans SPH-1, Escherichia coli NA114, Escherichia coli O139:H28 str. E24377A, Escherichia coli B7A, Escherichia coli IAI1, Escherichia coli O25b:H4-ST131 EC958, Klebsiella variicola At-22, Klebsiella pneumoniae KCTC 2242, Klebsiella pneumoniae subsp. pneumoniae Kp13, Klebsiella pneumoniae subsp. pneumoniae HS11286, Klebsiella pneumoniae subsp. pneumoniae 1084, Klebsiella pneumoniae C…	Energy-Metabolism.OTHER-ENERGY.PWY66-368.
69	D-arabitol degradation	105/1514	1.0	1.5	Delftia, Escherichia coli, Klebsiella, Morganella	Delftia sp. Cs1-4, Delftia acidovorans SPH-1, Escherichia coli ETEC H10407, Escherichia coli SEC470, Escherichia coli HST04, Escherichia coli RR1, Escherichia coli 2015C-4136CT1, Escherichia coli RM14715, Escherichia coli BH212, Escherichia coli 382634_2f, Escherichia coli O127:H6 str. E2348/69, Escherichia coli TW10598, Morganella morganii subsp. morganii KT, Morganella morganii subsp. morganii,…	Degradation.SECONDARY-METABOLITE-DEGRADATION.Sugar-Derivatives.SUGAR-ALCOHOLS-DEG.DARABITOLUTIL-PWY.
70	UMP biosynthesis II	60/1514	1.0	1.5	Delftia, Escherichia coli, Klebsiella, Morganella, Proteus	Delftia tsuruhatensis CM13, Delftia sp. HK171, Delftia sp. Cs1-4, Escherichia coli O55:H7 str. RM12579, Escherichia coli O43 str. RM10042, Escherichia coli O121 str. RM8352, Escherichia coli O104:H4 str. 2011C-3493, Escherichia coli KSC207, Escherichia coli 2015C-3107, Escherichia coli 2014C-4587, Escherichia coli 2014C-3655, Escherichia coli 2014C-3599, Escherichia coli 2014C-4423, Escherichia c…	Biosynthesis.Nucleotide-Biosynthesis.PYR-NUC-SYN.Pyrimidine-De-Novo-Biosyn.Pyrimid-Ribonucleot-De-Novo-Biosyn.UMP-Biosynthesis.PWY-7790.
71	oleate biosynthesis IV (anaerobic)	674/1514	0.71	1.5	Delftia, Escherichia coli, Klebsiella, Morganella, Proteus	Delftia tsuruhatensis CM13, Delftia sp. HK171, Delftia sp. Cs1-4, Escherichia coli PCN033, Escherichia coli O104:H4 FWSEC0009, Escherichia coli O157 180-PT54, Escherichia coli O157 644-PT8, Escherichia coli O157 Al Ain, Escherichia coli O157 AR-0430, Escherichia coli O157 AR-0429, Escherichia coli O157 AR-0428, Escherichia coli O157 AR-0427, Escherichia coli O104:H4 str. C227-11, Escherichia coli…
72	anhydromuropeptides recycling I	1457/1514	0.92	1	Delftia, Escherichia coli, Klebsiella, Morganella, Proteus	Delftia acidovorans SPH-1, Escherichia coli PCN033, Escherichia coli NA114, Escherichia coli O104:H4 TY-2482, Escherichia coli O104:H4 FDAARGOS_348, Escherichia coli O104:H4 FDAARGOS_349, Escherichia coli O104:H4 FWSEC0009, Escherichia coli O104:H4 LB226692, Escherichia coli O157 180-PT54, Escherichia coli O157 644-PT8, Escherichia coli O157 FDAARGOS_293, Escherichia coli O157 Al Ain, Escherichia…
73	D-gluconate degradation	1465/1514	1.0	1	Delftia, Escherichia coli, Klebsiella, Morganella, Proteus	Delftia tsuruhatensis CM13, Delftia sp. HK171, Delftia acidovorans SPH-1, Escherichia coli PCN033, Escherichia coli NA114, Escherichia coli O104:H4 TY-2482, Escherichia coli O104:H4 FDAARGOS_348, Escherichia coli O104:H4 FDAARGOS_349, Escherichia coli O104:H4 FWSEC0009, Escherichia coli O104:H4 LB226692, Escherichia coli O157 180-PT54, Escherichia coli O157 644-PT8, Escherichia coli O157 FDAARGOS…
74	nitrate reduction V (assimilatory)	371/1514	0.75	2.5	Delftia, Escherichia coli, Klebsiella, Morganella, Proteus	Delftia tsuruhatensis CM13, Delftia sp. HK171, Delftia sp. Cs1-4, Escherichia coli PCN033, Escherichia coli O157 Al Ain, Escherichia coli O157 AR-0430, Escherichia coli O157 AR-0429, Escherichia coli O157 AR-0428, Escherichia coli O157 AR-0427, Escherichia coli O26 str. RM8426, Escherichia coli O7:K1 str. CE10, Escherichia coli str. K-12 substr. MDS42, Escherichia coli str. K-12 substr. MDS42 MDS…
75	oleandomycin activation/inactivation	1278/1514	0.33	0.67	Delftia, Escherichia coli, Klebsiella, Morganella, Proteus	Delftia sp. HK171, Delftia sp. Cs1-4, Escherichia coli O104:H4 FDAARGOS_348, Escherichia coli O104:H4 FDAARGOS_349, Escherichia coli O104:H4 FWSEC0009, Escherichia coli O157 180-PT54, Escherichia coli O157 644-PT8, Escherichia coli O157 FDAARGOS_293, Escherichia coli O157 Al Ain, Escherichia coli O157 AR-0430, Escherichia coli O157 AR-0429, Escherichia coli O157 AR-0428, Escherichia coli O157 AR-…
76	4-hydroxyphenylacetate degradation	206/1514	0.88	0.88	Delftia, Escherichia coli, Klebsiella, Morganella, Proteus	Delftia tsuruhatensis CM13, Delftia sp. HK171, Delftia sp. Cs1-4, Delftia acidovorans SPH-1, Escherichia coli UMNF18, Escherichia coli O26 str. RM8426, Escherichia coli O111:H-, Escherichia coli HS, Escherichia coli E22, Escherichia coli 53638, Escherichia coli SE11, Escherichia coli B str. REL606, Escherichia coli BL21(DE3), Escherichia coli ATCC 8739, Escherichia coli Ecol_881, Escherichia coli…	Degradation.AROMATIC-COMPOUNDS-DEGRADATION.3-HYDROXYPHENYLACETATE-DEGRADATION-PWY.
77	glutathione-peroxide redox reactions	1458/1514	0.33	0.33	Delftia, Escherichia coli, Klebsiella, Morganella, Proteus	Delftia tsuruhatensis CM13, Delftia sp. HK171, Delftia sp. Cs1-4, Delftia acidovorans SPH-1, Escherichia coli PCN033, Escherichia coli NA114, Escherichia coli O104:H4 TY-2482, Escherichia coli O104:H4 FDAARGOS_348, Escherichia coli O104:H4 FDAARGOS_349, Escherichia coli O104:H4 FWSEC0009, Escherichia coli O104:H4 LB226692, Escherichia coli O157 180-PT54, Escherichia coli O157 644-PT8, Escherichia…
78	nitrate reduction VIIIb (dissimilatory)	485/1514	0.5	1.5	Delftia, Escherichia coli, Klebsiella, Morganella, Proteus	Delftia tsuruhatensis CM13, Delftia sp. HK171, Delftia sp. Cs1-4, Escherichia coli PCN033, Escherichia coli O157 Al Ain, Escherichia coli O157 AR-0430, Escherichia coli O157 AR-0429, Escherichia coli O157 AR-0428, Escherichia coli O157 AR-0427, Escherichia coli O26 str. RM8426, Escherichia coli O145 str. RM9872, Escherichia coli O7:K1 str. CE10, Escherichia coli str. K-12 substr. MDS42, Escherich…
79	glycolate and glyoxylate degradation I	975/1514	0.75	1	Delftia, Escherichia coli, Klebsiella, Oxalobacter	Delftia tsuruhatensis CM13, Delftia sp. HK171, Delftia sp. Cs1-4, Delftia acidovorans SPH-1, Escherichia coli PCN033, Escherichia coli NA114, Escherichia coli O104:H4 TY-2482, Escherichia coli O104:H4 FDAARGOS_348, Escherichia coli O104:H4 FDAARGOS_349, Escherichia coli O104:H4 FWSEC0009, Escherichia coli O104:H4 LB226692, Escherichia coli O157 180-PT54, Escherichia coli O157 644-PT8, Escherichia…
80	carbazole degradation	3/1514	0.25	0.25	Delftia, Klebsiella	Delftia sp. Cs1-4, Klebsiella pneumoniae 30660/NJST258_1, Klebsiella pneumoniae 30684/NJST258_2	Degradation.AROMATIC-COMPOUNDS-DEGRADATION.PWY-6550.
81	L-threitol degradation	27/1514	0.25	0.25	Delftia, Klebsiella	Delftia tsuruhatensis CM13, Delftia sp. HK171, Delftia sp. Cs1-4, Klebsiella michiganensis M1, Klebsiella michiganensis K516, Klebsiella michiganensis K518, Klebsiella michiganensis AR375, Klebsiella michiganensis M82255, Klebsiella michiganensis C52, Klebsiella michiganensis HKOPL1, Klebsiella sp. LTGPAF-6F, Klebsiella huaxiensis WCHKl090001, Klebsiella sp. FDAARGOS_511, Klebsiella oxytoca KONIH…	Degradation.SECONDARY-METABOLITE-DEGRADATION.Sugar-Derivatives.SUGAR-ALCOHOLS-DEG.PWY-7787.
82	diphenyl ethers degradation	12/1514	0.25	0.25	Delftia, Klebsiella	Delftia sp. Cs1-4, Klebsiella aerogenes AR_0161, Klebsiella aerogenes FDAARGOS_327, Klebsiella aerogenes FDAARGOS_513, Klebsiella aerogenes NCTC9735, Klebsiella aerogenes FDAARGOS_152, Klebsiella aerogenes G7, Klebsiella aerogenes FDAARGOS_139, Klebsiella aerogenes AR_0007, Klebsiella aerogenes AR_0009, Klebsiella aerogenes AR_0062, Klebsiella aerogenes EA1509E	Degradation.AROMATIC-COMPOUNDS-DEGRADATION.PWY-7747.
83	adenosylcobinamide-GDP biosynthesis from cobyrinate a,c-diamide	2/1514	0.83	1.25	Delftia, Klebsiella	Delftia tsuruhatensis CM13, Klebsiella pneumoniae AR_0117	Biosynthesis.Cofactor-Biosynthesis.Vitamin-Biosynthesis.Cobalamin-Biosynthesis.Cobamide-De-Novo-Biosynthesis.PWY-7962.
84	protocatechuate degradation I (meta-cleavage pathway)	318/1514	0.62	0.88	Delftia, Klebsiella	Delftia tsuruhatensis CM13, Delftia sp. HK171, Delftia sp. Cs1-4, Delftia acidovorans SPH-1, Klebsiella quasipneumoniae subsp. similipneumoniae ATCC 700603, Klebsiella quasipneumoniae L22, Klebsiella quasipneumoniae D120-1, Klebsiella quasipneumoniae HKUOPLA, Klebsiella quasipneumoniae HKUOPLC, Klebsiella quasipneumoniae ATCC 700603, Klebsiella quasipneumoniae HKUOPA4, Klebsiella quasipneumoniae …	Degradation.AROMATIC-COMPOUNDS-DEGRADATION.Protocatechuate-Degradation.P184-PWY.
85	malonate decarboxylase activation	214/1514	1.0	1.5	Delftia, Klebsiella	Delftia sp. HK171, Delftia sp. Cs1-4, Klebsiella michiganensis KCTC 1686, Klebsiella michiganensis E718, Klebsiella sp. D5A, Klebsiella quasipneumoniae subsp. similipneumoniae G747, Klebsiella quasipneumoniae CAV1947, Klebsiella quasipneumoniae D120-1, Klebsiella quasipneumoniae TH114, Klebsiella quasipneumoniae KP18-31, Klebsiella quasipneumoniae G4584, Klebsiella quasipneumoniae KPC142, Klebsie…	Biosynthesis.Cofactor-Biosynthesis.PWY-5796.
86	nitrilotriacetate degradation	14/1514	0.5	0.5	Delftia, Klebsiella	Delftia acidovorans SPH-1, Klebsiella michiganensis E718, Klebsiella variicola At-22, Klebsiella pneumoniae KCTC 2242, Klebsiella pneumoniae subsp. pneumoniae HS11286, Klebsiella pneumoniae subsp. pneumoniae DSM 30104, Klebsiella pneumoniae subsp. pneumoniae 1084, Klebsiella pneumoniae CG43, Klebsiella pneumoniae JM45, Klebsiella pneumoniae 30660/NJST258_1, Klebsiella pneumoniae 30684/NJST258_2, …	Degradation.CARBOXYLATES-DEG.PWY-6021.
87	sorbitol biosynthesis II	3/1514	1.0	1.33	Delftia, Klebsiella	Delftia acidovorans SPH-1, Klebsiella pneumoniae 30660/NJST258_1, Klebsiella pneumoniae 30684/NJST258_2	Biosynthesis.SECONDARY-METABOLITE-BIOSYNTHESIS.SUGAR-DERIVS.Sugar-Alcohols-Biosynthesis.Sorbitol-Biosynthesis.PWY-5530.
88	&beta;-alanine degradation I	9/1514	1.0	1.5	Delftia, Klebsiella	Delftia acidovorans SPH-1, Klebsiella michiganensis KCTC 1686, Klebsiella michiganensis E718, Klebsiella variicola At-22, Klebsiella pneumoniae KCTC 2242, Klebsiella pneumoniae subsp. pneumoniae 1084, Klebsiella pneumoniae CG43, Klebsiella pneumoniae subsp. pneumoniae MGH 78578, Klebsiella pneumoniae subsp. pneumoniae NTUH-K2044	Degradation.Amino-Acid-Degradation.MISCELLANEOUS-DEG.Beta-Alanine-Degradation.BETA-ALA-DEGRADATION-I-PWY.
89	methylgallate degradation	12/1514	0.33	0.75	Delftia, Klebsiella	Delftia acidovorans SPH-1, Klebsiella variicola At-22, Klebsiella pneumoniae KCTC 2242, Klebsiella pneumoniae subsp. pneumoniae HS11286, Klebsiella pneumoniae subsp. pneumoniae 1084, Klebsiella pneumoniae CG43, Klebsiella pneumoniae JM45, Klebsiella pneumoniae 30660/NJST258_1, Klebsiella pneumoniae 30684/NJST258_2, Klebsiella pneumoniae subsp. pneumoniae MGH 78578, Klebsiella pneumoniae subsp. pn…	Degradation.AROMATIC-COMPOUNDS-DEGRADATION.METHYLGALLATE-DEGRADATION-PWY.
90	nylon-6 oligomer degradation	15/1514	0.33	0.33	Delftia, Klebsiella	Delftia sp. Cs1-4, Delftia acidovorans SPH-1, Klebsiella variicola At-22, Klebsiella pneumoniae JH1, Klebsiella pneumoniae 1162281, Klebsiella pneumoniae KCTC 2242, Klebsiella pneumoniae subsp. pneumoniae Kp13, Klebsiella pneumoniae subsp. pneumoniae HS11286, Klebsiella pneumoniae subsp. pneumoniae 1084, Klebsiella pneumoniae CG43, Klebsiella pneumoniae JM45, Klebsiella pneumoniae 30660/NJST258_1…	Degradation.Other-Degradation.P621-PWY.
91	erythritol degradation II	27/1514	0.33	0.33	Delftia, Klebsiella	Delftia tsuruhatensis CM13, Delftia sp. HK171, Delftia sp. Cs1-4, Klebsiella michiganensis M1, Klebsiella michiganensis K516, Klebsiella michiganensis K518, Klebsiella michiganensis AR375, Klebsiella michiganensis M82255, Klebsiella michiganensis C52, Klebsiella michiganensis HKOPL1, Klebsiella sp. LTGPAF-6F, Klebsiella huaxiensis WCHKl090001, Klebsiella sp. FDAARGOS_511, Klebsiella oxytoca KONIH…	Degradation.SECONDARY-METABOLITE-DEGRADATION.Sugar-Derivatives.SUGAR-ALCOHOLS-DEG.Erythritol-Degradation.PWY-7788.
92	naphthalene degradation (aerobic)	2/1514	0.42	0.58	Delftia, Klebsiella	Delftia sp. Cs1-4, Klebsiella pneumoniae CG43	Degradation.AROMATIC-COMPOUNDS-DEGRADATION.Naphthalene-Degradation.PWY-5427.
93	putrescine biosynthesis IV	60/1514	1.0	1.25	Delftia, Klebsiella	Delftia sp. HK171, Delftia sp. Cs1-4, Klebsiella michiganensis M1, Klebsiella sp. D5A, Klebsiella variicola DX120E, Klebsiella variicola DSM 15968, Klebsiella variicola GJ1, Klebsiella variicola GJ2, Klebsiella variicola GJ3, Klebsiella aerogenes CAV1320, Klebsiella aerogenes FDAARGOS_152, Klebsiella aerogenes G7, Klebsiella aerogenes FDAARGOS_139, Klebsiella aerogenes AR_0018, Klebsiella aerogen…	Biosynthesis.Polyamine-Biosynthesis.Putrescine-Biosynthesis.PWY-6305.
94	vanillin and vanillate degradation II	12/1514	0.5	1	Delftia, Klebsiella	Delftia sp. Cs1-4, Klebsiella aerogenes FDAARGOS_327, Klebsiella aerogenes FDAARGOS_513, Klebsiella aerogenes NCTC9735, Klebsiella aerogenes FDAARGOS_152, Klebsiella aerogenes G7, Klebsiella aerogenes FDAARGOS_139, Klebsiella aerogenes FDAARGOS_363, Klebsiella aerogenes AR_0018, Klebsiella aerogenes AR_0009, Klebsiella aerogenes AR_0062, Klebsiella aerogenes EA1509E	Degradation.AROMATIC-COMPOUNDS-DEGRADATION.Vanillin-Degradation.PWY-7098.
95	3-methylthiopropanoate biosynthesis	11/1514	1.0	1	Delftia, Klebsiella	Delftia acidovorans SPH-1, Klebsiella michiganensis KCTC 1686, Klebsiella sp. D5A, Klebsiella variicola At-22, Klebsiella pneumoniae JH1, Klebsiella pneumoniae 1162281, Klebsiella pneumoniae subsp. pneumoniae DSM 30104, Klebsiella pneumoniae CG43, Klebsiella pneumoniae subsp. pneumoniae MGH 78578, Klebsiella pneumoniae subsp. pneumoniae NTUH-K2044, Klebsiella pneumoniae 342	Biosynthesis.SECONDARY-METABOLITE-BIOSYNTHESIS.S-CONTAINING-SECONDARY-CMPD-SYN.PWY-5389.
96	xylitol degradation	28/1514	1.0	1.5	Delftia, Klebsiella	Delftia tsuruhatensis CM13, Delftia sp. HK171, Delftia sp. Cs1-4, Klebsiella michiganensis M1, Klebsiella michiganensis K516, Klebsiella michiganensis K518, Klebsiella michiganensis AR375, Klebsiella michiganensis M82255, Klebsiella michiganensis C52, Klebsiella michiganensis E718, Klebsiella michiganensis HKOPL1, Klebsiella sp. LTGPAF-6F, Klebsiella huaxiensis WCHKl090001, Klebsiella sp. FDAARGO…	Degradation.SECONDARY-METABOLITE-DEGRADATION.Sugar-Derivatives.SUGAR-ALCOHOLS-DEG.LARABITOLUTIL-PWY.
97	thiazole biosynthesis II (aerobic bacteria)	4/1514	0.57	0.64	Delftia, Klebsiella, Oxalobacter	Delftia sp. Cs1-4, Klebsiella aerogenes KCTC 2190, Klebsiella oxytoca NCTC11355, Oxalobacter formigenes SSYG-15	Biosynthesis.Cofactor-Biosynthesis.Vitamin-Biosynthesis.Thiamine-Biosynthesis.Thiazole-Biosynthesis.PWY-6891.
98	D-mannose degradation	1457/1514	1.0	1	Delftia, Morganella, Desulfovibrio, Escherichia coli, Aquabacterium, Bilophila wadsworthia, Klebsiella	Delftia tsuruhatensis CM13, Delftia sp. HK171, Delftia sp. Cs1-4, Escherichia coli PCN033, Escherichia coli NA114, Escherichia coli O104:H4 TY-2482, Escherichia coli O104:H4 FDAARGOS_348, Escherichia coli O104:H4 FDAARGOS_349, Escherichia coli O104:H4 FWSEC0009, Escherichia coli O104:H4 LB226692, Escherichia coli O157 180-PT54, Escherichia coli O157 644-PT8, Escherichia coli O157 FDAARGOS_293, Es…
99	L-arginine degradation II (AST pathway)	1446/1514	0.8	1	Delftia, Morganella, Desulfovibrio, Escherichia coli, Aquabacterium, Klebsiella	Delftia sp. HK171, Delftia sp. Cs1-4, Delftia acidovorans SPH-1, Escherichia coli PCN033, Escherichia coli NA114, Escherichia coli O104:H4 TY-2482, Escherichia coli O104:H4 FDAARGOS_348, Escherichia coli O104:H4 FDAARGOS_349, Escherichia coli O104:H4 FWSEC0009, Escherichia coli O104:H4 LB226692, Escherichia coli O157 180-PT54, Escherichia coli O157 644-PT8, Escherichia coli O157 FDAARGOS_293, Esc…
100	creatinine degradation I	200/1514	0.25	0.25	Delftia, Morganella, Desulfovibrio, Escherichia coli, Bilophila wadsworthia, Klebsiella	Delftia tsuruhatensis CM13, Delftia sp. HK171, Delftia sp. Cs1-4, Delftia acidovorans SPH-1, Escherichia coli JJ1886, Escherichia coli ETEC H10407, Escherichia coli SE15, Escherichia coli DH1, Escherichia coli C11, Escherichia coli ECONIH4, Escherichia coli 13C1065T, Escherichia coli SA186, Escherichia coli ECCNB20-2, Escherichia coli 06-00048, Escherichia coli C10, Escherichia coli O103:H2 str. …	Degradation.AMINE-DEG.Creatinine-Degradation.CRNFORCAT-PWY.
101	D-galacturonate degradation I	1438/1514	0.8	1	Delftia, Morganella, Desulfovibrio, Escherichia coli, Bilophila wadsworthia, Klebsiella	Delftia tsuruhatensis CM13, Delftia sp. HK171, Delftia sp. Cs1-4, Escherichia coli PCN033, Escherichia coli NA114, Escherichia coli O104:H4 TY-2482, Escherichia coli O104:H4 FDAARGOS_348, Escherichia coli O104:H4 FDAARGOS_349, Escherichia coli O104:H4 FWSEC0009, Escherichia coli O104:H4 LB226692, Escherichia coli O157 180-PT54, Escherichia coli O157 644-PT8, Escherichia coli O157 FDAARGOS_293, Es…
102	uracil degradation I (reductive)	219/1514	0.33	0.33	Delftia, Morganella, Desulfovibrio, Oxalobacter, Escherichia coli, Aquabacterium, Bilophila wadsworthia, Klebsiella	Delftia tsuruhatensis CM13, Delftia sp. HK171, Delftia sp. Cs1-4, Delftia acidovorans SPH-1, Escherichia coli PCN033, Escherichia coli UMNF18, Escherichia coli O145 str. RM9872, Escherichia coli J96, Escherichia coli O145:H28 str. RM12581, Escherichia coli O145:H28 str. RM13514, Escherichia coli O145:H28 str. RM12761, Escherichia coli O145:H28 str. RM13516, Escherichia coli ATCC 25922, Escherichi…
103	thymine degradation	207/1514	0.33	0.33	Delftia, Morganella, Desulfovibrio, Oxalobacter, Escherichia coli, Aquabacterium, Klebsiella	Delftia tsuruhatensis CM13, Delftia sp. HK171, Delftia sp. Cs1-4, Delftia acidovorans SPH-1, Escherichia coli PCN033, Escherichia coli O145 str. RM9872, Escherichia coli O145:H28 str. RM12581, Escherichia coli O145:H28 str. RM13514, Escherichia coli O145:H28 str. RM12761, Escherichia coli O145:H28 str. RM13516, Escherichia coli O25:NM, Escherichia coli APEC O2-211, Escherichia coli O114:H49, Esch…
104	L-glutamine degradation II	797/1514	1.0	1	Delftia, Morganella, Proteus, Desulfovibrio, Escherichia coli, Aquabacterium, Bilophila wadsworthia, Klebsiella	Delftia sp. Cs1-4, Delftia acidovorans SPH-1, Escherichia coli PCN033, Escherichia coli NA114, Escherichia coli O104:H4 TY-2482, Escherichia coli O104:H4 FDAARGOS_348, Escherichia coli O104:H4 FDAARGOS_349, Escherichia coli O104:H4 FWSEC0009, Escherichia coli O104:H4 LB226692, Escherichia coli O157 Al Ain, Escherichia coli O157 AR-0430, Escherichia coli O157 AR-0429, Escherichia coli O157 AR-0428…
105	trans, trans-farnesyl diphosphate biosynthesis	1491/1514	1.0	1	Delftia, Morganella, Proteus, Desulfovibrio, Escherichia coli, Aquabacterium, Bilophila wadsworthia, Klebsiella	Delftia acidovorans SPH-1, Escherichia coli PCN033, Escherichia coli NA114, Escherichia coli O104:H4 TY-2482, Escherichia coli O104:H4 FDAARGOS_348, Escherichia coli O104:H4 FDAARGOS_349, Escherichia coli O104:H4 FWSEC0009, Escherichia coli O104:H4 LB226692, Escherichia coli O157 180-PT54, Escherichia coli O157 644-PT8, Escherichia coli O157 FDAARGOS_293, Escherichia coli O157 Al Ain, Escherichia…
106	geranyl diphosphate biosynthesis	1471/1514	1.0	1	Delftia, Morganella, Proteus, Desulfovibrio, Escherichia coli, Aquabacterium, Bilophila wadsworthia, Klebsiella	Delftia acidovorans SPH-1, Escherichia coli PCN033, Escherichia coli NA114, Escherichia coli O104:H4 TY-2482, Escherichia coli O104:H4 FDAARGOS_348, Escherichia coli O104:H4 FDAARGOS_349, Escherichia coli O104:H4 FWSEC0009, Escherichia coli O104:H4 LB226692, Escherichia coli O157 180-PT54, Escherichia coli O157 644-PT8, Escherichia coli O157 FDAARGOS_293, Escherichia coli O157 Al Ain, Escherichia…
107	androstenedione degradation	397/1514	0.24	0.4	Delftia, Morganella, Proteus, Desulfovibrio, Escherichia coli, Aquabacterium, Bilophila wadsworthia, Klebsiella	Delftia tsuruhatensis CM13, Delftia sp. HK171, Delftia sp. Cs1-4, Delftia acidovorans SPH-1, Escherichia coli NA114, Escherichia coli O26 str. RM8426, Escherichia coli O104:H4 str. 2011C-3493, Escherichia coli JJ1886, Escherichia coli PCN061, Escherichia coli O25:NM, Escherichia coli O111:H-, Escherichia coli O25:H16, Escherichia coli O16:H48 PG20180060, Escherichia coli O16:H48 PG20180054, Esche…	Degradation.Fatty-Acid-and-Lipid-Degradation.Steroids-Degradation.PWY-6944.
108	acyl carrier protein metabolism	1455/1514	1.0	1.5	Delftia, Morganella, Proteus, Desulfovibrio, Escherichia coli, Aquabacterium, Bilophila wadsworthia, Klebsiella	Delftia acidovorans SPH-1, Escherichia coli PCN033, Escherichia coli NA114, Escherichia coli O104:H4 TY-2482, Escherichia coli O104:H4 FDAARGOS_348, Escherichia coli O104:H4 FDAARGOS_349, Escherichia coli O104:H4 FWSEC0009, Escherichia coli O104:H4 LB226692, Escherichia coli O157 180-PT54, Escherichia coli O157 644-PT8, Escherichia coli O157 FDAARGOS_293, Escherichia coli O157 Al Ain, Escherichia…
109	urea degradation II	713/1514	1.0	3	Delftia, Morganella, Proteus, Desulfovibrio, Escherichia coli, Aquabacterium, Bilophila wadsworthia, Klebsiella	Delftia tsuruhatensis CM13, Delftia sp. HK171, Delftia sp. Cs1-4, Delftia acidovorans SPH-1, Escherichia coli O157 180-PT54, Escherichia coli O157 644-PT8, Escherichia coli O157 FDAARGOS_293, Escherichia coli O157 Al Ain, Escherichia coli O157 AR-0430, Escherichia coli O157 AR-0429, Escherichia coli O157 AR-0428, Escherichia coli O157 AR-0427, Escherichia coli O26 str. RM8426, Escherichia coli O2…
110	fatty acid biosynthesis initiation I	747/1514	1.0	1.33	Delftia, Morganella, Proteus, Desulfovibrio, Escherichia coli, Aquabacterium, Bilophila wadsworthia, Klebsiella	Delftia sp. HK171, Delftia sp. Cs1-4, Delftia acidovorans SPH-1, Escherichia coli NA114, Escherichia coli O104:H4 TY-2482, Escherichia coli O104:H4 LB226692, Escherichia coli O157 FDAARGOS_293, Escherichia coli UMNF18, Escherichia coli O26 str. RM10386, Escherichia coli O103 str. RM8385, Escherichia coli O111 str. RM9322, Escherichia coli O121 str. RM8352, Escherichia coli O145 str. RM9872, Esche…
111	L-glutamate biosynthesis I	797/1514	1.0	1	Delftia, Morganella, Proteus, Desulfovibrio, Escherichia coli, Aquabacterium, Bilophila wadsworthia, Klebsiella	Delftia sp. Cs1-4, Delftia acidovorans SPH-1, Escherichia coli PCN033, Escherichia coli NA114, Escherichia coli O104:H4 TY-2482, Escherichia coli O104:H4 FDAARGOS_348, Escherichia coli O104:H4 FDAARGOS_349, Escherichia coli O104:H4 FWSEC0009, Escherichia coli O104:H4 LB226692, Escherichia coli O157 Al Ain, Escherichia coli O157 AR-0430, Escherichia coli O157 AR-0429, Escherichia coli O157 AR-0428…
112	cyclopropane fatty acid (CFA) biosynthesis	1462/1514	1.0	1	Delftia, Morganella, Proteus, Desulfovibrio, Escherichia coli, Aquabacterium, Bilophila wadsworthia, Klebsiella	Delftia sp. Cs1-4, Delftia acidovorans SPH-1, Escherichia coli PCN033, Escherichia coli NA114, Escherichia coli O104:H4 TY-2482, Escherichia coli O104:H4 FDAARGOS_348, Escherichia coli O104:H4 FDAARGOS_349, Escherichia coli O104:H4 FWSEC0009, Escherichia coli O104:H4 LB226692, Escherichia coli O157 180-PT54, Escherichia coli O157 644-PT8, Escherichia coli O157 FDAARGOS_293, Escherichia coli O157 …
113	glycine cleavage	1508/1514	1.0	2	Delftia, Morganella, Proteus, Desulfovibrio, Escherichia coli, Aquabacterium, Bilophila wadsworthia, Klebsiella	Delftia tsuruhatensis CM13, Delftia sp. HK171, Delftia sp. Cs1-4, Delftia acidovorans SPH-1, Escherichia coli PCN033, Escherichia coli NA114, Escherichia coli O104:H4 TY-2482, Escherichia coli O104:H4 FDAARGOS_348, Escherichia coli O104:H4 FDAARGOS_349, Escherichia coli O104:H4 FWSEC0009, Escherichia coli O104:H4 LB226692, Escherichia coli O157 180-PT54, Escherichia coli O157 644-PT8, Escherichia…
114	nitrate reduction IV (dissimilatory)	1080/1514	1.0	1	Delftia, Morganella, Proteus, Desulfovibrio, Escherichia coli, Aquabacterium, Bilophila wadsworthia, Klebsiella	Delftia tsuruhatensis CM13, Delftia sp. HK171, Delftia sp. Cs1-4, Delftia acidovorans SPH-1, Escherichia coli PCN033, Escherichia coli NA114, Escherichia coli O104:H4 FDAARGOS_348, Escherichia coli O104:H4 FDAARGOS_349, Escherichia coli O104:H4 FWSEC0009, Escherichia coli O157 180-PT54, Escherichia coli O157 644-PT8, Escherichia coli O157 FDAARGOS_293, Escherichia coli O157 Al Ain, Escherichia co…
115	4-aminobutanoate degradation II	1336/1514	1.0	1.5	Delftia, Morganella, Proteus, Desulfovibrio, Escherichia coli, Aquabacterium, Klebsiella	Delftia tsuruhatensis CM13, Delftia acidovorans SPH-1, Escherichia coli PCN033, Escherichia coli NA114, Escherichia coli O104:H4 TY-2482, Escherichia coli O104:H4 FDAARGOS_348, Escherichia coli O104:H4 FDAARGOS_349, Escherichia coli O104:H4 FWSEC0009, Escherichia coli O104:H4 LB226692, Escherichia coli O157 180-PT54, Escherichia coli O157 644-PT8, Escherichia coli O157 FDAARGOS_293, Escherichia c…
116	NADH to cytochrome bo oxidase electron transfer II	1379/1514	0.5	3	Delftia, Morganella, Proteus, Desulfovibrio, Escherichia coli, Aquabacterium, Klebsiella	Delftia tsuruhatensis CM13, Delftia sp. HK171, Delftia sp. Cs1-4, Escherichia coli PCN033, Escherichia coli O104:H4 FDAARGOS_348, Escherichia coli O104:H4 FDAARGOS_349, Escherichia coli O104:H4 FWSEC0009, Escherichia coli O157 180-PT54, Escherichia coli O157 644-PT8, Escherichia coli O157 FDAARGOS_293, Escherichia coli O157 Al Ain, Escherichia coli O157 AR-0430, Escherichia coli O157 AR-0429, Esc…
117	4-aminobutanoate degradation I	1431/1514	1.0	1	Delftia, Morganella, Proteus, Desulfovibrio, Escherichia coli, Aquabacterium, Klebsiella	Delftia tsuruhatensis CM13, Delftia sp. HK171, Delftia sp. Cs1-4, Delftia acidovorans SPH-1, Escherichia coli PCN033, Escherichia coli NA114, Escherichia coli O104:H4 TY-2482, Escherichia coli O104:H4 FDAARGOS_348, Escherichia coli O104:H4 FDAARGOS_349, Escherichia coli O104:H4 FWSEC0009, Escherichia coli O104:H4 LB226692, Escherichia coli O157 180-PT54, Escherichia coli O157 644-PT8, Escherichia…
118	NADH to cytochrome bd oxidase electron transfer II	1378/1514	0.5	3	Delftia, Morganella, Proteus, Desulfovibrio, Escherichia coli, Aquabacterium, Klebsiella	Delftia tsuruhatensis CM13, Delftia sp. HK171, Delftia sp. Cs1-4, Escherichia coli PCN033, Escherichia coli O104:H4 FDAARGOS_348, Escherichia coli O104:H4 FDAARGOS_349, Escherichia coli O104:H4 FWSEC0009, Escherichia coli O157 180-PT54, Escherichia coli O157 644-PT8, Escherichia coli O157 FDAARGOS_293, Escherichia coli O157 Al Ain, Escherichia coli O157 AR-0430, Escherichia coli O157 AR-0429, Esc…
119	succinate to cytochrome bd oxidase electron transfer	1489/1514	1.0	4.5	Delftia, Morganella, Proteus, Desulfovibrio, Escherichia coli, Aquabacterium, Klebsiella	Delftia tsuruhatensis CM13, Delftia sp. HK171, Delftia sp. Cs1-4, Delftia acidovorans SPH-1, Escherichia coli PCN033, Escherichia coli NA114, Escherichia coli O104:H4 TY-2482, Escherichia coli O104:H4 FDAARGOS_348, Escherichia coli O104:H4 FDAARGOS_349, Escherichia coli O104:H4 FWSEC0009, Escherichia coli O104:H4 LB226692, Escherichia coli O157 180-PT54, Escherichia coli O157 644-PT8, Escherichia…
120	succinate to cytochrome bo oxidase electron transfer	1480/1514	1.0	5.5	Delftia, Morganella, Proteus, Desulfovibrio, Escherichia coli, Aquabacterium, Klebsiella	Delftia tsuruhatensis CM13, Delftia sp. HK171, Delftia sp. Cs1-4, Delftia acidovorans SPH-1, Escherichia coli PCN033, Escherichia coli NA114, Escherichia coli O104:H4 TY-2482, Escherichia coli O104:H4 FDAARGOS_348, Escherichia coli O104:H4 FDAARGOS_349, Escherichia coli O104:H4 FWSEC0009, Escherichia coli O104:H4 LB226692, Escherichia coli O157 180-PT54, Escherichia coli O157 644-PT8, Escherichia…
121	formaldehyde oxidation II (glutathione-dependent)	1466/1514	0.67	1.33	Delftia, Morganella, Proteus, Desulfovibrio, Escherichia coli, Aquabacterium, Klebsiella	Delftia tsuruhatensis CM13, Delftia sp. HK171, Delftia sp. Cs1-4, Delftia acidovorans SPH-1, Escherichia coli PCN033, Escherichia coli NA114, Escherichia coli O104:H4 TY-2482, Escherichia coli O104:H4 FDAARGOS_348, Escherichia coli O104:H4 FDAARGOS_349, Escherichia coli O104:H4 FWSEC0009, Escherichia coli O104:H4 LB226692, Escherichia coli O157 180-PT54, Escherichia coli O157 644-PT8, Escherichia…
122	L-isoleucine degradation I	450/1514	0.5	0.67	Delftia, Morganella, Proteus, Desulfovibrio, Escherichia coli, Aquabacterium, Klebsiella	Delftia tsuruhatensis CM13, Delftia sp. HK171, Delftia sp. Cs1-4, Delftia acidovorans SPH-1, Escherichia coli NA114, Escherichia coli O104:H4 TY-2482, Escherichia coli O104:H4 LB226692, Escherichia coli UMNF18, Escherichia coli O26 str. RM8426, Escherichia coli O104:H4 str. 2011C-3493, Escherichia coli J96, Escherichia coli ATCC 25922, Escherichia coli JJ1886, Escherichia coli PCN061, Escherichia…	Degradation.Amino-Acid-Degradation.Proteinogenic-Amino-Acids-Degradation.ISOLEUCINE-DEG.ILEUDEG-PWY.
123	L-proline degradation	1457/1514	0.67	0.67	Delftia, Morganella, Proteus, Desulfovibrio, Escherichia coli, Aquabacterium, Klebsiella	Delftia tsuruhatensis CM13, Delftia sp. HK171, Delftia sp. Cs1-4, Delftia acidovorans SPH-1, Escherichia coli PCN033, Escherichia coli NA114, Escherichia coli O104:H4 TY-2482, Escherichia coli O104:H4 FDAARGOS_348, Escherichia coli O104:H4 FDAARGOS_349, Escherichia coli O104:H4 FWSEC0009, Escherichia coli O104:H4 LB226692, Escherichia coli O157 180-PT54, Escherichia coli O157 644-PT8, Escherichia…
124	D-xylose degradation I	1467/1514	1.0	1	Delftia, Morganella, Proteus, Desulfovibrio, Escherichia coli, Aquabacterium, Klebsiella	Delftia tsuruhatensis CM13, Delftia sp. HK171, Delftia sp. Cs1-4, Escherichia coli PCN033, Escherichia coli NA114, Escherichia coli O104:H4 TY-2482, Escherichia coli O104:H4 FDAARGOS_348, Escherichia coli O104:H4 FDAARGOS_349, Escherichia coli O104:H4 FWSEC0009, Escherichia coli O104:H4 LB226692, Escherichia coli O157 180-PT54, Escherichia coli O157 644-PT8, Escherichia coli O157 FDAARGOS_293, Es…
125	oleate &beta;-oxidation	458/1514	0.33	0.67	Delftia, Morganella, Proteus, Desulfovibrio, Escherichia coli, Aquabacterium, Klebsiella	Delftia tsuruhatensis CM13, Delftia sp. Cs1-4, Escherichia coli NA114, Escherichia coli O104:H4 TY-2482, Escherichia coli O104:H4 LB226692, Escherichia coli UMNF18, Escherichia coli O26 str. RM8426, Escherichia coli O104:H4 str. 2011C-3493, Escherichia coli J96, Escherichia coli ATCC 25922, Escherichia coli JJ1886, Escherichia coli PCN061, Escherichia coli O25:NM, Escherichia coli O157:H7 str. ED…	Degradation.Fatty-Acid-and-Lipid-Degradation.Fatty-Acid-Degradation.PWY0-1337.
126	guanosine nucleotides degradation III	1492/1514	1.0	1.75	Delftia, Morganella, Proteus, Desulfovibrio, Escherichia coli, Aquabacterium, Klebsiella	Delftia tsuruhatensis CM13, Delftia sp. HK171, Delftia sp. Cs1-4, Delftia acidovorans SPH-1, Escherichia coli PCN033, Escherichia coli NA114, Escherichia coli O104:H4 TY-2482, Escherichia coli O104:H4 FDAARGOS_348, Escherichia coli O104:H4 FDAARGOS_349, Escherichia coli O104:H4 FWSEC0009, Escherichia coli O104:H4 LB226692, Escherichia coli O157 180-PT54, Escherichia coli O157 644-PT8, Escherichia…
127	formaldehyde oxidation VII (THF pathway)	1384/1514	0.75	0.75	Delftia, Morganella, Proteus, Desulfovibrio, Escherichia coli, Aquabacterium, Klebsiella	Delftia tsuruhatensis CM13, Delftia sp. HK171, Delftia sp. Cs1-4, Escherichia coli PCN033, Escherichia coli O104:H4 FDAARGOS_348, Escherichia coli O104:H4 FDAARGOS_349, Escherichia coli O104:H4 FWSEC0009, Escherichia coli O157 180-PT54, Escherichia coli O157 644-PT8, Escherichia coli O157 FDAARGOS_293, Escherichia coli O157 Al Ain, Escherichia coli O157 AR-0430, Escherichia coli O157 AR-0429, Esc…
128	siroheme biosynthesis	1243/1514	1.0	1.25	Delftia, Morganella, Proteus, Desulfovibrio, Escherichia coli, Bilophila wadsworthia, Klebsiella	Delftia acidovorans SPH-1, Escherichia coli PCN033, Escherichia coli NA114, Escherichia coli O104:H4 TY-2482, Escherichia coli O104:H4 FDAARGOS_348, Escherichia coli O104:H4 FDAARGOS_349, Escherichia coli O104:H4 FWSEC0009, Escherichia coli O104:H4 LB226692, Escherichia coli O157 180-PT54, Escherichia coli O157 644-PT8, Escherichia coli O157 FDAARGOS_293, Escherichia coli O157 Al Ain, Escherichia…
129	glucose and glucose-1-phosphate degradation	1491/1514	0.67	0.8	Delftia, Morganella, Proteus, Desulfovibrio, Escherichia coli, Bilophila wadsworthia, Klebsiella	Delftia sp. Cs1-4, Escherichia coli PCN033, Escherichia coli NA114, Escherichia coli O104:H4 TY-2482, Escherichia coli O104:H4 FDAARGOS_348, Escherichia coli O104:H4 FDAARGOS_349, Escherichia coli O104:H4 FWSEC0009, Escherichia coli O104:H4 LB226692, Escherichia coli O157 180-PT54, Escherichia coli O157 644-PT8, Escherichia coli O157 FDAARGOS_293, Escherichia coli O157 Al Ain, Escherichia coli O1…
130	acetate and ATP formation from acetyl-CoA I	1492/1514	1.0	2	Delftia, Morganella, Proteus, Desulfovibrio, Escherichia coli, Bilophila wadsworthia, Klebsiella	Delftia tsuruhatensis CM13, Delftia sp. HK171, Delftia sp. Cs1-4, Delftia acidovorans SPH-1, Escherichia coli PCN033, Escherichia coli NA114, Escherichia coli O104:H4 TY-2482, Escherichia coli O104:H4 FDAARGOS_348, Escherichia coli O104:H4 FDAARGOS_349, Escherichia coli O104:H4 FWSEC0009, Escherichia coli O104:H4 LB226692, Escherichia coli O157 180-PT54, Escherichia coli O157 644-PT8, Escherichia…
131	arginine dependent acid resistance	1173/1514	1.0	1	Delftia, Morganella, Proteus, Desulfovibrio, Escherichia coli, Bilophila wadsworthia, Klebsiella	Delftia sp. HK171, Delftia sp. Cs1-4, Escherichia coli PCN033, Escherichia coli NA114, Escherichia coli O104:H4 TY-2482, Escherichia coli O104:H4 FWSEC0009, Escherichia coli O104:H4 LB226692, Escherichia coli O157 180-PT54, Escherichia coli O157 644-PT8, Escherichia coli O157 Al Ain, Escherichia coli O157 AR-0430, Escherichia coli O157 AR-0429, Escherichia coli O157 AR-0428, Escherichia coli O157…
132	L-methionine biosynthesis I	1459/1514	0.86	1.14	Delftia, Morganella, Proteus, Desulfovibrio, Escherichia coli, Bilophila wadsworthia, Klebsiella	Delftia acidovorans SPH-1, Escherichia coli PCN033, Escherichia coli NA114, Escherichia coli O104:H4 TY-2482, Escherichia coli O104:H4 FDAARGOS_348, Escherichia coli O104:H4 FDAARGOS_349, Escherichia coli O104:H4 FWSEC0009, Escherichia coli O104:H4 LB226692, Escherichia coli O157 180-PT54, Escherichia coli O157 644-PT8, Escherichia coli O157 FDAARGOS_293, Escherichia coli O157 Al Ain, Escherichia…
133	hydrogen production V	1036/1514	0.5	0.5	Delftia, Morganella, Proteus, Desulfovibrio, Escherichia coli, Bilophila wadsworthia, Klebsiella	Delftia acidovorans SPH-1, Escherichia coli NA114, Escherichia coli O104:H4 TY-2482, Escherichia coli O104:H4 FDAARGOS_348, Escherichia coli O104:H4 FDAARGOS_349, Escherichia coli O104:H4 LB226692, Escherichia coli O157 FDAARGOS_293, Escherichia coli UMNF18, Escherichia coli O26 str. RM10386, Escherichia coli O103 str. RM8385, Escherichia coli O111 str. RM9322, Escherichia coli O121 str. RM8352, …
134	L-selenocysteine biosynthesis I (bacteria)	1112/1514	1.0	1	Delftia, Morganella, Proteus, Desulfovibrio, Escherichia coli, Bilophila wadsworthia, Klebsiella	Delftia tsuruhatensis CM13, Delftia sp. HK171, Delftia sp. Cs1-4, Delftia acidovorans SPH-1, Escherichia coli PCN033, Escherichia coli NA114, Escherichia coli O104:H4 TY-2482, Escherichia coli O104:H4 FWSEC0009, Escherichia coli O104:H4 LB226692, Escherichia coli O157 180-PT54, Escherichia coli O157 644-PT8, Escherichia coli O157 Al Ain, Escherichia coli O157 AR-0430, Escherichia coli O157 AR-042…
135	D-galactose degradation I (Leloir pathway)	1490/1514	0.8	1.2	Delftia, Morganella, Proteus, Desulfovibrio, Escherichia coli, Bilophila wadsworthia, Klebsiella	Delftia acidovorans SPH-1, Escherichia coli PCN033, Escherichia coli NA114, Escherichia coli O104:H4 TY-2482, Escherichia coli O104:H4 FDAARGOS_348, Escherichia coli O104:H4 FDAARGOS_349, Escherichia coli O104:H4 FWSEC0009, Escherichia coli O104:H4 LB226692, Escherichia coli O157 180-PT54, Escherichia coli O157 644-PT8, Escherichia coli O157 FDAARGOS_293, Escherichia coli O157 Al Ain, Escherichia…
136	putrescine biosynthesis I	1408/1514	1.0	1	Delftia, Morganella, Proteus, Desulfovibrio, Escherichia coli, Bilophila wadsworthia, Klebsiella	Delftia tsuruhatensis CM13, Delftia sp. HK171, Delftia sp. Cs1-4, Escherichia coli PCN033, Escherichia coli O104:H4 FDAARGOS_348, Escherichia coli O104:H4 FDAARGOS_349, Escherichia coli O104:H4 FWSEC0009, Escherichia coli O157 180-PT54, Escherichia coli O157 644-PT8, Escherichia coli O157 FDAARGOS_293, Escherichia coli O157 Al Ain, Escherichia coli O157 AR-0430, Escherichia coli O157 AR-0429, Esc…
137	8-amino-7-oxononanoate biosynthesis I	988/1514	0.82	1.36	Delftia, Morganella, Proteus, Desulfovibrio, Escherichia coli, Bilophila wadsworthia, Klebsiella	Delftia acidovorans SPH-1, Escherichia coli NA114, Escherichia coli O104:H4 TY-2482, Escherichia coli O104:H4 FDAARGOS_348, Escherichia coli O104:H4 FDAARGOS_349, Escherichia coli O104:H4 LB226692, Escherichia coli O157 FDAARGOS_293, Escherichia coli O157 Al Ain, Escherichia coli O157 AR-0430, Escherichia coli O157 AR-0429, Escherichia coli O157 AR-0428, Escherichia coli O157 AR-0427, Escherichia…
138	mixed acid fermentation	1494/1514	0.69	1.62	Delftia, Morganella, Proteus, Desulfovibrio, Escherichia coli, Bilophila wadsworthia, Klebsiella	Delftia sp. HK171, Delftia sp. Cs1-4, Delftia acidovorans SPH-1, Escherichia coli PCN033, Escherichia coli NA114, Escherichia coli O104:H4 TY-2482, Escherichia coli O104:H4 FDAARGOS_348, Escherichia coli O104:H4 FDAARGOS_349, Escherichia coli O104:H4 FWSEC0009, Escherichia coli O104:H4 LB226692, Escherichia coli O157 180-PT54, Escherichia coli O157 644-PT8, Escherichia coli O157 FDAARGOS_293, Esc…
139	pentose phosphate pathway (oxidative branch) I	969/1514	0.67	0.67	Delftia, Morganella, Proteus, Desulfovibrio, Escherichia coli, Bilophila wadsworthia, Klebsiella	Delftia acidovorans SPH-1, Escherichia coli NA114, Escherichia coli O104:H4 TY-2482, Escherichia coli O104:H4 LB226692, Escherichia coli O157 FDAARGOS_293, Escherichia coli O157 Al Ain, Escherichia coli O157 AR-0430, Escherichia coli O157 AR-0429, Escherichia coli O157 AR-0428, Escherichia coli O157 AR-0427, Escherichia coli UMNF18, Escherichia coli O26 str. RM8426, Escherichia coli O26 str. RM10…
140	L-arginine degradation III (arginine decarboxylase/agmatinase pathway)	1158/1514	1.0	1.5	Delftia, Morganella, Proteus, Desulfovibrio, Escherichia coli, Bilophila wadsworthia, Klebsiella	Delftia sp. HK171, Delftia sp. Cs1-4, Delftia acidovorans SPH-1, Escherichia coli PCN033, Escherichia coli NA114, Escherichia coli O104:H4 TY-2482, Escherichia coli O104:H4 FWSEC0009, Escherichia coli O104:H4 LB226692, Escherichia coli O157 180-PT54, Escherichia coli O157 644-PT8, Escherichia coli O157 Al Ain, Escherichia coli O157 AR-0430, Escherichia coli O157 AR-0429, Escherichia coli O157 AR-…
141	(5Z)-dodecenoate biosynthesis I	780/1514	0.83	1.5	Delftia, Morganella, Proteus, Desulfovibrio, Escherichia coli, Bilophila wadsworthia, Klebsiella	Delftia tsuruhatensis CM13, Delftia sp. HK171, Delftia sp. Cs1-4, Delftia acidovorans SPH-1, Escherichia coli PCN033, Escherichia coli NA114, Escherichia coli O104:H4 TY-2482, Escherichia coli O104:H4 FWSEC0009, Escherichia coli O104:H4 LB226692, Escherichia coli O157 180-PT54, Escherichia coli O157 644-PT8, Escherichia coli O157 Al Ain, Escherichia coli O157 AR-0430, Escherichia coli O157 AR-042…
142	NADH to cytochrome bd oxidase electron transfer I	389/1514	1.0	3.5	Delftia, Morganella, Proteus, Desulfovibrio, Escherichia coli, Klebsiella	Delftia acidovorans SPH-1, Escherichia coli NA114, Escherichia coli O104:H4 TY-2482, Escherichia coli O104:H4 LB226692, Escherichia coli O157 Al Ain, Escherichia coli O157 AR-0430, Escherichia coli O157 AR-0429, Escherichia coli O157 AR-0428, Escherichia coli O157 AR-0427, Escherichia coli UMNF18, Escherichia coli O26 str. RM8426, Escherichia coli str. K-12 substr. MDS42, Escherichia coli str. K-…
143	glycerol-3-phosphate to hydrogen peroxide electron transport	1396/1514	0.5	1.5	Delftia, Morganella, Proteus, Desulfovibrio, Escherichia coli, Klebsiella	Delftia sp. Cs1-4, Escherichia coli PCN033, Escherichia coli O104:H4 FDAARGOS_348, Escherichia coli O104:H4 FDAARGOS_349, Escherichia coli O104:H4 FWSEC0009, Escherichia coli O157 180-PT54, Escherichia coli O157 644-PT8, Escherichia coli O157 FDAARGOS_293, Escherichia coli O157 Al Ain, Escherichia coli O157 AR-0430, Escherichia coli O157 AR-0429, Escherichia coli O157 AR-0428, Escherichia coli O1…
144	D-serine degradation	1405/1514	0.67	0.67	Delftia, Morganella, Proteus, Desulfovibrio, Escherichia coli, Klebsiella	Delftia acidovorans SPH-1, Escherichia coli PCN033, Escherichia coli NA114, Escherichia coli O104:H4 TY-2482, Escherichia coli O104:H4 FDAARGOS_348, Escherichia coli O104:H4 FDAARGOS_349, Escherichia coli O104:H4 FWSEC0009, Escherichia coli O104:H4 LB226692, Escherichia coli O157 180-PT54, Escherichia coli O157 644-PT8, Escherichia coli O157 FDAARGOS_293, Escherichia coli O157 Al Ain, Escherichia…
145	tetrathionate reduction I (to thiosulfate)	83/1514	1.0	3	Delftia, Morganella, Proteus, Desulfovibrio, Escherichia coli, Klebsiella	Delftia tsuruhatensis CM13, Delftia sp. HK171, Delftia sp. Cs1-4, Escherichia coli H15, Escherichia coli KL53, Escherichia coli MS8345, Escherichia coli SCEC020023, Escherichia coli 14EC020, Escherichia coli RS571, Escherichia coli EC-129, Escherichia coli NCTC11129, Morganella morganii subsp. morganii KT, Morganella morganii subsp. morganii, Morganella morganii NCTC12028, Morganella morganii NCT…	Degradation.Noncarbon-Nutrients.Sulfur-Metabolism.Tetrathionate-Reduction.PWY-5358./Energy-Metabolism.Electron-Transfer.PWY-5358.
146	NAD salvage pathway I (PNC VI cycle)	1469/1514	0.67	0.67	Delftia, Morganella, Proteus, Desulfovibrio, Escherichia coli, Klebsiella	Delftia acidovorans SPH-1, Escherichia coli PCN033, Escherichia coli NA114, Escherichia coli O104:H4 TY-2482, Escherichia coli O104:H4 FDAARGOS_348, Escherichia coli O104:H4 FDAARGOS_349, Escherichia coli O104:H4 FWSEC0009, Escherichia coli O104:H4 LB226692, Escherichia coli O157 180-PT54, Escherichia coli O157 644-PT8, Escherichia coli O157 FDAARGOS_293, Escherichia coli O157 Al Ain, Escherichia…
147	thiosulfate disproportionation IV (rhodanese)	1471/1514	1.0	3	Delftia, Morganella, Proteus, Desulfovibrio, Escherichia coli, Klebsiella	Delftia sp. HK171, Delftia sp. Cs1-4, Escherichia coli PCN033, Escherichia coli NA114, Escherichia coli O104:H4 TY-2482, Escherichia coli O104:H4 FDAARGOS_348, Escherichia coli O104:H4 FDAARGOS_349, Escherichia coli O104:H4 FWSEC0009, Escherichia coli O104:H4 LB226692, Escherichia coli O157 180-PT54, Escherichia coli O157 644-PT8, Escherichia coli O157 FDAARGOS_293, Escherichia coli O157 Al Ain, …
148	citrate degradation	1327/1514	1.0	3	Delftia, Morganella, Proteus, Desulfovibrio, Escherichia coli, Klebsiella	Delftia tsuruhatensis CM13, Delftia sp. HK171, Delftia sp. Cs1-4, Delftia acidovorans SPH-1, Escherichia coli PCN033, Escherichia coli NA114, Escherichia coli O104:H4 TY-2482, Escherichia coli O104:H4 FDAARGOS_348, Escherichia coli O104:H4 FDAARGOS_349, Escherichia coli O104:H4 FWSEC0009, Escherichia coli O104:H4 LB226692, Escherichia coli O157 180-PT54, Escherichia coli O157 644-PT8, Escherichia…
149	pyruvate fermentation to ethanol I	1050/1514	0.67	1.33	Delftia, Morganella, Proteus, Desulfovibrio, Escherichia coli, Klebsiella	Delftia sp. Cs1-4, Escherichia coli PCN033, Escherichia coli NA114, Escherichia coli O104:H4 TY-2482, Escherichia coli O104:H4 FWSEC0009, Escherichia coli O104:H4 LB226692, Escherichia coli O157 180-PT54, Escherichia coli O157 644-PT8, Escherichia coli O157 Al Ain, Escherichia coli O157 AR-0430, Escherichia coli O157 AR-0429, Escherichia coli O157 AR-0428, Escherichia coli O157 AR-0427, Escherich…
150	phenylmercury acetate degradation	328/1514	0.5	0.5	Delftia, Morganella, Proteus, Desulfovibrio, Escherichia coli, Klebsiella	Delftia tsuruhatensis CM13, Delftia acidovorans SPH-1, Escherichia coli PCN033, Escherichia coli NA114, Escherichia coli O104:H4 TY-2482, Escherichia coli O104:H4 FDAARGOS_348, Escherichia coli O104:H4 FDAARGOS_349, Escherichia coli O104:H4 FWSEC0009, Escherichia coli O104:H4 LB226692, Escherichia coli O157 180-PT54, Escherichia coli O157 644-PT8, Escherichia coli O157 AR-0429, Escherichia coli O…	Detoxification.Mercury-Detoxification.P641-PWY.
151	nitrate reduction IX (dissimilatory)	1396/1514	0.5	1.5	Delftia, Morganella, Proteus, Desulfovibrio, Escherichia coli, Klebsiella	Delftia sp. Cs1-4, Escherichia coli PCN033, Escherichia coli O104:H4 FDAARGOS_348, Escherichia coli O104:H4 FDAARGOS_349, Escherichia coli O104:H4 FWSEC0009, Escherichia coli O157 180-PT54, Escherichia coli O157 644-PT8, Escherichia coli O157 FDAARGOS_293, Escherichia coli O157 Al Ain, Escherichia coli O157 AR-0430, Escherichia coli O157 AR-0429, Escherichia coli O157 AR-0428, Escherichia coli O1…
152	nitrate reduction III (dissimilatory)	555/1514	1.0	4	Delftia, Morganella, Proteus, Desulfovibrio, Escherichia coli, Klebsiella	Delftia tsuruhatensis CM13, Delftia sp. HK171, Delftia sp. Cs1-4, Escherichia coli PCN033, Escherichia coli NA114, Escherichia coli O104:H4 TY-2482, Escherichia coli O104:H4 LB226692, Escherichia coli O157 Al Ain, Escherichia coli O157 AR-0430, Escherichia coli O157 AR-0429, Escherichia coli O157 AR-0428, Escherichia coli O157 AR-0427, Escherichia coli UMNF18, Escherichia coli O26 str. RM8426, Es…
153	fructose degradation	1465/1514	1.0	1	Delftia, Morganella, Proteus, Desulfovibrio, Escherichia coli, Klebsiella	Delftia tsuruhatensis CM13, Delftia sp. HK171, Delftia sp. Cs1-4, Delftia acidovorans SPH-1, Escherichia coli PCN033, Escherichia coli NA114, Escherichia coli O104:H4 TY-2482, Escherichia coli O104:H4 FDAARGOS_348, Escherichia coli O104:H4 FDAARGOS_349, Escherichia coli O104:H4 FWSEC0009, Escherichia coli O104:H4 LB226692, Escherichia coli O157 180-PT54, Escherichia coli O157 644-PT8, Escherichia…
154	glycerol-3-phosphate to cytochrome bo oxidase electron transfer	1396/1514	1.0	4.5	Delftia, Morganella, Proteus, Desulfovibrio, Escherichia coli, Klebsiella	Delftia sp. Cs1-4, Escherichia coli PCN033, Escherichia coli O104:H4 FDAARGOS_348, Escherichia coli O104:H4 FDAARGOS_349, Escherichia coli O104:H4 FWSEC0009, Escherichia coli O157 180-PT54, Escherichia coli O157 644-PT8, Escherichia coli O157 FDAARGOS_293, Escherichia coli O157 Al Ain, Escherichia coli O157 AR-0430, Escherichia coli O157 AR-0429, Escherichia coli O157 AR-0428, Escherichia coli O1…
155	phosphate acquisition	1055/1514	1.0	1	Delftia, Morganella, Proteus, Desulfovibrio, Escherichia coli, Klebsiella	Delftia acidovorans SPH-1, Escherichia coli NA114, Escherichia coli O104:H4 TY-2482, Escherichia coli O104:H4 FWSEC0009, Escherichia coli O104:H4 LB226692, Escherichia coli O157 Al Ain, Escherichia coli O157 AR-0430, Escherichia coli O157 AR-0429, Escherichia coli O157 AR-0428, Escherichia coli O157 AR-0427, Escherichia coli UMNF18, Escherichia coli O26 str. RM8426, Escherichia coli O111 str. RM9…
156	glycerol degradation V	1483/1514	0.5	1	Delftia, Morganella, Proteus, Desulfovibrio, Escherichia coli, Klebsiella	Delftia acidovorans SPH-1, Escherichia coli PCN033, Escherichia coli NA114, Escherichia coli O104:H4 TY-2482, Escherichia coli O104:H4 FDAARGOS_348, Escherichia coli O104:H4 FDAARGOS_349, Escherichia coli O104:H4 FWSEC0009, Escherichia coli O104:H4 LB226692, Escherichia coli O157 180-PT54, Escherichia coli O157 644-PT8, Escherichia coli O157 FDAARGOS_293, Escherichia coli O157 Al Ain, Escherichia…
157	glycerol-3-phosphate to fumarate electron transfer	1396/1514	1.0	3.5	Delftia, Morganella, Proteus, Desulfovibrio, Escherichia coli, Klebsiella	Delftia sp. Cs1-4, Escherichia coli PCN033, Escherichia coli O104:H4 FDAARGOS_348, Escherichia coli O104:H4 FDAARGOS_349, Escherichia coli O104:H4 FWSEC0009, Escherichia coli O157 180-PT54, Escherichia coli O157 644-PT8, Escherichia coli O157 FDAARGOS_293, Escherichia coli O157 Al Ain, Escherichia coli O157 AR-0430, Escherichia coli O157 AR-0429, Escherichia coli O157 AR-0428, Escherichia coli O1…
158	NADH to cytochrome bo oxidase electron transfer I	372/1514	1.0	4	Delftia, Morganella, Proteus, Desulfovibrio, Escherichia coli, Klebsiella	Delftia acidovorans SPH-1, Escherichia coli NA114, Escherichia coli O104:H4 TY-2482, Escherichia coli O104:H4 LB226692, Escherichia coli O157 Al Ain, Escherichia coli O157 AR-0430, Escherichia coli O157 AR-0429, Escherichia coli O157 AR-0428, Escherichia coli O157 AR-0427, Escherichia coli UMNF18, Escherichia coli O26 str. RM8426, Escherichia coli str. K-12 substr. MDS42, Escherichia coli str. K-…
159	adenine and adenosine salvage I	1454/1514	1.0	1.5	Delftia, Morganella, Proteus, Desulfovibrio, Escherichia coli, Klebsiella	Delftia acidovorans SPH-1, Escherichia coli PCN033, Escherichia coli NA114, Escherichia coli O104:H4 TY-2482, Escherichia coli O104:H4 FDAARGOS_348, Escherichia coli O104:H4 FDAARGOS_349, Escherichia coli O104:H4 FWSEC0009, Escherichia coli O104:H4 LB226692, Escherichia coli O157 180-PT54, Escherichia coli O157 644-PT8, Escherichia coli O157 FDAARGOS_293, Escherichia coli O157 Al Ain, Escherichia…
160	ethanol degradation I	335/1514	1.0	2	Delftia, Morganella, Proteus, Desulfovibrio, Escherichia coli, Klebsiella	Delftia acidovorans SPH-1, Escherichia coli NA114, Escherichia coli O157 Al Ain, Escherichia coli O157 AR-0430, Escherichia coli O157 AR-0429, Escherichia coli O157 AR-0428, Escherichia coli O157 AR-0427, Escherichia coli O26 str. RM8426, Escherichia coli O121 str. RM8352, Escherichia coli str. K-12 substr. MDS42, Escherichia coli str. K-12 substr. MDS42 MDS42 substr. SynA, Escherichia coli str. …
161	L-lysine biosynthesis III	56/1514	0.86	1.29	Delftia, Morganella, Proteus, Desulfovibrio, Oxalobacter, Bilophila wadsworthia	Delftia tsuruhatensis CM13, Delftia sp. HK171, Delftia sp. Cs1-4, Delftia acidovorans SPH-1, Morganella morganii subsp. morganii KT, Morganella morganii subsp. morganii, Morganella morganii NCTC12028, Morganella morganii NCTC235, Morganella morganii, Morganella morganii FDAARGOS_63, Morganella morganii FDAARGOS_172, Morganella morganii FDAARGOS_365, Morganella morganii KC-Tt-01, Morganella morgan…	Biosynthesis.Amino-Acid-Biosynthesis.IND-AMINO-ACID-SYN.LYSINE-SYN.PWY-2942.
162	L-glutamate biosynthesis III	1506/1514	1.0	2	Delftia, Morganella, Proteus, Desulfovibrio, Oxalobacter, Escherichia coli, Aquabacterium, Bilophila wadsworthia, Klebsiella	Delftia tsuruhatensis CM13, Delftia sp. HK171, Delftia sp. Cs1-4, Delftia acidovorans SPH-1, Escherichia coli PCN033, Escherichia coli NA114, Escherichia coli O104:H4 TY-2482, Escherichia coli O104:H4 FDAARGOS_348, Escherichia coli O104:H4 FDAARGOS_349, Escherichia coli O104:H4 FWSEC0009, Escherichia coli O104:H4 LB226692, Escherichia coli O157 180-PT54, Escherichia coli O157 644-PT8, Escherichia…
163	lipoate biosynthesis and incorporation I	1504/1514	1.0	1	Delftia, Morganella, Proteus, Desulfovibrio, Oxalobacter, Escherichia coli, Aquabacterium, Bilophila wadsworthia, Klebsiella	Delftia tsuruhatensis CM13, Delftia sp. HK171, Delftia sp. Cs1-4, Delftia acidovorans SPH-1, Escherichia coli PCN033, Escherichia coli NA114, Escherichia coli O104:H4 TY-2482, Escherichia coli O104:H4 FDAARGOS_348, Escherichia coli O104:H4 FDAARGOS_349, Escherichia coli O104:H4 FWSEC0009, Escherichia coli O104:H4 LB226692, Escherichia coli O157 180-PT54, Escherichia coli O157 644-PT8, Escherichia…
164	ubiquinol-8 biosynthesis (prokaryotic)	1499/1514	0.75	0.88	Delftia, Morganella, Proteus, Desulfovibrio, Oxalobacter, Escherichia coli, Aquabacterium, Bilophila wadsworthia, Klebsiella	Delftia tsuruhatensis CM13, Delftia sp. HK171, Delftia sp. Cs1-4, Delftia acidovorans SPH-1, Escherichia coli PCN033, Escherichia coli NA114, Escherichia coli O104:H4 TY-2482, Escherichia coli O104:H4 FDAARGOS_348, Escherichia coli O104:H4 FDAARGOS_349, Escherichia coli O104:H4 FWSEC0009, Escherichia coli O104:H4 LB226692, Escherichia coli O157 180-PT54, Escherichia coli O157 644-PT8, Escherichia…
165	folate transformations I	1479/1514	0.58	0.67	Delftia, Morganella, Proteus, Desulfovibrio, Oxalobacter, Escherichia coli, Aquabacterium, Bilophila wadsworthia, Klebsiella	Delftia tsuruhatensis CM13, Delftia sp. HK171, Delftia sp. Cs1-4, Delftia acidovorans SPH-1, Escherichia coli PCN033, Escherichia coli NA114, Escherichia coli O104:H4 TY-2482, Escherichia coli O104:H4 FDAARGOS_348, Escherichia coli O104:H4 FDAARGOS_349, Escherichia coli O104:H4 FWSEC0009, Escherichia coli O104:H4 LB226692, Escherichia coli O157 180-PT54, Escherichia coli O157 644-PT8, Escherichia…
166	dTDP-L-rhamnose biosynthesis	673/1514	1.0	1.5	Delftia, Morganella, Proteus, Desulfovibrio, Oxalobacter, Escherichia coli, Aquabacterium, Bilophila wadsworthia, Klebsiella	Delftia tsuruhatensis CM13, Delftia sp. HK171, Delftia sp. Cs1-4, Delftia acidovorans SPH-1, Escherichia coli NA114, Escherichia coli UMNF18, Escherichia coli O26 str. RM8426, Escherichia coli O26 str. RM10386, Escherichia coli O7:K1 str. CE10, Escherichia coli O45:H2, Escherichia coli J96, Escherichia coli ER2796, Escherichia coli APEC IMT5155, Escherichia coli JJ1886, Escherichia coli JJ1887, E…
167	2-oxoglutarate decarboxylation to succinyl-CoA	1465/1514	1.0	1.67	Delftia, Morganella, Proteus, Desulfovibrio, Oxalobacter, Escherichia coli, Aquabacterium, Bilophila wadsworthia, Klebsiella	Delftia tsuruhatensis CM13, Delftia sp. HK171, Delftia sp. Cs1-4, Delftia acidovorans SPH-1, Escherichia coli PCN033, Escherichia coli NA114, Escherichia coli O104:H4 TY-2482, Escherichia coli O104:H4 FDAARGOS_348, Escherichia coli O104:H4 FDAARGOS_349, Escherichia coli O104:H4 FWSEC0009, Escherichia coli O104:H4 LB226692, Escherichia coli O157 180-PT54, Escherichia coli O157 644-PT8, Escherichia…
168	5-aminoimidazole ribonucleotide biosynthesis II	1065/1514	0.8	0.8	Delftia, Morganella, Proteus, Desulfovibrio, Oxalobacter, Escherichia coli, Aquabacterium, Bilophila wadsworthia, Klebsiella	Delftia tsuruhatensis CM13, Delftia sp. HK171, Delftia sp. Cs1-4, Delftia acidovorans SPH-1, Escherichia coli PCN033, Escherichia coli NA114, Escherichia coli O104:H4 TY-2482, Escherichia coli O104:H4 FDAARGOS_348, Escherichia coli O104:H4 FDAARGOS_349, Escherichia coli O104:H4 FWSEC0009, Escherichia coli O104:H4 LB226692, Escherichia coli O157 180-PT54, Escherichia coli O157 644-PT8, Escherichia…
169	phosphopantothenate biosynthesis I	1511/1514	0.75	0.75	Delftia, Morganella, Proteus, Desulfovibrio, Oxalobacter, Escherichia coli, Aquabacterium, Bilophila wadsworthia, Klebsiella	Delftia tsuruhatensis CM13, Delftia sp. HK171, Delftia sp. Cs1-4, Delftia acidovorans SPH-1, Escherichia coli PCN033, Escherichia coli NA114, Escherichia coli O104:H4 TY-2482, Escherichia coli O104:H4 FDAARGOS_348, Escherichia coli O104:H4 FDAARGOS_349, Escherichia coli O104:H4 FWSEC0009, Escherichia coli O104:H4 LB226692, Escherichia coli O157 180-PT54, Escherichia coli O157 644-PT8, Escherichia…
170	L-isoleucine biosynthesis I (from threonine)	1504/1514	0.71	1.71	Delftia, Morganella, Proteus, Desulfovibrio, Oxalobacter, Escherichia coli, Aquabacterium, Bilophila wadsworthia, Klebsiella	Delftia tsuruhatensis CM13, Delftia sp. HK171, Delftia sp. Cs1-4, Delftia acidovorans SPH-1, Escherichia coli PCN033, Escherichia coli NA114, Escherichia coli O104:H4 TY-2482, Escherichia coli O104:H4 FDAARGOS_348, Escherichia coli O104:H4 FDAARGOS_349, Escherichia coli O104:H4 FWSEC0009, Escherichia coli O104:H4 LB226692, Escherichia coli O157 180-PT54, Escherichia coli O157 644-PT8, Escherichia…
171	L-homocysteine biosynthesis	63/1514	0.5	0.5	Delftia, Morganella, Proteus, Desulfovibrio, Oxalobacter, Escherichia coli, Aquabacterium, Klebsiella	Delftia tsuruhatensis CM13, Delftia sp. HK171, Delftia sp. Cs1-4, Delftia acidovorans SPH-1, Escherichia coli ABU 83972, Aquabacterium olei NBRC 110486, Morganella morganii subsp. morganii, Morganella morganii NCTC12028, Morganella morganii, Morganella morganii FDAARGOS_172, Morganella morganii FDAARGOS_365, Morganella morganii KC-Tt-01, Morganella morganii AR_0057, Morganella morganii AR_0133, M…	Biosynthesis.Amino-Acid-Biosynthesis.Other-Amino-Acid-Biosynthesis.PWY-5344.
172	pentose phosphate pathway (non-oxidative branch)	1499/1514	1.0	1.8	Delftia, Morganella, Proteus, Desulfovibrio, Oxalobacter, Escherichia coli, Aquabacterium, Klebsiella	Delftia tsuruhatensis CM13, Delftia sp. HK171, Delftia sp. Cs1-4, Delftia acidovorans SPH-1, Escherichia coli PCN033, Escherichia coli NA114, Escherichia coli O104:H4 TY-2482, Escherichia coli O104:H4 FDAARGOS_348, Escherichia coli O104:H4 FDAARGOS_349, Escherichia coli O104:H4 FWSEC0009, Escherichia coli O104:H4 LB226692, Escherichia coli O157 180-PT54, Escherichia coli O157 644-PT8, Escherichia…
173	methylglyoxal degradation I	1477/1514	0.67	0.67	Delftia, Morganella, Proteus, Desulfovibrio, Oxalobacter, Escherichia coli, Aquabacterium, Klebsiella	Delftia tsuruhatensis CM13, Delftia sp. HK171, Delftia sp. Cs1-4, Delftia acidovorans SPH-1, Escherichia coli PCN033, Escherichia coli NA114, Escherichia coli O104:H4 TY-2482, Escherichia coli O104:H4 FDAARGOS_348, Escherichia coli O104:H4 FDAARGOS_349, Escherichia coli O104:H4 FWSEC0009, Escherichia coli O104:H4 LB226692, Escherichia coli O157 180-PT54, Escherichia coli O157 644-PT8, Escherichia…
174	adenosylcobinamide-GDP salvage from cobinamide I	1403/1514	0.8	1.2	Delftia, Morganella, Proteus, Desulfovibrio, Oxalobacter, Escherichia coli, Aquabacterium, Klebsiella	Delftia tsuruhatensis CM13, Delftia sp. HK171, Delftia sp. Cs1-4, Escherichia coli PCN033, Escherichia coli O104:H4 FDAARGOS_348, Escherichia coli O104:H4 FDAARGOS_349, Escherichia coli O104:H4 FWSEC0009, Escherichia coli O157 180-PT54, Escherichia coli O157 644-PT8, Escherichia coli O157 FDAARGOS_293, Escherichia coli O157 Al Ain, Escherichia coli O157 AR-0430, Escherichia coli O157 AR-0429, Esc…
175	lipoate biosynthesis and incorporation III (Bacillus)	1386/1514	0.67	0.67	Delftia, Morganella, Proteus, Desulfovibrio, Oxalobacter, Escherichia coli, Aquabacterium, Klebsiella	Delftia tsuruhatensis CM13, Delftia sp. HK171, Delftia sp. Cs1-4, Escherichia coli PCN033, Escherichia coli O104:H4 FDAARGOS_348, Escherichia coli O104:H4 FDAARGOS_349, Escherichia coli O104:H4 FWSEC0009, Escherichia coli O157 180-PT54, Escherichia coli O157 644-PT8, Escherichia coli O157 FDAARGOS_293, Escherichia coli O157 Al Ain, Escherichia coli O157 AR-0430, Escherichia coli O157 AR-0429, Esc…
176	glutathione biosynthesis	1480/1514	1.0	1.5	Delftia, Morganella, Proteus, Desulfovibrio, Oxalobacter, Escherichia coli, Aquabacterium, Klebsiella	Delftia tsuruhatensis CM13, Delftia sp. HK171, Delftia sp. Cs1-4, Delftia acidovorans SPH-1, Escherichia coli PCN033, Escherichia coli NA114, Escherichia coli O104:H4 TY-2482, Escherichia coli O104:H4 FDAARGOS_348, Escherichia coli O104:H4 FDAARGOS_349, Escherichia coli O104:H4 FWSEC0009, Escherichia coli O104:H4 LB226692, Escherichia coli O157 180-PT54, Escherichia coli O157 644-PT8, Escherichia…
177	acetate conversion to acetyl-CoA	1478/1514	1.0	1	Delftia, Morganella, Proteus, Desulfovibrio, Oxalobacter, Escherichia coli, Aquabacterium, Klebsiella	Delftia tsuruhatensis CM13, Delftia sp. HK171, Delftia sp. Cs1-4, Delftia acidovorans SPH-1, Escherichia coli PCN033, Escherichia coli NA114, Escherichia coli O104:H4 TY-2482, Escherichia coli O104:H4 FDAARGOS_348, Escherichia coli O104:H4 FDAARGOS_349, Escherichia coli O104:H4 FWSEC0009, Escherichia coli O104:H4 LB226692, Escherichia coli O157 180-PT54, Escherichia coli O157 644-PT8, Escherichia…
178	L-threonine degradation I	1492/1514	0.67	1.17	Delftia, Morganella, Proteus, Desulfovibrio, Oxalobacter, Escherichia coli, Aquabacterium, Klebsiella	Delftia tsuruhatensis CM13, Delftia sp. HK171, Delftia sp. Cs1-4, Escherichia coli PCN033, Escherichia coli NA114, Escherichia coli O104:H4 TY-2482, Escherichia coli O104:H4 FDAARGOS_348, Escherichia coli O104:H4 FDAARGOS_349, Escherichia coli O104:H4 FWSEC0009, Escherichia coli O104:H4 LB226692, Escherichia coli O157 180-PT54, Escherichia coli O157 644-PT8, Escherichia coli O157 FDAARGOS_293, Es…
179	N-end rule pathway I (prokaryotic)	1390/1514	1.0	1	Delftia, Morganella, Proteus, Desulfovibrio, Oxalobacter, Escherichia coli, Aquabacterium, Klebsiella	Delftia tsuruhatensis CM13, Delftia sp. HK171, Delftia sp. Cs1-4, Escherichia coli PCN033, Escherichia coli O104:H4 FDAARGOS_348, Escherichia coli O104:H4 FDAARGOS_349, Escherichia coli O104:H4 FWSEC0009, Escherichia coli O157 180-PT54, Escherichia coli O157 644-PT8, Escherichia coli O157 FDAARGOS_293, Escherichia coli O157 Al Ain, Escherichia coli O157 AR-0430, Escherichia coli O157 AR-0429, Esc…
180	acyl carrier protein activation	1405/1514	1.0	2	Delftia, Morganella, Proteus, Desulfovibrio, Oxalobacter, Escherichia coli, Aquabacterium, Klebsiella	Delftia tsuruhatensis CM13, Delftia sp. HK171, Delftia sp. Cs1-4, Escherichia coli PCN033, Escherichia coli O104:H4 FDAARGOS_348, Escherichia coli O104:H4 FDAARGOS_349, Escherichia coli O104:H4 FWSEC0009, Escherichia coli O157 180-PT54, Escherichia coli O157 644-PT8, Escherichia coli O157 FDAARGOS_293, Escherichia coli O157 Al Ain, Escherichia coli O157 AR-0430, Escherichia coli O157 AR-0429, Esc…
181	adenosylcobalamin salvage from cobalamin	1477/1514	0.6	1	Delftia, Morganella, Proteus, Desulfovibrio, Oxalobacter, Escherichia coli, Aquabacterium, Klebsiella	Delftia tsuruhatensis CM13, Delftia sp. HK171, Delftia sp. Cs1-4, Delftia acidovorans SPH-1, Escherichia coli PCN033, Escherichia coli NA114, Escherichia coli O104:H4 TY-2482, Escherichia coli O104:H4 FDAARGOS_348, Escherichia coli O104:H4 FDAARGOS_349, Escherichia coli O104:H4 FWSEC0009, Escherichia coli O104:H4 LB226692, Escherichia coli O157 180-PT54, Escherichia coli O157 644-PT8, Escherichia…
182	partial TCA cycle (obligate autotrophs)	486/1514	0.91	1.91	Delftia, Morganella, Proteus, Desulfovibrio, Oxalobacter, Escherichia coli, Bilophila wadsworthia, Klebsiella	Delftia sp. HK171, Delftia sp. Cs1-4, Delftia acidovorans SPH-1, Escherichia coli NA114, Escherichia coli O104:H4 TY-2482, Escherichia coli O104:H4 LB226692, Escherichia coli O157 Al Ain, Escherichia coli O157 AR-0430, Escherichia coli O157 AR-0429, Escherichia coli O157 AR-0428, Escherichia coli O157 AR-0427, Escherichia coli UMNF18, Escherichia coli O26 str. RM8426, Escherichia coli str. K-12 s…
183	pyruvate decarboxylation to acetyl CoA	343/1514	1.0	1	Delftia, Morganella, Proteus, Desulfovibrio, Oxalobacter, Escherichia coli, Bilophila wadsworthia, Klebsiella	Delftia sp. HK171, Delftia sp. Cs1-4, Delftia acidovorans SPH-1, Escherichia coli NA114, Escherichia coli O104:H4 TY-2482, Escherichia coli O104:H4 LB226692, Escherichia coli O157 Al Ain, Escherichia coli O157 AR-0430, Escherichia coli O157 AR-0429, Escherichia coli O157 AR-0428, Escherichia coli O157 AR-0427, Escherichia coli UMNF18, Escherichia coli O26 str. RM8426, Escherichia coli str. K-12 s…
184	ethanol degradation II	358/1514	0.67	1	Delftia, Morganella, Proteus, Desulfovibrio, Oxalobacter, Escherichia coli, Klebsiella	Delftia sp. Cs1-4, Delftia acidovorans SPH-1, Escherichia coli NA114, Escherichia coli O157 Al Ain, Escherichia coli O157 AR-0430, Escherichia coli O157 AR-0429, Escherichia coli O157 AR-0428, Escherichia coli O157 AR-0427, Escherichia coli O26 str. RM8426, Escherichia coli O121 str. RM8352, Escherichia coli str. K-12 substr. MDS42, Escherichia coli str. K-12 substr. MDS42 MDS42 substr. SynA, Esc…
185	thiazole biosynthesis I (facultative anaerobic bacteria)	1395/1514	0.71	1	Delftia, Morganella, Proteus, Desulfovibrio, Oxalobacter, Escherichia coli, Klebsiella	Delftia sp. Cs1-4, Escherichia coli PCN033, Escherichia coli O104:H4 FDAARGOS_348, Escherichia coli O104:H4 FDAARGOS_349, Escherichia coli O104:H4 FWSEC0009, Escherichia coli O157 180-PT54, Escherichia coli O157 644-PT8, Escherichia coli O157 FDAARGOS_293, Escherichia coli O157 Al Ain, Escherichia coli O157 AR-0430, Escherichia coli O157 AR-0429, Escherichia coli O157 AR-0428, Escherichia coli O1…
186	proline to cytochrome bo oxidase electron transfer	1382/1514	1.0	3.5	Delftia, Morganella, Proteus, Escherichia coli, Aquabacterium, Klebsiella	Delftia tsuruhatensis CM13, Delftia sp. HK171, Delftia sp. Cs1-4, Escherichia coli PCN033, Escherichia coli O104:H4 FDAARGOS_348, Escherichia coli O104:H4 FDAARGOS_349, Escherichia coli O104:H4 FWSEC0009, Escherichia coli O157 180-PT54, Escherichia coli O157 644-PT8, Escherichia coli O157 FDAARGOS_293, Escherichia coli O157 Al Ain, Escherichia coli O157 AR-0430, Escherichia coli O157 AR-0429, Esc…
187	nitrate reduction X (dissimilatory, periplasmic)	1022/1514	0.67	1.33	Delftia, Morganella, Proteus, Escherichia coli, Aquabacterium, Klebsiella	Delftia tsuruhatensis CM13, Delftia sp. HK171, Delftia sp. Cs1-4, Escherichia coli PCN033, Escherichia coli O104:H4 FDAARGOS_348, Escherichia coli O104:H4 FDAARGOS_349, Escherichia coli O104:H4 FWSEC0009, Escherichia coli O157 180-PT54, Escherichia coli O157 644-PT8, Escherichia coli O157 FDAARGOS_293, Escherichia coli O157 Al Ain, Escherichia coli O157 AR-0430, Escherichia coli O157 AR-0429, Esc…
188	S-methyl-5'-thioadenosine degradation IV	1431/1514	1.0	1	Delftia, Morganella, Proteus, Escherichia coli, Aquabacterium, Klebsiella	Delftia tsuruhatensis CM13, Delftia sp. HK171, Delftia sp. Cs1-4, Escherichia coli PCN033, Escherichia coli O104:H4 TY-2482, Escherichia coli O104:H4 FDAARGOS_348, Escherichia coli O104:H4 FDAARGOS_349, Escherichia coli O104:H4 FWSEC0009, Escherichia coli O104:H4 LB226692, Escherichia coli O157 180-PT54, Escherichia coli O157 644-PT8, Escherichia coli O157 FDAARGOS_293, Escherichia coli O157 Al A…
189	Entner-Doudoroff shunt	1453/1514	1.0	1	Delftia, Morganella, Proteus, Escherichia coli, Aquabacterium, Klebsiella	Delftia tsuruhatensis CM13, Delftia sp. HK171, Delftia sp. Cs1-4, Delftia acidovorans SPH-1, Escherichia coli PCN033, Escherichia coli NA114, Escherichia coli O104:H4 TY-2482, Escherichia coli O104:H4 FDAARGOS_348, Escherichia coli O104:H4 FDAARGOS_349, Escherichia coli O104:H4 FWSEC0009, Escherichia coli O104:H4 LB226692, Escherichia coli O157 180-PT54, Escherichia coli O157 644-PT8, Escherichia…
190	protein S-nitrosylation and denitrosylation	1386/1514	0.2	0.2	Delftia, Morganella, Proteus, Escherichia coli, Aquabacterium, Klebsiella	Delftia sp. HK171, Delftia sp. Cs1-4, Escherichia coli PCN033, Escherichia coli O104:H4 FDAARGOS_348, Escherichia coli O104:H4 FDAARGOS_349, Escherichia coli O104:H4 FWSEC0009, Escherichia coli O157 180-PT54, Escherichia coli O157 644-PT8, Escherichia coli O157 FDAARGOS_293, Escherichia coli O157 Al Ain, Escherichia coli O157 AR-0430, Escherichia coli O157 AR-0429, Escherichia coli O157 AR-0428, …
191	L-lysine biosynthesis I	1462/1514	0.89	1.22	Delftia, Morganella, Proteus, Oxalobacter, Escherichia coli, Aquabacterium, Klebsiella	Delftia tsuruhatensis CM13, Delftia sp. HK171, Delftia sp. Cs1-4, Delftia acidovorans SPH-1, Escherichia coli PCN033, Escherichia coli NA114, Escherichia coli O104:H4 TY-2482, Escherichia coli O104:H4 FDAARGOS_348, Escherichia coli O104:H4 FDAARGOS_349, Escherichia coli O104:H4 FWSEC0009, Escherichia coli O104:H4 LB226692, Escherichia coli O157 180-PT54, Escherichia coli O157 644-PT8, Escherichia…
192	epoxysqualene biosynthesis	7/1514	0.5	1	Delftia, Oxalobacter	Delftia tsuruhatensis CM13, Delftia sp. HK171, Delftia sp. Cs1-4, Delftia acidovorans SPH-1, Oxalobacter formigenes OXCC13, Oxalobacter formigenes SSYG-15, Oxalobacter formigenes HC-1	Biosynthesis.SECONDARY-METABOLITE-BIOSYNTHESIS.Terpenoid-Biosynthesis.TRITERPENOID-SYN.PWY-5670./Biosynthesis.Lipid-Biosynthesis.PWY-5670.
193	D-threitol degradation	32/1514	0.33	0.33	Delftia, Proteus	Delftia tsuruhatensis CM13, Delftia sp. HK171, Delftia sp. Cs1-4, Proteus hauseri 15H5D-4a, Proteus mirabilis BB2000, Proteus mirabilis HI4320, Proteus mirabilis AR_0155, Proteus mirabilis AR_0156, Proteus mirabilis T21, Proteus mirabilis T18, Proteus mirabilis BC11-24, Proteus mirabilis, Proteus mirabilis AR379, Proteus mirabilis AR_0029, Proteus mirabilis PmBC1123, Proteus mirabilis PmSC1111, P…	Degradation.SECONDARY-METABOLITE-DEGRADATION.Sugar-Derivatives.SUGAR-ALCOHOLS-DEG.PWY-7786.
194	L-alanine biosynthesis II	1416/1514	1.0	1	Delftia, Proteus, Desulfovibrio, Escherichia coli, Aquabacterium, Klebsiella	Delftia acidovorans SPH-1, Escherichia coli PCN033, Escherichia coli NA114, Escherichia coli O104:H4 TY-2482, Escherichia coli O104:H4 FDAARGOS_348, Escherichia coli O104:H4 FDAARGOS_349, Escherichia coli O104:H4 FWSEC0009, Escherichia coli O104:H4 LB226692, Escherichia coli O157 180-PT54, Escherichia coli O157 644-PT8, Escherichia coli O157 FDAARGOS_293, Escherichia coli O157 Al Ain, Escherichia…
195	selenate reduction	1387/1514	0.2	0.4	Delftia, Proteus, Desulfovibrio, Escherichia coli, Aquabacterium, Klebsiella	Delftia tsuruhatensis CM13, Delftia sp. HK171, Delftia sp. Cs1-4, Escherichia coli PCN033, Escherichia coli O104:H4 FDAARGOS_348, Escherichia coli O104:H4 FDAARGOS_349, Escherichia coli O104:H4 FWSEC0009, Escherichia coli O157 180-PT54, Escherichia coli O157 644-PT8, Escherichia coli O157 FDAARGOS_293, Escherichia coli O157 Al Ain, Escherichia coli O157 AR-0430, Escherichia coli O157 AR-0429, Esc…
196	assimilatory sulfate reduction III	29/1514	1.0	1.67	Delftia, Proteus, Desulfovibrio, Escherichia coli, Aquabacterium, Klebsiella	Delftia tsuruhatensis CM13, Delftia sp. HK171, Delftia sp. Cs1-4, Delftia acidovorans SPH-1, Escherichia coli BH100 substr. MG2017, Escherichia coli CRE1540, Escherichia coli SMN197SH3, Escherichia coli SMN152SH1, Escherichia coli SMN013SH2, Aquabacterium olei NBRC 110486, Proteus hauseri 15H5D-4a, Proteus sp. CD3, Proteus mirabilis AR379, Proteus mirabilis PmBC1123, Proteus mirabilis VAC, Proteu…	Degradation.Noncarbon-Nutrients.Sulfur-Metabolism.Assimilatory-Sulfate-Reduction.PWY-6683.
197	4-aminobutanoate degradation III	1402/1514	0.5	1	Delftia, Proteus, Desulfovibrio, Escherichia coli, Aquabacterium, Klebsiella	Delftia tsuruhatensis CM13, Delftia sp. HK171, Delftia sp. Cs1-4, Delftia acidovorans SPH-1, Escherichia coli PCN033, Escherichia coli NA114, Escherichia coli O104:H4 FDAARGOS_348, Escherichia coli O104:H4 FDAARGOS_349, Escherichia coli O104:H4 FWSEC0009, Escherichia coli O157 180-PT54, Escherichia coli O157 644-PT8, Escherichia coli O157 FDAARGOS_293, Escherichia coli O157 Al Ain, Escherichia co…
198	TCA cycle I (prokaryotic)	1084/1514	0.9	2	Delftia, Proteus, Desulfovibrio, Escherichia coli, Bilophila wadsworthia, Klebsiella	Delftia acidovorans SPH-1, Escherichia coli NA114, Escherichia coli O104:H4 TY-2482, Escherichia coli O104:H4 FDAARGOS_348, Escherichia coli O104:H4 FDAARGOS_349, Escherichia coli O104:H4 LB226692, Escherichia coli O157 FDAARGOS_293, Escherichia coli O157 Al Ain, Escherichia coli O157 AR-0430, Escherichia coli O157 AR-0429, Escherichia coli O157 AR-0428, Escherichia coli O157 AR-0427, Escherichia…
199	L-valine degradation II	116/1514	0.67	1	Delftia, Proteus, Desulfovibrio, Escherichia coli, Bilophila wadsworthia, Klebsiella	Delftia acidovorans SPH-1, Escherichia coli NA114, Escherichia coli O104:H4 TY-2482, Escherichia coli O104:H4 LB226692, Escherichia coli UMNF18, Escherichia coli J96, Escherichia coli ATCC 25922, Escherichia coli JJ1886, Escherichia coli O157:H7 str. EDL933, Escherichia coli CFT073, Escherichia coli 042, Escherichia coli str. K-12 substr. DH10B, Escherichia coli ETEC H10407, Escherichia coli str.…	Degradation.Amino-Acid-Degradation.Proteinogenic-Amino-Acids-Degradation.VALINE-DEG.PWY-5057.
200	L-arginine biosynthesis II (acetyl cycle)	557/1514	0.89	1	Delftia, Proteus, Desulfovibrio, Oxalobacter, Escherichia coli, Aquabacterium, Bilophila wadsworthia, Klebsiella	Delftia tsuruhatensis CM13, Delftia sp. HK171, Delftia sp. Cs1-4, Delftia acidovorans SPH-1, Escherichia coli NA114, Escherichia coli O104:H4 TY-2482, Escherichia coli O104:H4 FDAARGOS_348, Escherichia coli O104:H4 FDAARGOS_349, Escherichia coli O104:H4 LB226692, Escherichia coli O157 FDAARGOS_293, Escherichia coli UMNF18, Escherichia coli O26 str. RM10386, Escherichia coli O103 str. RM8385, Esch…
201	glutathione-glutaredoxin redox reactions	1432/1514	0.5	1	Delftia, Proteus, Desulfovibrio, Oxalobacter, Escherichia coli, Aquabacterium, Klebsiella	Delftia tsuruhatensis CM13, Delftia sp. HK171, Delftia sp. Cs1-4, Delftia acidovorans SPH-1, Escherichia coli PCN033, Escherichia coli NA114, Escherichia coli O104:H4 TY-2482, Escherichia coli O104:H4 FDAARGOS_348, Escherichia coli O104:H4 FDAARGOS_349, Escherichia coli O104:H4 FWSEC0009, Escherichia coli O104:H4 LB226692, Escherichia coli O157 180-PT54, Escherichia coli O157 644-PT8, Escherichia…
202	thiamine diphosphate biosynthesis III (Staphylococcus)	644/1514	0.67	1	Delftia, Proteus, Desulfovibrio, Oxalobacter, Escherichia coli, Klebsiella	Delftia acidovorans SPH-1, Escherichia coli O104:H4 FDAARGOS_348, Escherichia coli O104:H4 FDAARGOS_349, Escherichia coli O157 FDAARGOS_293, Escherichia coli O26 str. RM10386, Escherichia coli O111 str. RM9322, Escherichia coli O121 str. RM8352, Escherichia coli O145 str. RM9872, Escherichia coli O91 str. RM7190, Escherichia coli O7:K1 str. CE10, Escherichia coli NCCP15648, Escherichia coli ER279…
203	&beta;-alanine biosynthesis III	378/1514	1.0	1	Delftia, Proteus, Desulfovibrio, Oxalobacter, Escherichia coli, Klebsiella	Delftia sp. HK171, Delftia sp. Cs1-4, Delftia acidovorans SPH-1, Escherichia coli NA114, Escherichia coli O104:H4 TY-2482, Escherichia coli O104:H4 LB226692, Escherichia coli O157 Al Ain, Escherichia coli O157 AR-0430, Escherichia coli O157 AR-0429, Escherichia coli O157 AR-0428, Escherichia coli O157 AR-0427, Escherichia coli UMNF18, Escherichia coli O26 str. RM8426, Escherichia coli str. K-12 s…
204	glycolysis II (from fructose 6-phosphate)	2/1514	0.9	1.25	Desulfovibrio	Desulfovibrio sp. Dsv1, Desulfovibrio oxyclinae DSM 11498	Energy-Metabolism.GLYCOLYSIS-VARIANTS.PWY-5484.
205	L-leucine degradation III	2/1514	1.0	2.67	Desulfovibrio	Desulfovibrio magneticus RS-1, Desulfovibrio sp. FW1012B	Degradation.Amino-Acid-Degradation.Proteinogenic-Amino-Acids-Degradation.LEUCINE-DEG.PWY-5076.
206	spermine biosynthesis	9/1514	0.5	0.5	Desulfovibrio	Desulfovibrio putealis DSM 16056, Desulfovibrio fairfieldensis CCUG 45958, Desulfovibrio sp. G11, Desulfovibrio desulfuricans subsp. desulfuricans DSM 642, Desulfovibrio desulfuricans ATCC 27774, Desulfovibrio desulfuricans ND132, Desulfovibrio desulfuricans IC1, Desulfovibrio fructosovorans JJ, Desulfovibrio vulgaris str. 'Miyazaki F'	Biosynthesis.Polyamine-Biosynthesis.ARGSPECAT-PWY.
207	L-citrulline biosynthesis	2/1514	0.88	1.31	Desulfovibrio	Desulfovibrio hydrothermalis AM13 = DSM 14728, Desulfovibrio salexigens DSM 2638	Biosynthesis.Amino-Acid-Biosynthesis.Other-Amino-Acid-Biosynthesis.Citrulline-Biosynthesis.CITRULBIO-PWY.
208	glycine degradation (Stickland reaction)	3/1514	1.0	2	Desulfovibrio	Desulfovibrio fairfieldensis CCUG 45958, Desulfovibrio sp. G11, Desulfovibrio piger	Degradation.Amino-Acid-Degradation.Proteinogenic-Amino-Acids-Degradation.GLYCINE-DEG.PWY-8015.
209	sulfite oxidation III	36/1514	1.0	1.5	Desulfovibrio	Desulfovibrio inopinatus DSM 10711, Desulfovibrio dechloracetivorans BerOc1, Desulfovibrio sp. Dsv1, Candidatus Desulfovibrio trichonymphae Rs-N31, Desulfovibrio magneticus str. Maddingley MBC34 , Desulfovibrio cf. magneticus IFRC170, Desulfovibrio magneticus RS-1, Desulfovibrio hydrothermalis AM13 = DSM 14728, Desulfovibrio brasiliensis JCM 12178, Desulfovibrio ferrophilus IS5, Desulfovibrio sp.…	Degradation.Noncarbon-Nutrients.Sulfur-Metabolism.Sulfite-Oxidation.PWY-5278.
210	betaxanthin biosynthesis (via dopamine)	5/1514	0.5	0.5	Desulfovibrio	Desulfovibrio alaskensis G20, Desulfovibrio vulgaris DP4, Desulfovibrio vulgaris RCH1, Desulfovibrio vulgaris Hildenborough, Desulfovibrio vulgaris str. 'Miyazaki F'	Biosynthesis.SECONDARY-METABOLITE-BIOSYNTHESIS.N-CONTAINING-SECONDARY-CMPD-SYN.ALKALOIDS-SYN.BETALAIN-ALKALOIDS.PWY-5403.
211	sphingomyelin metabolism	2/1514	0.33	0.5	Desulfovibrio	Desulfovibrio magneticus RS-1, Desulfovibrio sp. FW1012B	Biosynthesis.Lipid-Biosynthesis.PWY3DJ-11281.
212	demethylmenaquinol-8 biosynthesis II	16/1514	0.2	0.2	Desulfovibrio	Desulfovibrio dechloracetivorans BerOc1, Desulfovibrio sp. Dsv1, Desulfovibrio magneticus str. Maddingley MBC34 , Desulfovibrio cf. magneticus IFRC170, Desulfovibrio brasiliensis JCM 12178, Desulfovibrio sp. FW1012B, Desulfovibrio sp. 3_1_syn3, Desulfovibrio sp. U5L, Desulfovibrio oxyclinae DSM 11498, Desulfovibrio aminophilus DSM 12254, Desulfovibrio desulfuricans ND132, Desulfovibrio fructosovo…	Biosynthesis.Cofactor-Biosynthesis.Quinone-Biosynthesis.Demethylmenaquinone-Biosynthesis.Demethylmenaquinol-8-Biosynthesis.PWY-6262.
213	L-alanine degradation III	14/1514	1.0	1	Desulfovibrio	Desulfovibrio inopinatus DSM 10711, Desulfovibrio dechloracetivorans BerOc1, Desulfovibrio hydrothermalis AM13 = DSM 14728, Desulfovibrio brasiliensis JCM 12178, Desulfovibrio putealis DSM 16056, Desulfovibrio sp. A2, Desulfovibrio sp. 3_1_syn3, Desulfovibrio oxyclinae DSM 11498, Desulfovibrio aminophilus DSM 12254, Desulfovibrio desulfuricans subsp. desulfuricans DSM 642, Desulfovibrio fructosov…	Degradation.Amino-Acid-Degradation.Proteinogenic-Amino-Acids-Degradation.ALANINE-DEG.ALANINE-DEG3-PWY.
214	adenosylcobinamideGDP salvage from cobinamide II	1/1514	0.17	0.17	Desulfovibrio	Desulfovibrio sp. IOR2	Biosynthesis.Cofactor-Biosynthesis.Vitamin-Biosynthesis.Cobalamin-Biosynthesis.Cobamide-Salvage.B12-Salvage-From-Cobinamide.PWY-7972.
215	3-sulfopropanediol degradation	1/1514	0.33	0.33	Desulfovibrio	Desulfovibrio sp. 3_1_syn3	Degradation.Noncarbon-Nutrients.Sulfur-Metabolism.PWY-6634.
216	phosphatidylcholine biosynthesis V	2/1514	0.67	0.83	Desulfovibrio	Desulfovibrio gigas DSM 1382 = ATCC 19364, Desulfovibrio sp. X2	Biosynthesis.Lipid-Biosynthesis.Phospholipid-Biosynthesis.PhosphatidylcholineBiosynthesis.PWY-6825.
217	L-arginine degradation VI (arginase 2 pathway)	2/1514	0.75	0.75	Desulfovibrio	Desulfovibrio hydrothermalis AM13 = DSM 14728, Desulfovibrio salexigens DSM 2638	Degradation.Amino-Acid-Degradation.Proteinogenic-Amino-Acids-Degradation.ARGININE-DEG.ARG-PRO-PWY./Biosynthesis.Amino-Acid-Biosynthesis.IND-AMINO-ACID-SYN.PROLINE-SYN.ARG-PRO-PWY.
218	acetone degradation II (to acetoacetate)	1/1514	0.5	0.5	Desulfovibrio	Desulfovibrio desulfuricans subsp. desulfuricans DSM 642	Degradation.Fatty-Acid-and-Lipid-Degradation.Acetone-Degradation.PWY-5533.
219	trehalose degradation III	1/1514	1.0	1	Desulfovibrio	Desulfovibrio desulfuricans ND132	Degradation.Carbohydrates-Degradation.Sugars-And-Polysaccharides-Degradation.Trehalose-Degradation.PWY-2721.
220	L-isoleucine biosynthesis V	1/1514	0.67	0.67	Desulfovibrio	Candidatus Desulfovibrio trichonymphae Rs-N31	Biosynthesis.Amino-Acid-Biosynthesis.IND-AMINO-ACID-SYN.ISOLEUCINE-SYN.PWY-5108.
221	Rubisco shunt	1/1514	1.0	2	Desulfovibrio	Desulfovibrio putealis DSM 16056	Energy-Metabolism.PWY-5723.
222	alginate biosynthesis I (algal)	1/1514	0.75	0.75	Desulfovibrio	Desulfovibrio brasiliensis JCM 12178	Glycan-Glycan-Biosynthesis.Polysaccharides-Biosynthesis.Alginate-Biosynthesis.PWY-6073./Biosynthesis.Carbohydrates-Biosynthesis.Glycan-Biosynthesis.Polysaccharides-Biosynthesis.Alginate-Biosynthesis.PWY-6073./Biosynthesis.Carbohydrates-Biosynthesis.Polysaccharides-Biosynthesis.Alginate-Biosynthesis.PWY-6073.
223	camptothecin biosynthesis	5/1514	0.2	0.2	Desulfovibrio	Desulfovibrio alaskensis G20, Desulfovibrio vulgaris DP4, Desulfovibrio vulgaris RCH1, Desulfovibrio vulgaris Hildenborough, Desulfovibrio vulgaris str. 'Miyazaki F'	Biosynthesis.SECONDARY-METABOLITE-BIOSYNTHESIS.N-CONTAINING-SECONDARY-CMPD-SYN.ALKALOIDS-SYN.QUINOLINE-ALKALOIDS.PWY-6326.
224	L-isoleucine biosynthesis IV	14/1514	0.67	1.42	Desulfovibrio	Candidatus Desulfovibrio trichonymphae Rs-N31, Desulfovibrio magneticus str. Maddingley MBC34 , Desulfovibrio cf. magneticus IFRC170, Desulfovibrio ferrophilus IS5, Desulfovibrio sp. IOR2, Desulfovibrio putealis DSM 16056, Desulfovibrio carbinolicus DSM 3852, Desulfovibrio sp. FW1012B, Desulfovibrio fairfieldensis CCUG 45958, Desulfovibrio sp. U5L, Desulfovibrio sp. G11, Desulfovibrio aminophilus…	Biosynthesis.Amino-Acid-Biosynthesis.IND-AMINO-ACID-SYN.ISOLEUCINE-SYN.PWY-5104.
225	CDP-diacylglycerol biosynthesis III	5/1514	0.6	0.6	Desulfovibrio	Candidatus Desulfovibrio trichonymphae Rs-N31, Desulfovibrio sp. FW1012B, Desulfovibrio fairfieldensis CCUG 45958, Desulfovibrio sp. G11, Desulfovibrio piger	Biosynthesis.Lipid-Biosynthesis.Phospholipid-Biosynthesis.CDP-diacylglycerol-Biosynthesis.PWY-5981.
226	L-ornithine biosynthesis II	1/1514	1.0	1.17	Desulfovibrio	Desulfovibrio salexigens DSM 2638	Biosynthesis.Amino-Acid-Biosynthesis.Other-Amino-Acid-Biosynthesis.L-Ornithine-Biosynthesis.ARGININE-SYN4-PWY.
227	L-methionine biosynthesis III	10/1514	1.0	1	Desulfovibrio	Desulfovibrio brasiliensis JCM 12178, Desulfovibrio putealis DSM 16056, Desulfovibrio sp. FW1012B, Desulfovibrio alaskensis G20, Desulfovibrio aminophilus DSM 12254, Desulfovibrio desulfuricans ND132, Desulfovibrio vulgaris DP4, Desulfovibrio vulgaris RCH1, Desulfovibrio vulgaris Hildenborough, Desulfovibrio vulgaris str. 'Miyazaki F'	Super-HSERMETANA-PWY./Biosynthesis.Amino-Acid-Biosynthesis.IND-AMINO-ACID-SYN.METHIONINE-SYN.Methionine-De-novo-Biosynthesis.HSERMETANA-PWY.
228	diacylglyceryl-N,N,N-trimethylhomoserine biosynthesis	5/1514	0.5	0.5	Desulfovibrio	Desulfovibrio inopinatus DSM 10711, Desulfovibrio magneticus str. Maddingley MBC34 , Desulfovibrio putealis DSM 16056, Desulfovibrio sp. FW1012B, Desulfovibrio sp. U5L	Biosynthesis.SECONDARY-METABOLITE-BIOSYNTHESIS.PWY-6795./Biosynthesis.Lipid-Biosynthesis.PWY-6795.
229	2-oxoisovalerate decarboxylation to isobutanoyl-CoA	8/1514	1.0	1.33	Desulfovibrio	Candidatus Desulfovibrio trichonymphae Rs-N31, Desulfovibrio ferrophilus IS5, Desulfovibrio sp. IOR2, Desulfovibrio carbinolicus DSM 3852, Desulfovibrio fairfieldensis CCUG 45958, Desulfovibrio sp. G11, Desulfovibrio desulfuricans IC1, Desulfovibrio piger	Energy-Metabolism.Respiration.PWY-5046.
230	coenzyme M biosynthesis I	13/1514	0.14	0.14	Desulfovibrio	Desulfovibrio inopinatus DSM 10711, Desulfovibrio dechloracetivorans BerOc1, Desulfovibrio magneticus str. Maddingley MBC34 , Desulfovibrio cf. magneticus IFRC170, Desulfovibrio magneticus RS-1, Desulfovibrio brasiliensis JCM 12178, Desulfovibrio sp. FW1012B, Desulfovibrio sp. U5L, Desulfovibrio oxyclinae DSM 11498, Desulfovibrio aminophilus DSM 12254, Desulfovibrio desulfuricans ND132, Desulfovi…	Biosynthesis.Cofactor-Biosynthesis.Coenzyme-M-Biosynthesis.P261-PWY.
231	L-tryptophan degradation VI (via tryptamine)	1/1514	0.33	0.33	Desulfovibrio	Desulfovibrio alaskensis G20	Degradation.Amino-Acid-Degradation.Proteinogenic-Amino-Acids-Degradation.TRYPTOPHAN-DEG.PWY-3181./Biosynthesis.SECONDARY-METABOLITE-BIOSYNTHESIS.N-CONTAINING-SECONDARY-CMPD-SYN.ALKALOIDS-SYN.PWY-3181./Biosynthesis.SECONDARY-METABOLITE-BIOSYNTHESIS.N-CONTAINING-SECONDARY-CMPD-SYN.PWY-3181.
232	fatty acids biosynthesis (yeast)	3/1514	1.0	1	Desulfovibrio	Desulfovibrio alaskensis G20, Desulfovibrio vulgaris DP4, Desulfovibrio vulgaris Hildenborough	Biosynthesis.Lipid-Biosynthesis.Fatty-acid-biosynthesis.PWY-5970.
233	L-lysine degradation X	2/1514	0.25	0.25	Desulfovibrio	Desulfovibrio dechloracetivorans BerOc1, Desulfovibrio sp. A2	Degradation.Amino-Acid-Degradation.Proteinogenic-Amino-Acids-Degradation.LYSINE-DEG.PWY-6328.
234	dimethylsulfoniopropanoate degradation I (cleavage)	2/1514	1.0	1	Desulfovibrio	Desulfovibrio brasiliensis JCM 12178, Desulfovibrio oxyclinae DSM 11498	Degradation.Noncarbon-Nutrients.Sulfur-Metabolism.Dimethylsulfoniopropionate-Degradation.PWY-6046.
235	L-lysine degradation IV	1/1514	0.2	0.2	Desulfovibrio	Desulfovibrio dechloracetivorans BerOc1	Degradation.Amino-Acid-Degradation.Proteinogenic-Amino-Acids-Degradation.LYSINE-DEG.PWY-5280.
236	L-carnitine degradation II	1/1514	0.25	0.25	Desulfovibrio	Desulfovibrio oxyclinae DSM 11498	Degradation.AMINE-DEG.CARN-DEG.PWY-3602.
237	Calvin-Benson-Bassham cycle	3/1514	0.69	1.46	Desulfovibrio, Aquabacterium	Aquabacterium olei NBRC 110486, Desulfovibrio hydrothermalis AM13 = DSM 14728, Desulfovibrio putealis DSM 16056	Degradation.C1-COMPOUNDS.CO2-Fixation.Autotrophic-CO2-Fixation.CALVIN-PWY./Energy-Metabolism.Photosynthesis.CALVIN-PWY./Biosynthesis.Carbohydrates-Biosynthesis.CARBO-BIOSYNTHESIS.CALVIN-PWY.
238	trehalose biosynthesis V	69/1514	0.67	0.67	Desulfovibrio, Aquabacterium, Escherichia coli, Bilophila wadsworthia, Klebsiella	Escherichia coli O104:H4 TY-2482, Escherichia coli 042, Escherichia coli ETEC H10407, Escherichia coli O139:H28 str. E24377A, Escherichia coli HS, Escherichia coli E110019, Escherichia coli SMS-3-5, Escherichia coli ATCC 8739, Escherichia coli J53, Escherichia coli NCTC86, Escherichia coli IAI1, Escherichia coli IAI39, Escherichia coli ABU 83972, Escherichia coli TW11681, Escherichia coli TW10598…	Biosynthesis.Metabolic-Regulators.Organic-solutes-Biosynthesis.Trehalose-biosynthesis.PWY-2661./Biosynthesis.Carbohydrates-Biosynthesis.CARBO-BIOSYNTHESIS.Trehalose-biosynthesis.PWY-2661.
239	trehalose biosynthesis IV	57/1514	1.0	1	Desulfovibrio, Aquabacterium, Escherichia coli, Klebsiella	Escherichia coli B7A, Aquabacterium olei NBRC 110486, Desulfovibrio inopinatus DSM 10711, Desulfovibrio magneticus str. Maddingley MBC34 , Desulfovibrio cf. magneticus IFRC170, Desulfovibrio ferrophilus IS5, Desulfovibrio putealis DSM 16056, Desulfovibrio carbinolicus DSM 3852, Desulfovibrio sp. FW1012B, Desulfovibrio alaskensis G20, Desulfovibrio sp. U5L, Desulfovibrio fructosovorans JJ, Desulfo…	Biosynthesis.Metabolic-Regulators.Organic-solutes-Biosynthesis.Trehalose-biosynthesis.PWY-2622./Biosynthesis.Carbohydrates-Biosynthesis.CARBO-BIOSYNTHESIS.Trehalose-biosynthesis.PWY-2622.
240	benzoyl-CoA degradation III (anaerobic)	9/1514	0.11	0.11	Desulfovibrio, Aquabacterium, Escherichia coli, Klebsiella	Escherichia coli 'BL21-Gold(DE3)pLysS AG', Aquabacterium olei NBRC 110486, Desulfovibrio inopinatus DSM 10711, Desulfovibrio hydrothermalis AM13 = DSM 14728, Desulfovibrio fructosovorans JJ, Desulfovibrio salexigens DSM 2638, Desulfovibrio vulgaris RCH1, Desulfovibrio longus DSM 6739, Klebsiella variicola At-22	Degradation.AROMATIC-COMPOUNDS-DEGRADATION.Benzoyl-CoA-Degradation.P321-PWY.
241	cyclohexane-1-carboxylate degradation (anaerobic)	518/1514	0.5	0.5	Desulfovibrio, Aquabacterium, Escherichia coli, Klebsiella	Escherichia coli O104:H4 FDAARGOS_348, Escherichia coli O104:H4 FDAARGOS_349, Escherichia coli O157 FDAARGOS_293, Escherichia coli O26 str. RM10386, Escherichia coli O103 str. RM8385, Escherichia coli O111 str. RM9322, Escherichia coli O121 str. RM8352, Escherichia coli O145 str. RM9872, Escherichia coli O91 str. RM7190, Escherichia coli O7:K1 str. CE10, Escherichia coli NCCP15648, Escherichia co…
242	L-glutamate degradation I	470/1514	1.0	1	Desulfovibrio, Aquabacterium, Escherichia coli, Klebsiella	Escherichia coli O104:H4 FDAARGOS_348, Escherichia coli O104:H4 FDAARGOS_349, Escherichia coli O157 FDAARGOS_293, Escherichia coli O121 str. RM8352, Escherichia coli O145 str. RM9872, Escherichia coli O91 str. RM7190, Escherichia coli O7:K1 str. CE10, Escherichia coli O104:H4 str. 2011C-3493, Escherichia coli NCCP15648, Escherichia coli ER2796, Escherichia coli O145:H28 str. RM12761, Escherichia …
243	GDP-L-fucose biosynthesis I (from GDP-D-mannose)	885/1514	1.0	1	Desulfovibrio, Aquabacterium, Escherichia coli, Klebsiella	Escherichia coli PCN033, Escherichia coli NA114, Escherichia coli O104:H4 TY-2482, Escherichia coli O104:H4 FDAARGOS_348, Escherichia coli O104:H4 FDAARGOS_349, Escherichia coli O104:H4 FWSEC0009, Escherichia coli O104:H4 LB226692, Escherichia coli O157 180-PT54, Escherichia coli O157 644-PT8, Escherichia coli O157 FDAARGOS_293, Escherichia coli O157 Al Ain, Escherichia coli O157 AR-0430, Escheri…
244	(1,4)-&beta;-D-xylan degradation	270/1514	0.5	0.5	Desulfovibrio, Aquabacterium, Escherichia coli, Klebsiella, Morganella	Escherichia coli O104:H4 TY-2482, Escherichia coli O104:H4 LB226692, Escherichia coli UMNF18, Escherichia coli str. K-12 substr. MDS42, Escherichia coli str. K-12 substr. MDS42 MDS42 substr. SynA, Escherichia coli str. K-12 substr. MDS42 MDS42 substr. SynC, Escherichia coli str. K-12 substr. MDS42 SynAC substr. MDS42, Escherichia coli O104:H4 str. 2011C-3493, Escherichia coli J96, Escherichia col…	Glycan-Glycan-Degradation.PWY-6717./Degradation.Polymer-Degradation.POLYSACCHARIDES-DEG.Glycan-Degradation.PWY-6717./Degradation.Polymer-Degradation.POLYSACCHARIDES-DEG.Xylan-Degradation.PWY-6717./Degradation.Carbohydrates-Degradation.POLYSACCHARIDES-DEG.Glycan-Degradation.PWY-6717./Degradation.Carbohydrates-Degradation.POLYSACCHARIDES-DEG.Xylan-Degradation.PWY-6717.
245	NADH repair	1380/1514	0.25	0.25	Desulfovibrio, Aquabacterium, Escherichia coli, Klebsiella, Oxalobacter	Escherichia coli PCN033, Escherichia coli NA114, Escherichia coli O104:H4 TY-2482, Escherichia coli O104:H4 FDAARGOS_348, Escherichia coli O104:H4 FDAARGOS_349, Escherichia coli O104:H4 FWSEC0009, Escherichia coli O104:H4 LB226692, Escherichia coli O157 180-PT54, Escherichia coli O157 644-PT8, Escherichia coli O157 FDAARGOS_293, Escherichia coli O157 Al Ain, Escherichia coli O157 AR-0430, Escheri…
246	UDP-&alpha;-D-glucuronate biosynthesis (from UDP-glucose)	1325/1514	1.0	1	Desulfovibrio, Aquabacterium, Escherichia coli, Klebsiella, Proteus	Escherichia coli PCN033, Escherichia coli O104:H4 FDAARGOS_348, Escherichia coli O104:H4 FDAARGOS_349, Escherichia coli O104:H4 FWSEC0009, Escherichia coli O157 180-PT54, Escherichia coli O157 644-PT8, Escherichia coli O157 FDAARGOS_293, Escherichia coli O157 Al Ain, Escherichia coli O157 AR-0430, Escherichia coli O157 AR-0429, Escherichia coli O157 AR-0428, Escherichia coli O157 AR-0427, Escheri…
247	formaldehyde oxidation VI (H4MPT pathway)	3/1514	0.5	0.5	Desulfovibrio, Aquabacterium, Klebsiella	Aquabacterium olei NBRC 110486, Desulfovibrio dechloracetivorans BerOc1, Klebsiella michiganensis RC10	Degradation.C1-COMPOUNDS.Formaldehyde-Oxidation.PWY-1723.
248	sulfur oxidation IV (intracellular sulfur)	30/1514	0.2	0.6	Desulfovibrio, Bilophila wadsworthia	Desulfovibrio inopinatus DSM 10711, Desulfovibrio dechloracetivorans BerOc1, Desulfovibrio sp. Dsv1, Desulfovibrio magneticus str. Maddingley MBC34 , Desulfovibrio cf. magneticus IFRC170, Desulfovibrio magneticus RS-1, Desulfovibrio hydrothermalis AM13 = DSM 14728, Desulfovibrio brasiliensis JCM 12178, Desulfovibrio putealis DSM 16056, Desulfovibrio sp. A2, Desulfovibrio sp. FW1012B, Desulfovibri…	Degradation.Noncarbon-Nutrients.Sulfur-Metabolism.Sulfur-Oxidation.PWY-6675.
249	glycolate and glyoxylate degradation III	7/1514	0.33	1	Desulfovibrio, Bilophila wadsworthia	Desulfovibrio sp. Dsv1, Desulfovibrio brasiliensis JCM 12178, Desulfovibrio sp. 3_1_syn3, Desulfovibrio aminophilus DSM 12254, Desulfovibrio desulfuricans subsp. desulfuricans DSM 642, Desulfovibrio piger ATCC 29098, Bilophila wadsworthia 3_1_6	Degradation.CARBOXYLATES-DEG.Glycolate-Degradation.PWY-6649.
250	sulfide oxidation II (sulfide dehydrogenase)	14/1514	1.0	2	Desulfovibrio, Bilophila wadsworthia	Desulfovibrio dechloracetivorans BerOc1, Desulfovibrio sp. Dsv1, Desulfovibrio magneticus str. Maddingley MBC34 , Desulfovibrio cf. magneticus IFRC170, Desulfovibrio brasiliensis JCM 12178, Desulfovibrio putealis DSM 16056, Desulfovibrio sp. A2, Desulfovibrio sp. 3_1_syn3, Desulfovibrio sp. U5L, Desulfovibrio oxyclinae DSM 11498, Desulfovibrio aminophilus DSM 12254, Desulfovibrio desulfuricans su…	Degradation.Noncarbon-Nutrients.Sulfur-Metabolism.Sulfide-Oxidation.PWY-5274.
251	dissimilatory sulfate reduction II (to thiosulfate)	35/1514	0.6	1.4	Desulfovibrio, Bilophila wadsworthia	Desulfovibrio inopinatus DSM 10711, Desulfovibrio dechloracetivorans BerOc1, Desulfovibrio sp. Dsv1, Desulfovibrio magneticus str. Maddingley MBC34 , Desulfovibrio cf. magneticus IFRC170, Desulfovibrio magneticus RS-1, Desulfovibrio hydrothermalis AM13 = DSM 14728, Desulfovibrio brasiliensis JCM 12178, Desulfovibrio ferrophilus IS5, Desulfovibrio sp. IOR2, Desulfovibrio putealis DSM 16056, Desulf…	Degradation.Noncarbon-Nutrients.Sulfur-Metabolism.Dissimilatory-Sulfate-Reduction.P224-PWY./Energy-Metabolism.Respiration.ANAEROBIC-RESPIRATION.P224-PWY.
252	pyridoxal 5'-phosphate biosynthesis II	6/1514	1.0	1	Desulfovibrio, Bilophila wadsworthia	Desulfovibrio sp. Dsv1, Desulfovibrio sp. 3_1_syn3, Desulfovibrio desulfuricans subsp. desulfuricans DSM 642, Desulfovibrio desulfuricans ATCC 27774, Desulfovibrio piger ATCC 29098, Bilophila wadsworthia 3_1_6	Biosynthesis.Cofactor-Biosynthesis.Vitamin-Biosynthesis.Vitamin-B6-Biosynthesis.PWY-6466.
253	phenylacetate degradation II (anaerobic)	28/1514	0.33	1.33	Desulfovibrio, Bilophila wadsworthia	Desulfovibrio inopinatus DSM 10711, Desulfovibrio dechloracetivorans BerOc1, Desulfovibrio sp. Dsv1, Desulfovibrio magneticus str. Maddingley MBC34 , Desulfovibrio cf. magneticus IFRC170, Desulfovibrio hydrothermalis AM13 = DSM 14728, Desulfovibrio brasiliensis JCM 12178, Desulfovibrio putealis DSM 16056, Desulfovibrio sp. A2, Desulfovibrio sp. FW1012B, Desulfovibrio sp. 3_1_syn3, Desulfovibrio a…	Degradation.AROMATIC-COMPOUNDS-DEGRADATION.Phenolic-Compounds-Degradation.Phenylacetate-Degradation.PWY-1341.
254	thiosulfate disproportionation II (cytochrome)	38/1514	1.0	1	Desulfovibrio, Bilophila wadsworthia, Escherichia coli	Escherichia coli O121 str. RM8352, Escherichia coli O114:H49, Escherichia coli SE11, Escherichia coli C11, Escherichia coli C5, Escherichia coli H14, Escherichia coli S21, Escherichia coli H15, Escherichia coli 13E0725, Escherichia coli 13E0780, Escherichia coli ETEC-2264, Escherichia coli 1943, Escherichia coli ATCC 43896, Escherichia coli AR_0019, Escherichia coli 2013C-4830, Escherichia coli 2…	Degradation.Noncarbon-Nutrients.Sulfur-Metabolism.Thiosulfate-Disproportionation.PWY-5352./Energy-Metabolism.PWY-5352.
255	pyrimidine deoxyribonucleotides de novo biosynthesis III	37/1514	0.5	0.5	Desulfovibrio, Bilophila wadsworthia, Escherichia coli	Escherichia coli 14EC033, Desulfovibrio inopinatus DSM 10711, Desulfovibrio dechloracetivorans BerOc1, Candidatus Desulfovibrio trichonymphae Rs-N31, Desulfovibrio magneticus str. Maddingley MBC34 , Desulfovibrio cf. magneticus IFRC170, Desulfovibrio magneticus RS-1, Desulfovibrio hydrothermalis AM13 = DSM 14728, Desulfovibrio brasiliensis JCM 12178, Desulfovibrio ferrophilus IS5, Desulfovibrio s…	Metabolic-Clusters.PWY-6545./Biosynthesis.Nucleotide-Biosynthesis.PYR-NUC-SYN.Pyrimidine-De-Novo-Biosyn.Pyrimid-Deoxyribonucleot-De-Novo-Biosyn.PWY-6545./Biosynthesis.Nucleotide-Biosynthesis.Deoxyribonucleotide-Biosynthesis.Pyrimid-Deoxyribonucleot-De-Novo-Biosyn.PWY-6545.
256	hydrogen production III	40/1514	1.0	2	Desulfovibrio, Bilophila wadsworthia, Escherichia coli	Escherichia coli NA114, Escherichia coli JJ1886, Escherichia coli B171, Escherichia coli B str. REL606, Escherichia coli SE15, Escherichia coli DH1, Escherichia coli ABU 83972, Escherichia coli 'BL21-Gold(DE3)pLysS AG', Desulfovibrio inopinatus DSM 10711, Desulfovibrio dechloracetivorans BerOc1, Candidatus Desulfovibrio trichonymphae Rs-N31, Desulfovibrio magneticus str. Maddingley MBC34 , Desulf…	Energy-Metabolism.Hydrogen-Production.PWY-6759.
257	thiosulfate disproportionation I (thiol-dependent)	7/1514	1.0	1	Desulfovibrio, Bilophila wadsworthia, Escherichia coli	Escherichia coli SE11, Desulfovibrio magneticus RS-1, Desulfovibrio sp. FW1012B, Desulfovibrio alaskensis G20, Desulfovibrio aminophilus DSM 12254, Desulfovibrio vulgaris Hildenborough, Bilophila wadsworthia 3_1_6	Degradation.Noncarbon-Nutrients.Sulfur-Metabolism.Thiosulfate-Disproportionation.PWY-5277./Energy-Metabolism.PWY-5277.
258	dissimilatory sulfate reduction I (to hydrogen sufide))	37/1514	0.6	1.4	Desulfovibrio, Bilophila wadsworthia, Escherichia coli	Escherichia coli M10, Escherichia coli 2014C-3075, Desulfovibrio inopinatus DSM 10711, Desulfovibrio dechloracetivorans BerOc1, Desulfovibrio sp. Dsv1, Desulfovibrio magneticus str. Maddingley MBC34 , Desulfovibrio cf. magneticus IFRC170, Desulfovibrio magneticus RS-1, Desulfovibrio hydrothermalis AM13 = DSM 14728, Desulfovibrio brasiliensis JCM 12178, Desulfovibrio ferrophilus IS5, Desulfovibrio…	Degradation.Noncarbon-Nutrients.Sulfur-Metabolism.Dissimilatory-Sulfate-Reduction.DISSULFRED-PWY./Energy-Metabolism.Respiration.ANAEROBIC-RESPIRATION.DISSULFRED-PWY.
259	PRPP biosynthesis II	72/1514	0.67	1	Desulfovibrio, Bilophila wadsworthia, Escherichia coli, Klebsiella	Escherichia coli NA114, Escherichia coli O104:H4 TY-2482, Escherichia coli O104:H4 LB226692, Escherichia coli UMNF18, Escherichia coli J96, Escherichia coli ATCC 25922, Escherichia coli JJ1886, Escherichia coli O157:H7 str. EDL933, Escherichia coli CFT073, Escherichia coli 042, Escherichia coli str. K-12 substr. DH10B, Escherichia coli ETEC H10407, Escherichia coli str. K-12 substr. W3110, Escher…	Biosynthesis.Other-biosynthesis.PRPP-Biosynthesis.PWY0-661.
260	nitrate reduction I (denitrification)	83/1514	0.5	1	Desulfovibrio, Bilophila wadsworthia, Escherichia coli, Klebsiella	Escherichia coli O104:H4 TY-2482, Escherichia coli O104:H4 LB226692, Escherichia coli UMNF18, Escherichia coli J96, Escherichia coli ATCC 25922, Escherichia coli JJ1886, Escherichia coli CFT073, Escherichia coli 042, Escherichia coli str. K-12 substr. DH10B, Escherichia coli ETEC H10407, Escherichia coli str. K-12 substr. W3110, Escherichia coli Nissle 1917, Escherichia coli O139:H28 str. E24377A…	Degradation.Noncarbon-Nutrients.NITROGEN-DEG.Nitrate-Reduction.DENITRIFICATION-PWY./Degradation.Noncarbon-Nutrients.NITROGEN-DEG.Denitrification.DENITRIFICATION-PWY./Energy-Metabolism.Respiration.ANAEROBIC-RESPIRATION.DENITRIFICATION-PWY.
261	cardiolipin biosynthesis II	19/1514	1.0	1.33	Desulfovibrio, Bilophila wadsworthia, Escherichia coli, Klebsiella	Escherichia coli NA114, Escherichia coli ETEC H10407, Escherichia coli SE15, Escherichia coli BL21(DE3), Escherichia coli O25b:H4-ST131 EC958, Desulfovibrio sp. Dsv1, Desulfovibrio magneticus str. Maddingley MBC34 , Desulfovibrio brasiliensis JCM 12178, Desulfovibrio sp. FW1012B, Desulfovibrio sp. U5L, Desulfovibrio aminophilus DSM 12254, Bilophila wadsworthia 3_1_6, Klebsiella michiganensis E718…	Biosynthesis.Lipid-Biosynthesis.Phospholipid-Biosynthesis.Cardiolipin-Biosynthesis.PWY-5269.
262	TCA cycle VIII (Helicobacter)	48/1514	0.78	1.78	Desulfovibrio, Bilophila wadsworthia, Escherichia coli, Klebsiella	Escherichia coli NA114, Escherichia coli JJ1886, Escherichia coli ETEC H10407, Escherichia coli O139:H28 str. E24377A, Escherichia coli B7A, Escherichia coli SE15, Escherichia coli BL21(DE3), Escherichia coli DH1, Escherichia coli IAI1, Escherichia coli ABU 83972, Escherichia coli 'BL21-Gold(DE3)pLysS AG', Escherichia coli O25b:H4-ST131 EC958, Desulfovibrio inopinatus DSM 10711, Desulfovibrio dec…	Energy-Metabolism.TCA-VARIANTS.REDCITCYC.
263	methylphosphonate degradation I	1407/1514	0.75	1.5	Desulfovibrio, Bilophila wadsworthia, Escherichia coli, Klebsiella	Escherichia coli PCN033, Escherichia coli NA114, Escherichia coli O104:H4 TY-2482, Escherichia coli O104:H4 FDAARGOS_348, Escherichia coli O104:H4 FDAARGOS_349, Escherichia coli O104:H4 FWSEC0009, Escherichia coli O104:H4 LB226692, Escherichia coli O157 180-PT54, Escherichia coli O157 644-PT8, Escherichia coli O157 FDAARGOS_293, Escherichia coli O157 Al Ain, Escherichia coli O157 AR-0430, Escheri…
264	uracil degradation III	912/1514	0.33	0.33	Desulfovibrio, Bilophila wadsworthia, Escherichia coli, Klebsiella	Escherichia coli PCN033, Escherichia coli NA114, Escherichia coli O104:H4 TY-2482, Escherichia coli O104:H4 FDAARGOS_348, Escherichia coli O104:H4 FDAARGOS_349, Escherichia coli O104:H4 FWSEC0009, Escherichia coli O104:H4 LB226692, Escherichia coli O157 180-PT54, Escherichia coli O157 644-PT8, Escherichia coli O157 FDAARGOS_293, Escherichia coli O157 Al Ain, Escherichia coli O157 AR-0430, Escheri…
265	pyruvate fermentation to acetoin III	66/1514	0.33	0.33	Desulfovibrio, Bilophila wadsworthia, Escherichia coli, Klebsiella	Escherichia coli NA114, Escherichia coli O104:H4 TY-2482, Escherichia coli UMNF18, Escherichia coli J96, Escherichia coli ATCC 25922, Escherichia coli O157:H7 str. EDL933, Escherichia coli CFT073, Escherichia coli 042, Escherichia coli str. K-12 substr. DH10B, Escherichia coli str. K-12 substr. W3110, Escherichia coli Nissle 1917, Escherichia coli O139:H28 str. E24377A, Escherichia coli HS, Esche…	Energy-Metabolism.Fermentation.Pyruvate-Degradation.Acetoin-Biosynthesis.PWY3O-440.
266	superpathway of pyrimidine deoxyribonucleosides degradation	80/1514	1.0	1.33	Desulfovibrio, Bilophila wadsworthia, Escherichia coli, Klebsiella	Escherichia coli NA114, Escherichia coli O104:H4 TY-2482, Escherichia coli O104:H4 LB226692, Escherichia coli UMNF18, Escherichia coli J96, Escherichia coli ATCC 25922, Escherichia coli JJ1886, Escherichia coli O157:H7 str. EDL933, Escherichia coli CFT073, Escherichia coli 042, Escherichia coli str. K-12 substr. DH10B, Escherichia coli ETEC H10407, Escherichia coli str. K-12 substr. W3110, Escher…	Degradation.NUCLEO-DEG.Pyrimidine-Degradation.PWY0-1298./Super-PWY0-1298.
267	ribitol degradation	22/1514	0.67	1	Desulfovibrio, Bilophila wadsworthia, Escherichia coli, Klebsiella	Escherichia coli O6:H16 2014EL-1346-6, Escherichia coli ETEC H10407, Escherichia coli O127:H6 str. E2348/69, Escherichia coli TW10598, Desulfovibrio sp. FW1012B, Bilophila wadsworthia 3_1_6, Klebsiella michiganensis KCTC 1686, Klebsiella michiganensis E718, Klebsiella aerogenes KCTC 2190, Klebsiella pneumoniae JH1, Klebsiella pneumoniae 1162281, Klebsiella pneumoniae KCTC 2242, Klebsiella pneumon…	Degradation.SECONDARY-METABOLITE-DEGRADATION.Sugar-Derivatives.SUGAR-ALCOHOLS-DEG.RIBITOLUTIL-PWY.
[truncated: 433 more rows]
